# Supplementary material for: Tranylcypromine specificity for monoamine oxidase is limited by promiscuous protein labelling and lysosomal trapping
Source: Royal Society of Chemistry journal article supplement (doi:10.1039/d0cb00048e), 2020-01-01
Supplement: d0cb00048e1.xlsx [file d0cb00048e1.xlsx]

## Sheet: Key
Supplementary_Table_S1
	Abbreviations
Experimental design (LFQ - SH-SY5Y - FBP1)	DMSO (D) - DMSO treated control cells FBP1 (1) - Probe treated cells FBP1K (1K) - Competition with pargyline	LFQ-intensities were obtained from three samples per condition.	LFQ intensities were log2-transformed and -log10(p-values) were obtained by a two-sided two sample Student’s t-test
Experimental design (LFQ - SH-SY5Y - FBP2)	DMSO (D) - DMSO treated control cells FBP2 (2) - Probe treated cells FBP2K (2K) - Competition with tranylcypromine	LFQ-intensities were obtained from three samples per condition.	LFQ intensities were log2-transformed and -log10(p-values) were obtained by a two-sided two sample Student’s t-test
Experimental design (LFQ - HeLa - FBP1)	DMSO (D) - DMSO treated control cells FBP1 (1) - Probe treated cells FBP1_comp (1K) - Competition with pargyline	LFQ-intensities were obtained from four samples per condition.	LFQ intensities were log2-transformed and -log10(p-values) were obtained by a two-sided two sample Student’s t-test
Experimental design (LFQ - HeLa - FBP2)	DMSO (D) - DMSO treated control cells FBP2 (2) - Probe treated cells FBP2_comp (2K) - Competition with tranylcypromine	LFQ-intensities were obtained from four samples per condition.	LFQ intensities were log2-transformed and -log10(p-values) were obtained by a two-sided two sample Student’s t-test
Experimental design (LFQ - SH-SY5Y - FBPP2)	1-3 (D) - DMSO/DMSO treated control cells 4-6 (C) - Chloroquine/DMSO treated cells 7-9 (P) - DMSO/Probe treated control cells 10-12 (CP) - Chloroquine/Probe treated cells	LFQ-intensities were obtained from three samples per condition.	LFQ intensities were log2-transformed and -log10(p-values) were obtained by a two-sided two sample Student’s t-test
Experimental design (LFQ - HeLa - FBPP2)	Comp (C) - Competition with tranylcypromine DMSO (D) - DMSO treated control cells Probe (P) - Probe treated cells	LFQ-intensities were obtained from four samples per condition.	LFQ intensities were log2-transformed and -log10(p-values) were obtained by a two-sided two sample Student’s t-test
General	NaN = not a number (not quantified in proteomics); LFQ = label-free quantification

## Sheet: SH-SY5Y_FBP1
Protein IDs	Majority protein IDs	Protein names	Gene names	Student's T-test Significant 1_D	Student's T-test Significant 1k_1	Sequence coverage [%]	Mol. weight [kDa]	-Log Student's T-test p-value 1_D	Student's T-test q-value 1_D	Student's T-test Difference 1_D	Student's T-test Test statistic 1_D	-Log Student's T-test p-value 1k_1	Student's T-test q-value 1k_1	Student's T-test Difference 1k_1	Student's T-test Test statistic 1k_1	LFQ intensity DMSO_1	LFQ intensity DMSO_2	LFQ intensity DMSO_3	LFQ intensity FBP1_1	LFQ intensity FBP1_2	LFQ intensity FBP1_3	LFQ intensity FBP1K_1	LFQ intensity FBP1K_2	LFQ intensity FBP1K_3
Q53YE7;Q53EZ0;P21397;Q49A63;Q5ULA3;A0A1W5KJW8;Q5ULA9;Q5UL91	Q53YE7;Q53EZ0;P21397;Q49A63	Amine oxidase [flavin-containing] A	MAOA	+		45.5	59.681	5.68664	0	6.33619	41.2833	3.70871	0.102667	-6.05314	-13.1084	24.8577	24.6122	24.8798	31.059	31.3638	30.9355	24.2877	25.0861	25.825
A0A059RPW0;C8YAE4;A0A3Q9CRG5;A0A344AJR8;A0A059R5S6;X5D927;X5C9H5;X5BMX5;X5BDH6;W8DJ92;W8D226;W0C7W3;V9N872;V9N3I6;V9JVR4;V9JU54;V9JI12;V9JCG6;V9JAP4;V9J9K8;V9J978;V9J4D6;V9J248;V5L903;V5L8X3;V5JIE7;U5ZA32;U5YWV7;U3L439;U3KW58;T2HM13;T2HKF7;T1Q7E3;T1Q4Y6;R9Y9M1;R9Y9G2;R9Y6E5;R9Y634;R9Y5G0;R9Y4H6;R9Y445;R9Y438;R9Y3X2;R9Y251;R9Y1Y2;R4IBW8;R4IA65;R4I9P2;Q9B2V6;Q9B2V2;Q9B2U9;Q9B1J9;Q8WCY5;Q8WCW6;Q85L1…	A0A059RPW0;C8YAE4;A0A3Q9CRG5;A0A344AJR8;A0A059R5S6;X5D927;X5C9H5;X5BMX5;X5BDH6;W8DJ92;W8D226;W0C7W3;V9N872;V9N3I6;V9JVR4;V9JU54;V9JI12;V9JCG6;V9JAP4;V9J9K8;V9J978;V9J4D6;V9J248;V5L903;V5L8X3;V5JIE7;U5ZA32;U5YWV7;U3L439;U3KW58;T2HM13;T2HKF7;T1Q7E3;T1Q4Y6;R9Y9M1;R9Y9G2;R9Y6E5;R9Y634;R9Y5G0;R9Y4H6;R9Y445;R9Y438;R9Y3X2;R9Y251;R9Y1Y2;R4IBW8;R4IA65;R4I9P2;Q9B2V6;Q9B2V2;Q9B2U9;Q9B1J9;Q8WCY5;Q8WCW6;Q85L1…	Cytochrome c oxidase subunit 1	COX1;coxI;COI;CO1;cox1;MT-CO1			10.4	55.914	0.440933	0.805913	-0.438037	-1.0274	1.32037	0.480733	-2.52228	-2.82013	25.0698	25.8622	25.63	25.6677	24.4399	25.1403	21.6703	24.1996	21.8111
A0A075X871;A0A343GM22;A0A3Q9X1C4;A0A343HGX5;A0A059QTG6;H9E795;A0A343GR13;A0A075X6R4;H9E7H3;H9E7J9;A0A343YS88;A0A3S9JHN0;A0A346M090;Q5Y0G2;Q5Y0J7;Q5Y0H4;Q5Y0F3;Q5Y0E5;Q5Y078;Q5Y070;Q5Y065;Q5Y011;Q5XZY3;Q5XZX9;Q5XZT6;Q5XZR9;Q5XZP7;Q5XZL8;Q5XZK9;Q5XZI9;Q5XZI8;Q5XZI3;Q5XZI2;Q5XZH6;A0A343GTX7;A0A218N9H4;B4YCG0;A0A344AJX0;A0A344AJ99;A0A343LFA6;T1Q6R9;T1Q5Q2;T1Q5P3;T1Q5B9;S4T6M3;Q9B2X0;Q9B2W9;Q9B2U6;Q9B…	A0A075X871;A0A343GM22;A0A3Q9X1C4;A0A343HGX5;A0A059QTG6;H9E795;A0A343GR13;A0A075X6R4;H9E7H3;H9E7J9;A0A343YS88;A0A3S9JHN0;A0A346M090;Q5Y0G2;Q5Y0J7;Q5Y0H4;Q5Y0F3;Q5Y0E5;Q5Y078;Q5Y070;Q5Y065;Q5Y011;Q5XZY3;Q5XZX9;Q5XZT6;Q5XZR9;Q5XZP7;Q5XZL8;Q5XZK9;Q5XZI9;Q5XZI8;Q5XZI3;Q5XZI2;Q5XZH6;A0A343GTX7;A0A218N9H4;B4YCG0;A0A344AJX0;A0A344AJ99;A0A343LFA6;T1Q6R9;T1Q5Q2;T1Q5P3;T1Q5B9;S4T6M3;Q9B2X0;Q9B2W9;Q9B2U6;Q9B…	Cytochrome c oxidase subunit 3	COX3;COIII;CO3;cox3;coxIII;MT-CO3			9.8	16.103	0.0152404	1	0.0252082	0.0459985	1.42512	0.484258	-2.00148	-3.06231	24.8286	25.8728	26.6292	26.0753	25.4995	25.8313	23.9178	24.8318	22.6522
A0A346M047;A0A218N9E7;A0A346M0E0;H9E7F7;H9E7P8;A0A346LZY3;A0A346M077;A0A1B1PEQ8;H9E7W2;H9E7T7;A0A343GQC6;X5C6M5;X5BKA4;X2CK15;X2C841;W8DFH5;W8D4U9;W8D1X2;V9K571;V9JPM6;V9J3S1;U5Z9R9;U5Z487;U3LSI8;T1SWS8;T1Q632;S4STI1;R9Y478;R9Y412;Q9B2U8;Q9B138;Q8WCW3;Q8HNR1;Q85KS0;Q7Y6M3;Q7Y626;Q6VJJ3;Q6VJD8;Q6VIG7;Q6RQ80;Q6RNN7;Q6RKW8;Q6R0V6;Q5SB08;Q5SAP1;Q5S971;Q4GQP0;Q4GHE1;Q4GCZ4;Q4GCG2;Q4F4V6;Q305H0;Q19MP7;…	A0A346M047;A0A218N9E7;A0A346M0E0;H9E7F7;H9E7P8;A0A346LZY3;A0A346M077;A0A1B1PEQ8;H9E7W2;H9E7T7;A0A343GQC6;X5C6M5;X5BKA4;X2CK15;X2C841;W8DFH5;W8D4U9;W8D1X2;V9K571;V9JPM6;V9J3S1;U5Z9R9;U5Z487;U3LSI8;T1SWS8;T1Q632;S4STI1;R9Y478;R9Y412;Q9B2U8;Q9B138;Q8WCW3;Q8HNR1;Q85KS0;Q7Y6M3;Q7Y626;Q6VJJ3;Q6VJD8;Q6VIG7;Q6RQ80;Q6RNN7;Q6RKW8;Q6R0V6;Q5SB08;Q5SAP1;Q5S971;Q4GQP0;Q4GHE1;Q4GCZ4;Q4GCG2;Q4F4V6;Q305H0;Q19MP7;…	Cytochrome c oxidase subunit 2	COX2;COII;MT-CO2;cox2			41.7	16.985	0.0312506	0.993715	-0.0162754	-0.0927382	0.232654	0.860049	-0.141076	-0.592717	25.8446	26.218	26.0484	25.902	25.8636	26.2966	26.0216	26.1208	25.4966
A0A023T6R1;Q96A72;P61326;F5H6N1;F5H6P7;F5H124	A0A023T6R1;Q96A72;P61326;F5H6N1;F5H6P7	Protein mago nashi homolog 2;Protein mago nashi homolog	FLJ10292;MAGOHB;MAGOH			35.8	17.276	0.220723	0.906301	-0.113046	-0.56613	0.19978	0.882123	0.194122	0.518805	25.096	25.2168	25.5107	25.3042	24.8475	25.3326	25.8652	25.4894	24.712
A0A023T787;Q9Y5S9;A0A0J9YW13	A0A023T787;Q9Y5S9;A0A0J9YW13	RNA-binding protein 8A	RBM8;RBM8A			36.8	19.889	0.589561	0.747452	0.169772	1.32002	0.429162	0.773881	0.120644	1.00385	26.5782	26.3521	26.3758	26.4126	26.7813	26.6214	26.7025	26.8309	26.6439
F8WF14;A0A024CIM4;D3DNN4;P06276;H7C4Y0;H0Y885;F8WEX7	F8WF14;A0A024CIM4;D3DNN4;P06276;H7C4Y0;H0Y885;F8WEX7	Carboxylic ester hydrolase;Cholinesterase	BCHE			3.6	63.463	0.324022	0.871014	0.0566432	0.789055	0.118823	0.929546	0.0316658	0.326186	22.935	22.9149	23.022	23.0522	23.1002	22.8894	22.9728	22.9721	23.1919
A0A0C4DFM1;A0A024QYR3;Q92544;B4DH88;B4DKC1;B4DYH6;Q6ZTK5;F8WCN2;F2Z2L1	A0A0C4DFM1;A0A024QYR3;Q92544;B4DH88;B4DKC1;B4DYH6	Transmembrane 9 superfamily member 4	TM9SF4			25.4	72.54	0.190136	0.918942	-0.0584723	-0.496711	0.637476	0.671239	-0.191394	-1.4134	27.6826	28.0006	27.9391	27.9322	27.8115	27.7031	27.405	27.8102	27.6574
A0A024QYR8;Q99805;B3KSG9	A0A024QYR8;Q99805;B3KSG9	Transmembrane 9 superfamily member 2	TM9SF2			11.3	75.775	0.515381	0.779569	-0.287109	-1.17483	0.643273	0.670794	-0.288161	-1.42469	25.5385	25.9093	26.0922	25.9223	25.3485	25.4079	25.1672	25.2009	25.4461
Q96JZ5;A0A024QYS2;Q9HD45;Q5TB53;Q8WUB5;Q8NCC4;B4DN13;Q96K55	Q96JZ5;A0A024QYS2;Q9HD45;Q5TB53;Q8WUB5;Q8NCC4	Transmembrane 9 superfamily member 3	SMBP;TM9SF3			20.2	62.941	0.348948	0.860132	-0.0961361	-0.840835	1.9335	0.357863	-0.217607	-4.40402	27.7113	28.0393	28.0023	27.9168	27.7627	27.7849	27.6096	27.6199	27.5821
A0A2R8YGH5;A0A024QYT6;H7C1E4;P61966	A0A2R8YGH5;A0A024QYT6;H7C1E4;P61966	AP-1 complex subunit sigma-1A	AP1S1			19.7	18.602	0.278502	0.896458	-0.581567	-0.692686	0.314579	0.819462	0.646363	0.769267	24.2667	24.5795	23.7441	24.6774	24.1283	22.0399	23.9562	24.0803	24.7481
B4DVQ5;A1KYQ7;A0A024QYU9;Q99613;B4DVU3;B4DDN4;B5ME19;B4DRU0;B4E2Z6;B3KNZ4;A0A024QYX7;Q3B7B9;H3BPE4;H3BPE3;H3BTY8	B4DVQ5;A1KYQ7;A0A024QYU9;Q99613;B4DVU3;B4DDN4;B5ME19;B4DRU0;B4E2Z6;B3KNZ4;A0A024QYX7	Eukaryotic translation initiation factor 3 subunit C;Eukaryotic translation initiation factor 3 subunit C-like protein	EIF3C;EIF3CL			38	103.64	0.346194	0.857869	-0.057752	-0.835144	1.39423	0.478443	-0.240419	-2.98988	30.0783	30.026	30.0897	30.1055	29.8808	30.0345	29.6848	29.8419	29.7728
B2R7R5;A0A024QYY3;O60256;E7EPA1;C9JJS3;C9K0K7;I3L0S1;C9JDU5;C9JDH0;I3L4G9;E7EW35;I3L331;I3L164;Q6ZTP6	B2R7R5;A0A024QYY3;O60256;E7EPA1;C9JJS3;C9K0K7;I3L0S1	Phosphoribosyl pyrophosphate synthase-associated protein 2	PRPSAP2			38.5	40.883	1.01277	0.55702	0.21814	2.15804	0.362857	0.805447	0.0320892	0.869468	26.3639	26.2667	26.0265	26.4243	26.4628	26.4244	26.4222	26.4489	26.5368
A0A024QYY4;O00512;Q1JQ81	A0A024QYY4;O00512;Q1JQ81	B-cell CLL/lymphoma 9 protein	BCL9			7.2	149.29	0.969538	0.578733	0.449437	2.06971	0.595494	0.684874	-0.228491	-1.3316	24.2616	24.9598	24.6181	25.0083	25.2214	24.9581	25.0272	24.5355	24.9395
A0A024QYZ0;P60059	A0A024QYZ0;P60059	Protein transport protein Sec61 subunit gamma	SEC61G			42.6	7.7412	0.398152	0.831106	0.218659	0.941394	0.592176	0.683673	0.458335	1.32512	23.4707	23.3624	23.7013	23.3123	23.9697	23.9085	24.7386	23.9189	23.9079
A0A024QYZ6;O60645;D6RB59;Q69YP2;D6RBR9;Q6ZNJ2;H0Y995;B2RE06	A0A024QYZ6;O60645;D6RB59;Q69YP2	Exocyst complex component 3	EXOC3;DKFZp762K123			13.2	85.566	0.295128	0.883943	0.100673	0.728182	0.376582	0.802243	-0.145152	-0.897554	24.9308	24.8796	24.7921	24.823	24.8493	25.2321	24.643	24.8715	24.9546
B7ZAR0;A0A024QZ03;O60826;B4DPB6;B4DLA4	B7ZAR0;A0A024QZ03;O60826;B4DPB6;B4DLA4	Coiled-coil domain-containing protein 22	CCDC22			11.7	65.186	0.355735	0.856213	0.114897	0.854828	0.216025	0.868876	-0.119947	-0.555588	23.5694	23.5841	23.8172	23.6251	23.7083	23.982	23.2949	23.9272	23.7335
B3KN29;A0A024QZ22;O60831;A6NP52	B3KN29;A0A024QZ22;O60831;A6NP52	PRA1 family protein 2	PRAF2			33.7	19.29	2.21565	0.333957	-0.460531	-5.30024	0.11904	0.929687	0.0733852	0.326728	26.114	26.3525	26.3827	25.8432	25.7863	25.8381	26.2801	25.903	25.5047
B3KNA1;A0A2R8YDE6;B4DZN1;Q9NSW6;A0A024QZ26;B4DZH6;Q9UBN7;Q9NZS3;A6NDI8;E7EPS2;B4DJ18;B3KVK5;B3KT76;A0A2R8Y758;A0A2R8Y5Z4;A0A2R8YD35;C9J172;Q9BRX7;E7EP63;E7ER52;A0A2R8Y559;B3KMC3	B3KNA1;A0A2R8YDE6;B4DZN1;Q9NSW6;A0A024QZ26;B4DZH6;Q9UBN7;Q9NZS3;A6NDI8;E7EPS2;B4DJ18;B3KVK5;B3KT76	Histone deacetylase 6	DKFZp566E044;HDAC6			6.6	89.748	0.680149	0.692442	0.458073	1.49652	0.662318	0.655479	-0.832134	-1.46178	22.9047	23.7416	23.6668	24.0987	23.6052	23.9834	23.5847	23.6409	21.9653
A0A024QZ30;P31040;D6RFM5;Q0QF12;B4DYN5;B3KT34;A0A087X1I3;A0A494C1T6;B3KYA5;B7Z668;B4DNB2;H0Y8X1	A0A024QZ30;P31040;D6RFM5;Q0QF12;B4DYN5;B3KT34;A0A087X1I3;A0A494C1T6	Succinate dehydrogenase [ubiquinone] flavoprotein subunit, mitochondrial	SDHA			38.7	72.691	0.276067	0.897598	0.0626996	0.687456	1.09271	0.531032	0.182489	2.32405	27.7971	28.0576	28.0009	27.984	28.1038	27.9558	28.2636	28.0689	28.2586
A0A024QZ42;Q53FC3;O75340;H0Y9X3;A0A087WZ38	A0A024QZ42;Q53FC3;O75340	Programmed cell death protein 6	PDCD6			28.1	14.45	0.0133165	1	0.0131963	0.0402765	0.463487	0.757906	0.348495	1.07232	24.1053	24.6788	24.5591	24.8898	23.9423	24.5507	24.4922	24.8636	25.0724
J3KMZ7;B4DQZ5;A0A024QZ48;Q9H0H0	J3KMZ7;B4DQZ5;A0A024QZ48;Q9H0H0	Integrator complex subunit 2	INTS2			3.4	133.38	0.0616602	0.977441	-0.226366	-0.177638	0.318256	0.820871	-1.2383	-0.776984	25.437	24.8474	24.8416	25.1909	22.4719	26.7842	21.6867	24.0934	24.952
A0A024QZ62;Q14254;Q6FG43;J3QLD9;E7EMK3;Q9BTI6;K7EKW9	A0A024QZ62;Q14254;Q6FG43;J3QLD9;E7EMK3;Q9BTI6	Flotillin-2	hCG_1998851;FLOT2			34.8	47.064	0.148033	0.938977	-0.0307325	-0.397703	0.0381611	0.97607	-0.0117791	-0.112454	26.194	26.18	26.1975	26.2464	26.006	26.227	26.0118	26.2504	26.1819
A0A024QZ64;B7Z3K9;P09972;B7Z3K7;B7Z1N6;B7Z1Y2;B7Z1Z9;A8MVZ9;B7Z1L5;J3KSV6;J3QKP5;K7EKH5;C9J8F3;J3QKK1;B7Z1H6	A0A024QZ64;B7Z3K9;P09972;B7Z3K7;B7Z1N6;B7Z1Y2;B7Z1Z9;A8MVZ9;B7Z1L5	Fructose-bisphosphate aldolase;Fructose-bisphosphate aldolase C	ALDOC			40.7	39.455	0.418829	0.813597	0.183008	0.983106	0.143138	0.920681	-0.0531228	-0.385894	26.5933	26.1335	26.2977	26.3077	26.7529	26.513	26.4795	26.3828	26.5519
A0A024QZ70;Q7L7X3	A0A024QZ70;Q7L7X3	Serine/threonine-protein kinase TAO1	TAOK1			9.7	116.07	0.263305	0.900206	-0.091863	-0.659909	0.668694	0.652444	-0.218608	-1.4742	25.685	25.7086	25.8626	25.7892	25.4051	25.7864	25.37	25.3621	25.5927
Q69YM3;A0A024QZ86;Q13207;Q59FT1;F8WCM9;Q53EK5;Q9UL17	Q69YM3;A0A024QZ86;Q13207;Q59FT1	T-box transcription factor TBX2	DKFZp762H2012;TBX2			15.4	68.889	0.408917	0.82292	-0.102476	-0.963145	0.0193657	0.988685	-0.00802485	-0.0581899	26.3555	26.2889	26.295	26.419	26.1129	26.1001	26.0505	26.1945	26.3629
Q8N8L9;Q6PIW8;A0A0A0MS45;J3KNI1;A0A024QZ89;Q9H9E3;A2VCL3;B4DDL2;J3QLW1;E9PRT5;H3BSD2;H3BMV9	Q8N8L9;Q6PIW8;A0A0A0MS45;J3KNI1;A0A024QZ89;Q9H9E3;A2VCL3;B4DDL2	Conserved oligomeric Golgi complex subunit 4	COG4			8.8	78.968	0.0740605	0.973389	-0.0341428	-0.210977	0.421739	0.777635	-0.465139	-0.988953	23.4784	23.2578	23.5109	23.2691	23.2139	23.6617	23.1588	22.0469	23.5436
A0A024QZA9;O14874;H3BTL2;H3BS02;B4DGN9;H3BNP3;H3BUV3	A0A024QZA9;O14874;H3BTL2;H3BS02;B4DGN9	[3-methyl-2-oxobutanoate dehydrogenase [lipoamide]] kinase, mitochondrial	BCKDK			18.2	46.36	0.0649925	0.975693	-0.0424156	-0.186665	1.15635	0.526193	0.452357	2.45898	24.6272	25.1631	24.8025	24.7259	25.1406	24.599	25.4401	25.2169	25.1657
A0A024QZC1;O95400;A0A0S2Z5J7;Q5QTR6	A0A024QZC1;O95400;A0A0S2Z5J7	CD2 antigen cytoplasmic tail-binding protein 2	CD2BP2			24.3	37.646	1.28338	0.512194	0.122697	2.73685	0.322352	0.820381	0.0435136	0.785564	24.192	24.0772	24.1678	24.3072	24.2841	24.2137	24.3633	24.2165	24.3558
G3V203;A0A024QZD1;J3QQ67;Q07020;Q0QEW2;H0YHA7;F8VUA6;F8VYV2;B4DDY5;A0A075B7A0;F8VXR6	G3V203;A0A024QZD1;J3QQ67;Q07020;Q0QEW2;H0YHA7;F8VUA6;F8VYV2;B4DDY5;A0A075B7A0	60S ribosomal protein L18	RPL18			44.5	18.756	1.36828	0.505933	-0.452128	-2.92969	0.0377335	0.976311	0.0568568	0.111242	28.9109	29.3867	29.2891	28.8073	28.6391	28.7838	27.7889	29.2154	29.3965
A8KAQ5;A0A024QZD5;P08621;M0QYR1;M0QX04;B3KPV0;Q9UFS1	A8KAQ5;A0A024QZD5;P08621;M0QYR1	U1 small nuclear ribonucleoprotein 70 kDa	SNRP70;SNRNP70			17.2	51.495	0.0942463	0.966669	0.0666555	0.263863	0.617199	0.685115	-0.478538	-1.3739	25.6617	25.9989	26.0963	26.4031	25.6835	25.8702	25.1358	25.3447	26.0408
H3BSM7;A0A024QZE6;Q96GQ5;B4E381;H3BR29;B4DKB6;H3BTA0;H3BS97;I3L2V0;B4DJP2	H3BSM7;A0A024QZE6;Q96GQ5;B4E381;H3BR29;B4DKB6	RUS1 family protein C16orf58	C16orf58			27.7	50.783	0.182897	0.921355	0.325189	0.479992	0.334359	0.815281	0.246309	0.810605	24.0546	23.4086	21.9957	22.8802	23.7687	23.7855	23.675	23.8327	23.6657
M0QXN5;A0A024QZF1;P37198;M0QX10;M0QYY0;M0QX13;M0QZL5;M0R1S1;M0QX64;M0R302;Q8WYU3	M0QXN5;A0A024QZF1;P37198	Nuclear pore glycoprotein p62	NUP62;hCG_19665			29.4	45.615	0.071405	0.971629	0.0319869	0.203895	0.727471	0.624845	0.147191	1.58884	25.9723	25.5339	25.8215	25.8425	25.9434	25.6378	25.989	25.9126	25.9637
A0A024QZK4;Q96FC7;Q92561;E5RHN5;B4DG21	A0A024QZK4;Q96FC7	Phytanoyl-CoA hydroxylase-interacting protein-like	PHYHIPL			32.2	42.5	1.37778	0.502621	0.123283	2.95166	0.329195	0.816788	0.0970357	0.799854	26.9798	26.893	26.8465	27.057	27.0258	27.0062	26.9334	27.0991	27.3477
B4DG62;A8K7J7;A0A024QZK7;Q59FD4;B3KXY9;P19367;B3KRA9;B1AR63;B1AR62;B3KT70;A8K4Q9;Q2TB90;B4E0J9	B4DG62;A8K7J7;A0A024QZK7;Q59FD4;B3KXY9;P19367;B3KRA9	Hexokinase;Hexokinase-1	HK1			37	102.31	1.10675	0.530493	-0.0465972	-2.35359	0.250822	0.852432	-0.0525932	-0.632727	29.607	29.5732	29.5921	29.5735	29.5139	29.545	29.3738	29.4533	29.6476
A0A024QZK8;P31942;Q53F48;B4DHY1;A0A024QZP1	A0A024QZK8;P31942;Q53F48;B4DHY1;A0A024QZP1	Heterogeneous nuclear ribonucleoprotein H3	HNRPH3;HNRNPH3			42.8	36.926	0.153888	0.936003	0.0890217	0.411741	1.14309	0.519545	-0.460639	-2.43065	27.7292	28.2262	28.3928	28.3572	28.068	28.1901	28.0769	27.6395	27.5169
B4DSN3;A0A024QZM6;P53992;G5EA31;B7ZAY6;B4DQ22;A0A0A0MTR7;A0A0A0MTC1;Q63HN8	B4DSN3;A0A024QZM6;P53992;G5EA31	Protein transport protein Sec24C	SEC24C			24.3	106.56	1.14467	0.528602	0.0612348	2.43402	0.105464	0.936868	0.030695	0.292573	27.1866	27.1784	27.2225	27.2255	27.2483	27.2974	27.0947	27.3234	27.4452
A0A024QZN2;Q8WXX5;Q2VIL4	A0A024QZN2;Q8WXX5	DnaJ homolog subfamily C member 9	hCG_2024613;DNAJC9			35.4	29.909	0.56845	0.7515	0.104472	1.27881	2.24199	0.385	0.376624	5.39056	25.7648	25.5187	25.6502	25.8288	25.7184	25.6999	26.0404	26.1024	26.2341
A0A024QZN4;V9HWK2;P18206;A0A384NYN5;B3KXA2;B4E3Q9;B4DKC9;B4DTM7;A0A096LPE1	A0A024QZN4;V9HWK2;P18206;A0A384NYN5;B3KXA2;B4E3Q9	Vinculin	VCL;HEL114			51	116.72	1.18629	0.537766	0.204312	2.52342	1.01956	0.546241	0.146884	2.17199	29.6499	29.4563	29.5064	29.6308	29.7797	29.8151	29.9285	29.8144	29.9234
A0A024QZN6;Q9ULJ6;F6WR09;D4YW76;B3KR25;E7EWM3;D4YW75;A0A087X127;Q8NF64	A0A024QZN6;Q9ULJ6;F6WR09;D4YW76	Zinc finger MIZ domain-containing protein 1	RAI17;ZMIZ1;TRAFIP10			5.4	116.13	0.0170071	0.999124	0.0065244	0.0512327	0.555912	0.698352	-0.148504	-1.2543	24.8265	25.1063	24.794	24.9659	24.7588	25.0216	24.9401	24.7001	24.6606
A0A024QZN8;Q5GLZ8;A8K9U4	A0A024QZN8;Q5GLZ8;A8K9U4	Probable E3 ubiquitin-protein ligase HERC4	HERC4			7.1	117.7	0.197791	0.914418	0.0552088	0.514266	1.1524	0.520593	0.283049	2.45054	24.4114	24.6418	24.3621	24.655	24.4625	24.4634	24.9287	24.8817	24.6196
A0A024QZP6;Q9P0M6;Q9HA11;Q5SQT3	A0A024QZP6;Q9P0M6;Q9HA11;Q5SQT3	Core histone macro-H2A;Core histone macro-H2A.2;Histone H2A	H2AFY2			43.8	40.058	0.146007	0.938732	-0.0417881	-0.392823	0.537473	0.706065	-0.120358	-1.2182	27.4058	27.4568	27.6371	27.4368	27.3315	27.606	27.2764	27.283	27.4538
A0A024QZP7;Q5H9N4;P06493;A0A024QZJ8;A0A087WZZ9;I6L9I5;E5RIU6;B7Z3D6	A0A024QZP7;Q5H9N4;P06493;A0A024QZJ8;A0A087WZZ9;I6L9I5;E5RIU6	Cyclin-dependent kinase 1	CDC2;DKFZp686L20222;CDK1			57.6	34.081	0.53432	0.766208	0.108714	1.21202	1.93678	0.364901	0.161925	4.41374	28.1656	28.4509	28.3885	28.4204	28.4905	28.4204	28.5516	28.6183	28.6471
Q53FJ5;A0A024QZQ2;C9JIZ6;Q59EN5;P07602;B4DEK5;B4DRB7;Q5BJH1;A0A0J9YXB8	Q53FJ5;A0A024QZQ2;C9JIZ6;Q59EN5;P07602;B4DEK5;B4DRB7;Q5BJH1	Prosaposin;Saposin-A;Saposin-B-Val;Saposin-B;Saposin-C;Saposin-D	PSAP			8.2	58.14	0.164584	0.931475	0.0881157	0.437151	0.577808	0.689484	0.254518	1.29709	22.7051	22.4291	22.7041	22.8381	22.9194	22.3451	23.0705	22.803	22.9927
A0A024QZR5;Q9Y2T2;Q8NDP0;B4DRN6;H0YBM0	A0A024QZR5;Q9Y2T2;Q8NDP0;B4DRN6	AP-3 complex subunit mu-1	AP3M1;DKFZp586G1518			34.4	46.939	0.0990632	0.962455	0.041132	0.276248	0.247637	0.852167	0.097854	0.625751	25.7045	25.5249	25.6603	25.5703	25.9453	25.4975	25.6736	25.9104	25.7227
A0A024QZT0;P45880;A0A0A0MR02;A0A024QZN9;B4DKM5;Q5JSD2;Q5JSD1;A2A3S1	A0A024QZT0;P45880;A0A0A0MR02;A0A024QZN9;B4DKM5;Q5JSD2;Q5JSD1	Voltage-dependent anion-selective channel protein 2	VDAC2			60.5	31.566	1.09082	0.526569	0.352777	2.32008	0.995544	0.55307	0.329365	2.12273	29.4659	29.5786	29.4631	29.6838	30.1483	29.7338	30.2201	30.2462	30.0878
A0A024QZT2;Q96KP1;B3KPN7;B4DZI7;Q2MDF5	A0A024QZT2;Q96KP1;B3KPN7	Exocyst complex component 2	EXOC2			11.6	104.07	0.130052	0.944548	-0.0396442	-0.353985	0.149878	0.911766	-0.0422084	-0.402138	25.2518	25.4925	25.5686	25.5066	25.3817	25.3057	25.3789	25.4938	25.1947
A0A024QZU0;Q13546;B3KU53	A0A024QZU0;Q13546	Receptor-interacting serine/threonine-protein kinase 1	RIPK1			8.8	75.93	2.41154	0.301455	0.37494	6.00248	0.17709	0.894851	-0.0989863	-0.466494	23.956	23.8615	23.7867	24.2526	24.3048	24.1716	24.41	23.7326	24.2894
Q53HG3;Q53GC8;A0A0C4DGA2;A0A024QZU5;O75521;F8WAW4;Q9NYD2;B4DLL3;F1LLU7;C9JB63;Q59E94;Q6IBN4;F8W6J1	Q53HG3;Q53GC8;A0A0C4DGA2;A0A024QZU5;O75521;F8WAW4;Q9NYD2;B4DLL3;F1LLU7;C9JB63;Q59E94;Q6IBN4;F8W6J1	Enoyl-CoA delta isomerase 2, mitochondrial	ECI2;PECI;HCA64			16.5	40.111	0.295475	0.883501	-0.0502173	-0.728919	0.116316	0.931617	0.0429624	0.319924	24.2916	24.089	24.1374	24.0587	24.1547	24.1539	24.0352	24.0346	24.4263
Q9BS45;A0A024QZW0;P51580;Q6I929	Q9BS45;A0A024QZW0;P51580;Q6I929	Thiopurine S-methyltransferase	TPMT;pseudoTPMT			12.7	28.233	0.0637559	0.975579	-0.0162023	-0.183321	0.748987	0.615606	-0.357028	-1.63091	23.8982	23.961	23.7351	23.7527	23.8423	23.9507	23.0739	23.6447	23.756
A0A024QZW3;Q96S59;A0A024R014	A0A024QZW3;Q96S59	Ran-binding protein 9	RANBP9			7.1	77.846	0.25937	0.901457	0.32174	0.651365	0.609075	0.683305	0.284311	1.35807	23.6954	23.4525	22.1443	23.2257	23.6043	23.4274	23.3724	23.7533	23.9847
A0A024QZW7;P49790	A0A024QZW7;P49790	Nuclear pore complex protein Nup153	NUP153			23.2	153.97	0.0714716	0.971796	0.026228	0.204073	0.355601	0.804916	0.119989	0.854553	27.5651	27.4857	27.3735	27.2858	27.6831	27.5341	27.7662	27.4932	27.6036
A0A024QZX3;A0A024QZX5;A0A087X1N8;P35237;A0A2R8YD12;Q8IXH2;A0A2R8Y6A7;A0A024QZT8;A0A2R8YDD0;A0A2R8Y517;C9JTJ8;C9JVA8;H7BXK7;A0A1B0GU38;B2R9H3;A0A024R2B1;P50452	A0A024QZX3;A0A024QZX5;A0A087X1N8;P35237;A0A2R8YD12;Q8IXH2;A0A2R8Y6A7;A0A024QZT8	Serpin B6	SERPINB6			49.2	42.621	0.173184	0.926931	0.0889778	0.45737	1.00682	0.547496	0.240256	2.14583	27.0303	26.4357	26.6349	26.6315	26.9251	26.8113	27.1172	26.8861	27.0853
B2R7M3;A0A024QZY1;Q13155;A8MU58	B2R7M3;A0A024QZY1;Q13155;A8MU58	Aminoacyl tRNA synthase complex-interacting multifunctional protein 2	JTV1;AIMP2			36.2	35.448	0.230421	0.90603	-0.0820306	-0.58776	0.112368	0.932855	-0.045531	-0.310021	26.8201	26.6659	26.6988	26.8356	26.7095	26.3936	26.4968	26.7217	26.5836
B4DZQ5;A0A024QZY5;Q13523;H0YDJ3	B4DZQ5;A0A024QZY5;Q13523;H0YDJ3	Serine/threonine-protein kinase PRP4 homolog	PRPF4B			5.4	115.43	0.464338	0.799704	0.212564	1.07401	0.679987	0.64649	-0.232206	-1.4962	23.9759	23.7218	23.5446	24.1902	23.6695	24.0203	23.7037	23.7039	23.7759
Q0D2M2;B2R4S9;A8K9J7;A0A024RCL8;A0A024RCJ9;A0A024QZZ7;I6L9F7;U3KQK0;B4DR52;Q99880;Q99879;Q99877;Q93079;Q5QNW6;P62807;P58876;P57053;O60814;Q96A08;L0R4T3;A0A2R8Y619	Q0D2M2;B2R4S9;A8K9J7;A0A024RCL8;A0A024RCJ9;A0A024QZZ7;I6L9F7;U3KQK0;B4DR52;Q99880;Q99879;Q99877;Q93079;Q5QNW6;P62807;P58876;P57053;O60814;Q96A08	Histone H2B;Histone H2B type 1-L;Histone H2B type 1-M;Histone H2B type 1-N;Histone H2B type 1-H;Histone H2B type 2-F;Histone H2B type 1-C/E/F/G/I;Histone H2B type 1-D;Histone H2B type F-S;Histone H2B type 1-K;Histone H2B type 1-A	HIST1H2BC;HIST1H2BI;HIST1H2BK;HIST1H2BN;HIST1H2BD;HIST1H2BM;HIST1H2BL;HIST1H2BH;HIST2H2BF;H2BFS;HIST1H2BA			41.3	13.834	0.120194	0.950355	0.0764135	0.329602	0.679433	0.646313	0.338179	1.49512	30.2739	30.1763	29.9743	29.8168	30.5498	30.2871	30.6912	30.4451	30.5319
A0A024R006;Q9UBU6;B4DK49	A0A024R006;Q9UBU6	Protein FAM8A1	FAM8A1			14.8	44.123	1.21925	0.542759	-1.24217	-2.59507	0.362623	0.805655	0.60173	0.868986	22.9883	22.9766	23.2535	20.891	22.2727	22.328	23.1055	22.7559	21.4356
A3KPC7;A0A024RAS2;Q08AJ9;B2R5B3;A4FTV9;A0A024R017;A0A0U1RR32;A0A0U1RRH7;Q99878;Q96KK5;Q9BTM1;Q16777;Q93077;Q7L7L0;Q6FI13;P20671;P0C0S8;P04908;H0YFX9;B4E0B3;B2R5B6;A0A3B3IS11;Q96QV6;P16104;V9GZN0;Q8IUE6	A3KPC7;A0A024RAS2;Q08AJ9;B2R5B3;A4FTV9;A0A024R017;A0A0U1RR32;A0A0U1RRH7;Q99878;Q96KK5;Q9BTM1;Q16777;Q93077;Q7L7L0;Q6FI13;P20671;P0C0S8;P04908;H0YFX9;B4E0B3;B2R5B6;A0A3B3IS11;Q96QV6;P16104	Histone H2A;Histone H2A type 1-J;Histone H2A type 1-H;Histone H2A.J;Histone H2A type 2-C;Histone H2A type 1-C;Histone H2A type 3;Histone H2A type 2-A;Histone H2A type 1-D;Histone H2A type 1;Histone H2A type 1-B/E;Histone H2A type 1-A;Histone H2AX	HIST1H2AH;H2AFJ;HIST1H2AB;HIST1H2AK;HIST1H2AC;HIST1H2AJ;HIST2H2AC;HIST3H2A;HIST2H2AA3;HIST1H2AD;HIST1H2AG;HIST1H2AA;H2AFX			32.8	13.906	0.568998	0.752376	0.302584	1.27988	0.19809	0.883113	0.124109	0.514947	29.5241	29.6602	29.6685	29.6375	30.3796	29.7434	30.1161	29.912	30.1047
A0A024R040;P55809;Q6IAV5;E9PDW2;B7Z609;A1E286;Q9H7N8;B3KS89;Q9BYC2	A0A024R040;P55809;Q6IAV5;E9PDW2;B7Z609	Succinyl-CoA:3-ketoacid-coenzyme A transferase;Succinyl-CoA:3-ketoacid coenzyme A transferase 1, mitochondrial	OXCT1;OXCT			26	56.157	0.102911	0.959475	-0.0202916	-0.286078	0.343806	0.813778	-0.0863457	-0.830204	26.7428	26.7841	26.7443	26.6009	26.7783	26.8311	26.7262	26.4959	26.7291
B2R6K4;A0A024R056;P62873;A0A2L0WW42;F6UT28;Q71UM6;B3KVK2;F6X3N5;B1AKQ8;Q71UM7;F5H8J8;F5H100;F5H0S8;Q59G26;E9PCP0;F1T0G5;F1T0G4;P16520	B2R6K4;A0A024R056;P62873;A0A2L0WW42;F6UT28;Q71UM6;B3KVK2	Guanine nucleotide-binding protein G(I)/G(S)/G(T) subunit beta-1	GNB1			75.3	37.301	0.133005	0.943225	0.0182724	0.36123	0.479446	0.745601	0.0587368	1.10396	29.5988	29.7494	29.6902	29.6672	29.7479	29.6782	29.6922	29.7297	29.8476
A0A024R071;O75694;E9PF10;B4DLT2;B3KMK3;D6RA13	A0A024R071;O75694;E9PF10;B4DLT2	Nuclear pore complex protein Nup155	NUP155			26.1	155.2	0.650698	0.707841	-0.12499	-1.43915	0.00172963	0.999438	-0.000495275	-0.00529963	28.4709	28.6772	28.5685	28.5696	28.3589	28.413	28.3109	28.5342	28.495
A0A024R073;C9IYS7;A0A087WYI0;A0A024R0F2;Q5TA45;J3QRY6;C9J979;Q96HV7	A0A024R073;C9IYS7;A0A087WYI0;A0A024R0F2;Q5TA45;J3QRY6	Integrator complex subunit 11	CPSF3L			10.2	56.012	0.176868	0.927046	-0.0588735	-0.465977	0.743764	0.615677	-0.105734	-1.62069	23.9076	24.2323	23.8439	23.8676	23.9378	24.0018	23.8943	23.8697	23.726
B2RB47;A0A024R098;Q01433;H0Y360;H0YCL9;E9PJF6;E9PIJ1;H0YF16	B2RB47;A0A024R098;Q01433;H0Y360	AMP deaminase 2	AMPD2			23.7	100.72	0.148644	0.939236	-0.0289618	-0.399173	0.00814742	0.994562	-0.0025692	-0.0247835	27.4477	27.5977	27.5722	27.5661	27.3986	27.566	27.3803	27.4678	27.6749
A0A024R0A8;O43865;Q2NKW8;V5YQL4;Q6ZMM9;H0Y8B3;Q6ZNS6;Q96HN2;Q9BTL0;O43210	A0A024R0A8;O43865;Q2NKW8;V5YQL4;Q6ZMM9	Adenosylhomocysteinase;Putative adenosylhomocysteinase 2	AHCYL1;FGFR2-AHCYL1			18.9	58.951	0.235112	0.905203	-0.0357272	-0.598163	0.613417	0.681519	0.0966593	1.36653	24.4909	24.6087	24.5626	24.5826	24.5501	24.4223	24.6776	24.6537	24.5138
Q2TB59;A0A024R0C3;Q13423;E9PCX7;D6RAI5;D6RHU2;B4DS88;B4DMN9;Q8N5H5;H0Y8P5;D6RCR6	Q2TB59;A0A024R0C3;Q13423;E9PCX7	NAD(P) transhydrogenase, mitochondrial	NNT			35.1	113.88	0.237764	0.902531	-0.0437317	-0.604027	0.163413	0.903828	0.0417964	0.434384	29.833	29.8935	29.9368	29.8016	29.7572	29.9732	29.8025	29.8298	30.0252
A0A024R0E2;O75534;Q9GZV0;A0A024R0K2;E9PLT0;Q96L66;Q9UG93;Q8WU01;Q9UG12;E9PNG3;E9PLD4;E9PJK7;E9PKN4	A0A024R0E2;O75534;Q9GZV0;A0A024R0K2;E9PLT0;Q96L66	Cold shock domain-containing protein E1	CSDE1;UNR			49.2	88.884	0.104735	0.956227	0.0184612	0.290721	0.916673	0.58036	-0.149209	-1.9629	29.2042	29.249	29.2328	29.2801	29.1269	29.3344	29.0661	29.0432	29.1845
A0A024R0E5;P52907;A8K0T9	A0A024R0E5;P52907;A8K0T9	F-actin-capping protein subunit alpha-1	CAPZA1			52.8	32.922	0.602617	0.736519	0.150832	1.34548	0.460975	0.758382	0.106968	1.06733	26.8946	26.7681	27.0177	26.8736	27.1466	27.1127	27.056	27.1643	27.2334
H0Y612;A0A024R0F6;Q9UPN9;B3KN30	H0Y612;A0A024R0F6;Q9UPN9	E3 ubiquitin-protein ligase TRIM33	TRIM33			5.3	98.891	0.0253193	0.99551	-0.0118612	-0.0756005	0.608585	0.683792	-0.16836	-1.35712	23.9308	23.5266	23.7865	23.8936	23.542	23.7726	23.5851	23.4405	23.6776
A0A024R0G0;Q96S66;A0A024R095;Q5T1P5;B3KQX4	A0A024R0G0;Q96S66;A0A024R095	Chloride channel CLIC-like protein 1	CLCC1			31.2	62.022	0.347456	0.859899	-0.141289	-0.837753	0.946544	0.569503	-0.174216	-2.02309	27.2444	27.6655	27.7461	27.4866	27.2811	27.4644	27.2415	27.1365	27.3315
B4DKS0;A0A024R0H1;P53985;B4E106;B2R6A5;Q5T8R3;Q5T8R5;Q5T8R4	B4DKS0;A0A024R0H1;P53985;B4E106;B2R6A5	Monocarboxylate transporter 1	SLC16A1			13.1	51.836	0.368013	0.850582	-0.103545	-0.880038	0.445627	0.763733	-0.219173	-1.03677	27.0733	27.1981	27.3856	27.1719	26.9671	27.2073	26.5051	27.0419	27.1418
A0A024R0H6;Q8N7H5;B4DGJ5	A0A024R0H6;Q8N7H5;B4DGJ5	RNA polymerase II-associated factor 1 homolog	PAF1			15.4	59.975	0.386691	0.836144	-0.832493	-0.918144	0.313065	0.819447	0.695721	0.766085	23.8025	23.7496	23.7222	23.7387	21.1159	23.9223	23.5093	23.6687	23.686
A0A024R0H7;Q9BQA1;H0Y711;B4DJP0	A0A024R0H7;Q9BQA1;H0Y711	Methylosome protein 50	WDR77			32.2	36.724	0.164844	0.93255	0.0590731	0.437766	0.459816	0.756213	0.169689	1.06502	25.5264	25.9178	25.6656	25.6574	25.8985	25.7311	25.6511	26.0312	26.1138
A0A024R0J9;A0A0A0MRA5;B7Z4B8;A8K6U7;Q9BUJ2;A8K3W4;A8K5K0;M0R3F1;M0QYZ0;M0QYI8;B3KM60;M0R203;M0QZV6;M0R0K8;M0QYM5	A0A024R0J9;A0A0A0MRA5;B7Z4B8;A8K6U7;Q9BUJ2;A8K3W4;A8K5K0;M0R3F1;M0QYZ0	Heterogeneous nuclear ribonucleoprotein U-like protein 1	HNRPUL1;HNRNPUL1			28.2	84.793	1.08259	0.528749	-0.300236	-2.30282	0.560571	0.693181	0.170787	1.26341	27.0249	26.9139	26.938	26.9104	26.5392	26.5263	26.8671	26.7321	26.8891
Q59EI3;B2R8A9;A0A024R0K3;Q6ZSA3;F5H5P2;P12694;Q658P7;H0YH31;F5GXU9;Q9UMB3	Q59EI3;B2R8A9;A0A024R0K3;Q6ZSA3;F5H5P2;P12694;Q658P7	2-oxoisovalerate dehydrogenase subunit alpha, mitochondrial	BCKDHA;DKFZp313C0640			21.6	50.399	0.0306278	0.994445	0.0346807	0.0909482	0.566579	0.691321	-1.02243	-1.27516	25.0567	25.8111	25.6793	25.9304	24.9535	25.7672	25.5541	24.9449	23.0848
A0A024R0L2;Q96F63	A0A024R0L2;Q96F63	Coiled-coil domain-containing protein 97	MGC20255;CCDC97			20.7	44.753	0.475836	0.79459	0.216413	1.09681	0.365629	0.80785	-0.126514	-0.875152	24.1942	24.2891	23.787	24.459	24.0623	24.3981	24.3193	24.1604	24.0603
A0A024R0L5;P49840;Q68D16;A8MT37;M0QYV0	A0A024R0L5;P49840;Q68D16;A8MT37	Glycogen synthase kinase-3 alpha	GSK3A;DKFZp686D0638			17	50.98	0.265538	0.899541	0.107079	0.664746	0.839225	0.6018	-0.284081	-1.80848	24.1429	24.0846	24.574	24.4192	24.4215	24.2821	24.2608	24.2189	23.7908
A0A024R0L6;Q15102;M0R389;M0R1K3;M0QZT2;M0QXS6;M0R323	A0A024R0L6;Q15102;M0R389	Platelet-activating factor acetylhydrolase IB subunit gamma	PAFAH1B3			34.2	25.734	0.423401	0.812096	0.132687	0.992291	0.600271	0.686218	0.197529	1.34091	27.0903	27.1229	27.0196	27.1668	27.4543	27.0097	27.293	27.3992	27.5313
Q0VAB1;A0A024R0M6;Q3ZCQ8;M0R0C3;M0R2F8;M0R1Y4;M0R003;M0QXC3;M0R2Z3;M0R303;M0R2D2;M0R047;M0R2Q2	Q0VAB1;A0A024R0M6;Q3ZCQ8	Mitochondrial import inner membrane translocase subunit TIM50	TIMM50			20.8	50.478	0.68347	0.692833	-0.178321	-1.50299	0.508589	0.724621	-0.279552	-1.16147	25.1653	25.2304	25.3674	25.027	24.928	25.2732	24.9905	25.0371	24.3619
A0A024R0Q4;Q8IV08;B4DEL6;M0R1F7;M0R2W7;E2QRG1	A0A024R0Q4;Q8IV08;B4DEL6;M0R1F7	Phospholipase D3	PLD3			13.3	54.705	0.488599	0.788674	-0.0761	-1.12206	0.241009	0.855998	-0.0753803	-0.611185	26.663	26.6765	26.5466	26.5916	26.4462	26.62	26.5315	26.2637	26.6364
A0A024R0Q7;P53041;Q53FR0;B2R6R6;B4DLP6;H0YDU8;B4DDZ8;A8MU39;Q59F46;B7Z1I1	A0A024R0Q7;P53041;Q53FR0;B2R6R6;B4DLP6;H0YDU8;B4DDZ8;A8MU39	Serine/threonine-protein phosphatase;Serine/threonine-protein phosphatase 5	PPP5C			38.9	56.878	0.823757	0.636612	0.125451	1.77789	0.252283	0.852153	0.065136	0.635921	27.4329	27.3861	27.4778	27.429	27.6422	27.6019	27.765	27.4927	27.6108
A0A024R0R1;M0QZR4;Q92888;A0A2X0SFA4;Q8NF33;M0QYC1;M0R2C7;Q49AN3;M0QYS3;M0QXV6;M0R3H5;M0QZH8	A0A024R0R1;M0QZR4;Q92888;A0A2X0SFA4	Rho guanine nucleotide exchange factor 1	ARHGEF1			21.3	102.43	0.266483	0.898881	0.0490208	0.666791	0.0423987	0.97425	0.00953356	0.124416	25.892	25.8366	25.8923	25.7816	26.0094	25.977	25.9667	25.8758	25.9542
A0A024R0R4;Q9UBE0;M0QZS6;B3KNJ4;M0QX65;B4DY66;M0R054;M0R375;M0R286;M0QYM8	A0A024R0R4;Q9UBE0;M0QZS6;B3KNJ4;M0QX65	SUMO-activating enzyme subunit 1;SUMO-activating enzyme subunit 1, N-terminally processed	SAE1			43.9	38.449	0.380285	0.841196	0.0812778	0.905107	1.14158	0.519337	0.150634	2.42743	27.2326	27.1034	26.9513	27.1072	27.1855	27.2385	27.2563	27.3053	27.4214
B7Z6F7;A0A024R0R6;Q92797;A0A087WUE9;Q4LE61;M0R3C7;M0QXP5;M0R1C2;O75402;M0R180;M0R039;M0R033	B7Z6F7;A0A024R0R6;Q92797;A0A087WUE9;Q4LE61	Symplekin	SYMPK;SYMPK variant protein			26.9	141.13	0.346604	0.859904	-0.0211067	-0.835991	0.0671308	0.9601	-0.00453059	-0.192431	27.8796	27.8574	27.8218	27.7974	27.8361	27.8621	27.799	27.8404	27.8425
M0R0Y2;A0A024R0R9;P54920;M0R2M1;M0R213;M0R027;A0A024R0V6;M0R058;M0QZM9;M0QZN5;M0R031;M0R0I4;B4DGP9;B4DIV0;A0A087WZQ7;Q9H115	M0R0Y2;A0A024R0R9;P54920;M0R2M1	Alpha-soluble NSF attachment protein	NAPA			44.5	29.163	0.272214	0.8979	0.0604515	0.679165	0.0775944	0.954784	0.0242469	0.220356	25.895	25.7248	25.7428	25.7101	25.8893	25.9446	26.0079	25.7178	25.891
F5H8D7;A0A024R0S8;Q59HH7;P18887;B4DEB2;B4DTD3;M0QYS5;B2RCY5;V9VB20;M4WFF9;M0QZ96;M0R0D2;M0R1U8	F5H8D7;A0A024R0S8;Q59HH7;P18887;B4DEB2;B4DTD3;M0QYS5;B2RCY5	DNA repair protein XRCC1	XRCC1			8.1	66.013	0.237651	0.901862	0.11176	0.603777	0.246671	0.852219	0.174928	0.623633	23.9401	23.979	24.1696	23.826	24.4136	24.1844	23.9964	24.2087	24.7438
A0A0S2Z4I9;A0A0S2Z4N8;A0A024R0V4;P50552;K7ENR7;K7ENL7;A0A0S2Z4H6;K7EM16;A0A0S2Z4I7;K7EIG8	A0A0S2Z4I9;A0A0S2Z4N8;A0A024R0V4;P50552;K7ENR7;K7ENL7;A0A0S2Z4H6;K7EM16;A0A0S2Z4I7	Vasodilator-stimulated phosphoprotein	VASP			18.7	35.299	0.642468	0.710526	0.80533	1.42312	0.365197	0.806547	-0.515837	-0.874268	23.5773	23.6652	21.9285	23.9046	23.793	23.8894	23.9002	23.9701	22.1692
A0A024R0Y5;A0A2R8Y891;P08237;A0A0S2Z4A1;B4E162;Q96I60;A0A0S2Z4I1;F8VZI0;Q7KYX9;A0A0S2Z4A8;F8VP00;P78457;Q7Z683;F8VX13;F8VNX2;F8VZQ1;F8VW30;F8VSL1;H0YHB8;F8W1J8;F8VSF7;F8VTQ3;F8VUB8;F8VYK8;F8VVE3	A0A024R0Y5;A0A2R8Y891;P08237;A0A0S2Z4A1;B4E162;Q96I60;A0A0S2Z4I1;F8VZI0;Q7KYX9;A0A0S2Z4A8	ATP-dependent 6-phosphofructokinase;ATP-dependent 6-phosphofructokinase, muscle type	PFKM			35.5	85.182	0.00784642	0.9989	0.00150998	0.0238759	0.917169	0.580427	0.139617	1.9639	28.0052	27.8335	27.8069	27.8599	27.895	27.8953	27.9393	27.9674	28.1623
A0A024R3Q3;A0A024R0Y6;P84077;P61204;F5H423;B4DJC8;B4DN70;F5H0C7;B4E190;B4DEB9;H0YGG7	A0A024R3Q3;A0A024R0Y6;P84077;P61204;F5H423;B4DJC8;B4DN70;F5H0C7;B4E190;B4DEB9	ADP-ribosylation factor 1;ADP-ribosylation factor 3	ARF1;ARF3			60.2	20.697	0.846454	0.630336	0.172711	1.82281	0.210353	0.872347	0.108096	0.542804	27.9068	27.8366	27.8026	28.1689	28.0359	27.8594	28.4661	28.0605	27.8618
B3KY11;A8KA56;A0A024R0Z3;Q9BUQ8;H0YI52;F8VVA2;H0YIL9	B3KY11;A8KA56;A0A024R0Z3;Q9BUQ8	Probable ATP-dependent RNA helicase DDX23	DDX23			27.5	93.233	0.0900006	0.970338	-0.0158755	-0.252874	0.159724	0.904926	0.0468858	0.425643	27.8201	27.8633	27.7141	27.743	27.7348	27.8721	27.673	27.7995	28.018
A0A024R101;Q86XZ4;F8VS10	A0A024R101;Q86XZ4;F8VS10	Spermatogenesis-associated serine-rich protein 2	SPATS2			12.3	59.544	0.0673856	0.973455	-0.0363248	-0.193116	0.570323	0.689478	-0.353046	-1.28247	23.2489	23.4381	23.425	22.985	23.5678	23.4502	23.1919	22.5612	23.1908
A0A024R102;Q96GM5;A0A024R137;A8K9I5;F8VRQ4;B4DF50;F8VUB0;F8VZ70;F8VW95;H0YHV1;C9JYI7	A0A024R102;Q96GM5;A0A024R137;A8K9I5;F8VRQ4;B4DF50;F8VUB0	SWI/SNF-related matrix-associated actin-dependent regulator of chromatin subfamily D member 1	SMARCD1			49	70.961	0.338333	0.861817	-0.0737203	-0.81886	0.0651214	0.961697	0.0149568	0.187013	29.2988	29.5312	29.4692	29.4718	29.2841	29.3222	29.2666	29.4537	29.4026
H0YI09;A0A024R118;Q9H8H3;F8VQX6;B4DDW1	H0YI09;A0A024R118;Q9H8H3;F8VQX6;B4DDW1	Methyltransferase-like protein 7A	METTL7A			40.2	28.188	0.812228	0.644986	-0.316662	-1.75514	0.207236	0.875654	0.0730928	0.535753	27.9631	28.2925	28.4072	28.1343	27.8585	27.7199	27.9591	27.8812	28.0917
A0A024R120;Q12800;F8VWL0;F8VX55;C9JWL3	A0A024R120;Q12800;F8VWL0;F8VX55	Alpha-globin transcription factor CP2	TFCP2			18.3	57.255	0.948236	0.587625	-1.81138	-2.02652	0.736243	0.61987	1.56462	1.60598	24.5682	24.5468	24.3549	24.393	22.2439	21.3988	23.4714	24.762	24.4962
A0A024R125;P54619;F8VYY9;F8W046;H0YHF8;B4E094;A0A494C068;E9PGP6;B7Z6X8;A0A494C123;A0A494C1K7;A0A384MDZ2;A0A090N8Q6;Q9UGJ0	A0A024R125;P54619;F8VYY9	5-AMP-activated protein kinase subunit gamma-1	PRKAG1			16.3	37.579	0.129079	0.943791	-0.0721658	-0.35159	0.280915	0.839858	-0.429327	-0.697861	23.8138	23.7048	23.8193	23.3071	23.9539	23.8604	22.1166	23.8141	23.9027
B2RE34;A0A024R136;A0A2X0U4T9;Q9H0H5;F8VRD2;F8VYH6;F8VQZ5;F8VWX0;F8W0L1;F8VZ66;F8VV37;F8VV47;F8W1E5;F8VWY4;F8VVE5;Q9H9L9;H0YIK5;F8VQF5;F8VUW9;F8VV39;F8VZ41;F8VS54;F8W1T4;Q9BZ74	B2RE34;A0A024R136;A0A2X0U4T9;Q9H0H5;F8VRD2	Rac GTPase-activating protein 1	RACGAP1			13.9	70.968	0.0426098	0.989109	0.00881195	0.12501	0.456115	0.760268	-0.113031	-1.05766	24.5753	24.7866	24.6155	24.6969	24.6124	24.6946	24.6177	24.6938	24.3533
B7ZLZ7;B3KMB1;A8K984;A0A024R158;O95347;Q05BV1;Q2KQ72;B3KM27;Q6IPS5;A0JLM9;A0A0C4DGE5;Q05D74;Q32Q15;Q7Z2X1;Q6P712;Q5T821;Q13497	B7ZLZ7;B3KMB1;A8K984;A0A024R158;O95347;Q05BV1;Q2KQ72	Structural maintenance of chromosomes protein;Structural maintenance of chromosomes protein 2	SMC2;SMC2L1			38.5	135.7	0.256777	0.899486	-0.0427354	-0.645724	0.11725	0.931291	-0.0194289	-0.32226	28.9159	28.8027	28.7421	28.8615	28.7432	28.7277	28.6743	28.7829	28.817
B2R923;A0A024R159;Q6YN16;B4DWC7;B4E136	B2R923;A0A024R159;Q6YN16;B4DWC7;B4E136	Hydroxysteroid dehydrogenase-like protein 2	HSDL2			13.9	37.306	0.101037	0.959583	0.0783997	0.281298	0.69249	0.642945	-0.460645	-1.52057	24.8505	24.0219	24.0346	24.46	24.2871	24.3953	24.3894	24.0057	23.3653
A0A024R169;Q9NXF1;B4DQR0;B7Z9D5;A0A0A0MSR3;B4E149	A0A024R169;Q9NXF1;B4DQR0	Testis-expressed sequence 10 protein	TEX10			23.6	105.67	0.0100433	0.99749	-0.00306384	-0.0304861	0.72531	0.621859	-0.183733	-1.58462	26.6051	26.7904	26.7261	26.7204	26.5503	26.8418	26.4421	26.6791	26.44
A0A024R179;Q09161;X6R941;F2Z2T1	A0A024R179;Q09161	Nuclear cap-binding protein subunit 1	NCBP1			26.7	91.838	0.151749	0.936439	0.0358556	0.406625	0.371515	0.804692	0.0972036	0.887203	27.6214	27.915	27.8027	27.8559	27.8081	27.7827	27.7216	27.9233	28.0934
A0A024R1A3;P22314;B4DDE4;B4DL67;Q5JRR6;B3KUJ2;Q5JRR9;Q5JRS0;Q5JRS2;Q5JRS1;Q5JRS3;Q8WY81	A0A024R1A3;P22314;B4DDE4	Ubiquitin-like modifier-activating enzyme 1	UBE1;UBA1			52.6	117.85	0.243141	0.905086	0.03077	0.615877	0.892283	0.587424	0.0708644	1.91403	31.3205	31.1832	31.2341	31.3235	31.2212	31.2854	31.3148	31.3387	31.3892
F8WCP5;A0A024R1D6;Q13769;C9JXG5;H7C441;H7C072;C9JXU6;F5GZF3;C9JCL9	F8WCP5;A0A024R1D6;Q13769;C9JXG5;H7C441;H7C072	THO complex subunit 5 homolog	THOC5;hCG_2011153			19	39.732	0.326288	0.870076	-0.111821	-0.793789	0.658492	0.657927	-0.16066	-1.45433	25.5591	25.2796	25.0945	25.279	25.1515	25.1673	25.1396	25.1434	24.8327
B7ZAT0;K9MRS9;A0A024R1E6;P78395;A0A0G2JRX7;E7EMH2;H7C2P3;E7EW99;B7Z986;B7Z7K8;K9MSY5;B5MCY4;B5MD04;A0A0G2JRX8	B7ZAT0;K9MRS9;A0A024R1E6;P78395;A0A0G2JRX7;E7EMH2;H7C2P3;E7EW99;B7Z986;B7Z7K8;K9MSY5;B5MCY4	Melanoma antigen preferentially expressed in tumors	PRAME			9.9	55.883	0.482618	0.791769	-0.209834	-1.11023	0.211607	0.872064	-0.105474	-0.545636	24.6336	24.4276	24.4558	24.6389	24.0441	24.2045	24.3266	24.0632	24.1812
Q9HD72;A8K6Y8;A0A024R1H7;A0A024R1F8;Q59HH1;A0A024R1M5;Q9HBE1	Q9HD72;A8K6Y8;A0A024R1H7;A0A024R1F8;Q59HH1;A0A024R1M5;Q9HBE1	POZ-, AT hook-, and zinc finger-containing protein 1	ZNF278;PATZ1			12.3	45.257	0.170464	0.927299	0.183704	0.450996	0.646628	0.668118	-0.612115	-1.43122	22.0785	23.2996	23.2757	23.182	22.9873	23.0357	22.7141	23.0262	21.6283
Q8N523;A0A024R1I7;Q9UBB9;B4DPE5;B4DSX8;H0Y4U8;B1AHQ3	Q8N523;A0A024R1I7;Q9UBB9;B4DPE5;B4DSX8	Tuftelin-interacting protein 11	TFIP11			18	96.793	0.405261	0.822591	-0.18039	-0.955767	0.0204233	0.989814	0.0109049	0.0612982	26.0221	26.4693	26.3825	26.3688	26.0094	25.9545	26.3194	26.1456	25.9005
A0A024R1K7;Q04917;Q9H4N8;B2R6N6;A2IDB2;F8WEB6;A2IDB1	A0A024R1K7;Q04917;Q9H4N8;B2R6N6;A2IDB2	14-3-3 protein eta	YWHAH			56.5	28.218	0.673909	0.69309	0.181188	1.48436	0.598159	0.683855	0.1286	1.33679	27.9623	27.681	27.7972	27.8385	28.1529	27.9927	28.1789	28.0687	28.1223
A0A024R1K8;Q15459;B4E091;H7C1L2;F8WB66;F8WC79	A0A024R1K8;Q15459;B4E091	Splicing factor 3A subunit 1	SF3A1			36.6	88.885	0.551115	0.757311	0.123382	1.24492	1.36749	0.470927	0.140303	2.92786	28.1627	27.8246	28.0331	28.1086	28.138	28.1439	28.343	28.1834	28.2851
A0A024R1N1;P35579;Q86XU5;B4E3S1;Q6ZNL4;Q99529;Q5BKV1;B1AH99;Q2PS10;Q7Z7R0;A0A0C4DFM8;O14729;O14794;Q9UMJ0;A8CLL2;Q68D89;A0A2R8Y4C3;Q66K75;B4E177;A1L2Z2;B4DFX9;REV__B4DQZ7;REV__S4R3H4;REV__E7EQT4;REV__Q9UKV3;Q59EV3;A0A087X0T3;A7E2Y1	A0A024R1N1;P35579;Q86XU5	Myosin-9	MYH9			58.8	226.53	0.921258	0.60213	-0.164568	-1.97212	1.43608	0.47882	-0.283234	-3.08824	31.6679	31.6873	31.5867	31.5637	31.3277	31.5567	31.1086	31.2766	31.2133
A0A024R1N4;P12956;B2RDN9;B1AHC9;B4DE32;B4E356;Q6IC76	A0A024R1N4;P12956;B2RDN9;B1AHC9;B4DE32;B4E356	X-ray repair cross-complementing protein 6	XRCC6			50.9	69.842	0.201578	0.913167	0.0308399	0.522902	0.882798	0.582075	0.103193	1.89509	29.6578	29.4642	29.6169	29.6073	29.6166	29.6075	29.8173	29.6333	29.6903
A0A024R1Q3;Q9NSP4;B1AHQ7;B1AHQ6	A0A024R1Q3;Q9NSP4;B1AHQ7;B1AHQ6	Centromere protein M	C22orf18;CENPM			10.6	19.737	1.60102	0.440336	-0.966047	-3.49277	NaN	1	0	NaN	22.9765	23.5744	22.937	22.292	22.4573	21.8404	23.0618	22.796	22.3754
Q9BTQ7;A0A024R1Q8;P62829;C9JD32;J3KT29;B9ZVP7;J3KTJ3;J3QQT9;A4D142	Q9BTQ7;A0A024R1Q8;P62829;C9JD32;J3KT29;B9ZVP7	60S ribosomal protein L23	RPL23			64.2	14.149	1.01611	0.555937	-0.277468	-2.1649	0.287084	0.839397	-0.085097	-0.711054	29.4186	29.5168	29.6301	29.3864	29.0219	29.3249	29.1638	29.0872	29.2269
A0A024R1S5;O00178;B2RDW9;B0QY59	A0A024R1S5;O00178;B2RDW9	GTP-binding protein 1	GTPBP1			10.6	71.463	0.251927	0.901888	0.039067	0.635142	1.48805	0.478907	0.174042	3.21272	24.8861	24.8325	24.7768	24.7656	24.9309	24.9161	25.0667	25.0247	25.0432
A0A2R8Y765;J3QKS7;A0A2R8Y7U4;A0A2U3TZQ7;A0A2R8Y7I9;A0A2R8Y4T4;A0A2R8YES3;A0A2R8Y855;B4DGM3;A0A024R1S7;Q969G3;J3QR61;K7EMQ8;H7C048;A0A2R8YFC8;A0A2R8YEB8;J3KT85;A0A2R8YD78;J3QKX6;C0IMW8	A0A2R8Y765;J3QKS7;A0A2R8Y7U4;A0A2U3TZQ7;A0A2R8Y7I9;A0A2R8Y4T4;A0A2R8YES3;A0A2R8Y855;B4DGM3;A0A024R1S7;Q969G3;J3QR61;K7EMQ8	SWI/SNF-related matrix-associated actin-dependent regulator of chromatin subfamily E member 1	SMARCE1			26	32.319	0.39078	0.8393	-0.620451	-0.926451	0.605771	0.683287	0.896585	1.35163	24.2947	24.3962	24.0195	22.3373	23.972	24.5397	24.4087	24.499	24.6312
A0A024R1S8;Q14847;A8K1D2;C9J9W2;B4DIC4;B4DJI4;F6S2S5;Q9NPR7;K7ESD6	A0A024R1S8;Q14847;A8K1D2;C9J9W2;B4DIC4;B4DJI4	LIM and SH3 domain protein 1	LASP1			37.2	29.717	0.989314	0.568635	0.456705	2.10999	0.214545	0.870635	0.118193	0.552259	26.2355	25.895	26.0155	26.1462	26.8033	26.5667	26.8121	26.5272	26.5314
A0A024R1T5;P09543;B4DFN6;B4DI06;K7ERC4;K7EN66;C9K0L8;K7ERZ0	A0A024R1T5;P09543;B4DFN6;B4DI06	2,3-cyclic-nucleotide 3-phosphodiesterase	CNP			23.9	45.098	0.699504	0.675288	0.123423	1.53425	0.218437	0.866517	-0.0730654	-0.561005	26.2303	26.2285	26.3604	26.2637	26.4414	26.4844	26.2127	26.2114	26.5461
A0A024R1Y2;A0A024R1T9;Q4LE36;P53396;Q8N9C4;K7ESG8;K7EIE7	A0A024R1Y2;A0A024R1T9;Q4LE36;P53396;Q8N9C4	ATP-citrate synthase	ACLY;ACLY variant protein			45.2	119.77	0.0303857	0.993848	0.00561714	0.0902516	0.336549	0.813404	0.084142	0.815157	30.6304	30.8211	30.753	30.7502	30.6886	30.7827	30.6518	30.8257	30.9964
A0A024R1U0;P46060;B4DY16;B4E0U0;H0Y4Q3;Q9BSK3;B0QYT5;B0QYT4;B0QYT6	A0A024R1U0;P46060;B4DY16;B4E0U0	Ran GTPase-activating protein 1	RANGAP1			28.8	63.541	1.17736	0.523758	0.177083	2.50414	0.122711	0.92591	0.0179609	0.335857	27.0797	26.8702	26.9518	27.0735	27.1704	27.1891	27.1998	27.0829	27.2042
A0A024R1U2;Q7RTV0	A0A024R1U2;Q7RTV0	PHD finger-like domain-containing protein 5A	PHF5A			32.7	12.405	0.919415	0.603825	2.33849	1.96841	0.0631456	0.960814	-0.0256519	-0.181668	22.0002	21.5828	25.3246	25.5049	25.233	25.1852	25.1561	25.2101	25.4799
A0A024R1U4;P51148;K7ENY4;K7ERI8;K7ERQ8;F8VVK3;F8VVZ0;F8VUA5;A0A024RB09;P61020;F8VWU4;Q6FI54;F8WCY6;F8WD79;F8VPW9;F8VSF8;F8VWZ7	A0A024R1U4;P51148;K7ENY4;K7ERI8;K7ERQ8;F8VVK3	Ras-related protein Rab-5C	RAB5C			48.1	23.482	0.079137	0.971362	-0.0264263	-0.224433	0.401319	0.79057	0.101966	0.947802	26.0164	25.9915	26.3032	26.0015	26.2005	26.0297	26.3451	26.1463	26.0463
E4W6B6;B2R4D8;A0A024R1V4;P61353;K7ELC7;K7EQQ9;K7ERY7;Q6LCU2	E4W6B6;B2R4D8;A0A024R1V4;P61353;K7ELC7	60S ribosomal protein L27	RPL27			48.4	14.257	0.012738	0.998242	-0.00332959	-0.038551	0.0238544	0.988713	0.0051651	0.0713363	27.3243	27.5919	27.4192	27.4684	27.3699	27.4872	27.3553	27.4189	27.5667
A0A0S2Z487;A0A024R1X8;P14923;A0A0S2Z495;Q7KZ86	A0A0S2Z487;A0A024R1X8;P14923	Junction plakoglobin	JUP			28.5	81.744	1.02754	0.549913	-0.449466	-2.18843	0.784551	0.604038	0.32096	1.70066	27.1789	26.7035	27.2314	26.7323	26.6791	26.354	27.1996	26.8064	26.7223
A0A024R1Z6;Q99536;B3KUF8;K7ESA3;K7ERT7;K7ENX2;K7EM19;K7EJM4;K7ER81;Q16464	A0A024R1Z6;Q99536;B3KUF8	Synaptic vesicle membrane protein VAT-1 homolog	VAT1			30.8	41.92	0.149588	0.93799	0.0205816	0.401442	0.87566	0.588288	-0.167092	-1.88085	26.2797	26.4181	26.4309	26.3918	26.4283	26.3704	26.0648	26.263	26.3614
A0A024R201;B4DJ66;Q53GN6;B2RBM7;Q9UNM6;Q9Y6E3;J3KNQ3;A0A087WUL9;H0YD73;E9PL38;Q9UNM7;Q5HYL3;E9PQG3	A0A024R201;B4DJ66;Q53GN6;B2RBM7;Q9UNM6;Q9Y6E3;J3KNQ3;A0A087WUL9;H0YD73;E9PL38	26S proteasome non-ATPase regulatory subunit 13	PSMD13			54.3	42.918	0.0238398	0.996912	0.00526365	0.0712936	0.434618	0.769957	0.0618432	1.01477	28.767	28.5416	28.5722	28.6465	28.6604	28.5897	28.5876	28.712	28.7825
V9HWJ8;A0A024R203;P61289;K9J957;Q6FHK7;J7FRP4;A0A087WTV2;K7ENH2;B3KQ25;K7ESG5;K7EMD0;K7EPX6;K7EKR3;B7Z8D3	V9HWJ8;A0A024R203;P61289;K9J957;Q6FHK7;J7FRP4;A0A087WTV2;K7ENH2;B3KQ25;K7ESG5	Proteasome activator complex subunit 3	HEL-S-283;PSME3			28	29.506	0.202784	0.912613	-0.0910867	-0.525648	0.403778	0.788845	0.11825	0.952772	25.9967	25.4685	25.797	25.8204	25.5654	25.6031	25.7679	25.9526	25.6232
A0A024R222;B4DHQ3;Q9Y617;A0A024R280;B4DHX7;A9LS35	A0A024R222;B4DHQ3;Q9Y617;A0A024R280	Phosphoserine aminotransferase	PSAT1			49.5	40.422	1.40433	0.50132	0.163485	3.01347	0.0628176	0.960672	0.0107543	0.180779	27.8491	27.8092	27.8568	27.9422	28.1059	27.9574	28.0363	27.9558	28.0457
A0A024R223;A0A024R238;Q96RL7;B3KW31;H0Y7P8	A0A024R223;A0A024R238;Q96RL7	Vacuolar protein sorting-associated protein 13A	VPS13A			7	339.18	0.463687	0.800446	-0.167196	-1.07272	0.306426	0.823903	-0.166354	-0.752101	25.6936	26.0183	25.9744	25.9484	25.544	25.6923	25.1882	25.735	25.7624
A0A024R228;P61978;Q5EC54;B4DFF1;B3KU16;S4R457;S4R359	A0A024R228;P61978;Q5EC54;B4DFF1	Heterogeneous nuclear ribonucleoprotein K	HNRPK;HNRNPK			62.2	51.218	0.0580928	0.977833	0.0122185	0.167917	0.134676	0.923193	-0.0231349	-0.365319	31.305	31.3668	31.5168	31.3796	31.3645	31.4812	31.4722	31.3902	31.2935
A0A3B3ISZ5;B7Z954;A0A3B3IRI3;A0A024R233;A0A3B3ITE1;A0A1B0GTW1;A0A2R8YDH4;Q9UDY2;A0A3B3IS03;A0A3B3IRV6;A0A3B3ISF1;B7Z2R3;A0A024R225;A0A3B3IU51;A0A3B3IT83;U3KQJ2;A0A3B3IU26;B1AN86	A0A3B3ISZ5;B7Z954;A0A3B3IRI3;A0A024R233;A0A3B3ITE1;A0A1B0GTW1;A0A2R8YDH4;Q9UDY2;A0A3B3IS03;A0A3B3IRV6;A0A3B3ISF1;B7Z2R3;A0A024R225;A0A3B3IU51;A0A3B3IT83	Tight junction protein ZO-2	TJP2			6.3	123.58	0.0649375	0.975409	0.0195141	0.186516	0.152443	0.909954	-0.0409705	-0.408286	24.2075	24.4763	24.3254	24.4129	24.2167	24.438	24.2971	24.4475	24.2002
A0A024R240;P50148;G9FP35;B1AM21;G3V1P7;B7Z581;K7EL62;O95837	A0A024R240;P50148;G9FP35	Guanine nucleotide-binding protein G(q) subunit alpha	GNAQ			36.5	42.142	1.13333	0.526655	0.352292	2.40987	1.02788	0.54387	0.32657	2.18915	24.8685	24.706	24.9191	24.9828	25.4305	25.1372	25.6214	25.3786	25.5302
A0A024R254;Q9Y5V3;Q8TEN0	A0A024R254;Q9Y5V3;Q8TEN0	Melanoma-associated antigen D1	MAGED1;FLJ00163			8.9	86.178	0.241214	0.905182	0.184575	0.611636	0.928386	0.577323	-0.493925	-1.98646	22.3754	23.1473	23.2828	23.2843	23.1528	22.9221	22.8462	22.8554	22.1759
A0A087WXM6;J3QQT2;J3KRX5;A0A024R261;A0A0A6YYL6;P18621;J3QLC8;J3KRB3;A0A087WWH0;J3QS96;A0A0A0MRF8;A0A087WY81;J3KSJ0;A4D1R6;A4D1R5	A0A087WXM6;J3QQT2;J3KRX5;A0A024R261;A0A0A6YYL6;P18621;J3QLC8;J3KRB3;A0A087WWH0;J3QS96;A0A0A0MRF8;A0A087WY81	60S ribosomal protein L17	RPL17;hCG_24487;RPL17-C18orf32			56.8	19.586	0.822343	0.637928	-0.17092	-1.7751	0.535167	0.705625	0.252668	1.21368	30.23	29.9527	29.9863	29.9127	29.9378	29.8057	29.7408	30.2547	30.4187
K7EIU8;A0A024R274;Q13485;Q9BYG6;A0A0S2Z4B2;K7EL18;K7EIJ2;K7ENG8;B4DZP1;K7ES96;K7ELK2;K7EL15;A0A087WUF3	K7EIU8;A0A024R274;Q13485;Q9BYG6;A0A0S2Z4B2	Mothers against decapentaplegic homolog;Mothers against decapentaplegic homolog 4	SMAD4			12.1	50.052	0.0983549	0.963566	-0.091692	-0.274432	0.273444	0.842219	0.175739	0.681814	24.7331	25.4232	24.758	25.362	24.5536	24.7236	25.0922	25.1661	24.9082
A0A024R277;O15269;Q6NUL7;Q59EQ4;A0A2R8Y4S0;A0A2R8Y6A2;B4DR90	A0A024R277;O15269;Q6NUL7;Q59EQ4	Serine palmitoyltransferase 1	SPTLC1			14.8	52.743	0.0764821	0.972947	0.0504042	0.21741	0.141695	0.921169	-0.319302	-0.3824	25.5922	25.3786	25.2669	25.4376	25.841	25.1104	23.5284	25.9194	25.9832
B2R774;A0A024R2A7;P49257;Q53FS4;A0PJ85;B4DVV0	B2R774;A0A024R2A7;P49257;Q53FS4	Protein ERGIC-53	LMAN1			34.3	57.518	0.649849	0.705944	-0.117452	-1.43749	0.331254	0.815194	-0.187433	-0.804144	28.9884	29.1861	29.1837	28.9756	28.9336	29.0966	28.3588	29.0342	29.0505
H3BPJ7;B3KVA4;A0A024R2C0;P15884;A0A1B0GVB8;H3BTP3;E9PH57;A0A1B0GVR6;A0A1B0GW91;A0A1B0GWD5;Q59ES0;A0A0D9SEZ3;K7ESI6;A0A0D9SFU5;A0A0D9SEK1;H3BT24;A0A0D9SGH7;A0A1B0GTP2;H3BMC8;G0LNT4;H3BUQ3;A0A0D9SG55;H3BTC3;H3BP59;A0A0D9SEX8;A0A0D9SG61;A0A075B723;A0A0D9SGE5;H3BTZ0;Q9NQY2;G0LNT6;A0A494C1R3;A0A0D9SF97;H3BPG3;H3BNZ2;K7EPS2;H3BT95;K7EKB9;H3BRF7;K7ERZ7;A0A0D9SFX5;Q6PJU3;P15923	H3BPJ7;B3KVA4;A0A024R2C0;P15884;A0A1B0GVB8;H3BTP3;E9PH57;A0A1B0GVR6;A0A1B0GW91;A0A1B0GWD5;Q59ES0	Transcription factor 4	TCF4			37.9	68.482	0.857854	0.627494	0.121431	1.84543	2.16661	0.373905	-0.807571	-5.13522	26.7659	26.9413	26.8509	26.8924	27.0316	26.9984	26.263	26.3672	25.8695
A8K5D8;A8K4G7;A0A024R2C5;O75351;B3KNH6;Q6PIW4	A8K5D8;A8K4G7;A0A024R2C5;O75351	Vacuolar protein sorting-associated protein 4B	VPS4B			16.4	49.23	1.50557	0.466659	0.10888	3.25527	0.271935	0.843344	-0.0815074	-0.678563	24.8159	24.811	24.8403	24.8669	24.9642	24.9628	24.7821	25.0753	24.6919
A0A024R2F4;Q9BV44;H7C3J3;C9JP31;C9J9V2;H7C0R6	A0A024R2F4;Q9BV44	THUMP domain-containing protein 3	THUMPD3			14	57.002	0.301558	0.881062	0.109957	0.741815	0.388903	0.794985	0.238167	0.922639	24.9907	24.5646	24.6478	24.8225	24.9758	24.7345	24.8511	24.8175	25.5787
A0A024R2F9;Q9BTV4;A0A0S2Z5N2;Q8TEP9	A0A024R2F9;Q9BTV4;A0A0S2Z5N2;Q8TEP9	Transmembrane protein 43	TMEM43;FLJ00144			40.2	44.875	1.13231	0.527163	0.100854	2.4077	0.81866	0.594604	-0.143197	-1.76783	26.278	26.3487	26.3104	26.3638	26.3912	26.4847	26.3269	26.3566	26.1265
A0A024R2G2;Q9BXW9;H7BZJ7	A0A024R2G2;Q9BXW9	Fanconi anemia group D2 protein	FANCD2			4.7	164.13	0.118566	0.951522	-0.051953	-0.325544	0.720349	0.622999	-0.272137	-1.57493	23.9997	23.95	23.9962	24.0208	23.6211	24.1482	23.58	23.5999	23.7937
D3YTB1;A0A024R2G7;F8W727;P62910;D3YTI8;A0A090N8E7	D3YTB1;A0A024R2G7;F8W727;P62910	60S ribosomal protein L32	RPL32			53.4	15.616	0.655263	0.709091	-0.346704	-1.44804	0.312498	0.819482	0.29467	0.764894	28.9397	29.6539	29.4166	29.2061	28.8139	28.95	28.5704	29.4906	29.7931
A0A024R2G8;O15084;B4DIW9;B4DS25	A0A024R2G8;O15084;B4DIW9	Serine/threonine-protein phosphatase 6 regulatory ankyrin repeat subunit A	ANKRD28			8.9	112.96	0.254165	0.902372	0.0744069	0.640031	0.870493	0.58945	0.17649	1.87056	23.4025	23.6174	23.2153	23.4866	23.4779	23.4939	23.6007	23.5394	23.8478
A0A024R2J9;A0A024R2H0;C9J3F6;C9JDR8	A0A024R2J9;A0A024R2H0;C9J3F6		TBC1D5			31.8	88.989	1.17856	0.530103	-0.10025	-2.50673	0.0385604	0.976329	0.00648053	0.113586	27.0025	27.0223	27.0522	26.9246	26.9904	26.8612	26.9317	27.0068	26.8572
A0A024R2H7;Q96Q11;A0A494C0A0;F8W8C3;A0A494C0Y2;A0A494C181;A0A494C1D4;C9JRS7	A0A024R2H7;Q96Q11;A0A494C0A0;F8W8C3;A0A494C0Y2;A0A494C181;A0A494C1D4	CCA tRNA nucleotidyltransferase 1, mitochondrial	TRNT1			11.8	50.143	0.219071	0.90656	0.0439771	0.562428	1.94854	0.366841	-0.532119	-4.44871	23.2238	23.3433	23.2518	23.4149	23.353	23.1829	22.6323	22.9661	22.7561
A0A024R2L1;Q8TAF3;F8W9K4;F8W7Q3;F8W7Y5;F8W6P2;C9JC24	A0A024R2L1;Q8TAF3	WD repeat-containing protein 48	WDR48			25	76.21	0.0718637	0.97224	0.0252431	0.20512	0.3599	0.806458	-0.101076	-0.863395	25.8463	26.0369	26.0268	26.0914	25.7828	26.1115	25.8033	25.9082	25.971
A0A024R2M7;O95747;C9JIG9;F8WBK9	A0A024R2M7;O95747;C9JIG9	Serine/threonine-protein kinase OSR1	OXSR1			20.1	58.022	0.0283074	0.99498	0.00792503	0.0842595	1.84913	0.382952	-0.148083	-4.15926	26.2878	26.0347	26.314	26.1785	26.2029	26.2788	26.035	26.0965	26.0845
C9J9K3;A0A024R2P0;A0A0C4DG17;P08865;A0A024R7P5;Q96RS2;F8WD59	C9J9K3;A0A024R2P0;A0A0C4DG17;P08865;A0A024R7P5;Q96RS2;F8WD59	40S ribosomal protein SA	RPSA;LOC388524			54.4	29.404	0.34086	0.861062	0.059152	0.824101	0.911482	0.58333	-0.118759	-1.95248	29.028	28.8603	28.8841	28.8854	29.0383	29.0262	28.9355	28.8191	28.839
B2RDZ9;A0A024R2P7;Q15024;B4DIU0	B2RDZ9;A0A024R2P7;Q15024;B4DIU0	Exosome complex component RRP42	EXOSC7			14.4	31.874	0.613661	0.72852	0.30918	1.36701	0.0093203	0.994195	0.00802231	0.0283142	23.9168	23.4321	23.7414	23.729	24.3334	23.9554	24.3923	24.0254	23.6242
A0A2R8YCH5;A0A024R2Q3;A0A2R8Y5A3;P35222;A0A2R8Y543;B4DL06;A0A2R8Y5Z1;B4DGU4;A0A2R8Y7Z0;B5BU28;A0A2R8Y804;B4DSW9;A0A2R8Y750;A0A2R8Y5C3;A0A2R8Y6G0;A0A2R8YG06;E7EMJ5;A0A2R8Y815;G9GAG7;E9PDF9;E7EV28;C9IZ65	A0A2R8YCH5;A0A024R2Q3;A0A2R8Y5A3;P35222;A0A2R8Y543;B4DL06;A0A2R8Y5Z1;B4DGU4;A0A2R8Y7Z0;B5BU28;A0A2R8Y804;B4DSW9;A0A2R8Y750;A0A2R8Y5C3	Catenin beta-1	CTNNB1			53.9	85.267	0.0676784	0.973762	-0.0125459	-0.193904	1.07969	0.530803	-0.135541	-2.29675	29.6003	29.741	29.6775	29.7576	29.5894	29.6341	29.5422	29.5674	29.4649
A0A024R2Q4;P61313;A0A2R8YEM3;E7EQV9;B4DLP4;E7ENU7;E7EX53;A0A2R8Y738;B4DEN1;E7ERA2;A4D1Q5;Q76N55;Q96S84	A0A024R2Q4;P61313;A0A2R8YEM3;E7EQV9;B4DLP4;E7ENU7;E7EX53;A0A2R8Y738	Ribosomal protein L15;60S ribosomal protein L15	RPL15			52.5	24.146	0.954393	0.585129	-0.522772	-2.03898	0.106288	0.93593	0.153357	0.294665	30.402	31.0858	31.0366	30.491	30.0609	30.4043	29.4833	30.8002	31.1327
H7BXY3;A0A024R2T6;Q7L2E3;Q6W6M7	H7BXY3;A0A024R2T6;Q7L2E3	Putative ATP-dependent RNA helicase DHX30	DHX30			30.3	130.55	0.649912	0.707542	-0.182733	-1.43762	0.545936	0.70577	-0.167825	-1.23478	28.765	29.0568	28.8734	28.8881	28.5631	28.6958	28.3576	28.6034	28.6826
A0A024R2U9;C9JIF9;P13798;H7C393;H7C1U0;C9JLK2;F8WEH5;H0YFE5	A0A024R2U9;C9JIF9;P13798;H7C393;H7C1U0	Acylamino-acid-releasing enzyme	APEH			32.9	81.224	1.18132	0.533608	0.119426	2.51269	0.143075	0.920446	0.0169799	0.385742	28.3879	28.3558	28.3012	28.3873	28.5095	28.5063	28.519	28.4763	28.4588
A0A0S2Z472;A8KAH7;A0A024R2W3;P13861;H7C330;H7C1L0;H7C4A9;C9J830;A0A0K0K1I3	A0A0S2Z472;A8KAH7;A0A024R2W3;P13861	cAMP-dependent protein kinase type II-alpha regulatory subunit	PRKAR2A			32.5	43.066	0.0801776	0.971087	-0.0587171	-0.227178	0.0162387	0.989156	0.0091629	0.0489585	25.2853	25.2261	25.8174	25.1221	25.3084	25.7222	25.4777	25.2778	25.4247
A0A024R2X1;A0A024R329;Q9Y5P6	A0A024R2X1;A0A024R329;Q9Y5P6	Mannose-1-phosphate guanyltransferase beta	GMPPB			28.1	39.834	1.32964	0.51445	0.238246	2.84117	0.50804	0.724213	0.0962391	1.16039	26.0702	26.2158	26.1819	26.2517	26.4728	26.4582	26.5607	26.4148	26.4958
A0A024R2Z6;Q9BVP2;C9JZT7;B4DMU5;C9JYH9	A0A024R2Z6;Q9BVP2	Guanine nucleotide-binding protein-like 3	GNL3			33.7	60.572	1.015	0.556908	-0.111363	-2.16263	0.307609	0.823643	-0.119475	-0.754598	27.0809	26.944	27.022	26.9522	26.8413	26.9193	26.9784	26.8975	26.4786
A0A024R324;P61586;B4DKN9;C9JNR4;C9JX21;Q5JR08;A0A024R0I3;P08134;A0A0B6XK12;Q5JR07;E9PQH6;Q5JR05;C9JRM1;Q5JR06;Q9BVT0;E9PN11;U3KQA9;U3KQV3;E9PLA2;P62745	A0A024R324;P61586;B4DKN9;C9JNR4;C9JX21;Q5JR08;A0A024R0I3;P08134;A0A0B6XK12;Q5JR07;E9PQH6;Q5JR05	Transforming protein RhoA;Rho-related GTP-binding protein RhoC	RHOA;RHOC;hCG_2043376			52.3	21.768	1.47501	0.472419	0.631741	3.18123	0.546016	0.706098	0.215205	1.23494	25.8552	25.7926	25.4817	26.2779	26.6477	26.099	26.4752	26.6859	26.5092
E9PDQ8;A0A024R325;Q96I99;Q3ZCW5;B7Z2D5;H0Y852;Q9Y436	E9PDQ8;A0A024R325;Q96I99;Q3ZCW5;B7Z2D5	Succinyl-CoA ligase subunit beta;Succinyl-CoA ligase [GDP-forming] subunit beta, mitochondrial	SUCLG2			12.1	41.438	0.23757	0.901626	-0.124224	-0.603598	1.14504	0.520669	-0.221982	-2.43481	23.7227	23.1555	23.0811	23.1783	23.265	23.1433	23.1243	22.961	22.8353
A0A024R326;Q6IPI1;A0A3B3ITT5;P47914;F8WF43;C9IYI4	A0A024R326;Q6IPI1;A0A3B3ITT5;P47914	60S ribosomal protein L29	RPL29			21.7	17.553	0.221106	0.907155	-0.173332	-0.566987	0.073225	0.956118	-0.0708739	-0.208752	28.988	28.9711	28.625	29.1725	28.6956	28.1961	28.2486	28.7269	28.876
A0A024R333;Q6UXN9;C9JBU3	A0A024R333;Q6UXN9	WD repeat-containing protein 82	TMEM113;WDR82			35.1	35.079	0.450688	0.804281	-0.0591939	-1.04686	0.132646	0.921294	-0.0473569	-0.36035	25.6587	25.6929	25.7167	25.569	25.5838	25.7379	25.3435	25.7123	25.6928
U3KQU4;A0A024R342;O14569	U3KQU4;A0A024R342;O14569	Cytochrome b561 domain-containing protein 2	CYB561D2			24	5.212	0.519533	0.776652	-1.06588	-1.18299	0.380881	0.799808	-1.30542	-0.906321	25.1586	25.2727	25.2568	25.0692	22.3629	25.0584	22.5008	21.1141	24.9593
A0A024R355;Q8IV48;E5RIV7;B4DWF4	A0A024R355;Q8IV48	3-5 exoribonuclease 1	THEX1;ERI1			10.6	40.063	0.333253	0.863875	-0.0862726	-0.808304	0.0897145	0.9467	0.0728582	0.252131	23.5739	23.5098	23.4736	23.2289	23.5548	23.5147	23.195	23.2782	24.0438
B4DZZ0;B3KQB4;A0A024R371;O75915;F8WF90;C9JQU6;F8WF33;B4DWQ6	B4DZZ0;B3KQB4;A0A024R371;O75915;F8WF90;C9JQU6;F8WF33;B4DWQ6	PRA1 family protein 3	ARL6IP5			18.2	19.206	0.353929	0.855558	-0.921947	-0.851109	0.128321	0.921146	-0.386949	-0.349726	24.332	25.283	24.2523	24.843	24.6166	21.6419	23.3297	22.6119	23.9991
B4DL49;A8K2H4;A0A024R374;P07858;B4DMY4;B3KUJ8;E9PR54;E9PJ67;Q5HYG5;E9PCB3;E9PKQ7;E9PNL5;E9PHZ5;E9PLY3;E9PSG5;E9PQM1;Q6LAF9;E9PS78;R4GMQ5	B4DL49;A8K2H4;A0A024R374;P07858;B4DMY4;B3KUJ8	Cathepsin B;Cathepsin B light chain;Cathepsin B heavy chain	CTSB			29.3	30.767	2.26808	0.329023	0.735122	5.48128	0.0525388	0.967445	0.0272179	0.152662	27.772	27.9039	27.7479	28.3548	28.7798	28.4946	28.4527	28.434	28.8242
A0A024R388;Q9NXG2;O60362;Q6MZT3;B4DFY9;H3BNW0	A0A024R388;Q9NXG2;O60362;Q6MZT3;B4DFY9	THUMP domain-containing protein 1	THUMPD1;44M2.1;DKFZp686C1054			32	39.315	0.252131	0.902328	0.107035	0.635589	0.86714	0.589905	0.166344	1.86389	24.7695	24.2577	24.3182	24.6262	24.5761	24.4642	24.7278	24.5885	24.8492
A0A024R394;Q9UHD1;A0A024R3C3;E9PPQ5;E9PIZ4;E9PSD5;E9PHZ2;Q9NZ93;E9PL00;E9PIF7	A0A024R394;Q9UHD1;A0A024R3C3;E9PPQ5	Cysteine and histidine-rich domain-containing protein 1	CHORDC1			35.5	37.533	0.267396	0.898548	0.0509065	0.668765	0.166085	0.901364	-0.0463492	-0.440692	26.7863	26.6324	26.7537	26.6905	26.8911	26.7436	26.6102	26.6791	26.8968
A0A024R395;P49959;F8W7U8;Q05D78;F5GXT0;Q9BS79;F5H742;A0A0S2Z438;F5H256	A0A024R395;P49959;F8W7U8;Q05D78	Double-strand break repair protein MRE11A	MRE11A			34.9	80.592	0.474809	0.793072	0.0796979	1.09478	0.0507329	0.967166	-0.0105813	-0.147669	27.9167	27.7186	27.7077	27.8234	27.8476	27.9111	27.7693	27.7987	27.9825
Q68DE6;A0A024R3C7;Q13315;B4DSP3	Q68DE6;A0A024R3C7;Q13315;B4DSP3	Serine-protein kinase ATM	DKFZp781A0353;ATM			3.9	116.79	0.494768	0.782896	0.255099	1.13424	0.668164	0.652927	-0.338973	-1.47317	22.9927	22.8393	22.4542	22.8472	22.8716	23.3326	22.9739	22.6661	22.3945
A0A024R3D4;Q8ND24;E9PN76;E9PRE9	A0A024R3D4;Q8ND24;E9PN76	RING finger protein 214	DKFZp547C195;RNF214			15.5	77.667	0.0908978	0.970047	0.0779139	0.255202	0.446804	0.764802	0.269378	1.03912	25.5355	24.9188	25.0623	24.7811	25.3821	25.5871	25.3878	25.4707	25.6999
H0YDD4;B4DJX1;Q86YI5;A0A024R3D8;P10515;B4DS43;E9PEJ4;B4DLQ2;Q01991;Q16791;B4E1P6	H0YDD4;B4DJX1;Q86YI5;A0A024R3D8;P10515;B4DS43;E9PEJ4;B4DLQ2	Acetyltransferase component of pyruvate dehydrogenase complex;Dihydrolipoyllysine-residue acetyltransferase component of pyruvate dehydrogenase complex, mitochondrial	DLAT			29.4	51.201	0.023821	0.996631	-0.00764275	-0.071239	0.930579	0.577163	-0.277475	-1.99087	26.1167	26.3607	26.2852	26.3637	26.0951	26.281	26.1957	25.8845	25.827
A0A1W2PPC6;B2R6Z9;B3KY32;A0A024R3H8;Q9H3H5;B4DXH3;A0A1W2PQH0;F8W681;A0A1W2PQD1;F8WE55;A0A1W2PRR6	A0A1W2PPC6;B2R6Z9;B3KY32;A0A024R3H8;Q9H3H5;B4DXH3;A0A1W2PQH0	UDP-N-acetylglucosamine--dolichyl-phosphate N-acetylglucosaminephosphotransferase	DPAGT1			6.9	42.587	0.420761	0.811796	-0.292006	-0.986989	0.515862	0.720658	-0.377612	-1.17578	26.429	27.0739	26.9412	26.9506	26.2123	26.4053	25.7155	26.2038	26.516
A0A024R3J7;P46977;A0A0C4DH80;E9PN73;E9PI32;H0YET6	A0A024R3J7;P46977	Dolichyl-diphosphooligosaccharide--protein glycosyltransferase subunit STT3A	hCG_2032701;STT3A			17.6	80.428	0.217861	0.907297	-0.157097	-0.559712	0.902934	0.584867	-0.337969	-1.93534	28.5407	29.2092	29.1945	29.1698	28.618	28.6854	28.4985	28.4524	28.5084
A0A024R3L9;Q4G0F5;A0A0D9SFQ6	A0A024R3L9;Q4G0F5;A0A0D9SFQ6	Vacuolar protein sorting-associated protein 26B	VPS26B			8.6	39.154	0.0257344	0.995377	0.0237192	0.0768065	0.040085	0.97613	0.0492287	0.117897	22.7921	23.2362	23.4543	23.2418	22.7439	23.568	23.0284	22.7715	23.9015
A0A024R3M1;Q9P016	A0A024R3M1;Q9P016	Thymocyte nuclear protein 1	THYN1			9.3	25.697	1.0876	0.529813	-0.670432	-2.31333	1.64686	0.435837	0.746248	3.61035	23.8951	23.1833	23.5772	23.2462	22.5409	22.8572	23.6633	23.5609	23.6588
A0A024R3P1;O15121;E7EMA0	A0A024R3P1;O15121	Sphingolipid delta(4)-desaturase DES1	DEGS1			18	37.866	0.0453806	0.987227	0.0313918	0.132777	0.888377	0.583896	0.730811	1.90623	23.9211	24.0719	23.7707	23.567	23.9624	24.3284	24.0606	24.9241	25.0655
Q6P2S0;Q659G3;E9PE20;A0A024R3P3;P49458	Q6P2S0;Q659G3;E9PE20;A0A024R3P3;P49458	Signal recognition particle 9 kDa protein	SRP9;DKFZp564M2223			38.8	5.7685	0.900401	0.613422	-0.128648	-1.93027	0.211784	0.872117	0.0544993	0.546035	25.7662	25.5457	25.6127	25.5173	25.4877	25.5337	25.7546	25.4184	25.5292
A0A024R3P9;Q9H3P7	A0A024R3P9;Q9H3P7	Golgi resident protein GCP60	ACBD3			19.7	60.593	0.116471	0.952526	0.0433998	0.320311	0.219502	0.866338	0.0938848	0.563393	24.8825	24.5183	24.7385	24.7423	24.9094	24.6177	24.5638	24.977	25.0103
A0A024R3R5;A0A494C1L1;Q14739;C9JXK0;B4E0Z3;C9JES9	A0A024R3R5;A0A494C1L1;Q14739;C9JXK0	Lamin-B receptor	LBR			14.8	70.729	0.0481011	0.985646	-0.0360196	-0.140365	1.11708	0.527591	-0.349653	-2.37542	27.6106	28.1507	28.3053	28.2384	27.7305	27.9897	27.6462	27.6524	27.6109
A0A024R3T8;P09874;B4E0E1;B2R5W3;Q05D33;Q6PJL0;Q96P95;Q5VX84;Q5VX85	A0A024R3T8;P09874;B4E0E1;B2R5W3	Poly [ADP-ribose] polymerase 1	PARP1			55.3	113.08	0.856962	0.627052	-0.123919	-1.84366	1.28933	0.494683	-0.184419	-2.75018	32.1076	32.1161	32.1933	32.0698	31.8924	32.0829	31.7826	31.8338	31.8756
Q658J0;A0A024R3V5;A0A024R3V7;Q9GZT8;E7EXA3;Q6X734;C9JN42;B8ZZI0	Q658J0;A0A024R3V5;A0A024R3V7;Q9GZT8;E7EXA3;Q6X734	NIF3-like protein 1	DKFZp762L015;NIF3L1			19	37.029	0.559823	0.750618	-0.141384	-1.26195	0.486716	0.742357	0.173199	1.11834	24.1011	24.192	24.3958	24.2278	24.002	24.0351	23.9856	24.4033	24.3955
A0A024R3V8;Q99598;C4P0D6;C4P0D8;C4P0D4;Q5VVQ1;Q9NRI2;Q7Z3N9	A0A024R3V8;Q99598;C4P0D6;C4P0D8;C4P0D4;Q5VVQ1	Translin-associated protein X	TSNAX;DISC1			23.4	33.112	0.569155	0.753511	0.180001	1.28019	0.220812	0.866113	-0.0764573	-0.566328	24.2029	24.315	24.4209	24.4852	24.2792	24.7145	24.4916	24.324	24.4339
A0A024R3W2;Q15388	A0A024R3W2;Q15388	Mitochondrial import receptor subunit TOM20 homolog	TOMM20			27.6	16.298	0.302529	0.881217	-0.722172	-0.743868	0.536786	0.706621	1.18116	1.21685	24.7492	24.8041	24.7086	24.8751	25.1241	22.0963	25.2534	25.1831	25.2024
A0A024R3W5;Q9ULF5;E7ENT5;E7EV45	A0A024R3W5;Q9ULF5	Zinc transporter ZIP10	SLC39A10			8.7	94.131	0.230722	0.906928	-0.0856063	-0.588428	0.327564	0.816675	0.0635573	0.796452	24.6816	25.0111	25.1178	24.8	24.7778	24.976	24.8343	24.9056	25.0045
A0A024R3W7;P24534;C9JZW3;F2Z2G2;F8WF65	A0A024R3W7;P24534	Elongation factor 1-beta	EEF1B2			47.6	24.763	0.669945	0.696174	0.16238	1.47663	2.1052	0.367333	0.339357	4.93428	28.5289	28.215	28.4204	28.4706	28.6684	28.5124	28.9077	28.8254	28.9364
A0A024R3X4;P10809;B3GQS7;B7Z597;B7Z4F6;B7Z5E7;B7Z532;Q53SE2;E7ESH4;E7EXB4;B9VPB4;B9VP19;A0A0S2Z415;Q53QD5;C9JL25;C9JL19;C9JCQ4;B9VP24;C9J0S9	A0A024R3X4;P10809;B3GQS7;B7Z597;B7Z4F6;B7Z5E7	60 kDa heat shock protein, mitochondrial	HSPD1			79.1	61.054	0.938058	0.593522	0.255862	2.00595	0.636257	0.669955	0.0759036	1.41102	31.8243	31.4133	31.63	31.8395	31.9712	31.8245	31.9985	31.9058	31.9586
A0A024R3Z2;B8ZZN6;P63165;B8ZZJ0;B8ZZ67;B9A032;G2XKQ0	A0A024R3Z2;B8ZZN6;P63165;B8ZZJ0;B8ZZ67;B9A032;G2XKQ0	Small ubiquitin-related modifier 1;Small ubiquitin-related modifier	SUMO1			43.6	11.557	0.902347	0.611688	-0.249805	-1.93417	0.17836	0.893593	0.111821	0.469452	26.4149	26.116	26.1203	25.8177	25.9795	26.1046	25.6342	26.2684	26.3346
Q6FHH6;Q53TN2;A0A024R3Z5;O43813;B2R602;E9PHS0;B4DGM7;F8WDS9;H7C2E3	Q6FHH6;Q53TN2;A0A024R3Z5;O43813;B2R602;E9PHS0	LanC-like protein 1	LANCL1			38.6	45.267	0.436566	0.807233	0.0514113	1.01867	0.0459096	0.971692	-0.019268	-0.134255	29.0442	29.038	28.9	29.0817	29.0315	29.0233	28.7427	29.1459	29.1901
A0A024R3Z6;Q53FN7;Q7L1Q6;D3DN77;B3KU41;C9IZ80;H0Y503;C9JFN4;Q3LIC9;C9J188;C9JWF5	A0A024R3Z6;Q53FN7;Q7L1Q6;D3DN77;B3KU41;C9IZ80	Basic leucine zipper and W2 domain-containing protein 1	BZW1;hCG_2022736			19.3	48.043	0.0391742	0.989877	-0.0160599	-0.115323	1.59807	0.46403	0.343566	3.48527	27.2116	26.7455	27.0573	26.9593	27.0373	26.9697	27.3679	27.152	27.477
A0A024R407;P11137;A0A024R3Z1;A8K5Y1;A0A024R409;Q59FX9;A0A024R3Y8;Q6NYC5;E7EV03;A8MZ31;H7BZB9	A0A024R407;P11137;A0A024R3Z1;A8K5Y1;A0A024R409;Q59FX9;A0A024R3Y8;Q6NYC5	Microtubule-associated protein;Microtubule-associated protein 2	MAP2			4.3	199.52	0.406596	0.82162	0.104777	0.958462	0.073502	0.956541	0.0217851	0.20949	25.0064	24.8517	24.8984	24.8678	25.2081	24.995	25.0832	24.9839	25.0692
A0A024R413;O43676;C9JKQ2	A0A024R413;O43676;C9JKQ2	NADH dehydrogenase [ubiquinone] 1 beta subcomplex subunit 3	NDUFB3			21.4	11.402	0.351365	0.859189	-0.390162	-0.845823	0.536209	0.705328	0.541141	1.21572	23.0096	23.399	23.0386	21.8723	23.161	23.2434	23.3499	23.2399	23.3104
B3KMB8;A0A024R419;Q9NYY8	B3KMB8;A0A024R419;Q9NYY8	FAST kinase domain-containing protein 2	KIAA0971;FASTKD2			16.6	81.434	0.201908	0.913317	-0.0737699	-0.523653	0.410918	0.783822	0.159793	0.967179	24.2539	24.4334	24.7056	24.4057	24.4702	24.2956	24.8485	24.4873	24.3151
A0A024R436;H7BXK9;Q9NP58	A0A024R436;H7BXK9;Q9NP58	ATP-binding cassette sub-family B member 6, mitochondrial	ABCB6			18.8	48.833	0.118938	0.951154	0.0892499	0.326472	0.61417	0.682987	-0.271274	-1.368	23.2511	24.0749	23.8977	24.0133	23.6336	23.8446	23.8345	23.5795	23.2637
A0A024R442;Q53SB6;E7ETB3;B7Z7F0;Q9ULA0;A0A024R443;Q9BSS9;E7EMB6;C9JBE1;Q9HAC6;F8WAN0;B7Z822;B9ZVU2;E5RJ35;E7EPX3;C9J1E2	A0A024R442;Q53SB6;E7ETB3;B7Z7F0;Q9ULA0;A0A024R443;Q9BSS9;E7EMB6;C9JBE1;Q9HAC6;F8WAN0;B7Z822	Aspartyl aminopeptidase	DNPEP			33.3	51.998	0.24684	0.9066	-0.103369	-0.624005	0.891695	0.586158	0.196451	1.91285	25.683	25.9501	26.1585	25.7725	26.007	25.702	26.102	26.0235	25.9452
B4DMR3;A0A024R498;A0A024R451;P07093;C9JN98	B4DMR3;A0A024R498;A0A024R451;P07093	Glia-derived nexin	SERPINE2			9	37.157	0.757915	0.656993	-0.317118	-1.6484	0.147929	0.9149	-0.0915979	-0.397454	26.5816	26.0868	26.045	25.9968	25.75	26.0153	25.4197	25.9255	26.142
B4DHC5;A0A024R458;A0A0S2Z444;A0A0S2Z3Y3;A0A0S2Z3Z1;A0A0S2Z462;P52594;C9J2I0;B8ZZY2	B4DHC5;A0A024R458;A0A0S2Z444;A0A0S2Z3Y3;A0A0S2Z3Z1;A0A0S2Z462;P52594;C9J2I0;B8ZZY2	Arf-GAP domain and FG repeat-containing protein 1	HRB;AGFG1			18.5	46.506	1.0371	0.549626	0.187113	2.20819	0.783932	0.603309	0.128524	1.69944	25.0225	25.1401	25.2031	25.177	25.3666	25.3833	25.4865	25.3659	25.4601
A0A384MR03;B7ZLE5;A0A024R462;P02751;Q5CZ99;Q59G22;Q6N084;A6YID4;A6YID5;A6YID3;A6YID2;A6YID6;B4DU16;B4DTK1;H0Y7Z1;Q68CX6;Q6MZM7;Q9UQS6;O95617;H0Y4K8;A6YID7;O95608;Q6MZF4	A0A384MR03;B7ZLE5;A0A024R462;P02751;Q5CZ99;Q59G22;Q6N084;A6YID4;A6YID5;A6YID3;A6YID2;A6YID6;B4DU16;B4DTK1;H0Y7Z1;Q68CX6;Q6MZM7;Q9UQS6;O95617	Fibronectin;Anastellin;Ugl-Y1;Ugl-Y2;Ugl-Y3	FN1;DKFZp686I1370;DKFZp686L11144;DKFZp686O13149;DKFZp686O12165			4.7	239.62	0.124241	0.946487	-0.339338	-0.339648	0.079609	0.953124	-0.258674	-0.225679	23.2283	25.3832	24.209	23.9062	22.5954	25.3009	25.3516	22.7771	22.8977
Q53EX1;A8JZZ8;A0A024R467;Q9Y276;C9J8G3;Q53RT4;C9J1S9;H7C492;A8BSR7;C9J4Q9;C9JAS4;H7BZF6;A0A0S2Z3G6;A0A2R8Y7T3	Q53EX1;A8JZZ8;A0A024R467;Q9Y276;C9J8G3;Q53RT4	Mitochondrial chaperone BCS1	BCS1L			16	47.535	0.0821014	0.970718	-0.08041	-0.232241	0.696679	0.642978	-0.317333	-1.52874	22.8611	23.4961	23.855	23.5724	22.9545	23.444	22.8885	23.1771	22.9534
A0A024R473;Q9H9J2	A0A024R473;Q9H9J2	39S ribosomal protein L44, mitochondrial	MRPL44			23.2	37.535	0.0832773	0.971137	0.0290864	0.235329	0.36604	0.807474	0.111773	0.875996	25.0849	25.1044	24.7788	25.041	25.1172	24.8972	25.2702	25.2075	24.9131
Q53S54;A0A024R475;Q13618;B7Z600;A0A087WTG3;H7C1L6;A0A087X1R9;H7C399	Q53S54;A0A024R475;Q13618;B7Z600	Cullin-3	CUL3			33.8	86.465	0.0743549	0.974294	0.0149186	0.211761	0.417613	0.782093	0.0767447	0.98066	27.1454	27.2874	27.2406	27.1374	27.3334	27.2474	27.2091	27.3585	27.3809
A0A087WUI8;A0A024R482;Q96IJ6;F8WD54;A0A0U1RRC2;B4DJR0;C9J255;C9JAH0	A0A087WUI8;A0A024R482;Q96IJ6;F8WD54	Mannose-1-phosphate guanyltransferase alpha	GMPPA			18.8	43.668	1.03828	0.54946	0.212109	2.21062	0.133914	0.921974	0.0569496	0.363456	25.1408	25.2612	25.1067	25.2682	25.5451	25.3318	25.2957	25.317	25.7032
A0A2Q3DP09;A0A024R486;Q7Z3E5;C9JW07	A0A2Q3DP09;A0A024R486;Q7Z3E5	LisH domain-containing protein ARMC9	ARMC9			5.1	75.578	0.724976	0.669712	0.578568	1.58396	0.358056	0.80608	0.373079	0.859604	23.4394	22.7383	22.8349	23.0514	24.0585	23.6383	24.5979	23.6279	23.6417
A0A024R488;Q8IWB7;Q9H8N9;C9JJ54;A0A494C0A6	A0A024R488;Q8IWB7;Q9H8N9;C9JJ54;A0A494C0A6	WD repeat and FYVE domain-containing protein 1	WDFY1			21.2	46.323	1.00894	0.556779	0.267534	2.15016	0.763018	0.604669	-0.288974	-1.6584	24.8327	25.2479	25.1031	25.3595	25.277	25.3498	25.2065	25.2176	24.6952
B2RBE0;A0A024R497;O95573;B3KN05;B3KMA6;Q6PIM8;F5H062;C9JC11;F5GWH2	B2RBE0;A0A024R497;O95573;B3KN05;B3KMA6	Long-chain-fatty-acid--CoA ligase 3	ACSL3			33.2	80.347	0.0224576	0.99579	-0.00948779	-0.0672584	0.460521	0.756257	-0.119699	-1.06642	27.2498	27.5831	27.5992	27.5972	27.3123	27.494	27.267	27.4985	27.2789
A0A024R4A0;P19338;B3KTP9;B3KM80;Q6ZS99;Q9BQ02;H7BY16;C9JYW2;C9JLB1;C9J1H7;C9JWL1	A0A024R4A0;P19338;B3KTP9;B3KM80;Q6ZS99;Q9BQ02;H7BY16	Nucleolin	NCL			32.1	76.613	0.933625	0.593829	0.218719	1.99701	1.25928	0.502529	0.203133	2.6832	30.7131	30.3704	30.5394	30.6776	30.8403	30.7611	31.0814	30.8993	30.9076
A0A024R4A5;Q6Y7W6;I1E4Y6;B4DRT8;E7ESB6;C9JHW1;B4DZM1;C9JW88;F8WCD5;C9JPV7;C9JXQ0;C9J0V6;C9JHT0;C9JRZ2;B4DLU7;C9JH18	A0A024R4A5;Q6Y7W6;I1E4Y6;B4DRT8;E7ESB6;C9JHW1;B4DZM1	PERQ amino acid-rich with GYF domain-containing protein 2	TNRC15;GIGYF2			12.2	149.94	1.28069	0.510924	0.209241	2.73083	0.288003	0.839149	0.110896	0.713016	26.0261	25.9871	25.9886	26.0696	26.2313	26.3286	26.5832	26.128	26.2511
Q7Z518;A8K413;A0A087WXC5;A0A024R4B3;E7ESZ7;O95299;Q53SW4;Q59FM0;H7C2W5;H7C1Y7;H7C2X4;Q8N1B9;C9J6X0;Q53QE8	Q7Z518;A8K413;A0A087WXC5;A0A024R4B3;E7ESZ7;O95299;Q53SW4	NADH dehydrogenase [ubiquinone] 1 alpha subcomplex subunit 10, mitochondrial	NDUFA10			31.9	40.676	1.39333	0.4984	-0.20046	-2.98778	0.136881	0.923446	0.0202325	0.370701	26.7498	26.5892	26.7544	26.5629	26.4268	26.5024	26.5895	26.4615	26.5018
Q53F76;A0A024R4C1;Q9BUI4;E9PHH9;Q9BT08	Q53F76;A0A024R4C1;Q9BUI4;E9PHH9;Q9BT08	DNA-directed RNA polymerase III subunit RPC3	POLR3C			12.5	60.603	1.89851	0.399654	-0.251432	-4.30132	0.216866	0.868637	-0.291342	-0.557479	23.3015	23.4007	23.2001	23.0648	23.0453	23.0378	21.7483	23.0292	23.4964
A0A0A0N0L3;A0A024R4E2;Q13148;A0A087WX29;B1AKP7;G3V162;A0A087X260;A0A087WYY0;A0A0A0N0M3;K7EJM5;A0A0A0N0N3;K7EN94;B4DRW3;A0A1W2PNU8;A0A087WXQ5;A0A087WV68;K7EJ99;A0A0A0MSV7;A0A087WW61;A0A087WX67;A0A087WXV3;A0A087WYE7;A0A087WZC9;A0A087WTZ4;K7EL26;A0A087WZM1	A0A0A0N0L3;A0A024R4E2;Q13148;A0A087WX29;B1AKP7;G3V162;A0A087X260;A0A087WYY0;A0A0A0N0M3;K7EJM5;A0A0A0N0N3;K7EN94;B4DRW3;A0A1W2PNU8	TAR DNA-binding protein 43	TDP43;TARDBP			42.5	41.632	0.540436	0.764129	0.0620842	1.22401	0.529377	0.709438	-0.0717843	-1.20232	27.7823	27.8188	27.9316	27.8695	27.8994	27.95	27.7954	27.7652	27.9429
A0A024R4E5;Q00341;B2R5V9;H0Y394;Q6ZS03;B4DKR8;Q96CF6;H7C0A4;Q6ZN49;Q2HJC8;C9J5E5;C9JIZ1;C9JZI8;C9JHZ8;C9JES8;C9JHS7;Q5HYC5;H7BZC3;H7C2D1;C9JT62;C9JK79;C9JBS3;C9JEJ8;C9JHN6;C9JMQ6;C9JQ82;C9JHS9;C9J739;H7C3D0	A0A024R4E5;Q00341;B2R5V9;H0Y394;Q6ZS03;B4DKR8;Q96CF6	Vigilin	HDLBP			39.3	141.44	0.868246	0.625477	-0.0495923	-1.86609	0.0572373	0.965191	0.00765546	0.165577	29.7611	29.8024	29.7835	29.7739	29.6917	29.7327	29.671	29.7418	29.8084
A0A024R4E7;O96011;B3KSS3	A0A024R4E7;O96011;B3KSS3	Peroxisomal membrane protein 11B	PEX11B			9.3	28.431	0.363358	0.857009	-0.198741	-0.870496	1.2469	0.508662	-0.567306	-2.65582	24.7732	24.8822	25.0575	24.8541	24.2859	24.9767	24.1758	24.1149	24.1241
A0A024R4F1;P06733;A0A2R8Y6G6;E2DRY6;K7EM90;A0A2R8YEM5;A0A2R8Y879;A4QMW8;A4UCS8;K7ERS8;A0A2R8Y798;A0A2R8YEG5;A0A2R8Y6I8;L0R849	A0A024R4F1;P06733;A0A2R8Y6G6;E2DRY6	Alpha-enolase;Enolase	ENO1			76.5	47.168	0.502447	0.782402	0.190022	1.14938	1.27469	0.496183	0.253602	2.71746	31.8463	31.3551	31.4848	31.629	31.89	31.7372	32.0644	31.8967	32.0559
A0A024R4F4;M0R2B7;P28340;Q308M6;M0QZR8;Q59FA0;A0A2R8Y705;A0A2R8Y7K6;M0QZB4;M0QXE6;M0QXQ2;M0R3H8	A0A024R4F4;M0R2B7;P28340;Q308M6;M0QZR8;Q59FA0;A0A2R8Y705;A0A2R8Y7K6	DNA polymerase;DNA polymerase delta catalytic subunit	POLD1			21.6	123.63	0.0830209	0.971319	0.0210005	0.234656	1.09213	0.53053	-0.15436	-2.32282	26.6983	26.9114	26.7226	26.8057	26.6929	26.8967	26.6992	26.5932	26.6398
B3KS61;A0A024R4F6;O60725	B3KS61;A0A024R4F6;O60725	Protein-S-isoprenylcysteine O-methyltransferase	ICMT			9.6	21.735	0.479555	0.792714	-0.243925	-1.10417	0.712002	0.629662	-1.35318	-1.55863	24.2218	24.7817	24.934	24.4883	24.3701	24.3473	21.3657	24.2523	23.5281
A0A024R4G1;Q8N1G4	A0A024R4G1;Q8N1G4	Leucine-rich repeat-containing protein 47	LRRC47			45.1	63.472	0.200901	0.913357	-0.020153	-0.521361	0.279263	0.838345	0.056186	0.694319	28.4755	28.493	28.3832	28.3946	28.4549	28.4417	28.3441	28.4995	28.6162
B2R5M9;A0A024R4H0;Q02809;B4DGN8;Q5JXB7;B4DHT1;Q5JXB8	B2R5M9;A0A024R4H0;Q02809;B4DGN8	Procollagen-lysine,2-oxoglutarate 5-dioxygenase 1	PLOD1			36.2	83.503	0.906045	0.611311	-0.104009	-1.94158	0.409859	0.785202	-0.027029	-0.965044	27.7652	27.9129	27.776	27.7055	27.6761	27.7605	27.7108	27.6654	27.6848
Q75MT9;Q6FHZ0;A0A024R4K3;P40926;Q0QF37;G3XAL0;B3KTM1	Q75MT9;Q6FHZ0;A0A024R4K3;P40926;Q0QF37;G3XAL0;B3KTM1	Malate dehydrogenase;Malate dehydrogenase, mitochondrial	MDH2			69.9	33.228	0.587874	0.74958	0.123787	1.31673	0.111206	0.933968	0.0160414	0.307095	30.6831	30.3844	30.531	30.5997	30.7273	30.6429	30.6829	30.6051	30.73
A0A024R4M0;P46781;B5MCT8;C9JM19;B7Z732;A5D904;F2Z3C0;A8MXK4	A0A024R4M0;P46781;B5MCT8;C9JM19;B7Z732;A5D904	40S ribosomal protein S9	RPS9			57.2	22.591	1.45404	0.488091	-0.177836	-3.13097	0.0181109	0.987673	-0.0070521	-0.0544927	32.6942	32.8704	32.7442	32.6355	32.5679	32.5719	32.3315	32.6843	32.7383
A0A024R4M8;Q8NBN7;G8JLA1;B3KVA3;A8K6B4;K7EQB5;K7ERV1;B2RDH1	A0A024R4M8;Q8NBN7;G8JLA1;B3KVA3;A8K6B4	Retinol dehydrogenase 13	RDH13			13.6	35.932	0.0729022	0.973572	0.0279516	0.207892	0.325123	0.819719	0.23011	0.791356	22.7339	22.9998	23.005	22.985	22.7493	23.0884	22.6467	23.5648	23.3015
A0A494C017;C9JJV6;C9JZL8;A0A499FIY8;C9J5M0;C9JC07;B4DG42;A0A024R4N0;Q96S97	A0A494C017;C9JJV6;C9JZL8;A0A499FIY8;C9J5M0;C9JC07;B4DG42;A0A024R4N0;Q96S97	Myeloid-associated differentiation marker	MYADM;hCG_1640809			27	13.153	1.16905	0.528503	0.400711	2.48624	1.21983	0.520509	-0.597469	-2.59635	25.4309	25.2901	25.7228	25.686	26.0003	25.9595	25.4514	25.5308	24.8713
M0R0F0;Q53G25;A0A024R4Q8;P46782;M0R0R2;M0QZN2;Q59EK8	M0R0F0;Q53G25;A0A024R4Q8;P46782;M0R0R2;M0QZN2	40S ribosomal protein S5;40S ribosomal protein S5, N-terminally processed	RPS5			51.5	22.391	0.193767	0.915432	0.0638631	0.505052	1.38271	0.481864	0.312618	2.96308	30.2458	30.5268	30.5901	30.5209	30.6366	30.3968	30.6715	30.9118	30.9089
A0A024R4R3;O75175;B7Z6J7;H7C148;A0A2R8Y7Z8;H7C3F5;A0A2H2FJL5;Q6ZMJ6;H7C5J4;A0A0G2JPP0;A0A0G2JNJ7;A0A2R8Y6N5;A0A2R8Y4W0;H0Y5X7	A0A024R4R3;O75175;B7Z6J7;H7C148	CCR4-NOT transcription complex subunit 3	CNOT3			9.8	81.871	0.122952	0.94811	0.0334237	0.336453	1.24718	0.510152	-0.16309	-2.65643	25.4943	25.22	25.2633	25.3606	25.27	25.4473	25.2249	25.1286	25.2351
A0A024R4T4;P61081;M0QX69;M0QYI6	A0A024R4T4;P61081	NEDD8-conjugating enzyme Ubc12	UBE2M			36.1	20.9	0.299762	0.881549	0.101194	0.738011	0.271974	0.843773	-0.0610669	-0.678646	26.6917	26.2548	26.4003	26.4547	26.6074	26.5882	26.4227	26.4036	26.6409
A0A024R4U3;Q14166;Q9BR23;V9GY16	A0A024R4U3;Q14166	Tubulin--tyrosine ligase-like protein 12	TTLL12			46	74.403	0.440236	0.805605	0.0317103	1.02601	0.811529	0.595636	-0.0842113	-1.75376	28.0695	28.0504	28.1089	28.1175	28.1469	28.0596	27.9439	28.0513	28.0761
Q9Y4Q3;B7Z926;A0A024R4W4;Q86X06;A0A024R4V5;O95696;B4DZC2;Q59G93;J3KQ61;B4DZ41;B4E3L9;Q5CZ83	Q9Y4Q3;B7Z926;A0A024R4W4;Q86X06;A0A024R4V5;O95696;B4DZC2;Q59G93;J3KQ61;B4DZ41;B4E3L9	Bromodomain-containing protein 1	DKFZp434B094;BRD1			8.8	79.702	0.981497	0.568304	-0.303349	-2.09405	0.502282	0.730882	0.140988	1.14905	25.6232	25.1932	25.3377	25.0739	24.9625	25.2077	25.3726	25.0325	25.262
A0A024R4X0;P00387;Q6ZVI6;B1AHF3	A0A024R4X0;P00387;Q6ZVI6;B1AHF3	NADH-cytochrome b5 reductase;NADH-cytochrome b5 reductase 3;NADH-cytochrome b5 reductase 3 membrane-bound form;NADH-cytochrome b5 reductase 3 soluble form	CYB5R3			26.5	33.238	0.0265985	0.995392	0.0137615	0.0793138	1.41539	0.489915	-0.480478	-3.03941	25.4934	25.735	25.6801	25.3433	25.8648	25.7415	25.1624	25.1472	25.1986
A0A024R4X7;Q9UKX7;B4E2D3;B0QY21;X6RKQ2;B1AHA5	A0A024R4X7;Q9UKX7	Nuclear pore complex protein Nup50	hCG_1989366;NUP50			42.5	50.144	0.793955	0.643255	0.165447	1.71915	0.197008	0.883569	0.0570151	0.512475	25.9339	25.8472	25.6607	25.9555	26.08	25.9026	26.2316	25.9225	25.9552
A0A024R4Z6;Q08945;E9PMD4;Q59GH7;A0A0U1RRK2;E9PPZ7	A0A024R4Z6;Q08945	FACT complex subunit SSRP1	SSRP1			41.9	81.074	0.954933	0.58774	-0.124541	-2.04007	1.102	0.531148	-0.0946687	-2.34357	29.8247	29.6919	29.6629	29.6604	29.5385	29.607	29.4737	29.5063	29.5418
Q6NZ44;B3KXC3;A0A024R525;P02794;G3V1D1;G3V192;Q6NS36;E9PPQ4;E9PRK8;E9PKY7;Q8TD27;A9JQE1;E9PQR3;E9PKM5;E9PK45	Q6NZ44;B3KXC3;A0A024R525;P02794;G3V1D1;G3V192;Q6NS36	Ferritin;Ferritin heavy chain;Ferritin heavy chain, N-terminally processed	FTH1			36.1	21.241	0.4164	0.814163	0.0954177	0.978219	0.171314	0.90038	-0.0729135	-0.452988	26.3933	26.4149	26.2355	26.2872	26.4958	26.547	26.1036	26.4303	26.5773
H0YCY6;A0A140VJH7;A0A024R529;Q3LXA3;I3L252;Q9UFX5;E9PQR1;E9PJG8;A0AUP5	H0YCY6;A0A140VJH7;A0A024R529;Q3LXA3;I3L252;Q9UFX5	Bifunctional ATP-dependent dihydroxyacetone kinase/FAD-AMP lyase (cyclizing);ATP-dependent dihydroxyacetone kinase;FAD-AMP lyase (cyclizing)	TKFC;DAK;DKFZp586B1621			17.8	54.661	0.193977	0.916096	0.0622972	0.505535	0.24381	0.853464	-0.0874608	-0.617349	24.7985	24.5212	24.7761	24.5947	24.8104	24.8776	24.4711	24.687	24.8622
A0A024R534;O94776	A0A024R534;O94776	Metastasis-associated protein MTA2	MTA2			45.5	75.022	0.887551	0.622887	-0.106265	-1.90458	0.194047	0.885188	-0.027696	-0.505695	28.5988	28.6226	28.4927	28.5176	28.389	28.4887	28.3626	28.4592	28.4905
E9PJ81;E9PRQ7;A0A024R598;A0A024R539;Q04323;B4DNC6;A0A087WTZ5;B4DU88;Q05BV2;B4E0P8	E9PJ81;E9PRQ7;A0A024R598;A0A024R539;Q04323;B4DNC6;A0A087WTZ5	UBX domain-containing protein 1	UBXN1;LOC51035			12.8	32.611	0.214424	0.906882	-0.525501	-0.551987	0.357017	0.805102	0.815502	0.857466	23.9828	23.8836	23.7484	21.4527	24.4212	24.1644	24.1831	24.2405	24.0612
A0A024R565;Q9UI30;F5GYQ2;F5GX77	A0A024R565;Q9UI30;F5GYQ2;F5GX77	Multifunctional methyltransferase subunit TRM112-like protein	HSPC152;TRMT112			28	14.199	2.09442	0.346885	0.0952676	4.89967	0.0353734	0.978351	0.00725555	0.104533	25.0292	25.0302	24.9989	25.0828	25.1381	25.1233	25.0733	25.0375	25.2552
B2R5U3;A0A024R571;Q9H4M9;B4DMV9;B4DR44;B4DTR4;B4DZH9;C9JC03;C9J2Z4;C9JDQ8;C9JIJ3;C9IZH1;Q8NCJ3;B4DLA1;A0A024R0S6;Q9NZN4	B2R5U3;A0A024R571;Q9H4M9;B4DMV9;B4DR44;B4DTR4;B4DZH9;C9JC03;C9J2Z4	EH domain-containing protein 1	EHD1			54.9	60.626	0.574798	0.75339	-0.092261	-1.29121	1.20173	0.524766	0.246319	2.55689	28.0511	28.2644	28.2305	28.0647	28.0609	28.1437	28.219	28.2706	28.5186
A0A024R5A3;A0A024R580;B2RDI5;P07384;B4DWH5;E9PL37;E9PRM1;B4DS85;E9PLX0;E9PJJ3;E9PLC9;E9PMC6;E9PJA6;E9PSA6;E9PQB3;E9PIA9	A0A024R5A3;A0A024R580;B2RDI5;P07384;B4DWH5	Calpain-1 catalytic subunit	CAPN1			22.7	81.467	0.513402	0.783034	0.07418	1.17094	0.0107142	0.993788	-0.0115331	-0.0324985	27.2611	27.1907	27.1922	27.3005	27.1814	27.3846	27.915	27.2083	26.7086
A0A024R582;J3KMZ8;Q92785;E9PN04	A0A024R582;J3KMZ8;Q92785;E9PN04	Zinc finger protein ubi-d4	DPF2			13.3	44.155	0.0720771	0.973406	0.286495	0.205691	0.527993	0.710979	1.12661	1.19961	21.5578	24.7505	24.529	24.5964	25.0591	22.0413	25.1015	24.9868	24.9884
A0A024R588;A0A024R566;B4DJU4;A0A024R5D9;A0A024R572;Q15637;B4DSE4;B4DX42;Q14820;F8WEV5;C9J792;H7BZT1;H7C561	A0A024R588;A0A024R566;B4DJU4;A0A024R5D9;A0A024R572;Q15637;B4DSE4;B4DX42	Splicing factor 1	SF1			32.7	59.711	0.0766246	0.973122	0.0122166	0.217788	0.813794	0.593762	0.0984173	1.75823	28.7844	28.8764	28.9451	28.865	28.9412	28.8363	28.9353	28.9304	29.072
A8K0D4;A0A024R5A7;Q9Y6J9;E9PP94;B4DVM4	A8K0D4;A0A024R5A7;Q9Y6J9	TAF6-like RNA polymerase II p300/CBP-associated factor-associated factor 65 kDa subunit 6L	TAF6L			11.3	67.741	0.428432	0.810585	0.411124	1.00238	0.62291	0.680822	-0.574528	-1.38503	22.3801	23.5835	23.5781	23.696	23.4131	23.6659	23.2411	22.2311	23.5793
A0A024R5C4;B7Z3E3;B7Z8W8;O95197;Q7RTN4;B7Z4M1;F5H891;F5GWG7;F5H617;B7Z361	A0A024R5C4;B7Z3E3;B7Z8W8;O95197;Q7RTN4;B7Z4M1;F5H891;F5GWG7;F5H617;B7Z361	Reticulon;Reticulon-3	RTN3			21.2	25.609	0.494116	0.783916	-1.25236	-1.13295	0.275658	0.839955	0.837557	0.686577	25.4625	25.7229	25.9984	26.0354	25.0258	22.3656	24.3829	25.3075	26.249
A0A024R5C5;P11498;A0A494C016;A0A494C101;A0A494C0T2;E9PRE7;E9PS68;A0A494BZT5	A0A024R5C5;P11498;A0A494C016	Pyruvate carboxylase;Pyruvate carboxylase, mitochondrial	PC			68.2	129.63	0.830647	0.635105	-0.207128	-1.79151	0.86349	0.591563	0.187706	1.85663	33.7934	34.061	33.8339	33.6828	33.8309	33.5533	33.7547	33.9234	33.952
A0A024R5F3;H7BXH2;E9PKF6;Q5H9R7;B4DTT7;B4DYU6;H0YEN2;E9PQP7;B4E0C2;Q7L294;E9PK08;B4DP39	A0A024R5F3;H7BXH2;E9PKF6;Q5H9R7;B4DTT7;B4DYU6;H0YEN2;E9PQP7	Serine/threonine-protein phosphatase 6 regulatory subunit 3	SAPS3;PPP6R3			10.1	88.951	0.33615	0.861494	-0.0958227	-0.814328	0.769618	0.601411	0.364381	1.67134	24.4708	24.8394	24.5991	24.6185	24.5462	24.4571	24.6561	25.3288	24.73
B2RAQ8;A0A024R5F4;P50416;Q8WZ48;H3BMD2;H3BP22;H3BUV7;H3BUJ0	B2RAQ8;A0A024R5F4;P50416	Carnitine O-palmitoyltransferase 1, liver isoform	CPT1A			35.3	88.339	0.0183252	0.999396	0.0098877	0.0551247	1.14584	0.5222	-0.224004	-2.43651	28.1469	28.7131	28.6104	28.55	28.4147	28.5353	28.3596	28.3551	28.1134
E9PM00;X5DRD7;A8K0D2;A0A1Y1B909;A0A024R5F7;Q9UBM7;E9PJ54;X5D9E1;A0A0S2Z3S3;X5DNI9;E9PRL8;E9PQ71;E9PIP9;A0A0S2Z3N8;E9PLZ2;A0A0S2Z3U5;B4E1K5	E9PM00;X5DRD7;A8K0D2;A0A1Y1B909;A0A024R5F7;Q9UBM7;E9PJ54;X5D9E1;A0A0S2Z3S3;X5DNI9;E9PRL8;E9PQ71;E9PIP9;A0A0S2Z3N8	7-dehydrocholesterol reductase	DHCR7			18.2	29.189	0.441968	0.805834	-0.189025	-1.02946	1.25644	0.504964	-0.442687	-2.6769	24.9384	25.4539	25.4587	25.1951	24.9798	25.109	24.8052	24.8049	24.3458
A0A024R5H6;Q6VY07;B4DF77;E9PNZ9;E9PPK2;E9PSE1;F8W0B1;E9PSG7;E9PNG7;H0YF56;F8VW41;Q86VP3	A0A024R5H6;Q6VY07;B4DF77	Phosphofurin acidic cluster sorting protein 1	PACS1			16.2	104.9	0.461597	0.799706	-0.104561	-1.06856	0.502205	0.729929	0.177193	1.1489	25.4865	25.568	25.4636	25.4889	25.4991	25.2164	25.4832	25.4294	25.8234
A0A024R5K1;Q9BR76;Q9NSK3;A0A087WW53;F5H390;Q59F81;B4DIU2;F5H0D2	A0A024R5K1;Q9BR76;Q9NSK3;A0A087WW53;F5H390;Q59F81;B4DIU2	Coronin;Coronin-1B	CORO1B;DKFZp762I166			27.8	54.234	1.03855	0.551781	0.310271	2.21118	0.385827	0.797828	-0.199155	-0.916388	26.5862	26.6861	26.9867	27.2032	27.0235	26.9631	26.4642	26.9857	27.1425
A0A024R5K3;E9PPW7;O00217;E9PKH6;Q53G17;E9PN51;F8W9K7;B4DYI3	A0A024R5K3;E9PPW7;O00217;E9PKH6;Q53G17;E9PN51;F8W9K7;B4DYI3	NADH dehydrogenase [ubiquinone] iron-sulfur protein 8, mitochondrial	NDUFS8			34.9	19.213	1.66651	0.44592	1.21959	3.66148	1.02419	0.54694	0.645704	2.18153	23.8392	24.5671	24.2264	24.9551	25.8434	25.493	26.3326	25.8327	26.0633
B3KQL8;A0A024R5K5;Q9BVK2;H0YDQ1;H0YDV4;H0YDD3;H0YCV0;H0YEE0	B3KQL8;A0A024R5K5;Q9BVK2;H0YDQ1;H0YDV4;H0YDD3;H0YCV0;H0YEE0	Probable dolichyl pyrophosphate Glc1Man9GlcNAc2 alpha-1,3-glucosyltransferase	ALG8			4.8	60.099	0.506952	0.783795	0.732973	1.15825	0.101121	0.938972	-0.0791868	-0.281511	23.3902	24.4696	22.4704	24.5763	24.2594	23.6934	24.2671	23.8872	24.1373
A0A024R5K6;O95298;E9PRJ5;E9PM14;A0A087WUM3;E9PQ53;E9PRQ4;Q8NI46;A0A087WY27	A0A024R5K6;O95298;E9PRJ5;E9PM14;A0A087WUM3;E9PQ53	NADH dehydrogenase [ubiquinone] 1 subunit C2;NADH dehydrogenase [ubiquinone] 1 subunit C2, isoform 2	NDUFC2;KCTD14;NDUFC2-KCTD14			30.3	14.187	0.357863	0.853941	-0.0657889	-0.859208	0.848795	0.59322	-0.166493	-1.82745	25.4807	25.5031	25.6751	25.5264	25.396	25.5391	25.3906	25.408	25.1634
A0A024R5K8;P50454;B4DN87;A8K259;E9PPV6;E9PR70;E9PKH2;E9PK86;E9PMI5;E9PNX1;E9PJH8;E9PIG2;E9PRS3;Q9NPA9;E9PQ34;H0YEP8;E9PLA6	A0A024R5K8;P50454;B4DN87;A8K259;E9PPV6;E9PR70;E9PKH2;E9PK86;E9PMI5	Serpin H1	SERPINH1			51	46.44	0.148112	0.939242	0.041467	0.397894	1.25522	0.505047	-0.191059	-2.67421	28.8787	28.7673	29.1056	29.0074	28.9015	28.9672	28.641	28.8104	28.8515
B7Z7Q6;A0A024R5L0;P42785;E9PQB5;E9PL85;E9PQN3;E9PKN6;E9PIG4;E9PL49;E9PLY4;E9PNF7;E9PNJ1;E9PR42;B3KR26	B7Z7Q6;A0A024R5L0;P42785;E9PQB5;E9PL85;E9PQN3;E9PKN6;E9PIG4;E9PL49;E9PLY4;E9PNF7;E9PNJ1	Lysosomal Pro-X carboxypeptidase	PRCP			11.8	43.933	0.223469	0.90745	0.232347	0.572271	0.718511	0.624394	-0.616963	-1.57134	22.3768	23.6326	23.4807	23.5515	23.2369	23.3988	23.1052	23.2137	22.0174
B5BU72;A0A024R5L7;A8K5U9;A0A024R5P1;Q13492;Q8N6B4;E9PJT1;E9PK13;H0YCY1;E5RFU0;E5RHK9;H0YE97;E9PI56;E9PKP6;E5RFC6;E5RK51;E5RIJ5;E9PLJ8;H0YEY8;B4DLM1;H0YD48;H0YEF7;H0YEH1;E5RGY9;E9PDG8;H0UI15;O60641	B5BU72;A0A024R5L7;A8K5U9;A0A024R5P1;Q13492	Phosphatidylinositol-binding clathrin assembly protein	PICALM			20.3	66.393	0.477684	0.794238	0.160269	1.10047	0.483067	0.744521	0.143104	1.11112	25.219	24.8971	25.0194	24.9927	25.3691	25.2545	25.4507	25.2289	25.3659
A0A087WY61;A0A024R5M9;Q4LE64;Q14980;Q59HB8;A0A024R5G4;Q7Z757;Q96HN5;H0YFY6;F5H4J1;A8K394;Q3SYK8;F5H6Y5;K4DIE0;Q9UNL7;Q9UPG3;F5H763;Q86XH4;F5H0Z7;G1UI36;F5H2F3;F5H3L6;F5H1L0;F5GZW1;F8W6T3;F5GWK2;F5H073;F5H068;F5H7R5;F5H4Y4;F5GWA2	A0A087WY61;A0A024R5M9;Q4LE64;Q14980;Q59HB8;A0A024R5G4;Q7Z757	Nuclear mitotic apparatus protein 1	NUMA1;NUMA1 variant protein			51.6	236.16	0.830302	0.634415	-0.164383	-1.79083	1.07672	0.530532	-0.294164	-2.29055	30.4132	30.4152	30.3578	30.3347	30.0521	30.3063	29.8606	30.1195	29.8304
A0A024R5P0;Q13153;E9PM17;B7Z3K0;B3KNX7;A8KAN3;B7Z302;H0YCG5;H0YCM0	A0A024R5P0;Q13153;E9PM17;B7Z3K0;B3KNX7;A8KAN3;B7Z302	Non-specific serine/threonine protein kinase;Serine/threonine-protein kinase PAK 1	PAK1			11.4	60.646	0.497594	0.783769	0.451761	1.13981	0.15508	0.909009	-0.0861473	-0.414588	23.04	21.7484	22.64	22.7191	22.9955	23.069	22.6183	22.7126	23.1944
A0A024R5Q7;P30520;B4E1L0	A0A024R5Q7;P30520;B4E1L0	Adenylosuccinate synthetase isozyme 2	ADSS			33.8	50.097	0.228141	0.906131	0.0722109	0.582691	0.864311	0.591346	0.204361	1.85826	26.9099	26.988	26.7892	26.9574	27.1628	26.7836	27.1676	27.1898	27.1594
A0A024R5Q8;Q05D32;H0YNU2;H0YNW9;H0YMH7	A0A024R5Q8;Q05D32;H0YNU2;H0YNW9;H0YMH7	CTD small phosphatase-like protein 2	CTDSPL2			4.1	52.998	0.0613056	0.97748	0.0337963	0.176674	0.518719	0.717248	0.159956	1.18139	24.0217	24.5675	24.4581	24.3182	24.5677	24.2628	24.5694	24.6972	24.362
A8K8N5;A0A024R5S4;P40818;A0A075B720;Q05CD9;Q05DF5;B4DUC6	A8K8N5;A0A024R5S4;P40818;A0A075B720;Q05CD9;Q05DF5	Ubiquitin carboxyl-terminal hydrolase;Ubiquitin carboxyl-terminal hydrolase 8	USP8			4.3	127.49	1.10591	0.526548	0.483662	2.35182	0.687364	0.646373	0.245232	1.51058	22.7628	22.8409	23.251	23.2654	23.7111	23.3291	23.8091	23.5237	23.7085
A0A024R5S5;O75822;H0YGJ7;H0YLP3	A0A024R5S5;O75822	Eukaryotic translation initiation factor 3 subunit J	EIF3S1;EIF3J			34.5	29.062	0.550136	0.758145	0.216426	1.243	0.788568	0.601602	0.233791	1.70855	24.8065	24.5683	24.4064	24.5772	24.8281	25.0253	24.9589	25.0688	25.1041
A0A024R5T1;A0A024R5Z0;Q99081;B4DZH5;B4DGI9;F5GY10;H0YNQ5;B4DZP2;B4DH96;B4DZ50;H0YNP8;H3BRK2;H3BNF4;H0YML2	A0A024R5T1;A0A024R5Z0;Q99081;B4DZH5;B4DGI9;F5GY10	Transcription factor 12	TCF12			33.6	72.964	0.0131429	0.999456	-0.00863012	-0.0397587	2.24056	0.374595	-0.586013	-5.38564	26.4839	27.0292	27.1313	26.9362	26.71	26.9724	26.1441	26.353	26.3634
A0A024R5V2;Q8TDJ6;H0YLM8;Q6ZP26;Q8WTV7	A0A024R5V2;Q8TDJ6	DmX-like protein 2	DMXL2			3.2	339.64	0.237676	0.90226	-0.129049	-0.603832	0.0648046	0.96076	-0.0263392	-0.186157	23.8615	24.4837	23.8882	24.075	23.8493	23.9219	24.1693	23.7662	23.8317
A0A024R5X7;O76031;Q9H072;H0YM48	A0A024R5X7;O76031;Q9H072	ATP-dependent Clp protease ATP-binding subunit clpX-like, mitochondrial	CLPX;DKFZp586J151			15.2	69.223	1.21381	0.535686	-0.298995	-2.58319	0.186746	0.89066	0.0703004	0.488895	24.9993	25.0092	25.2007	24.7224	24.635	24.9547	24.643	24.8671	25.013
A0A024R5Z7;P07355;V9HW65;H0YN42;H0YMD0;H0YMU9;A6NMY6;H0YM50;B4DNH8;H0YKS4;H0YNP5;H0YMM1;B3KRQ1;H0YN28;H0YL33;H0YKZ7;H0YLV6;H0YMT9;H0YKX9;H0YKL9;H0YMW4;H0YNA0;H0YKV8;H0YN52;H0YMD9;H0YNB8;H0YKN4;H0YLE2	A0A024R5Z7;P07355;V9HW65;H0YN42;H0YMD0;H0YMU9;A6NMY6;H0YM50;B4DNH8;H0YKS4;H0YNP5	Annexin;Annexin A2;Putative annexin A2-like protein	ANXA2;HEL-S-270;ANXA2P2			72.3	38.604	0.798472	0.638929	0.165696	1.72803	1.01647	0.547638	0.105719	2.16563	30.1685	29.8435	30.0612	30.1957	30.1992	30.1756	30.2008	30.3288	30.3579
A0A024R608;P05386;Q7Z612;Q6ICQ4;Q6FG99	A0A024R608;P05386;Q7Z612;Q6ICQ4;Q6FG99	60S acidic ribosomal protein P1	RPLP1			89.5	11.514	0.0430956	0.988605	0.0351798	0.126374	0.787842	0.601671	0.48498	1.70712	27.0778	26.669	27.4506	26.9068	27.4247	26.9714	27.8737	27.7589	27.1252
A0A024R611;P31146;Q59G88;H3BRY3;H3BTU6;H3BRJ0;Q6ZW98;H3BNA2;H3BU76;B4DJS1;H3BSL1	A0A024R611;P31146;Q59G88;H3BRY3;H3BTU6;H3BRJ0	Coronin;Coronin-1A	CORO1A			15.6	51.026	0.301434	0.880231	0.120587	0.741551	0.436949	0.768707	0.153429	1.01944	24.6619	24.9772	24.6688	24.6404	25.0002	25.0291	24.906	25.0289	25.1951
Q5U086;A0A024R625;P60510;H3BTA2;H3BV22;I3L4X0;H3BPN5;H3BVE3	Q5U086;A0A024R625;P60510;H3BTA2;H3BV22	Serine/threonine-protein phosphatase;Serine/threonine-protein phosphatase 4 catalytic subunit	PPP4C			22.8	35.079	0.123733	0.947034	0.0446046	0.338391	0.245772	0.852385	-0.131986	-0.621661	25.4457	25.1834	25.4008	25.2481	25.3244	25.5912	24.8993	25.348	25.5204
Q6NUM7;A0A024R640;Q9NUQ2	Q6NUM7;A0A024R640;Q9NUQ2	1-acyl-sn-glycerol-3-phosphate acyltransferase epsilon	AGPAT5			12.4	41.165	0.376345	0.845025	0.103665	0.897072	0.156993	0.907739	0.0509879	0.41915	24.8307	25.0542	24.9563	24.8624	25.1149	25.175	25.2039	25.1459	24.9555
G3V4W4;A0A024R649;Q96EK6;G3V5E4	G3V4W4;A0A024R649;Q96EK6	Glucosamine 6-phosphate N-acetyltransferase	GNPNAT1			39.9	18.057	0.134089	0.941895	0.0320816	0.363884	0.517614	0.718601	0.175314	1.17922	24.7022	24.6966	24.7325	24.5691	24.8487	24.8098	24.6774	25.0367	25.0395
A0A024R652;P11586;V9GYY3;A0A384N5Y3;F5H2F4;B7Z809;V9GZ78;A0A494C1T2;V9GY75	A0A024R652;P11586;V9GYY3;A0A384N5Y3;F5H2F4;B7Z809;V9GZ78;A0A494C1T2	C-1-tetrahydrofolate synthase, cytoplasmic;Methylenetetrahydrofolate dehydrogenase;Methenyltetrahydrofolate cyclohydrolase;Formyltetrahydrofolate synthetase;C-1-tetrahydrofolate synthase, cytoplasmic, N-terminally processed	MTHFD1			52.2	101.53	0.943525	0.590107	0.0849209	2.01699	0.335237	0.814202	0.0496178	0.812431	29.8401	29.7959	29.8032	29.8319	29.8925	29.9695	29.9792	29.8564	30.0072
A0A024R663;Q86UP2;G3V4Y7;B7Z6P3;B3KWP6;H0YJZ8;G3V5G2;B3KP76;G3V5P0;H0YJP2;H0YJV5;Q6PDF7;Q3SWV9	A0A024R663;Q86UP2	Kinectin	KTN1			49.2	156.27	0.794137	0.643825	-0.0990779	-1.7195	1.02896	0.545594	-0.128091	-2.19136	30.23	30.0979	30.1854	30.1082	29.9871	30.1207	29.8863	29.9245	30.0209
A0A024R687;Q96AC1;H0YJ34;A0A0U1RRM8;G3V281;G3V5R2;H0YJB6;G3V3J0;Q54A15;B2RAX1;Q9BQL6;G3V379;Q5JWV4;Q49AC8;G3V1L6	A0A024R687;Q96AC1;H0YJ34;A0A0U1RRM8	Fermitin family homolog 2	PLEKHC1;FERMT2			60	77.86	1.20418	0.536111	0.112414	2.56221	1.68475	0.428138	0.126827	3.70935	29.7212	29.5823	29.6837	29.7711	29.8012	29.7522	29.8762	29.8653	29.9635
A0A024R694;P12814;H9KV75;B7Z565;Q86TX4;B4DFY0;B3KUX9;G3V2W4;G3V2N5;B4DRP5;B7Z2W3;H7C5W8;A1L0V1;H0YJW3;B7Z2N5;A0A494C1A0;P35609;H0YJ11;G3V2X9;B2R8Y4;Q08043;B4DZQ2;A0A087WSZ2;B7Z4P6;B7Z4K1;Q5ZEZ4;A0A494C033;A0A494C166;B7Z4V1;Q59FD9;F6THM6;G3V5M4;G3V2E8;A0A494C060;Q4VAM3;A0A494C0Q3;A0A494C031;G3V380;B7Z4P8	A0A024R694;P12814;H9KV75;B7Z565;Q86TX4	Alpha-actinin-1	ACTN1			63.3	103.06	0.873484	0.623803	0.0649192	1.87652	0.989999	0.556215	0.0608927	2.11139	29.3207	29.2306	29.3191	29.3235	29.3573	29.3845	29.4454	29.4315	29.371
A0A384MDT7;A0A024R6B5;P54652;B3KUS2	A0A384MDT7;A0A024R6B5;P54652;B3KUS2	Heat shock-related 70 kDa protein 2	HSPA2			23.8	69.944	1.65694	0.443563	0.301321	3.63653	0.208376	0.873785	0.102014	0.538336	22.6265	22.5601	22.5403	22.8028	23.0342	22.7939	23.2159	22.6435	23.0775
B2RCI6;A0A024R6C4;A0A024R6F4;P49757;G3V3Z8;A0A024R684;A0A024R681;Q86SW6;G3V3M5;Q86SW5;G3V3R1;B4DUD7	B2RCI6;A0A024R6C4;A0A024R6F4;P49757;G3V3Z8;A0A024R684;A0A024R681;Q86SW6	Protein numb homolog	NUMB			14.1	69.358	0.129047	0.943441	-0.0735486	-0.351512	0.352274	0.808281	-0.486889	-0.847697	24.3482	24.8496	24.7887	24.4931	24.4136	24.8592	23.0089	24.4546	24.8417
A0A024R6C9;P36957;Q6IBS5;Q86TQ8;Q86SW4;Q86TW7;B7Z6J1;H0YJF9;G3V3F0;Q16187;G3V5M3;Q6LEQ7	A0A024R6C9;P36957;Q6IBS5;Q86TQ8;Q86SW4;Q86TW7	Dihydrolipoyllysine-residue succinyltransferase component of 2-oxoglutarate dehydrogenase complex, mitochondrial	DLST			39.1	48.755	0.221631	0.907808	-0.0183729	-0.568162	1.40683	0.477082	0.117133	3.01931	28.4122	28.4312	28.4219	28.4271	28.3403	28.4427	28.5051	28.5641	28.4922
A0A024R6D1;Q8TD19;Q6PKF2;B3KY50;G3V459;G3V2Z5;G3V5V0;REV__Q5SQT3;REV__Q9HA11;REV__Q9P0M6;REV__A0A024QZP6	A0A024R6D1;Q8TD19	Serine/threonine-protein kinase Nek9	NEK9			18.6	107.15	0.367398	0.850901	-0.0364469	-0.878778	0.0393672	0.975864	-0.0111885	-0.115869	27.3308	27.3743	27.3197	27.2834	27.253	27.3791	27.4135	27.3479	27.1205
A0A024R6D4;P84090;G3V279	A0A024R6D4;P84090;G3V279	Enhancer of rudimentary homolog	ERH			51	12.259	0.00641511	0.998389	0.00144768	0.0195519	0.345233	0.811907	0.0779057	0.833156	27.0296	27.2159	27.1139	27.0291	27.2044	27.1302	27.355	27.1375	27.1049
Q53H94;A0A024R6G4;Q02252;Q53FN8;G3V4Z4;O43573	Q53H94;A0A024R6G4;Q02252;Q53FN8	Methylmalonate-semialdehyde dehydrogenase [acylating], mitochondrial	ALDH6A1			28.6	57.825	0.48426	0.791228	0.107023	1.11348	0.536644	0.706381	-0.0736249	-1.21657	26.3214	26.6003	26.3707	26.4818	26.5093	26.6224	26.4163	26.5491	26.4272
A0A024R6G6;O75438;Q3MHU6	A0A024R6G6;O75438;Q3MHU6	NADH dehydrogenase [ubiquinone] 1 beta subcomplex subunit 1	NDUFB1			36.2	6.9611	0.0524089	0.981913	-0.0281353	-0.152303	0.694126	0.643875	0.237493	1.52376	23.9432	24.4715	24.4738	24.1886	24.3728	24.2427	24.6845	24.6158	24.2163
B3KN45;A0A024R6H0;Q9P2I0;B3KMI0;H0YJF4	B3KN45;A0A024R6H0;Q9P2I0;B3KMI0	Cleavage and polyadenylation specificity factor subunit 2	CPSF2			23.9	78.191	0.126076	0.946163	-0.0551999	-0.344188	0.078798	0.953237	0.0232328	0.223538	25.5017	25.7757	25.2843	25.6137	25.3862	25.3961	25.3513	25.5154	25.599
A0A024R6H1;O15270;H0YJV2	A0A024R6H1;O15270	Serine palmitoyltransferase 2	SPTLC2			26	62.924	0.47243	0.793642	0.109739	1.09006	0.109639	0.934511	-0.0385195	-0.303144	25.0598	25.3668	25.3225	25.3063	25.3585	25.4135	25.1629	25.2361	25.5637
A0A024R6I3;Q53GF9;P49755;B4DZH3;G3V2K7;B4DL12	A0A024R6I3;Q53GF9;P49755;B4DZH3	Transmembrane emp24 domain-containing protein 10	TMED10			28.8	24.976	0.0518768	0.982364	-0.0189718	-0.150834	0.241042	0.856777	-0.168872	-0.611258	26.756	26.6994	26.6944	26.9027	26.4736	26.7166	26.0355	26.7595	26.7912
G3V5E1;A0A024R6K1;O75909;G3V2Q3;G3V235	G3V5E1;A0A024R6K1;O75909;G3V2Q3	Cyclin-K	CCNK			19.6	43.404	0.0226553	0.996378	0.0113735	0.0678364	1.93594	0.361333	-0.403854	-4.41126	25.4579	25.9749	25.8445	25.8619	25.6489	25.8005	25.3949	25.4644	25.2406
A0A024R6K8;P23381;G3V3H8;G3V3Y5;H0YJP3;G3V277;B4DTK8;G3V2F2;G3V3R3;G3V4S4;G3V313;G3V339;G3V2C0;G3V4C7;G3V4N8;G3V5W1;G3V3S7;G3V3X0;G3V3P2;G3V227;G3V5H5;P78534;G3V4A3;G3V4Q0;G3V4N0;G3V423;G3V5U1;G3V456;G3V2Y7	A0A024R6K8;P23381	Tryptophan--tRNA ligase, cytoplasmic;T1-TrpRS;T2-TrpRS	WARS			41.4	53.165	1.11664	0.528154	0.156414	2.37449	0.334351	0.814819	0.0951099	0.810589	27.8498	27.7893	27.7915	27.9035	28.0922	27.9041	27.965	27.9602	28.2599
G3V2F4;Q32Q25;E7EPD8;B2RDI0;A0A024R6L5;Q9NUW8;H0YJ44	G3V2F4;Q32Q25;E7EPD8;B2RDI0;A0A024R6L5;Q9NUW8;H0YJ44	Tyrosyl-DNA phosphodiesterase 1	TDP1			7.8	64.827	0.27373	0.897612	0.648755	0.682428	0.143203	0.920771	0.297614	0.386053	22.2188	24.0983	21.691	22.104	23.8572	23.9933	22.6872	23.9187	24.2413
G3XAH6;A0A024R6M3;P51003;B4DHB8;B4DYF4;A0A0C4DGK1;G3V3I9;G3V457;A0A024R6J7;A4D1Z6;A0ZTA0;Q9NRJ5;G3V2A0;H0YJ00;B7ZA53;B4DZL2	G3XAH6;A0A024R6M3;P51003;B4DHB8;B4DYF4;A0A0C4DGK1;G3V3I9	Poly(A) polymerase alpha	PAPOLA			18.4	80.625	0.604849	0.734654	0.14003	1.34983	0.41346	0.785288	0.0720711	0.972302	25.745	25.619	25.9026	25.7963	26.0138	25.8766	25.9026	25.9654	26.035
A0A024R6N2;Q9Y5S2;H0YLY0;Q86XZ8;Q86TR8;H0Y6V3;H0Y7V8;A0A0U1RRC3;B4DZE2;B4DM55;E5KR07;E5KR05;E5KR06;X5D8Z6;M0R333;X5DNJ6;Q59FU6;Q09013	A0A024R6N2;Q9Y5S2	Non-specific serine/threonine protein kinase;Serine/threonine-protein kinase MRCK beta	CDC42BPB			14.5	194.31	0.296461	0.883131	-0.0554587	-0.731012	0.365488	0.807566	-0.103614	-0.874864	26.8292	26.859	26.6788	26.8057	26.6339	26.7609	26.4477	26.8171	26.6249
Q6IBU0;A0A024R6Q1;P55010;H0YLZ1;Q32Q19;Q05DF3;H0YN40;H0YMJ8;H0YM54;H0YK11;H0YK29;B4DEN3	Q6IBU0;A0A024R6Q1;P55010	Eukaryotic translation initiation factor 5	EIF5			28.1	49.151	0.374837	0.844173	0.0871169	0.893994	1.00572	0.547126	0.193012	2.14356	27.3338	27.078	27.3391	27.2567	27.3413	27.4142	27.5938	27.3758	27.6216
A0A024R6Q2;Q96FX7;Q96B39;H0Y2Q1	A0A024R6Q2;Q96FX7;Q96B39;H0Y2Q1	tRNA (adenine(58)-N(1))-methyltransferase catalytic subunit TRMT61A	C14orf172;TRMT61A			34.3	31.381	0.230556	0.906732	0.0947653	0.588059	0.180565	0.893122	0.0894629	0.47458	25.5912	25.9953	26.0484	25.9181	25.886	26.115	26.4087	25.8525	25.9264
A0A024R6S1;O60884;T2DN57;T2DPK5;A0A087WT48	A0A024R6S1;O60884	DnaJ homolog subfamily A member 2	DNAJA2			31.8	45.745	0.0403997	0.990144	0.0146135	0.118786	0.37699	0.802325	-0.0821915	-0.898388	26.579	26.4433	26.2271	26.5468	26.3112	26.4352	26.3642	26.2362	26.4463
H3BRS0;H3BM11;H3BRE9;H3BML6;A0A024R6T9;P23975;H3BMY5	H3BRS0;H3BM11;H3BRE9;H3BML6;A0A024R6T9;P23975;H3BMY5	Transporter;Sodium-dependent noradrenaline transporter	SLC6A2			6.1	33.163	0.385068	0.837618	0.101744	0.914844	0.0763262	0.954145	0.0143286	0.216996	24.219	23.9507	23.863	24.1165	24.059	24.1625	24.2255	24.022	24.1334
A0A024R6W0;P00505;A8K482;B4DY39	A0A024R6W0;P00505;A8K482	Aspartate aminotransferase;Aspartate aminotransferase, mitochondrial	GOT2			45.6	47.475	0.331689	0.865013	0.034558	0.80505	1.47491	0.483006	-0.0991548	-3.181	29.2388	29.1111	29.2018	29.1836	29.2186	29.2532	29.1034	29.0883	29.1662
B2R6U8;A0A024R6W2;O43809;H3BND3;H3BV41;Q5HYH5	B2R6U8;A0A024R6W2;O43809;H3BND3	Cleavage and polyadenylation specificity factor subunit 5	NUDT21			37	26.215	0.360296	0.855621	0.0711047	0.864208	0.145417	0.918986	0.0249583	0.391401	26.5656	26.4205	26.5961	26.4801	26.6262	26.6893	26.5953	26.6471	26.628
A0A024R6Y2;P61970;H3BRV9	A0A024R6Y2;P61970;H3BRV9	Nuclear transport factor 2	NUTF2			56.7	14.478	0.751316	0.659581	0.0972881	1.63547	0.724288	0.622029	0.241809	1.58262	27.5556	27.4817	27.4932	27.5026	27.6881	27.6317	27.5652	27.9692	28.0134
A0A024R6Z0;O43237;J3KRI4;J3KRZ2;B4DHD8;J3KSD2;H3BUM4;Q63HJ8;B4E2E0	A0A024R6Z0;O43237;J3KRI4	Cytoplasmic dynein 1 light intermediate chain 2	DYNC1LI2			16.3	54.099	0.609246	0.730571	0.143611	1.3584	0.791136	0.602008	-0.220833	-1.7136	24.9328	24.8758	25.0482	24.9178	25.1399	25.2299	25	24.7017	24.9235
A0A024R704;P78362;H7C5L6;H7C521;A8MPP7;A8MPY5;E7ETV6;Q59GF4;Q9UPE1;H7C2I2;D6RBM8;C9J2M4;C9JWF7	A0A024R704;P78362;H7C5L6	SRSF protein kinase 2;SRSF protein kinase 2 N-terminal;SRSF protein kinase 2 C-terminal	SRPK2			10.3	77.526	0.27015	0.898637	-0.0847664	-0.674712	0.885123	0.580818	0.286713	1.89973	24.9958	24.8336	24.8404	24.6035	24.8141	24.9979	24.9505	25.0426	25.2826
A0A024R705;Q9UN37;I3L4J1;Q9NXK5;Q9UF30;Q49AN7	A0A024R705;Q9UN37;I3L4J1;Q9NXK5;Q9UF30	Vacuolar protein sorting-associated protein 4A	VPS4A;DKFZp434E0418			19.9	48.897	0.0421437	0.989714	0.0182228	0.123699	0.060061	0.964288	0.034881	0.173287	25.2747	25.1515	25.0457	25.0559	25.0323	25.4384	25.0947	25.0242	25.5123
B3KY43;Q6DHZ2;A0A024R712;P31323;Q75MP1;O60380	B3KY43;Q6DHZ2;A0A024R712;P31323;Q75MP1	cAMP-dependent protein kinase type II-beta regulatory subunit	PRKAR2B			23.2	44.866	0.51688	0.777899	0.18437	1.17778	0.488202	0.741923	-1.63579	-1.12127	24.3763	24.4882	24.5766	24.8268	24.7928	24.3746	20.1606	24.8515	24.0748
B4DFL1;A0A024R713;P09622;E9PEX6;B4DMK9;F8WDM5;A0A1W2PR83;F2Z2E3	B4DFL1;A0A024R713;P09622;E9PEX6;B4DMK9	Dihydrolipoyl dehydrogenase;Dihydrolipoyl dehydrogenase, mitochondrial	DLD			37.7	48.899	0.829391	0.634009	-0.0709826	-1.78903	0.90595	0.583676	-0.165103	-1.94138	28.6046	28.4866	28.5695	28.4862	28.4486	28.513	28.1748	28.3154	28.4622
H7C268;A0A024R716;Q9H0V1	H7C268;A0A024R716;Q9H0V1	Transmembrane protein 168	TMEM168;FLJ13576			18.2	29.105	0.30811	0.879689	0.554274	0.755654	0.433206	0.771367	0.0693556	1.01195	21.6354	23.8943	23.7531	23.6482	23.5354	23.7619	23.7443	23.6775	23.7319
A0A024R718;P43490;A0A0C4DFS8;B7Z8W6;C9JF35;C9JG65;Q658Z1	A0A024R718;P43490;A0A0C4DFS8;B7Z8W6	Nicotinamide phosphoribosyltransferase	PBEF1;NAMPT			36	55.52	1.73961	0.424514	0.140813	3.85572	0.264051	0.848094	0.0361659	0.661525	27.157	27.26	27.1891	27.3027	27.3588	27.367	27.3379	27.3191	27.48
A0A024R725;A0A3B3IRL5;C9J381;B4DNJ7;Q6ZNB1;Q5H9Q6;P20839;B3KRZ3;C9K0R9;C9J029;H7C5T1;H7C511	A0A024R725;A0A3B3IRL5;C9J381;B4DNJ7;Q6ZNB1;Q5H9Q6;P20839;B3KRZ3	Inosine-5-monophosphate dehydrogenase;Inosine-5-monophosphate dehydrogenase 1	IMPDH1;IMPDH;DKFZp781N0678			23.7	40.984	2.00337	0.373159	0.52981	4.61442	0.259326	0.848968	-0.118476	-0.651271	24.9771	24.9302	25.0929	25.5335	25.7084	25.3477	25.1139	25.5794	25.5408
A0A024R745;Q16718;F8WAS3;A0A087X1G1;H7BYD0;C9IZN5;A0A024R736;A0A024R772;A0A087WXR5	A0A024R745;Q16718;F8WAS3;A0A087X1G1;H7BYD0;C9IZN5	NADH dehydrogenase [ubiquinone] 1 alpha subcomplex subunit 5	NDUFA5			43.1	13.459	0.0358706	0.99009	0.00785955	0.105948	0.609441	0.684448	0.194765	1.35878	24.0493	24.1234	24.2063	24.1092	24.246	24.0474	24.5237	24.0804	24.3827
A0A0C4DG51;A8K6U0;A0A024R746;Q9NP80	A0A0C4DG51;A8K6U0;A0A024R746;Q9NP80	Calcium-independent phospholipase A2-gamma	PNPLA8;IPLA2(GAMMA)			5.2	71.877	0.438748	0.807646	-0.112733	-1.02303	0.0257949	0.989264	0.0069809	0.0769821	23.8177	23.933	24.1574	23.848	23.7801	23.9418	23.7084	23.9388	23.9437
A0A024R753;Q9NW13;B4DJ90;C9JAA9;H7C5G8;C9JE21;A0A0S2Z5E5	A0A024R753;Q9NW13	RNA-binding protein 28	RBM28			26.4	85.737	0.443696	0.807613	-0.0612043	-1.03291	0.0467259	0.970437	0.00673485	0.136534	28.393	28.5154	28.5555	28.4118	28.3777	28.4908	28.4889	28.3654	28.4461
A0A024R784;O15164;B4DYZ9;Q6ZSA6	A0A024R784;O15164;B4DYZ9;Q6ZSA6	Transcription intermediary factor 1-alpha	TRIM24			8.7	113.02	0.869593	0.626499	0.204529	1.86877	1.14405	0.519509	-0.275651	-2.43271	25.1361	25.1651	25.3848	25.3061	25.5697	25.4238	25.3219	25.0468	25.1039
B2R6H7;A0A024R794;Q9Y5L0;E9PFH4;C9J7E5;B3KMX1;B3KM69	B2R6H7;A0A024R794;Q9Y5L0;E9PFH4;C9J7E5;B3KMX1;B3KM69	Transportin-3	TNPO3			24.4	104.23	0.112343	0.950709	0.0441195	0.309956	0.0406327	0.976607	-0.0129846	-0.119443	26.5233	26.8466	26.7379	26.911	26.5485	26.7807	26.7803	26.7206	26.7003
A0A024R7A8;P15121;Q59EL5;E9PCX2;E9PEF9;O15289	A0A024R7A8;P15121;Q59EL5;E9PCX2	Aldose reductase	AKR1B1			49.7	35.853	1.40081	0.502041	0.137875	3.00524	0.340707	0.809307	0.039711	0.823784	29.0582	28.9335	29.0704	29.131	29.175	29.1697	29.1551	29.1492	29.2906
K7EQA9;A0A024R7B7;Q16543;Q6FG59;K7EKQ2;K7EL68;K7EIU0;A1L0W4	K7EQA9;A0A024R7B7;Q16543;Q6FG59;K7EKQ2;K7EL68	Hsp90 co-chaperone Cdc37;Hsp90 co-chaperone Cdc37, N-terminally processed	CDC37			31.3	27.435	0.230188	0.904097	0.0881424	0.587241	0.405932	0.787338	0.163652	0.957123	26.764	26.8173	26.8307	26.674	27.1763	26.8261	27.1908	27.0759	26.9006
A0A2P1M8C0;A0A024R7C0;Q14145;K7EPZ3;K7EJ49;K7EJD8;K7ESE0	A0A2P1M8C0;A0A024R7C0;Q14145	Kelch-like ECH-associated protein 1	KEAP1			8.8	49.499	0.520489	0.77664	0.141239	1.18487	0.675571	0.648324	-1.08665	-1.4876	24.0142	23.6787	23.8016	24.0473	23.8372	24.0338	22.2737	24.335	22.0496
K7ES61;A0A024R7C5;Q9BYD3;X6RAY8;K7ELQ0;K7EKI4;K7ELF1;K7EJ73	K7ES61;A0A024R7C5;Q9BYD3;X6RAY8;K7ELQ0;K7EKI4;K7ELF1	39S ribosomal protein L4, mitochondrial	MRPL4			39.3	33.792	0.0534762	0.981415	0.0178057	0.155247	0.418328	0.781783	-0.262257	-0.982098	25.9495	26.2019	26.1768	26.2803	26.0002	26.1012	26.0628	26.1716	25.3605
A0A024R7C7;Q12906;F4ZW64;A8K590;Q59GP7;B4DFG4	A0A024R7C7;Q12906;F4ZW64;A8K590;Q59GP7;B4DFG4	Interleukin enhancer-binding factor 3	ILF3			71.9	95.337	0.286898	0.891281	-0.153758	-0.710658	0.41298	0.785201	-0.205139	-0.971334	28.6393	29.0072	29.172	28.9318	28.4889	28.9365	28.3154	28.5909	28.8355
A0A024R7G5;A0A024R7E9;A0A024R7D0;P49366;Q5J8M5;A0A087WZK0;B4DU50;M0R1T4;M0R253;M0QX43;A0A3B3IU31;M0R1T2;B4E3M2;M0R264;M0R0V2	A0A024R7G5;A0A024R7E9;A0A024R7D0;P49366;Q5J8M5;A0A087WZK0;B4DU50	Deoxyhypusine synthase	DHPS			24.6	34.978	3.98977	0.169333	1.81765	15.4516	2.27761	0.368	0.546124	5.5147	22.1852	22.2468	22.4544	24.0674	24.2776	23.9944	24.5733	24.7498	24.6546
A0A024R7E3;P26358;Q59FP7;I6L9H2;B3KVA0;K7EJL0;K7ENW7;K7EMU8;K7ENQ6;K7EIZ6;K7ERQ1;K7ELB1	A0A024R7E3;P26358;Q59FP7;I6L9H2	DNA (cytosine-5)-methyltransferase;DNA (cytosine-5)-methyltransferase 1	DNMT1			28.2	189.56	0.539458	0.762895	-0.104686	-1.22209	0.398051	0.792834	-0.0663999	-0.941189	28.6782	28.6789	28.4462	28.5561	28.4299	28.5032	28.3497	28.3922	28.5481
A0A024R7F1;K7ELL7;B4DJQ5;P14314;A2VCQ4;A0A0S2Z4D8;A0A0S2Z4W7;A0A0S2Z4A0;K7EPW7;K7EKX1;K7EJ70;A0A0C4DGP4	A0A024R7F1;K7ELL7;B4DJQ5;P14314;A2VCQ4;A0A0S2Z4D8;A0A0S2Z4W7;A0A0S2Z4A0	Glucosidase 2 subunit beta	PRKCSH			10.8	59.296	1.01021	0.557862	-0.45484	-2.15279	1.20259	0.525152	-0.521173	-2.55875	25.6735	25.1225	25.6736	25.0924	24.8325	25.1801	24.863	24.3204	24.3582
A0A024R7F7;B4DRY5;Q4LE60;O14787;A0A075B780;Q05D48;B3KPC8;K7ESC1;K7ESG1;K7ENW1;K7EMA3	A0A024R7F7;B4DRY5;Q4LE60;O14787;A0A075B780;Q05D48;B3KPC8	Transportin-2	TNPO2;TNPO2 variant protein			27.2	100.41	0.317115	0.873645	0.0898622	0.774591	0.319737	0.821194	0.131852	0.780089	25.868	26.1515	26.2	26.1451	26.2613	26.0827	26.5551	26.3281	26.0014
A0A2L2DH39;A0A2L2DH21;A0A2L2DH10;A0A2H4G245;A0A2H4G235;A0A2H4G1S8;A0A2H4G0V0;A0A2H4FX81;A0A2H4FX57;A0A2H4FX55;A0A2H4FWZ7;A0A024R7F9;Q92947;A0A1D6XXQ4;A0A1L3A5T2;B4DK85;A0A2H4FX52;A0A2H4FX70;A0A1L3A5U7;A0A2L2DH25;A0A2L2DH19;K7EKT3;B4DQF2;A0A2L2DH18;K7ES74;B4DUY0	A0A2L2DH39;A0A2L2DH21;A0A2L2DH10;A0A2H4G245;A0A2H4G235;A0A2H4G1S8;A0A2H4G0V0;A0A2H4FX81;A0A2H4FX57;A0A2H4FX55;A0A2H4FWZ7;A0A024R7F9;Q92947;A0A1D6XXQ4;A0A1L3A5T2;B4DK85;A0A2H4FX52;A0A2H4FX70;A0A1L3A5U7;A0A2L2DH25;A0A2L2DH19;K7EKT3;B4DQF2	Glutaryl-CoA dehydrogenase, mitochondrial	GCDH			13.7	48.157	0.116694	0.952909	-0.0911929	-0.320869	0.739982	0.618135	-0.588176	-1.6133	24.6092	24.9333	24.8751	25.105	24.2061	24.8329	24.4467	24.2971	23.6357
B4DQX5;A0A024R7G6;M0R165;A8K5P4;B4DME4;Q9UBC2;M0R2S2;A5PKY0;Q69YZ4;M0R3I1	B4DQX5;A0A024R7G6;M0R165;A8K5P4;B4DME4;Q9UBC2;M0R2S2;A5PKY0	Epidermal growth factor receptor substrate 15-like 1	EPS15L1			16	71.371	0.538677	0.762847	-0.197117	-1.22056	0.60124	0.685684	-0.86903	-1.3428	23.4444	23.8344	23.9131	23.6697	23.4288	23.5022	21.6005	22.5702	23.8228
A0A024R7G7;Q96K37;H7C1I0	A0A024R7G7;Q96K37;H7C1I0	Solute carrier family 35 member E1	SLC35E1			11	44.772	0.0853447	0.97119	0.0313644	0.240743	1.18894	0.522449	-0.40454	-2.52914	23.5599	23.7715	23.7905	23.9335	23.5634	23.7192	23.2686	23.5644	23.1694
A0A024R7I3;P61006;H0YMN7;H0YNE9;B4DMS1;Q92930;B3KTE3;Q59EP4;H0YLJ8;H0YL94;M0R257;B2R8W8;A8K6I8;A0A0A1HAV6;P20337;Q96E17	A0A024R7I3;P61006;H0YMN7;H0YNE9;B4DMS1;Q92930;B3KTE3;Q59EP4	Ras-related protein Rab-8A;Ras-related protein Rab-8B	RAB8A;RAB8B			28	23.668	0.213106	0.907986	-0.218566	-0.549018	0.74464	0.615529	0.723776	1.62241	24.3672	24.2654	24.4143	23.3659	24.6896	24.3357	25.1367	24.9727	24.4531
B4DHS5;A8K8L2;A0A024R7I5;Q9NXH9;B4E3A3;K7EQQ8;A0A024R7G3	B4DHS5;A8K8L2;A0A024R7I5;Q9NXH9;B4E3A3	tRNA (guanine(26)-N(2))-dimethyltransferase	TRMT1			5.3	58.38	0.022165	0.99629	0.00857226	0.0664026	0.980924	0.557499	-2.87208	-2.09288	26.4873	26.7724	26.6998	26.6402	26.5061	26.8389	22.7301	26.5057	22.1332
A8K5G0;A0A024R7K0;M0R2Z9;Q8IX01;M0R3F6;B4DSQ4;M0R1Y3;M0R065;M0R216	A8K5G0;A0A024R7K0;M0R2Z9;Q8IX01;M0R3F6;B4DSQ4	SURP and G-patch domain-containing protein 2	SFRS14;SUGP2			18.5	120.23	0.443793	0.807985	-0.106486	-1.03311	0.393599	0.795105	-0.070418	-0.932169	26.6043	26.8896	26.9094	26.6683	26.6608	26.7547	26.5486	26.5614	26.7626
A0A024R7K7;A0A024R7M6;Q86YP4;B4DKZ7;B4E0Q6;C9JVY3;V9GY85;H7C3H1;C9JMI3;C9JGN4;C9JHD7;C9JJK9;V9GYX5	A0A024R7K7;A0A024R7M6;Q86YP4;B4DKZ7	Transcriptional repressor p66-alpha	GATAD2A			22	68.062	0.263158	0.899609	0.0898813	0.659588	0.886869	0.583497	-0.360559	-1.90321	25.2595	25.3014	25.6786	25.4529	25.5514	25.5049	25.3879	25.2649	24.7747
E7ENJ6;B3KNH5;A0A024R7K8;Q9BXS5;B4DDG7;B4DN99;Q59EK3;K7EJL1;K7EPJ8;A0A087WZX7;K7ENA7;Q53GI5;B3KN68;Q9Y6Q5;K7ER75;K7EPR4;K7EJJ1;K7EK69;K7EQ90;K7ERH5;K7EL08;K7EQX3;K7EMG5	E7ENJ6;B3KNH5;A0A024R7K8;Q9BXS5;B4DDG7;B4DN99;Q59EK3;K7EJL1	AP-1 complex subunit mu-1	AP1M1			38.4	42.636	1.46326	0.480345	0.235671	3.15302	0.385453	0.79818	-0.0997346	-0.915628	26.7806	26.7995	26.6838	26.9752	26.885	27.1107	26.7295	26.9142	27.0279
A0A024R7L2;Q9NWV8;M0R3F4;M0R2A4;M0R2K3;M0R193;M0R0I0;J3KQS6;M0QXG9;M0R2I2;M0R3H9;M0QYV1	A0A024R7L2;Q9NWV8;M0R3F4;M0R2A4;M0R2K3;M0R193;M0R0I0;J3KQS6;M0QXG9;M0R2I2	BRISC and BRCA1-A complex member 1	HSPC142;BABAM1			21.3	36.56	1.18384	0.536861	0.388298	2.51812	0.838817	0.602003	-0.246159	-1.80768	23.2681	23.2165	23.5243	23.4827	23.862	23.8291	23.5629	23.358	23.5145
A0A024R7L5;A0A024R7L8;Q92900;B3KY55;A0A059XBJ1;A0A059XAJ5;A0A059XAL2;A0A059XG67;A0A059X4U2;Q6ZUC8;A0A059XG73;A0A059XBJ6;A0A059XAM1;A0A059XAL6	A0A024R7L5;A0A024R7L8;Q92900	Regulator of nonsense transcripts 1	UPF1			39.7	123.03	0.30287	0.881102	0.0354691	0.74459	0.480271	0.745827	-0.0563628	-1.10559	28.3485	28.364	28.3619	28.2993	28.4323	28.4492	28.3371	28.3699	28.3048
A0A024R7N2;Q9HD20;A0A024R7P3;Q8NC73;H7C3H2;Q6ZUA1;Q8TEG5;Q8N3E5	A0A024R7N2;Q9HD20;A0A024R7P3	Manganese-transporting ATPase 13A1	ATP13A1			30.8	132.95	0.719271	0.670959	0.0624491	1.57282	0.554741	0.698233	0.0650501	1.25201	28.0192	28.0856	28.0583	28.0578	28.1148	28.178	28.2016	28.1073	28.2368
B2R8G6;A0A024R7P2;Q14318;B7Z6M0;U3KQ64;A0A0A0MTJ1;M0R2K9;U3KQI1;M0R1Q0;M0R1S6;M0R2Q6	B2R8G6;A0A024R7P2;Q14318;B7Z6M0;U3KQ64;A0A0A0MTJ1	Peptidyl-prolyl cis-trans isomerase FKBP8	FKBP8			36.2	38.495	0.139016	0.939595	0.0387522	0.375899	0.831193	0.60089	0.155818	1.79259	26.2937	26.1238	26.3035	26.1402	26.2636	26.4334	26.4686	26.4298	26.4062
A0A024R7T3;P52597;B4DKS8;A0A1B0GW42	A0A024R7T3;P52597;B4DKS8	Heterogeneous nuclear ribonucleoprotein F;Heterogeneous nuclear ribonucleoprotein F, N-terminally processed	HNRPF;HNRNPF			50.8	45.671	0.20489	0.90973	0.0230796	0.530434	0.114901	0.932513	0.0203107	0.316379	28.2551	28.1828	28.2792	28.2993	28.1975	28.2896	28.2856	28.1849	28.3767
A0A024R7T4;P17026	A0A024R7T4;P17026	Zinc finger protein 22	ZNF22			15.6	25.915	0.206016	0.909439	-0.135022	-0.532988	0.252684	0.853337	-0.665451	-0.636795	24.8276	25.3505	25.2842	24.6955	25.3624	24.9993	22.3	25.3419	25.4189
A0A3B3IU45;B4DLA6;B3KMX0;A0A024R7U6;P33991;A0A3B3IT92;A0A3B3IS57;E5RG31;A0A3B3ITP6;A0A3B3IRR8;A4FS09;E5RFR3;Q6ZMK4;A0A0S2Z618;A0A0S2Z5Q9;A0A494C100;Q9UJA3	A0A3B3IU45;B4DLA6;B3KMX0;A0A024R7U6;P33991;A0A3B3IT92;A0A3B3IS57;E5RG31;A0A3B3ITP6	DNA replication licensing factor MCM4	MCM4			57.4	91.19	0.0965261	0.965482	-0.0192293	-0.269735	0.033063	0.981476	-0.00813293	-0.0979348	29.7839	29.6944	29.644	29.7319	29.5726	29.7601	29.5804	29.675	29.7848
A0A024R7X3;A0A024R7U9;Q9UI12;G3V126;B4E054;Q8TF11;B3KUZ7;E5RG49;E5RHH0;E5RK31;E5RJG1	A0A024R7X3;A0A024R7U9;Q9UI12;G3V126;B4E054;Q8TF11;B3KUZ7	V-type proton ATPase subunit H	ATP6V1H			23.2	54.151	0.393311	0.8372	0.0991732	0.931586	0.690419	0.645854	0.16595	1.51653	25.9289	25.9244	25.9448	25.8325	26.1954	26.0677	26.2101	26.2356	26.1478
A0A024R7V6;P61019;E9PKL7;A0A0A1HAW1;H7C125;O75546;H0YD31;A0A1D5RMT4;E9PE37;Q6PIK3	A0A024R7V6;P61019;E9PKL7;A0A0A1HAW1	Ras-related protein Rab-2A	RAB2;RAB2A			50.9	23.545	0.223907	0.908042	0.0714334	0.57325	1.29934	0.493092	0.270404	2.77264	26.0635	26.2081	26.3782	26.1846	26.457	26.2225	26.6499	26.4907	26.5347
A0A024R7V7;Q9P2D1;B4DIS0;Q6ZWF9	A0A024R7V7;Q9P2D1	Chromodomain-helicase-DNA-binding protein 7	CHD7			4	337.57	0.216293	0.908016	-0.0776723	-0.55619	0.314727	0.819808	-0.149775	-0.769578	24.2828	24.1857	24.2926	23.9762	24.1176	24.4343	23.7801	24.2641	24.0346
Q8NA80;A0A024R7W5;A0A087X0Q1;B4DPX9;A0A087WY31;Q7Z739;Q96MZ5;Q658Z6;Q8N3V9	Q8NA80;A0A024R7W5;A0A087X0Q1;B4DPX9;A0A087WY31;Q7Z739;Q96MZ5;Q658Z6;Q8N3V9	YTH domain-containing family protein 3	YTHDF3;DKFZp451J085;DKFZp451A052			28.3	58.309	0.362995	0.856911	-0.0646591	-0.869751	2.31609	0.407429	0.367918	5.65138	25.5971	25.7412	25.7223	25.505	25.6926	25.669	26.0416	25.9812	25.9476
A0A024R7W9;Q92905;Q59GH5;E5RHH5;E5RHF2;E5RFS1;E5RG35;E5RK55;H0UI27	A0A024R7W9;Q92905;Q59GH5;E5RHH5	COP9 signalosome complex subunit 5	COPS5			49.4	37.578	0.223841	0.90798	-0.088239	-0.573103	0.585557	0.688309	0.282818	1.31221	25.6939	25.1968	25.4164	25.3335	25.4488	25.26	25.2233	25.7558	25.9117
A0A024R7X0;Q9Y6D6;Q59FY5;E5RIF2;E5RHL7;E5RJN9;B3KMS9;B3KMT7;Q59FR3;B4DYN7	A0A024R7X0;Q9Y6D6;Q59FY5;E5RIF2	Brefeldin A-inhibited guanine nucleotide-exchange protein 1	ARFGEF1			5.4	208.76	1.02043	0.551773	-0.245319	-2.17379	0.141302	0.921586	0.053861	0.381447	24.7648	24.938	24.6779	24.591	24.3879	24.6657	24.5065	24.4702	24.8296
E9PH62;A0A024R7X7;Q9NUL3;A0A0A0MTC4;A0A0A0MTD1;Q2TBD5;F8VPI7;Q4LE57;E7EPX0;E7EVJ4;G5EA18;E5RJN7;A8K276;A0A0A0MTC6;E7EVI1;B7Z1P6;E5RJ67;H0YBY0;E5RGT3;E5RFK1	E9PH62;A0A024R7X7;Q9NUL3;A0A0A0MTC4;A0A0A0MTD1;Q2TBD5;F8VPI7;Q4LE57;E7EPX0;E7EVJ4;G5EA18;E5RJN7;A8K276;A0A0A0MTC6;E7EVI1;B7Z1P6	Double-stranded RNA-binding protein Staufen homolog 2	STAU2;STAU2 variant protein			30.9	58.97	0.801214	0.638686	-0.132327	-1.73343	0.104273	0.93723	-0.0350463	-0.289546	25.9856	25.888	26.0672	25.8479	25.7509	25.9451	25.9807	25.6133	25.8448
E5RHG8;A0A024R7Y5;Q15369;R4GMY8	E5RHG8;A0A024R7Y5;Q15369;R4GMY8	Transcription elongation factor B polypeptide 1	TCEB1			73	9.9601	0.0216808	0.996355	0.0134087	0.0649854	0.381754	0.799637	-0.163204	-0.908099	26.107	26.5904	26.2963	26.3542	26.0785	26.6013	26.2978	26.2587	25.9878
B4DHN5;E9PBU7;B4DQ93;A0A024R7Z5;O00560;G5EA09	B4DHN5;E9PBU7;B4DQ93;A0A024R7Z5;O00560;G5EA09	Syntenin-1	SDCBP			24.3	25.968	0.568794	0.751761	0.911572	1.27949	0.364319	0.806199	0.101753	0.872468	23.2747	22.7499	20.9499	23.0173	23.3361	23.3558	23.3435	23.267	23.4039
B4DV79;A4D210;A0A024R821;P55884;B4DXN6;Q96G38;Q86UM1;Q59FS8;C9JZG1;C9JQN7	B4DV79;A4D210;A0A024R821;P55884;B4DXN6;Q96G38	Eukaryotic translation initiation factor 3 subunit B	EIF3B;EIF3S9			39.7	85.134	0.561475	0.755405	0.103779	1.26518	0.744661	0.616309	0.0565211	1.62245	28.9001	28.6317	28.7058	28.8668	28.8136	28.8686	28.9211	28.8487	28.9487
A0A024R830;A0A140VJL8;P29218;E5RG13;E5RIP7;H0YBL1;E5RG94;E5RIF4;E5RHE9;E5RI82;E5RGY4	A0A024R830;A0A140VJL8;P29218;E5RG13;E5RIP7;H0YBL1	Inositol monophosphatase 1	IMPA1			26	30.188	1.82875	0.407362	0.352403	4.10159	2.54582	0.341556	0.599356	6.52713	25.1904	24.9301	25.0516	25.3274	25.4411	25.4608	26.1106	25.8471	26.0697
A0A024R843;Q13049;Q5JVY0	A0A024R843;Q13049;Q5JVY0	E3 ubiquitin-protein ligase TRIM32	TRIM32			4	71.988	0.845799	0.629607	0.208197	1.82151	0.0313195	0.98351	0.00999641	0.092936	22.1168	22.1578	22.4573	22.5104	22.3771	22.4689	22.2827	22.475	22.6287
A0A024R845;P61106;X6RFL8	A0A024R845;P61106;X6RFL8	Ras-related protein Rab-14	RAB14			31.6	23.897	0.0737335	0.97281	-0.0374699	-0.210107	0.0738266	0.956239	0.0363636	0.210355	24.0904	24.3754	24.1142	23.9131	24.1154	24.4391	24.0346	24.2959	24.2461
A0A024R857;Q96ME1;H0Y6I6;B4DH63;B3KTC9	A0A024R857;Q96ME1;H0Y6I6;B4DH63;B3KTC9	F-box/LRR-repeat protein 18	FBXL18			26.7	78.919	0.375923	0.845246	-0.0870705	-0.896209	0.0196074	0.988918	0.00578562	0.0589008	26.3629	26.5252	26.2974	26.4474	26.2399	26.237	26.1985	26.4379	26.3053
A0A024R861;O00743;B7Z3E2;A0A0S2Z482;Q5T1S7	A0A024R861;O00743;B7Z3E2	Serine/threonine-protein phosphatase;Serine/threonine-protein phosphatase 6 catalytic subunit;Serine/threonine-protein phosphatase 6 catalytic subunit, N-terminally processed	PPP6C			28.5	35.144	0.529032	0.772218	0.0523745	1.20165	0.210563	0.872304	0.0418733	0.54328	25.8295	25.9484	25.8115	25.9009	25.9196	25.926	25.8082	26.001	26.0629
F8W9S7;A0A024R875;A0A024R862;A0A024R8A2;Q14C86;C9IZ08;B4DK42;B0QZ65;B4DGD8;H0Y4E7;H0Y7I9;A0A0A0MQV8;B3KN67;B3KTX2;C9IZX9;B3KMM3	F8W9S7;A0A024R875;A0A024R862;A0A024R8A2;Q14C86;C9IZ08;B4DK42;B0QZ65;B4DGD8	GTPase-activating protein and VPS9 domain-containing protein 1	GAPVD1			12.5	157.46	0.266518	0.89937	0.0728385	0.666865	0.350748	0.80867	0.0876077	0.84455	26.4578	26.3764	26.2372	26.2713	26.4425	26.5761	26.6263	26.4552	26.4712
A0A024R872;Q96TA1;Q9H8K1;Q2YD88;Q9H6L6	A0A024R872;Q96TA1;Q9H8K1	Niban-like protein 1	C9orf88;FAM129B			16.9	82.682	0.564389	0.753014	-0.0553735	-1.27088	0.472312	0.748907	0.069362	1.08983	26.1775	26.1776	26.1762	26.1789	26.0362	26.1502	26.283	26.1341	26.1562
A0A024R883;O75348;F2Z307;O95670	A0A024R883;O75348;F2Z307;O95670	V-type proton ATPase subunit G 1;V-type proton ATPase subunit G 2	ATP6V1G1;ATP6V1G2-DDX39B;ATP6V1G2			22	13.757	1.12434	0.524876	0.423579	2.39079	1.20767	0.520013	0.303526	2.56981	23.7897	23.5273	24.009	23.9887	24.2506	24.3575	24.4416	24.5882	24.4775
H0Y5D5;A0A494C0L7;Q9BTG3;B4E0A3;Q5SYW2;A0A024R885;B7Z3U7;F5H2X7;Q9ULV3;B0EXJ7;Q96KB7	H0Y5D5;A0A494C0L7;Q9BTG3;B4E0A3;Q5SYW2;A0A024R885;B7Z3U7;F5H2X7;Q9ULV3;B0EXJ7	Cip1-interacting zinc finger protein	CIZ1			6.5	91.124	1.16228	0.530861	0.61075	2.47171	0.49537	0.739258	-0.470135	-1.13542	23.2733	23.1018	22.4672	23.5198	23.6191	23.5356	23.5107	22.2623	23.4911
B7ZC39;A0A024R896;B7ZC38;Q9NR46;F8WFB9;Q71RA6	B7ZC39;A0A024R896;B7ZC38;Q9NR46;F8WFB9	Endophilin-B2	SH3GLB2			12.8	41.668	0.355353	0.85561	0.195625	0.854041	0.306083	0.824264	-0.864449	-0.751379	24.6271	24.2244	24.1814	24.1811	24.6993	24.7394	21.423	24.5394	25.0639
A0A024R8A7;Q96I24;A0A494C1K6	A0A024R8A7;Q96I24	Far upstream element-binding protein 3	hCG_31253;FUBP3			50.3	61.64	0.346225	0.859489	0.0440712	0.835209	1.57726	0.469927	-0.160121	-3.43273	28.3326	28.2902	28.2175	28.3537	28.2437	28.3751	28.1354	28.2091	28.1477
B3KNH1;A0A024R8D2;Q6P1M0;Q9BTA1;B3KQE8	B3KNH1;A0A024R8D2;Q6P1M0;Q9BTA1;B3KQE8	Long-chain fatty acid transport protein 4	SLC27A4			14.1	57.194	0.872632	0.622667	-0.188352	-1.87482	0.620567	0.684715	0.268663	1.38046	23.6861	23.7218	23.7755	23.7059	23.5427	23.3697	23.5008	24.0824	23.8412
A0A024R8D4;Q9Y399;Q5T8A0	A0A024R8D4;Q9Y399;Q5T8A0	28S ribosomal protein S2, mitochondrial	MRPS2			10.3	35.552	0.294535	0.884331	-0.0440642	-0.726923	0.272185	0.844089	-0.0943311	-0.679102	25.4075	25.4765	25.6082	25.4299	25.4503	25.4797	25.0901	25.4386	25.5484
A0A024R8H6;Q15059;B4DS09;A0A140F1N4;A9J571	A0A024R8H6;Q15059;B4DS09;A0A140F1N4	Bromodomain-containing protein 3	BRD3			14	79.541	0.0270473	0.995	0.00730133	0.0806142	0.124103	0.924297	0.0334206	0.339307	23.7732	23.719	23.7102	23.754	23.8879	23.5824	23.8614	23.7245	23.7387
A0A2P0H7U5;A0A024R8K8;J3QS41;B7ZLW2;P42694;A0A075B6R3;J3QRR8;Q6PGP6	A0A2P0H7U5;A0A024R8K8;J3QS41;B7ZLW2;P42694	Probable helicase with zinc finger domain	HELZ			8.1	219.03	0.0116461	0.997379	0.00584857	0.0352887	0.0545519	0.968246	-0.020757	-0.158209	25.2289	25.2886	24.8458	25.117	25.2888	24.975	25.0098	25.013	25.2958
J3QQS1;A0A024R8L0;J3QLS3;Q9Y2R9;J3KSI8;J3QKW2	J3QQS1;A0A024R8L0;J3QLS3;Q9Y2R9;J3KSI8;J3QKW2	28S ribosomal protein S7, mitochondrial	MRPS7			27.9	19.903	0.0876311	0.970359	-0.0360546	-0.246711	0.392408	0.794543	0.119772	0.929755	25.1897	25.0552	24.8958	24.7773	25.0887	25.1665	25.1529	25.0359	25.203
K7EIJ0;K7ENL2;A6NG10;K7EMC9;Q7Z511;A0A024R8L1;Q969T9;K7EIN1;K7ESN4;B4DFL8;B4DV07;K7EIK1	K7EIJ0;K7ENL2;A6NG10;K7EMC9;Q7Z511;A0A024R8L1;Q969T9;K7EIN1;K7ESN4;B4DFL8;B4DV07	WW domain-binding protein 2	WBP2			20.4	18.224	0.775856	0.646242	0.25755	1.68358	0.249722	0.851977	0.118505	0.63032	23.9622	23.7837	23.544	23.9195	24.2075	23.9355	24.4592	23.9235	24.0353
A0A024R8T3;A0A024R8L7;Q15067;B4DU07;K7ELT1;I3L0T4;I3L2U4;I3L4S5;K7ENF1;K7ESC7	A0A024R8T3;A0A024R8L7;Q15067;B4DU07	Acyl-coenzyme A oxidase;Peroxisomal acyl-coenzyme A oxidase 1	ACOX1			40.2	74.441	0.191017	0.918642	0.0369676	0.498737	1.71437	0.416643	0.178553	3.78793	27.7271	27.9335	27.9018	27.943	27.911	27.8193	28.0163	28.1166	28.0761
A0A024R8M0;Q14344;B4DWV9;B4DEJ3;E9PC54;Q8N652;Q8IY73;P19086;Q03113	A0A024R8M0;Q14344;B4DWV9	Guanine nucleotide-binding protein subunit alpha-13	GNA13			17.5	44.049	0.427859	0.809673	0.176785	1.00123	0.0848261	0.949435	-0.0400925	-0.239386	24.1326	24.2886	24.3155	24.0886	24.5738	24.6046	24.36	24.3958	24.391
A0A024R8M4;Q14558;C9J168;B4DP31;C9JKT9;C9JNQ3;C9JUN4	A0A024R8M4;Q14558;C9J168;B4DP31	Phosphoribosyl pyrophosphate synthase-associated protein 1	PRPSAP1			27.5	39.393	0.428772	0.811656	-0.0764039	-1.00306	0.632097	0.673519	0.137292	1.40292	24.7652	24.6715	24.5724	24.6877	24.5837	24.5084	24.5914	24.8783	24.722
A0A024R8P8;P63173;J3KT73;J3QL01;J3KSP2	A0A024R8P8;P63173;J3KT73;J3QL01	60S ribosomal protein L38	RPL38			38.6	8.2178	0.56032	0.751762	0.249622	1.26292	0.516161	0.720568	0.0992324	1.17637	26.2255	25.6134	25.7485	25.9932	26.2281	26.115	26.2445	26.2768	26.1128
A0A024R8Q1;P10253;I3L0S5;I3L3L3	A0A024R8Q1;P10253	Lysosomal alpha-glucosidase;76 kDa lysosomal alpha-glucosidase;70 kDa lysosomal alpha-glucosidase	GAA			16.7	105.34	0.212607	0.908414	0.0863482	0.547892	0.319434	0.820829	-0.0923004	-0.779454	25.7086	25.9145	26.1079	26.0514	25.7893	26.1493	25.9156	25.9844	25.8132
A0A024R8R4;Q8TAT6;B4DG89;I3L4U9;I3L283;A0A0D9SFI9;I3L3I1	A0A024R8R4;Q8TAT6;B4DG89	Nuclear protein localization protein 4 homolog	NPLOC4			22	68.119	2.07957	0.350794	0.438665	4.85225	0.19532	0.884585	-0.0964127	-0.508611	25.5797	25.4045	25.6213	25.9097	26.0965	25.9153	26.0953	26.0152	25.5217
A0A024R8S3;P61956;Q6EEV6	A0A024R8S3;P61956	Small ubiquitin-related modifier;Small ubiquitin-related modifier 2	SUMO2			27.4	10.871	0.891939	0.618854	-0.110108	-1.91334	0.10536	0.936649	0.0327066	0.292308	28.7518	28.8486	28.7113	28.6958	28.7062	28.5794	28.7735	28.4864	28.8196
A0A024R8S5;P07237;B4DNL5;B4DUA5;H7BZ94;B4DLN6;H0Y3Z3;I3L398;Q96C96;I3L312;B3KTQ9;B4DJS0;I3L4M2;I3L0S0;I3NI03;I3L3P5;I3L3U6;B4DNP9;I3L1Y5;I3L514	A0A024R8S5;P07237;B4DNL5;B4DUA5;H7BZ94;B4DLN6;H0Y3Z3	Protein disulfide-isomerase	P4HB			56.5	57.116	0.0321199	0.992884	-0.00746536	-0.0952328	2.35507	0.40672	-0.222019	-5.79264	30.0643	29.803	29.9607	29.9344	29.9023	29.969	29.767	29.6528	29.7197
A0A024R8U8;Q8WVQ1;K7EN15	A0A024R8U8;Q8WVQ1	Soluble calcium-activated nucleotidase 1	CANT1			14.5	44.839	1.05766	0.542108	0.536364	2.25081	0.444039	0.763053	0.168207	1.0336	22.8975	23.4512	22.6531	23.4918	23.5995	23.5197	23.4444	23.6764	23.9947
E7D7Y0;E7D7X9;A0A1B2JLU7;A0A024R8U9;P32322;E2QRB3;Q8TBX0;Q2TU78;J3QL24;B7Z8T1;J3QKT4;J3KQ22;J3QR88;J3QLK9;J3QL32;J3KSA9;J3QL23;J3KTA8;J3QKT3;J3QRZ0	E7D7Y0;E7D7X9;A0A1B2JLU7;A0A024R8U9;P32322;E2QRB3;Q8TBX0;Q2TU78	Pyrroline-5-carboxylate reductase;Pyrroline-5-carboxylate reductase 1, mitochondrial	PYCR1;PIG45			30.4	33.432	0.355098	0.855395	0.1046	0.853516	0.0201167	0.988787	-0.00636355	-0.0603978	26.0765	25.9424	26.3353	26.1503	26.2941	26.2235	26.3947	26.0618	26.1924
A0A024R8V0;A0A024R8Q0;Q1WWK5;K7EL40;K7ENL0;B4DTL7;K7EK18;K7EJV0;K7EJ51;K7ER52;K7EPY1;K7EIE4;K7ER14;K7EQD7;K7ELJ9;K7EJL9;K7EIR4;K7EKN4;K7EN52;K7ENQ5;K7EJZ2;K7ERG1;A2VCQ5;K7EQ08;K7ER34	A0A024R8V0;A0A024R8Q0		2009-09-01			59.9	63.633	0.138537	0.939553	0.0325216	0.374732	0.426502	0.774405	-0.0741329	1899-12-29 00:02:08	30.8952	30.6625	30.8801	30.7645	30.8577	30.9132	30.8254	30.6507	30.8369
A0A024R8W0;P38919;I3L3H2;Q59GT8;Q5JWW0;E9PBH4;F8WE11;C9JUF0	A0A024R8W0;P38919;I3L3H2	Eukaryotic initiation factor 4A-III;Eukaryotic initiation factor 4A-III, N-terminally processed	DDX48;EIF4A3			57.4	46.871	0.263752	0.900238	-0.0512791	-0.660877	0.123066	0.925469	-0.0314674	-0.336737	29.7798	29.8703	29.8172	29.8845	29.6347	29.7942	29.7599	29.6301	29.8291
B4E0G1;A0A024R8X3;H7BYT1;P48730;B4DIJ9;Q59FJ7;H0Y645;B0QY35;B0QY34;Q5U045;Q53EZ1;B3KRV2;P49674;J3KRM8;H0Y2N6;J3QQI9;B0QY36	B4E0G1;A0A024R8X3;H7BYT1;P48730;B4DIJ9;Q59FJ7;H0Y645;B0QY35;B0QY34;Q5U045;Q53EZ1;B3KRV2;P49674	Casein kinase I isoform delta;Casein kinase I isoform epsilon	CSNK1D;CSNK1E			18.2	40.929	0.0174524	0.998899	-0.0155595	-0.0525487	0.749691	0.615974	-0.429018	-1.63229	24.637	25.1518	24.9097	25.3959	24.6382	24.6178	24.4617	24.5541	24.3489
Q53GB9;A0A024R8Z1;Q5VV89;O14880;Q5VV87	Q53GB9;A0A024R8Z1;Q5VV89;O14880;Q5VV87	Microsomal glutathione S-transferase 3	MGST3			33.6	16.53	0.505789	0.785613	-0.672066	-1.15596	0.442811	0.76501	-1.04745	-1.03115	24.1015	24.1975	24.5866	24.0537	22.5084	24.3074	22.649	24.0032	21.075
Q5R3B4;B2R4Q7;A0A024R8Z5;O95563	Q5R3B4;B2R4Q7;A0A024R8Z5;O95563	Mitochondrial pyruvate carrier 2	MPC2;BRP44			37.1	11.681	0.372178	0.844547	-0.156887	-0.888559	0.616143	0.684096	0.208017	1.37184	23.244	23.121	23.525	23.2173	23.3158	22.8863	23.2388	23.3051	23.4995
A8K4A8;A0A024R8Z9;Q6PI48;A0A3B3ISK7;A0A3B3ITS3;A0A3B3IS01;A0A3B3IT01;A0A3B3IS54;Q9H9J7;Q9NVT8;A0A3B3ITK9;A0A3B3IT89;Q9H9M6	A8K4A8;A0A024R8Z9;Q6PI48;A0A3B3ISK7;A0A3B3ITS3;A0A3B3IS01;A0A3B3IT01;A0A3B3IS54;Q9H9J7;Q9NVT8	Aspartate--tRNA ligase, mitochondrial	DARS2			33.2	73.574	0.0648422	0.975316	-0.0338427	-0.186259	0.654269	0.659196	-0.291131	-1.4461	27.5772	27.7969	27.8542	27.9917	27.4346	27.7004	27.6459	27.3738	27.2336
Q6NVY0;A0A024R904;Q9HB71;B4DFD3;B2ZWH1	Q6NVY0;A0A024R904;Q9HB71	Calcyclin-binding protein	CACYBP			55.3	26.182	0.0207106	0.996886	0.00442823	0.0621416	0.0502426	0.967948	0.0141945	0.146311	28.2754	28.0599	28.1996	28.1236	28.1865	28.2381	28.074	28.1417	28.3751
A0A024R911;Q9UBH6	A0A024R911;Q9UBH6	Xenotropic and polytropic retrovirus receptor 1	XPR1			20.5	81.534	0.346196	0.858409	-0.0720654	-0.835149	0.114752	0.931983	-0.0309334	-0.316007	27.9489	28.0673	27.9601	28.0618	27.9039	27.7945	27.7698	27.9467	27.9508
H0YKH1;F8WA05;H0YLF5;Q53YC7;A0A024R919;P40424;A0A2Z5DI25;A0A087X0P4;A0A0A0MTI0;A8K5V0;H0YLM3;H0YLD4;H0YLT4;B7Z774;H0YLB0;Q7Z5L6	H0YKH1;F8WA05;H0YLF5;Q53YC7;A0A024R919;P40424;A0A2Z5DI25;A0A087X0P4;A0A0A0MTI0;A8K5V0	Pre-B-cell leukemia transcription factor 1	PBX1			43.4	17.635	0.343953	0.85864	-0.278861	-0.830507	0.438421	0.766213	-0.314168	-1.02238	23.7869	24.3115	24.444	24.1632	23.3636	24.179	23.8303	23.614	23.3191
A0A024R957;Q8NFQ8	A0A024R957;Q8NFQ8	Torsin-1A-interacting protein 2	TOR1AIP2			15.1	51.263	0.0399161	0.990004	-0.0161444	-0.11742	0.214917	0.870573	-0.0871334	-0.553097	24.7305	24.4561	24.6359	24.385	24.6216	24.7676	24.3475	24.7195	24.4457
A0A024R972;P11047;Q6NVY8	A0A024R972;P11047	Laminin subunit gamma-1	LAMC1			5.8	174.01	0.350214	0.859522	-0.157887	-0.843448	0.830141	0.599144	-0.450283	-1.79051	24.2834	24.3333	24.1736	24.4066	23.7805	24.1296	23.8364	23.8229	23.3065
A0A024R983;P10155;B3KN94;G5E9R9;D6RE09;H0Y9N5;D6RDN1	A0A024R983;P10155;B3KN94	60 kDa SS-A/Ro ribonucleoprotein	TROVE2			27.1	60.67	0.493627	0.784403	0.12613	1.13198	0.204579	0.87768	0.0559572	0.529726	26.7925	26.679	26.641	26.7191	27.0334	26.7384	26.9267	26.8311	26.9009
A0A024R994;O75131;Q05DL8;A0A087WYQ3;H0YB26;E5RHZ0;A0A087WXR6;A0A087WUS8;E5RFT7;Q4G168;B3KWK1;B2RD40;A8K8A4;E7ENV7;B7Z370;Q96FN4;Q8IYJ1;Q96A23;O95741;Q86YQ8;Q9HCH3;Q9UBL6	A0A024R994;O75131;Q05DL8	Copine-3	CPNE3			29.4	60.13	1.1971	0.540579	0.213956	2.54684	0.130943	0.920803	-0.0280005	-0.356173	26.8397	27.0422	26.7704	27.0611	27.1024	27.1307	27.1096	26.9232	27.1773
A0A024R9A9;Q9NPD8	A0A024R9A9;Q9NPD8	Ubiquitin-conjugating enzyme E2 T	UBE2T			15.7	22.521	0.0435873	0.988731	0.0212542	0.127754	0.69333	0.64354	-0.260893	-1.52221	24.4017	24.4904	24.5213	24.169	24.6271	24.6812	24.1225	24.2804	24.2916
A0A024R9B5;B4DMM7;Q15291;B4DLF8	A0A024R9B5;B4DMM7;Q15291;B4DLF8	Retinoblastoma-binding protein 5	RBBP5			9.9	59.152	0.425072	0.811505	0.774066	0.995643	1.01501	0.545276	-1.60076	-2.16265	21.8974	24.2726	24.1755	24.309	24.2107	24.1481	21.7986	24.0959	21.971
A0A024R9C1;P11940;E7EQV3;E7ERJ7;B4DQX0;A0A087WTT1;B4DZW4;B3KT93;A0A024R9E2;H0YAR2;Q5VX58;Q3ZCS4;Q9H361;Q2VIP3;H0YBN4;E5RJB9;E5RGH3;E5RH24;H0YAP2;H0YAS6;H0YB75;H0YB86;Q4VXU2;H0YAS7;E5RHG7;H0YC10;E5RGC4;E5RFD8;L0R533;E5RJM8;H0YAW6;A8K8J2;B4DM75;Q96DU9	A0A024R9C1;P11940;E7EQV3;E7ERJ7;B4DQX0;A0A087WTT1;B4DZW4;B3KT93;A0A024R9E2;H0YAR2;Q5VX58;Q3ZCS4;Q9H361	Polyadenylate-binding protein;Polyadenylate-binding protein 1;Polyadenylate-binding protein 3	PABPC1;PABPC3			62.1	70.67	0.760709	0.654816	-0.0811202	-1.65387	0.992431	0.554816	0.11551	2.11636	31.6635	31.5295	31.5807	31.4951	31.4679	31.5674	31.6016	31.5611	31.7142
E5RI99;A0A024R9D3;P62888;A0A0B4J213;E5RJH3;A0A0C4DH44	E5RI99;A0A024R9D3;P62888	60S ribosomal protein L30	RPL30			58.8	12.656	0.101319	0.959531	-0.0326589	-0.282019	0.593696	0.68343	-0.104549	-1.32809	28.2017	28.4225	28.5638	28.2673	28.4146	28.4082	28.2665	28.3628	28.1472
A0A024R9D7;Q16698;E5RID6;E5RJG7;Q7LDK6;E5RFV2;H0YAW3;E5RJD2	A0A024R9D7;Q16698;E5RID6;E5RJG7;Q7LDK6;E5RFV2	2,4-dienoyl-CoA reductase, mitochondrial	DECR1;DECR			12.5	36.067	0.894124	0.618851	0.163242	1.91771	0.445519	0.763278	-0.124422	-1.03655	24.5603	24.4198	24.5083	24.5567	24.8044	24.6171	24.7056	24.5182	24.3811
A0A024R9G4;Q9NUQ9;Q68D08;A0A1W2PRQ0;A0A087X178;Q3ZTR9;E5RJE1;E5RIR8;E5RJL8;E5RI16;E5RK81;E5RH75;E5RK61;E5RFS4;E5RHU5;E5RGI7;B3KRB1;Q9H0Q0	A0A024R9G4;Q9NUQ9;Q68D08;A0A1W2PRQ0;A0A087X178;Q3ZTR9	Protein FAM49B	FAM49B;DKFZp686B04128;BM009			31.5	36.748	0.849988	0.628781	0.119498	1.82982	1.90094	0.370338	0.269164	4.30838	25.3075	25.1548	25.1736	25.2566	25.3281	25.4097	25.5293	25.5912	25.6814
Q5HYC7;H0YMQ9;H0YKQ8;Q3ZCQ6;B3KXX3;I3L4N6;B4DF30;Q6NSI7;A0A024R9K8;A8K935;A0A024R9I5;Q9UP95;Q9UHW9;J3QSF2	Q5HYC7;H0YMQ9;H0YKQ8;Q3ZCQ6;B3KXX3;I3L4N6;B4DF30;Q6NSI7;A0A024R9K8;A8K935;A0A024R9I5;Q9UP95;Q9UHW9;J3QSF2	Solute carrier family 12 member 4;Solute carrier family 12 member 6	DKFZp686O1827;SLC12A6;SLC12A4			1.9	99.26	0.112465	0.950917	-0.150678	-0.310264	0.290712	0.836383	-0.348169	-0.718789	22.3769	22.7454	22.8036	22.963	21.5575	22.9534	22.2948	21.8867	22.2479
A0A024R9J0;O60216;E5RFZ5;B3KUT8;E5RG18;E5RI01;F6KSS9;Q9H4I0;A0A140T8W2;E5RJW1;E5RJK5;E5RFV8;E5RIN7	A0A024R9J0;O60216	Double-strand-break repair protein rad21 homolog	RAD21			26.5	71.689	0.0576918	0.97808	-0.0119044	-0.16682	0.379816	0.7999	0.119115	0.904151	26.4984	26.3975	26.3004	26.3866	26.461	26.313	26.6373	26.2568	26.6238
A0A024R9L1;O60306;B0AZM4;A8K6F0;H0YH15;H0YLN9	A0A024R9L1;O60306;B0AZM4;A8K6F0	Intron-binding protein aquarius	AQR			17.6	171.29	0.0387634	0.989585	0.00912666	0.11416	0.0185634	0.988397	-0.00273323	-0.0558271	27.0392	27.1909	26.9459	27.134	27.0103	27.0591	26.9992	27.0907	27.1053
A0A024R9L9;Q96JC1	A0A024R9L9;Q96JC1	Vam6/Vps39-like protein	VPS39			9.8	100.77	0.254787	0.902805	-0.139324	-0.641386	0.0341861	0.979222	-0.0452957	-0.101146	22.8387	22.7772	22.8764	23.0923	22.3549	22.6272	21.9095	22.7787	23.2503
A8K9B9;A0A024R9N6;Q9H223	A8K9B9;A0A024R9N6;Q9H223	EH domain-containing protein 4	EHD4			14.6	61.155	1.30778	0.509651	0.878802	2.79166	0.688421	0.646664	-1.26863	-1.51264	23.1602	23.2009	22.2422	23.6951	23.8094	23.7353	23.9894	21.0949	22.3496
B7Z8D8;D6R927;A0A024R9Q8;Q06330;Q14663	B7Z8D8;D6R927;A0A024R9Q8;Q06330;Q14663	Recombining binding protein suppressor of hairless	RBPJ;RBPSUH;KBF2			6.1	42.667	NaN	1	0	NaN	1.94484	0.365143	1.36004	4.43768	22.9776	22.2087	22.0993	22.1637	21.4052	22.4237	23.3561	23.3995	23.3171
A0A024R9R3;Q9P253;H0YMC9;H0YLM6	A0A024R9R3;Q9P253	Vacuolar protein sorting-associated protein 18 homolog	VPS18			10	110.18	0.503115	0.783986	0.335458	1.15069	0.222621	0.866138	-0.241535	-0.570376	26.0535	26.3002	26.7205	26.6951	26.3169	27.0686	27.1766	26.1437	26.0357
A8K2V6;A0A024R9R7;Q9ULG1;Q6N074;A0A087X0U7;Q9NUK2;H0YMN5	A8K2V6;A0A024R9R7;Q9ULG1;Q6N074;A0A087X0U7;Q9NUK2;H0YMN5	DNA helicase INO80	INOC1;INO80;DKFZp686N224			2	151.86	0.342257	0.860199	0.350677	0.826997	0.488099	0.741574	-0.544336	-1.12107	21.9354	22.5961	22.446	22.0055	23.298	22.726	21.8983	21.7523	22.7459
B4DJJ3;A0A024R9S6;Q6NXT6;B4DR99;H0Y985	B4DJJ3;A0A024R9S6;Q6NXT6;B4DR99;H0Y985	Transmembrane anterior posterior transformation protein 1 homolog	FLJ90013;TAPT1			4.8	52.104	0.31721	0.874479	-0.081171	-0.77479	0.550636	0.701071	-0.283332	-1.24398	23.0037	23.2568	22.9951	22.9984	22.9029	23.1108	22.9882	22.8888	22.2851
A0A024R9U3;Q9NX40;D6RG39;D6RIT9;D6RDK6;D6RBN5;D6R918;D6RBC5;D6RDI5;D6RI08;D6RA54;D6RC55;D6RDK1;B4DND1;D6RIV2;D6R9T5;D6RF07	A0A024R9U3;Q9NX40;D6RG39;D6RIT9;D6RDK6;D6RBN5;D6R918;D6RBC5;D6RDI5;D6RI08;D6RA54;D6RC55;D6RDK1;B4DND1;D6RIV2;D6R9T5	OCIA domain-containing protein 1	OCIAD1			34.3	27.626	1.43749	0.491231	0.544074	3.09158	0.32062	0.821889	-0.143148	-0.781938	24.9764	24.952	24.7599	25.1424	25.7002	25.4779	25.1759	25.461	25.2542
A0A024R9Y3;A0A024R9U8;A0A024R9W5;Q7Z6Z7;Q5H924;Q5H962;B4DGF6;Q5H935;H0Y659;Q5H964;A0A087X1S3;Q3B7K0;Q53FW4;A0A1B0GXC7;Q5H963;Q8IWJ0	A0A024R9Y3;A0A024R9U8;A0A024R9W5;Q7Z6Z7;Q5H924	E3 ubiquitin-protein ligase HUWE1	HUWE1			10.5	480.15	0.265576	0.899913	-0.0451984	-0.664828	0.238628	0.85557	-0.0433966	-0.605933	27.6271	27.6738	27.6246	27.6924	27.4699	27.6276	27.5295	27.5219	27.6083
A0A024R9W7;P57088;D6RAA6;A6QKW0;H0Y8N0;J3KN43;D6RBY2	A0A024R9W7;P57088;D6RAA6;A6QKW0	Transmembrane protein 33	TMEM33;SHINC3			36	27.978	0.0741593	0.973936	-0.0842412	-0.21124	1.28554	0.490734	-1.03257	-2.74169	28.4308	29.3524	28.9175	29.3003	28.2761	28.8715	27.9845	28.0444	27.3214
B2R745;A0A024R9W8;A0A0S2Z514;Q6PML9;A0A0S2Z512;B4DSU2;D6R9M6	B2R745;A0A024R9W8;A0A0S2Z514;Q6PML9;A0A0S2Z512	Zinc transporter 9	SLC30A9			14.8	63.482	0.127566	0.945427	0.0332527	0.347863	0.463173	0.757664	0.103577	1.0717	24.2856	24.1073	24.3801	24.2065	24.3867	24.2794	24.2321	24.4818	24.4695
Q05DU1;A0A024R9Y6;Q9NVN8	Q05DU1;A0A024R9Y6;Q9NVN8	Guanine nucleotide-binding protein-like 3-like protein	GNL3L			9	65.352	0.159495	0.933322	0.235255	0.425098	0.157876	0.907098	-0.205359	-0.42125	22.9345	22.0901	22.8432	22.5025	22.255	23.8161	22.6084	22.5881	22.761
A0A024R9Y7;Q9UNF1;B4DX55;Q5H909;Q5H907;B4DNG7;B4DWM5;Q9BX88;Q9BX89;A0A087X070;Q9NVY3;Q9BX91;G5E9N2;Q9BX90;A0A024R9X0;B4DS47;B4DK08;Q12816	A0A024R9Y7;Q9UNF1;B4DX55;Q5H909;Q5H907	Melanoma-associated antigen D2	MAGED2			36.5	64.953	0.0511914	0.982885	-0.0171604	-0.148938	0.721088	0.622381	0.190367	1.57637	27.3694	27.3144	27.4902	27.1687	27.4856	27.4682	27.6209	27.4383	27.6346
A0A024R9Z0;O00483	A0A024R9Z0;O00483	Cytochrome c oxidase subunit NDUFA4	NDUFA4			46.9	9.3697	0.124288	0.94684	-0.114999	-0.339766	1.02517	0.546097	-0.467188	-2.18355	25.8476	26.5952	26.8416	26.6186	26.2362	26.0845	25.9915	25.9869	25.5594
B4DGE7;A0A024RA24;Q9NXC5;C9JTV2;C9JAQ1;C9JUE6	B4DGE7;A0A024RA24;Q9NXC5	WD repeat-containing protein mio	FLJ20323;MIOS			13.1	98.636	0.122102	0.949426	0.0356808	0.334345	0.266812	0.847426	0.0803191	0.667502	24.2745	24.5421	24.5932	24.5531	24.4255	24.5382	24.3725	24.7591	24.6262
A0A024RA25;Q9NZW5;B8ZZG1;C9J4Q3;C9JGI8;F8WCD2;R4GNA8;Q6PG47;B4DS08;REV__Q8N884;B4DZ84;D3DX48;B4DRL7;A0A0A0MRU0;A0A0D9SFF8;D3DX49;A0A0C4DH75;Q14168	A0A024RA25;Q9NZW5;B8ZZG1;C9J4Q3	MAGUK p55 subfamily member 6	MPP6			14.1	61.116	0.390394	0.839579	0.0668163	0.925668	0.0932428	0.944645	-0.0273908	-0.261272	24.6423	24.7188	24.7761	24.901	24.7177	24.7189	24.7838	24.5906	24.881
B3KW79;A0A024RA40;Q9H3G5;H7C218;H7C0X5;O75225;C9JVI2;C9JZ94;Q75MM4	B3KW79;A0A024RA40;Q9H3G5;H7C218;H7C0X5;O75225	Probable serine carboxypeptidase CPVL	CPVL			6.3	54.172	0.230964	0.906945	-0.439091	-0.588967	0.227215	0.863654	0.380606	0.580629	23.4962	22.4251	23.5785	21.4415	23.2562	23.4848	23.1866	23.2451	22.8926
E7ETZ4;A0A024RA42;Q9Y6E2;B7Z4K8;B3KM68;B5MCE7;B5MCH7;E9PFD4;Q75MG1;E9PFE3;B7Z6N5;C9JF98;F8WDX8;E7EMS9	E7ETZ4;A0A024RA42;Q9Y6E2;B7Z4K8;B3KM68;B5MCE7;B5MCH7;E9PFD4;Q75MG1	Basic leucine zipper and W2 domain-containing protein 2	BZW2			24.8	46.913	0.203402	0.912341	0.0939999	0.527053	0.559073	0.694818	-0.180232	-1.26049	25.3501	24.9684	25.2397	25.3929	25.0062	25.4411	25.1281	25.0233	25.148
Q53GF5;A0A024RA52;P25787;H3BT36;C9JCK5;H7C402;Q6MZI6	Q53GF5;A0A024RA52;P25787	Proteasome subunit alpha type;Proteasome subunit alpha type-2	PSMA2			55.1	25.84	0.0134049	1	-0.00442632	-0.0405396	0.997617	0.553908	0.265079	2.12697	27.2477	27.0756	27.1683	27.0451	27.3528	27.0805	27.3454	27.3476	27.5805
A8K410;A0A024RA58;O60443;C9JSR4;A4FVA8;A4FTY0;H7C147;H7BZJ0	A8K410;A0A024RA58;O60443;C9JSR4;A4FVA8;A4FTY0;H7C147	Non-syndromic hearing impairment protein 5	DFNA5			18.3	54.591	1.29814	0.50795	0.206409	2.76995	0.0631688	0.961127	0.0237103	0.18173	24.2804	24.4059	24.5237	24.5721	24.6002	24.6569	24.8329	24.6729	24.3945
A0A2R8Y7W5;A0A2R8Y4Z0;A0A024RA66;A0A024RA85;Q14004;A0A2R8YF61;A0A087X209;A0A2R8YD28;A0A2R8Y644;Q9BVE2;J3QSD7;Q9NYV4;A0A2I6PNI6;A0A2R8Y7Y0;A0A2R8YCQ1	A0A2R8Y7W5;A0A2R8Y4Z0;A0A024RA66;A0A024RA85;Q14004;A0A2R8YF61	Cyclin-dependent kinase 13	CDC2L5;CDK13			13	121.14	0.0645652	0.975359	0.0796661	0.18551	1.50275	0.481858	-0.606807	-3.24841	24.1321	25.4852	25.0571	25.2871	24.8241	24.8022	24.1697	24.4255	24.4977
B7Z7T1;B2RAT5;A0A024RA74;Q8TCY9	B7Z7T1;B2RAT5;A0A024RA74;Q8TCY9	Up-regulator of cell proliferation	URG4;URGCP			4.7	100.25	0.276979	0.897051	-0.0900377	-0.689416	0.332374	0.813735	-0.0855649	-0.806476	24.1418	24.4194	24.1391	24.3219	24.0178	24.0906	24.1645	24.008	24.001
A0A024RA75;P31937;H7BZL2	A0A024RA75;P31937	3-hydroxyisobutyrate dehydrogenase;3-hydroxyisobutyrate dehydrogenase, mitochondrial	HIBADH			31.2	35.329	0.190105	0.918608	0.0644086	0.496639	0.389349	0.795621	0.134776	0.923545	26.1785	26.0312	25.9846	25.9018	26.2049	26.2809	26.3526	26.0863	26.353
A0A024RAC0;Q86V48	A0A024RAC0;Q86V48	Leucine zipper protein 1	LUZP1			8	120.3	0.411587	0.82053	0.116511	0.968527	0.542549	0.705867	0.142826	1.22815	24.6702	24.8821	24.7023	24.6845	25.0313	24.8884	25.122	24.986	24.9247
A0A024RAC5;Q9P258;A5PLK7	A0A024RAC5;Q9P258;A5PLK7	Protein RCC2	RCC2			57.9	56.084	2.23347	0.338044	-0.20546	-5.36121	0.0952843	0.943555	0.0375525	0.266539	29.7142	29.728	29.7458	29.5729	29.4508	29.5479	29.2935	29.6557	29.735
A0A024RAC6;Q14241	A0A024RAC6;Q14241	Transcription elongation factor B polypeptide 3	TCEB3			11.8	87.229	0.50042	0.781319	-0.106944	-1.14538	0.292339	0.83706	-0.0473582	-0.722253	25.9306	25.7802	25.6872	25.5974	25.6742	25.8055	25.6152	25.694	25.6259
A0A0C4DGS1;A0A024RAD5;P39656;U3KQ84	A0A0C4DGS1;A0A024RAD5;P39656;U3KQ84	Dolichyl-diphosphooligosaccharide--protein glycosyltransferase 48 kDa subunit	DDOST			40.8	48.799	0.649907	0.706742	-0.0673434	-1.43761	1.52509	0.486523	-0.11796	-3.30307	26.2367	26.2883	26.3786	26.2159	26.2085	26.2772	26.1698	26.1038	26.0741
A0A024RAE1;Q9UKD2;B4DHZ2	A0A024RAE1;Q9UKD2	mRNA turnover protein 4 homolog	C1orf33;MRTO4			27.2	27.56	0.28478	0.890814	-0.130084	-0.706132	0.166194	0.901453	-0.0979697	-0.440949	26.3573	26.2289	26.3178	26.467	25.8448	26.2019	25.9048	25.9863	26.3287
A0A024RAE4;B4E1U9;P60953;B7ZAY4;B4DMH5;A0A024R9T1;A0A024RAE6;Q5JYX0;Q9UJM1;A0A494C1M1;Q9UJM0;A0A494BZX6;A0A3B3IRV0;F8WET9;B1AH79;Q59FQ0;G3V4H1;G3V476;V9HWD0;Q7Z513;A0A024R692;Q59G91;P17081;Q9H4E5	A0A024RAE4;B4E1U9;P60953;B7ZAY4;B4DMH5;A0A024R9T1;A0A024RAE6	Cell division control protein 42 homolog	CDC42;hCG_39634			42.9	21.258	0.825602	0.6343	0.447618	1.78154	0.84953	0.593127	0.467101	1.82891	26.6321	26.5375	26.6174	26.6053	27.4694	27.0552	27.4042	27.5424	27.5845
B7Z6Y2;A0A024RAI6;A0A024RAG9;A0A024RAG8;A0A024RAE9;A0A024RAI4;A0A024RAI5;A0A024RAJ2;A0A024RAJ3;A0A024RAF0;A0A024RAF6;A0A024RAF1;O00499;Q9BTH3;B7Z2Z2;Q8WWH9	B7Z6Y2;A0A024RAI6;A0A024RAG9;A0A024RAG8;A0A024RAE9;A0A024RAI4;A0A024RAI5;A0A024RAJ2;A0A024RAJ3;A0A024RAF0;A0A024RAF6;A0A024RAF1;O00499;Q9BTH3;B7Z2Z2;Q8WWH9	Myc box-dependent-interacting protein 1	BIN1			29.6	43.165	1.42599	0.49016	0.371184	3.06436	0.52966	0.70937	-0.767155	-1.20288	23.8698	24.222	24.2183	24.4191	24.4742	24.5303	22.4367	24.4212	24.2643
A0A024RAH8;Q9NVP1;Q4ZG72;Q8N254;Q59FR7;H7C452;Q53TI6	A0A024RAH8;Q9NVP1;Q4ZG72	ATP-dependent RNA helicase DDX18	DDX18			42.1	75.406	0.470084	0.793619	-0.131227	-1.08541	0.365208	0.80697	-0.104975	-0.87429	29.0676	29.2042	29.149	29.1739	28.7897	29.0636	28.8458	28.8936	28.9728
A0A024RAI1;P61158;B4DXW1;Q59FV6;B4DTI0;B4DT29;B4E1U3;F8WDR7;F8WEW2;F8WE84;A0A0A0MTI9;H7C4J1;C9IZN3;Q9C0K3	A0A024RAI1;P61158;B4DXW1;Q59FV6;B4DTI0;B4DT29	Actin-related protein 3	ACTR3			51	47.371	0.827792	0.633164	0.104267	1.78587	0.629554	0.67582	0.122191	1.39797	27.9796	28.131	28.0999	28.1032	28.2156	28.2045	28.1391	28.3536	28.3972
A0A024RAJ1;Q92552;G5EA06;D6RH20;B4DT94;B4DKI9;Q6PKB3;Q8N6F2;E5RJ73;D6RJC7	A0A024RAJ1;Q92552;G5EA06;D6RH20;B4DT94;B4DKI9;Q6PKB3;Q8N6F2	28S ribosomal protein S27, mitochondrial	MRPS27			30.9	47.611	0.394767	0.83502	-0.0313848	-0.934537	0.0270508	0.989177	0.00379753	0.0806246	27.3989	27.3876	27.4854	27.4139	27.3953	27.3685	27.3179	27.4746	27.3966
A0A024RAJ6;P07686;Q5URX0;H0YA83;H0Y9B6;D6REQ8	A0A024RAJ6;P07686;Q5URX0	Beta-hexosaminidase;Beta-hexosaminidase subunit beta;Beta-hexosaminidase subunit beta chain B;Beta-hexosaminidase subunit beta chain A	HEXB			26.8	63.111	0.264472	0.900271	0.0595347	0.662437	2.0153	0.3875	0.193119	4.65106	25.8833	26.1191	26.1642	26.0982	26.088	26.159	26.303	26.2501	26.3714
A0A2U3U034;A8K4A0;A0A024RAJ9;P15848	A0A2U3U034;A8K4A0;A0A024RAJ9;P15848	Arylsulfatase B	ARSB			9.3	44.376	0.356697	0.855912	-0.320773	-0.856808	0.654301	0.659536	0.556046	1.44616	23.8739	23.9537	23.9778	23.8872	24.0794	22.8765	24.1893	24.0006	24.3213
A0A0S2Z5E0;A0A024RAK0;A0A0S2Z5D8;Q9HAD4;H0YAA3;D6RH33;D6R9E7;D6RB94;B4DK73;B4DHS8;D6RE66;H0YAI6;D6RA22;H0Y9Z3;D6RBY6;D6RIX6;D6R9M1;D6RJA5;B4E2L4;B4DDS4	A0A0S2Z5E0;A0A024RAK0;A0A0S2Z5D8;Q9HAD4;H0YAA3;D6RH33;D6R9E7;D6RB94;B4DK73;B4DHS8;D6RE66	WD repeat-containing protein 41	WDR41			16.3	51.727	0.550719	0.757645	0.693814	1.24414	0.412227	0.785119	0.074784	0.969817	23.0589	21.5108	23.2802	23.2415	23.3378	23.3521	23.5128	23.3664	23.2765
A0A024RAM0;Q92973;B4DSC0;E7EW37;S4R398;K7ELC3	A0A024RAM0;Q92973	Transportin-1	TNPO1			40	102.35	0.245233	0.906739	0.045791	0.620477	0.730498	0.623569	0.0494626	1.59475	28.7828	29.0272	28.9613	28.9705	28.9503	28.9879	29.0758	29.0012	28.9801
A0A024RAM4;P46821;A2BDK6;Q5H9P1;Q05BW8;D6RA32;Q86X89;Q32NB7;Q6PJD3;A5D6X1;Q4VBY4;D6RA40;A5D8X6;D6RGJ3;D6RCL2	A0A024RAM4;P46821;A2BDK6;Q5H9P1	Microtubule-associated protein 1B;MAP1B heavy chain;MAP1 light chain LC1	MAP1B;DKFZp686F1345			36.7	270.62	0.117931	0.951942	0.0261688	0.323959	0.188342	0.890301	0.030206	0.492579	29.8503	29.6307	29.7566	29.6764	29.844	29.7956	29.7652	29.7677	29.8738
A8K6H1;A0A0A7E7X3;A0A0A7E7W9;A0A0A7E7W5;A0A0A7E7T3;A0A0A7E7S5;A0A0A7E6P9;A0A0A7E6P4;A0A0A7E6P0;A0A0A7E6I2;A0A0A7E6D8;A0A0A7E6D4;A0A024RAR8;Q9NZ08;A0A0A7E6K0;A0A0A7E6J5;A0A075BSP6;A0A075BW43;A0A075BTL2;A0A075BV59;Q53GQ8;H0Y9X5	A8K6H1;A0A0A7E7X3;A0A0A7E7W9;A0A0A7E7W5;A0A0A7E7T3;A0A0A7E7S5;A0A0A7E6P9;A0A0A7E6P4;A0A0A7E6P0;A0A0A7E6I2;A0A0A7E6D8;A0A0A7E6D4;A0A024RAR8;Q9NZ08;A0A0A7E6K0;A0A0A7E6J5;A0A075BSP6;A0A075BW43;A0A075BTL2;A0A075BV59	Endoplasmic reticulum aminopeptidase 1	ERAP1;ARTS-1			12.2	107.18	0.175143	0.92631	-0.0519625	-0.461951	0.247223	0.851798	-0.0919882	-0.624845	25.7282	25.9817	25.9681	25.9924	25.7454	25.7844	25.7947	25.5117	25.9398
A0A024RAS3;Q9H0S4;Q53GJ1;Q9H4E3;B4DYP6;Q7Z4B1;A4UCU0;F5H1N9	A0A024RAS3;Q9H0S4;Q53GJ1;Q9H4E3	Probable ATP-dependent RNA helicase DDX47	hCG_27698;DDX47;E4-DBP			30.3	50.646	0.455116	0.803034	-0.0687523	-1.05568	0.352492	0.807939	-0.192422	-0.848148	25.5543	25.7066	25.5087	25.5295	25.5608	25.4731	25.7787	25.1272	25.0802
A0A024RAV0;P54687;F5H2F2;A0A087WYF2	A0A024RAV0;P54687	Branched-chain-amino-acid aminotransferase;Branched-chain-amino-acid aminotransferase, cytosolic	BCAT1			25.4	42.966	0.526567	0.771737	0.136811	1.19681	0.150489	0.911175	-0.048317	-0.403604	25.233	25.4022	25.5674	25.4909	25.6591	25.463	25.2977	25.6499	25.5205
A0A024RAV2;P46063;F8WA66;F8WD97;F5H2L2;F5H4P4;F5H3W0;F5GYB7	A0A024RAV2;P46063	ATP-dependent DNA helicase Q1	RECQL			32.2	73.457	0.208992	0.907792	0.0400022	0.539728	0.768986	0.60133	-0.140478	-1.6701	27.1266	27.022	27.1212	27.256	27.0999	27.0339	27.0829	26.902	26.9835
F8W6I7;A0A024RB53;A0A024RAZ7;P09651;Q6IPF2;Q9BSM5;A0A024RC46;Q0VAC0;F8VZ49;A0A024QZ98;Q32P51;B4DP35;F8W646;F8VYN5;F8VTQ5;B4E0B5;A0A2R8Y4L2;H0YH80;Q3MI39	F8W6I7;A0A024RB53;A0A024RAZ7;P09651;Q6IPF2;Q9BSM5;A0A024RC46;Q0VAC0;F8VZ49;A0A024QZ98;Q32P51;B4DP35;F8W646;F8VYN5;F8VTQ5;B4E0B5;A0A2R8Y4L2	Heterogeneous nuclear ribonucleoprotein A1;Heterogeneous nuclear ribonucleoprotein A1, N-terminally processed;Heterogeneous nuclear ribonucleoprotein A1-like 2	HNRNPA1;HNRPA1;hCG_2020860;RP11-78J21.1;HNRNPA1L2			54.4	33.155	0.00269831	1	0.000509898	0.00825856	0.134778	0.923444	-0.0669683	-0.365567	30.6798	30.7332	30.7029	30.6978	30.6065	30.8131	30.3027	30.7346	30.8791
A0A024RB10;A0A024RB77;G3V5T9;P24941;E7ESI2;B4DDL9;A0A024R8R3;Q00526;K7ELV5;K7EJ83;G3V317	A0A024RB10;A0A024RB77;G3V5T9;P24941;E7ESI2;B4DDL9	Cyclin-dependent kinase 2	CDK2			55.3	30.035	0.00904809	0.997524	0.00557137	0.0274956	0.0402367	0.976086	0.0286961	0.118325	24.926	25.3266	25.1904	25.0165	25.4817	24.9615	25.5347	24.9681	25.043
A0A024RB14;P62854;Q75MH1;Q5JNZ5;Q76N57	A0A024RB14;P62854;Q75MH1;Q5JNZ5	40S ribosomal protein S26;Putative 40S ribosomal protein S26-like 1	RPS26;RPS26P11			40	13.015	0.141466	0.938341	0.0606416	0.381845	0.343375	0.813559	0.196349	0.829312	29.3638	29.2447	29.1688	29.032	29.4011	29.5261	29.1644	29.5948	29.789
B3KMV5;A0A024RB17;A0A024RB16;Q9BSJ8;B3KY56;F8VZB1	B3KMV5;A0A024RB17;A0A024RB16;Q9BSJ8;B3KY56	Extended synaptotagmin-1	FAM62A;ESYT1			27.2	122.9	0.321015	0.871741	0.0730025	0.782764	0.771987	0.60191	-0.060201	-1.67599	27.7247	27.486	27.7712	27.7338	27.6818	27.7854	27.7048	27.6366	27.6789
A0A024RB22;Q8TAQ2;Q59G16;F8VXC8;B4DF22;Q658P9;F8VZW6	A0A024RB22;Q8TAQ2;Q59G16;F8VXC8;B4DF22	SWI/SNF complex subunit SMARCC2	SMARCC2			30.1	132.88	0.895192	0.618753	-0.101283	-1.91985	1.0343	0.543614	-0.140089	-2.2024	27.5096	27.5062	27.5758	27.4093	27.3585	27.5199	27.3514	27.3073	27.2088
A0A024RB27;Q504R6;P51153;D3DV69;A0A087WWB9	A0A024RB27;Q504R6;P51153;D3DV69;A0A087WWB9	Ras-related protein Rab-13	hCG_24991;RAB13;hCG_1996054			30	22.745	0.174835	0.926453	-0.0503731	-0.461231	1.15273	0.522143	0.262076	2.45124	25.9655	25.8637	25.8074	25.6308	25.9208	25.934	26.0251	26.082	26.1647
A0A024RB32;A0A087WYT3;B3KUY2;Q15185;B4DDC6	A0A024RB32;A0A087WYT3;B3KUY2;Q15185	Prostaglandin E synthase 3	PTGES3			34.4	18.697	0.130111	0.944854	-0.0271759	-0.354131	1.33778	0.470949	-0.0912736	-2.85971	27.3755	27.1339	27.2728	27.1741	27.2456	27.2809	27.1353	27.1533	27.1383
Q53FU3;A0A024RB72;F8VVA7;P61923;F8VXB1;F8VUC5;F8W156;F8W651;F8VYZ4;F8VXR1;F8VYK5	Q53FU3;A0A024RB72;F8VVA7;P61923;F8VXB1;F8VUC5;F8W156;F8W651;F8VYZ4;F8VXR1	Coatomer subunit zeta-1	COPZ1			35	20.267	0.707438	0.672841	0.291052	1.54973	0.278967	0.838555	-0.0917994	-0.693684	25.7081	25.3929	25.8726	26.0918	26.0538	25.7012	25.9103	25.7672	25.8939
B4DJV2;A0A024RB75;O75390;B3KTN4;A0A0C4DGI3;H0YIC4;Q0QEL2;F8VTT8;F8W4S1;H0YH82;B7Z1E1;F8VPF9;F8VPA1;F8W1S4;F8W642;F8VZK9;F8VX07;F8VRP1;F8VX68;F8VRI6;F8VWQ5;F8VU34;F8VR34;F8W0J2;F8VP03;F8W031	B4DJV2;A0A024RB75;O75390;B3KTN4;A0A0C4DGI3	Citrate synthase;Citrate synthase, mitochondrial	CS			32.7	50.431	0.193861	0.915991	0.0187384	0.505269	0.415192	0.78585	0.0766996	0.975789	29.6651	29.6325	29.6012	29.6157	29.6235	29.7159	29.6551	29.6582	29.8718
A0A024RB85;Q9UQ80;A8K6Y1;Q6PIN5;Q05D08;F8VR77;H0YIN7;F8W0A3;F8VZ69	A0A024RB85;Q9UQ80;A8K6Y1;Q6PIN5;Q05D08	Proliferation-associated protein 2G4	PA2G4			48.2	43.786	0.137245	0.940641	0.0738386	0.371588	0.370925	0.804352	0.108389	0.885998	28.7832	28.2386	28.6214	28.39	28.7299	28.7448	28.807	28.678	28.7048
A0A024RB99;V9HW06;P34897;Q5HYG8;Q53ET4;B4DJQ3;B4E1G2;B4DP88;Q5BJF5;B4DW25;B4DWA7;B4DJ63;B4DLV4;H0YIZ0;G3V2Y4;G3V5L0;G3V4W5;G3V540;G3V2W0;G3V241;G3V3Y8;G3V4T0;G3V4X0;G3V2E4;G3V2D2;G3V2Y1;G3V3C6	A0A024RB99;V9HW06;P34897;Q5HYG8;Q53ET4;B4DJQ3;B4E1G2;B4DP88;Q5BJF5;B4DW25;B4DWA7;B4DJ63;B4DLV4;H0YIZ0	Serine hydroxymethyltransferase;Serine hydroxymethyltransferase, mitochondrial	SHMT2;HEL-S-51e;DKFZp686P09201			74.5	53.454	0.483849	0.791156	-0.0953293	-1.11267	0.409573	0.785118	0.0896848	0.964468	31.4257	31.7007	31.5491	31.5226	31.4536	31.4135	31.3785	31.65	31.6301
A0A024RBB5;Q16527;F8VQR7;F8VW96	A0A024RBB5;Q16527;F8VQR7;F8VW96	Cysteine and glycine-rich protein 2	CSRP2			48.7	20.954	0.226809	0.906164	0.0397466	0.579724	0.092593	0.944227	0.0472018	0.259592	26.8538	26.854	26.9884	26.8572	27.035	26.9232	26.652	27.0653	27.2397
F8VUX1;F8VY35;F8W0J6;F5H4R6;B7Z2V4;A0A024RBB7;P55209;H0YIV4;F8W020;F8VXI6;F8VV59;B7Z9C2;A0A024RBE6;B7Z5H0;F8VVB5;F8W543;H0YHC3;F8W118;H0YH88;F8VRJ2;B7Z4K9	F8VUX1;F8VY35;F8W0J6;F5H4R6;B7Z2V4;A0A024RBB7;P55209;H0YIV4;F8W020;F8VXI6;F8VV59;B7Z9C2;A0A024RBE6;B7Z5H0;F8VVB5;F8W543	Nucleosome assembly protein 1-like 1	NAP1L1			63.3	27.724	0.200778	0.912975	-0.0763988	-0.521081	0.261472	0.847562	-0.113575	-0.655932	27.9235	27.915	28.1885	28.1322	27.7307	27.9349	27.682	27.6989	28.0761
A0A024RBB8;Q5HYM3;Q9BZF1;F8VQX7;Q641R2;Q96E43;F8VUA7;F8VZ43;Q96N80;F8VZB8;F8W060;F8VVD3;F8VVE7;Q6ZME5	A0A024RBB8;Q5HYM3;Q9BZF1;F8VQX7;Q641R2;Q96E43	Oxysterol-binding protein;Oxysterol-binding protein-related protein 8	OSBPL8;DKFZp686C0249			20.1	101.19	0.0786374	0.972129	-0.0188643	-0.223114	0.156938	0.907395	0.0624593	0.419019	25.372	25.4874	25.3576	25.5311	25.287	25.3422	25.209	25.4857	25.653
A0A024RBB9;Q9Y2U8;B4E2K7;B4DI45	A0A024RBB9;Q9Y2U8	Inner nuclear membrane protein Man1	LEMD3			17.2	99.996	1.35107	0.515	0.260902	2.8901	0.0882647	0.947528	-0.0175858	-0.248361	24.9326	24.8061	24.7032	24.9533	25.1484	25.1229	25.1284	25.0218	25.0216
A0A024RBC7;P20020;E7ERY9;Q59H63;A1X4P8;Q58F24;A1X4P7;H0YHH6;Q3L582;A0A0U1RQU3;A1X4P9	A0A024RBC7;P20020;E7ERY9;Q59H63	Calcium-transporting ATPase;Plasma membrane calcium-transporting ATPase 1	ATP2B1			8.9	134.68	1.01863	0.552543	0.252199	2.17009	0.195406	0.884829	-0.05638	-0.508809	24.525	24.7006	24.8607	24.9029	24.866	25.0741	25.0582	24.7477	24.868
F8VUB4;F8VV52;B3KTL6;A0A024RBD8;Q9NZN8;F8VRS8;F8W145;F8VP97;B2RDX7;F8VQD8;A0A087X050;F8VVY1;H0YI11;H0YH84;F8VX63;F8VWH8;F8VQF4	F8VUB4;F8VV52;B3KTL6;A0A024RBD8;Q9NZN8;F8VRS8;F8W145;F8VP97;B2RDX7	CCR4-NOT transcription complex subunit 2	CNOT2			16	57.419	0.0387527	0.988946	0.0222022	0.11413	0.395656	0.795357	-0.964163	-0.936338	24.738	24.8721	25.3368	25.1303	24.8874	24.9959	21.9859	25.0943	25.0408
A8K1Z3;A0A024RBE5;Q8NHV4;Q05CT8	A8K1Z3;A0A024RBE5;Q8NHV4;Q05CT8	Protein NEDD1	NEDD1			17.6	71.925	1.98718	0.378366	0.24105	4.56501	0.199431	0.88238	0.0578251	0.51801	24.886	24.7466	24.7291	25.0641	25.0073	25.0135	24.9206	25.2948	25.043
A0A024RBE7;P42167;G5E972;A0A024RBH7;Q59G12;H0YJH7;Q9P1N8	A0A024RBE7;P42167;G5E972;A0A024RBH7;Q59G12;H0YJH7	Lamina-associated polypeptide 2, isoforms beta/gamma;Thymopoietin;Thymopentin	TMPO			43.6	50.67	0.859013	0.630037	0.241524	1.84773	0.0788	0.953595	0.0185763	0.223543	26.8147	26.4841	26.8661	26.8602	26.9963	27.0331	27.0411	27.0509	26.8532
Q8NCF7;A0A024RBE8;A0A024RBH9;Q00325;B2RE88;F8VVM2;Q53HC3;F8VZL5;F8VWR4;F8VWQ0	Q8NCF7;A0A024RBE8;A0A024RBH9;Q00325;B2RE88;F8VVM2;Q53HC3	Phosphate carrier protein, mitochondrial	SLC25A3			39.9	39.932	1.32608	0.509504	-0.199215	-2.83307	0.2836	0.840641	0.104895	0.70361	30.0499	29.9801	30.0879	29.9293	29.872	29.7188	29.7266	29.916	30.1923
A0A024RBH2;Q07065;Q8TB01;Q6NWZ1;B3KVX6;H3BUW6;Q59G85;H3BN64;A0A024R9K5;H3BRM1;H3BRF9;Q96K21	A0A024RBH2;Q07065;Q8TB01;Q6NWZ1;B3KVX6	Cytoskeleton-associated protein 4	CKAP4			60.1	66.022	0.316097	0.874598	0.0485471	0.772456	0.789106	0.601456	0.0525017	1.70961	28.3187	28.4788	28.4903	28.5372	28.4487	28.4475	28.5449	28.5181	28.528
Q53G58;A0A024RBI5;Q59EA2;Q9ULV4;B3KN06;B4E3S0;B4DMH3;B7Z9V0;H0YHL7;F8W1H8;F8VUX3;F8VSA4;F8VRE9;F8VTT6;F8VVB7;F8VV53;B3KRY9;B3KSZ9;J3QLV6;J3KSS5;Q6QEF8	Q53G58;A0A024RBI5;Q59EA2;Q9ULV4;B3KN06;B4E3S0;B4DMH3;B7Z9V0;H0YHL7	Coronin;Coronin-1C	CORO1C			52.3	53.28	0.00104305	0.999571	-0.000300725	-0.00319843	0.44435	0.763312	0.121596	1.03422	28.8389	28.7954	28.7618	28.9795	28.7287	28.6871	28.7945	28.9147	29.0508
E7CEM8;F5GZ49;I3P687;F5H0U5;A0A024RBI7;Q9NZD2	E7CEM8;F5GZ49;I3P687;F5H0U5;A0A024RBI7;Q9NZD2	Glycolipid transfer protein	GLTP			44.1	3.7714	0.0942127	0.966328	0.141528	0.263776	1.8032	0.416044	0.470097	4.03009	22.5523	22.5785	20.9634	22.072	22.2038	22.243	22.4473	22.6772	22.8046
B3KMP2;Q2M2R1;Q4KMX6;A8KAQ7;A0A024RBJ3;Q9UJX3;A5D8X2;H0YIX7	B3KMP2;Q2M2R1;Q4KMX6;A8KAQ7;A0A024RBJ3;Q9UJX3;A5D8X2	Anaphase-promoting complex subunit 7	ANAPC7			15.7	56.313	0.544755	0.763492	-0.113436	-1.23247	0.0302896	0.984946	0.00727463	0.0899752	25.474	25.204	25.3765	25.1438	25.2776	25.2927	25.1853	25.1744	25.3763
Q8TBK5;Q8N5Z7;A0A024RBK3;Q9HBB3;Q02878;B2R4K7;B4DRX3;F8VZ45;U3KQR5;F8VR69;F8VZA3;F8VWR1;F8VU16	Q8TBK5;Q8N5Z7;A0A024RBK3;Q9HBB3;Q02878;B2R4K7;B4DRX3	60S ribosomal protein L6	RPL6			51.4	32.741	0.709598	0.674223	-0.224173	-1.55394	0.187694	0.890604	-0.211134	-0.491083	32.9317	33.3932	33.1912	32.9572	32.8491	33.0374	31.9174	32.9411	33.3517
E9PIR7;B2R5P6;F8W809;B7Z2S5;A0A087WSW9;A0A182DWI3;A0A024RBK9;A0A140VKC9;A0A087WSY9;Q16881;Q6ZR44;E2QRB9;E9PKD3;E9PLT3;E9PKI4;A0A0B4J225;E9PIZ5;E9PQI3;E9PJU2	E9PIR7;B2R5P6;F8W809;B7Z2S5;A0A087WSW9;A0A182DWI3;A0A024RBK9;A0A140VKC9;A0A087WSY9;Q16881;Q6ZR44;E2QRB9	Thioredoxin reductase 1, cytoplasmic	TXNRD1			31.7	53.166	1.35685	0.513124	0.571756	2.90336	0.0703818	0.957835	0.0157502	0.201158	24.9771	25.476	25.6039	26.0097	25.8474	25.9151	25.8255	26.0411	25.9529
A0A024RBQ4;A0A024RBL6;O15119;B4E3A6	A0A024RBQ4;A0A024RBL6;O15119;B4E3A6	T-box transcription factor TBX3	TBX3			5.7	77.178	0.0407864	0.990351	-0.0215886	-0.119876	0.274098	0.842599	-0.132788	-0.683221	23.2987	23.6328	23.5889	23.7505	23.2451	23.4599	23.1442	23.5849	23.3281
Q9UPN1;F8VYE8;A0A024RBP2;P36873;F8VR82;F8W0W8;A0A087WYY5	Q9UPN1;F8VYE8;A0A024RBP2;P36873;F8VR82;F8W0W8;A0A087WYY5	Serine/threonine-protein phosphatase;Serine/threonine-protein phosphatase PP1-gamma catalytic subunit	PPP1CC			65.3	33.773	0.621723	0.722303	2.19231	1.38271	0.346122	0.811849	0.196888	0.834995	26.0345	26.1887	21.3888	26.3774	26.9926	26.819	27.1566	26.9743	26.6487
F8VVL1;A0A024RBR3;O43583	F8VVL1;A0A024RBR3;O43583	Density-regulated protein	DENR			29.4	17.77	0.729308	0.668523	0.154595	1.59243	1.77372	0.39436	0.182178	3.94862	23.9308	23.7154	24.0372	24.0868	24.0485	24.0121	24.3129	24.1914	24.1896
A0A024RBR4;O75146;B4DI31;B3KN98;B4DPL0;B3KQW8	A0A024RBR4;O75146	Huntingtin-interacting protein 1-related protein	HIP1R			12.4	99.089	0.416851	0.814019	-0.116049	-0.979126	0.162095	0.90411	-0.0949103	-0.431265	25.7738	26.037	25.6588	25.7711	25.7138	25.6366	25.1872	25.7524	25.8971
A8K4Z4;A0A024RBS2;P05388;Q53HW2;Q53HK9;F8VU65;Q6NSF2;F8VWS0;F8VPE8;Q8NHW5;G3V210;F8VW21;F8VQY6;F8VRK7;B4E3D5;F8VWV4;F8VS58;F8VZS0;F8W1K8;Q3MHV2	A8K4Z4;A0A024RBS2;P05388;Q53HW2;Q53HK9;F8VU65;Q6NSF2;F8VWS0;F8VPE8;Q8NHW5;G3V210;F8VW21;F8VQY6;F8VRK7;B4E3D5;F8VWV4;F8VS58;F8VZS0	60S acidic ribosomal protein P0;60S acidic ribosomal protein P0-like	RPLP0;RPLP0P6			54.6	34.239	0.24187	0.906262	-0.0531025	-0.613081	0.574529	0.690481	-0.0821648	-1.29069	29.7565	29.4802	29.7046	29.6003	29.621	29.5608	29.6067	29.5312	29.3975
C9JE98;A0A024RBU9;C9J0Q5;C9JFD3;A0A024RBS3;Q9Y618;A0A481PGK9;C9J7T7;A0A384DVL6;C9JQE8;H7C1J7;H7C1Y3;H0YGK8;C9J330;Q9BT61	C9JE98;A0A024RBU9;C9J0Q5;C9JFD3;A0A024RBS3;Q9Y618;A0A481PGK9;C9J7T7;A0A384DVL6	Nuclear receptor corepressor 2	NCOR2			2.9	268.04	0.251433	0.901452	0.0853628	0.634063	1.697	0.415061	-0.464115	-3.74174	24.1756	24.5015	24.1227	24.231	24.4487	24.3762	24.0007	23.9875	23.6755
A0A024RBU8;P41247;C9IZF6	A0A024RBU8;P41247;C9IZF6	Patatin-like phospholipase domain-containing protein 4	PNPLA4			43.5	27.98	0.874001	0.62657	-1.02804	-1.87755	0.502937	0.730047	0.747704	1.15034	23.3416	23.1802	23.0628	23.2473	21.5615	21.6917	22.1974	23.3166	23.2297
A0A024RBV2;Q86V21;Q49AJ4;E7EW25;B4E296;Q9H7A6	A0A024RBV2;Q86V21	Acetoacetyl-CoA synthetase	AACS			4.8	75.143	0.261459	0.901474	-0.0564384	-0.655903	0.0715149	0.957181	0.0696621	0.204189	23.1404	22.9499	22.8998	22.8773	22.9157	23.0278	22.3356	23.3016	23.3926
A0A024RBX6;O00625	A0A024RBX6;O00625	Pirin	PIR			16.6	32.113	0.868439	0.627492	0.198238	1.86648	1.06976	0.529184	0.294971	2.27601	25.1912	25.0729	24.9974	25.1449	25.4531	25.2583	25.7667	25.4801	25.4944
A0A024RBX9;P08559;A5YPB6;Q53GE3;A5PHJ9;Q5JPU3;Q5JPT9;Q5JPU0;Q5JPU1;Q6LCA3;Q9UNV7;Q99725;P78557;P29803;Q36750;Q99724	A0A024RBX9;P08559;A5YPB6;Q53GE3;A5PHJ9	Pyruvate dehydrogenase E1 component subunit alpha;Pyruvate dehydrogenase E1 component subunit alpha, somatic form, mitochondrial	PDHA1;PDHA1/LOC79064			46.4	43.295	0.220966	0.906509	0.0379168	0.566673	0.389342	0.795195	-0.102343	-0.923531	27.4071	27.4284	27.404	27.3476	27.5751	27.4305	27.4758	27.1781	27.3922
Q68D50;A0A024RBY9;P53701	Q68D50;A0A024RBY9;P53701	Cytochrome c-type heme lyase	DKFZp779I1858;HCCS			22.4	30.529	0.997514	0.564418	0.13431	2.12676	0.0188544	0.988881	-0.00525411	-0.0566845	23.1236	23.3084	23.2315	23.4105	23.2952	23.3608	23.4491	23.4237	23.1779
A0A024RC00;Q9NRF8;H0Y5S6	A0A024RC00;Q9NRF8	CTP synthase;CTP synthase 2	CTPS2			21.3	65.677	0.184895	0.91942	0.0558821	0.484619	0.495045	0.738233	0.13868	1.13478	24.4226	24.4928	24.1721	24.4873	24.4729	24.295	24.3506	24.6232	24.6974
B2RAE8;A0A024RC14;Q1RN33;A0A024RC12;B4DTE6;P43362;P43358;P43363	B2RAE8;A0A024RC14;Q1RN33;A0A024RC12;B4DTE6;P43362;P43358;P43363	Melanoma-associated antigen 9;Melanoma-associated antigen 4;Melanoma-associated antigen 10	MAGEA10;MAGEA4;MAGEA9			6.5	40.708	0.68629	0.689607	0.137081	1.50848	0.48706	0.743364	0.123226	1.11901	23.8579	23.6988	23.8865	23.8186	23.9817	24.0541	24.1647	23.9042	24.1552
A0A024RC33;Q15555;K7EL66;K7ERD8;M0QX52	A0A024RC33;Q15555;K7EL66;K7ERD8	Microtubule-associated protein RP/EB family member 2	MAPRE2			18	37.031	0.107253	0.955558	0.0363655	0.29711	0.415005	0.785107	-0.177406	-0.975411	24.6995	24.5088	24.5984	24.5929	24.4764	24.8466	24.5528	24.1765	24.6544
A0A024RC37;Q96P16;A0A0C4DGQ6;K7EP82;K7ER50;K7EQR8;E9PIQ9	A0A024RC37;Q96P16;A0A0C4DGQ6	Regulation of nuclear pre-mRNA domain-containing protein 1A	P15RS;RPRD1A			34.6	35.719	0.140375	0.938656	0.0275968	0.379199	0.235869	0.856722	0.0875594	0.599838	26.3517	26.1764	26.2451	26.3884	26.2445	26.223	26.3617	26.1424	26.6146
A0A024RC42;P19022	A0A024RC42;P19022	Cadherin-2	CDH2			7.1	99.808	0.0134374	1	-0.0116819	-0.0406367	0.459428	0.756015	0.259741	1.06425	22.6815	22.5993	23.1146	22.8365	23.1735	22.3504	23.0612	23.1245	22.9539
J3KSG1;A0A024RC45;J3QRK1;A0A2U3U043;Q719H9;E9PK99;E9PMS5;E9PRT1;E9PJJ5;Q4G0X4	J3KSG1;A0A024RC45;J3QRK1;A0A2U3U043;Q719H9	BTB/POZ domain-containing protein KCTD1	KCTD1			16.3	23.806	0.250706	0.90157	-0.128997	-0.632472	0.200721	0.882221	0.101454	0.52095	22.8332	23.0527	22.7873	23.0099	22.8803	22.3961	22.9712	22.8304	22.7891
A0A024RC47;P17028;K7EQP8;K7EPZ8;K7EPL1	A0A024RC47;P17028	Zinc finger protein 24	ZNF24			14.4	42.128	1.51535	0.469975	-1.16947	-3.27916	0.045761	0.971292	0.0659612	0.13384	23.0238	23.9031	24.0548	22.5143	22.2125	22.7465	22.499	23.3951	21.7771
A4QPB0;A0A024RC65;P46940;A0A0J9YXZ5;H0YLE8;B4E2M0;Q6P1N4;Q5FWG8;Q05DN7;B4DNP4;Q96PA3;H0YKA5;A0A087X225;A0A087WWP1;E9PDT6	A4QPB0;A0A024RC65;P46940;A0A0J9YXZ5;H0YLE8;B4E2M0;Q6P1N4	Ras GTPase-activating-like protein IQGAP1	IQGAP1;hCG_1991735			48.8	189.28	0.708837	0.673483	0.0482585	1.55246	1.3044	0.490455	0.117743	2.78404	29.7981	29.7963	29.7202	29.8387	29.7847	29.8359	30.0132	29.8875	29.912
A0A024RC75;O14647;A0A1B0GTU9;A8K9Y5;B3KT33;A0A0D9SF92;Q3YLD5;A0A0D9SFA3;Q3YLD6;A0A1B0GU59;A0A0D9SGK0;Q8N677;B7Z3I4	A0A024RC75;O14647;A0A1B0GTU9;A8K9Y5	Chromodomain-helicase-DNA-binding protein 2	CHD2			8.1	200.56	0.990505	0.568974	-0.34153	-2.11243	0.445258	0.763339	-0.160604	-1.03603	24.5963	24.9048	24.4328	24.3636	24.4078	24.1379	24.0327	24.4026	23.9922
A0A024RC87;A0A140VJT8;P13489;E9PIM9;E9PMJ3;E9PLZ3;E9PIK5;E9PMN0;H0YCR7;E9PMA9;E9PR82;E9PMI1	A0A024RC87;A0A140VJT8;P13489;E9PIM9;E9PMJ3;E9PLZ3	Ribonuclease inhibitor	RNH1			48.7	49.416	0.515877	0.778978	0.0726802	1.17581	0.24051	0.856086	0.0717506	0.610084	27.2083	27.3337	27.3398	27.2882	27.3693	27.4425	27.5905	27.4972	27.2275
A0A024RC97;Q9BVG9;E9PS47;E9PLE4;A0A0J9YWQ2	A0A024RC97;Q9BVG9;E9PS47;E9PLE4;A0A0J9YWQ2	Phosphatidylserine synthase 2	PTDSS2			8.6	56.252	0.389307	0.840019	-0.489066	-0.923459	0.0358198	0.978027	-0.088721	-0.105804	23.7131	24.0031	24.057	23.8889	24.0166	22.4005	22.0371	23.8747	24.128
A0A024RCA7;P05387;H0YDD8	A0A024RCA7;P05387;H0YDD8	60S acidic ribosomal protein P2	RPLP2			84.3	11.665	0.0625895	0.977367	0.0351855	0.18016	0.183027	0.892456	-0.0760365	-0.480294	25.0892	25.7089	25.3748	25.5722	25.306	25.4002	25.1112	25.5886	25.3506
A0A024RCB5;B7Z705;B4DN31;Q9BWS9;E9PPA0;E9PI70;E9PIP0;E9PRL3;E9PPH0;E9PKF1;H0YC89	A0A024RCB5;B7Z705;B4DN31;Q9BWS9;E9PPA0;E9PI70;E9PIP0;E9PRL3;E9PPH0;E9PKF1	Chitinase domain-containing protein 1	CHID1			17.4	44.117	0.221595	0.907459	-0.0534356	-0.568081	0.307088	0.82386	0.0770245	0.753498	26.0794	25.9474	26.14	26.0289	25.8611	26.1165	25.9419	26.167	26.1288
E9PJK1;E9PRJ8;H0YDL9;H0YDJ9;A0A024RCB7;E9PIF1;A6NMH8;P60033;E9PM31;H0YEE2	E9PJK1;E9PRJ8;H0YDL9;H0YDJ9;A0A024RCB7;E9PIF1;A6NMH8;P60033	Tetraspanin;CD81 antigen	CD81			35.8	17.963	0.254265	0.903209	0.127893	0.640248	0.868197	0.59103	-0.29032	-1.86599	23.3188	23.5219	23.7903	23.8487	23.7836	23.3825	23.4898	23.3224	23.3316
A0A024RCC9;B7ZAK9;B7ZB83;Q99733;B4DS05;A0A2U9QGI0;E9PNW0;E9PJJ2;E9PS34;E9PNJ7;A8MXH2;C9J6D1;C9JZI7;B7ZAC7;E9PP22;E9PKI2;E9PKT8;C9J1B1;H0YCI4	A0A024RCC9;B7ZAK9;B7ZB83;Q99733;B4DS05;A0A2U9QGI0;E9PNW0;E9PJJ2;E9PS34;E9PNJ7;A8MXH2;C9J6D1;C9JZI7;B7ZAC7;E9PP22;E9PKI2;E9PKT8	Nucleosome assembly protein 1-like 4	NAP1L4			28.3	42.823	0.386877	0.837218	-0.0469856	-0.918522	1.14144	0.517832	0.169069	2.42715	26.9006	26.9498	27.0332	26.8495	26.9612	26.9319	27.1969	26.9876	27.0653
A8MVQ3;B4DKY1;A0A024RCG3;B4DPV7;P49589;B4DI19;A8K067;Q53HG6;Q59HE5;E9PRS8	A8MVQ3;B4DKY1;A0A024RCG3;B4DPV7;P49589;B4DI19;A8K067;Q53HG6	Cysteine--tRNA ligase, cytoplasmic	CARS			19.5	84.471	0.681636	0.691682	0.150535	1.49941	0.304123	0.827314	0.0508982	0.747239	26.3942	26.1975	26.0997	26.2991	26.474	26.3699	26.4942	26.3436	26.4579
A8K5M7;A0A024RCG7;Q7L311	A8K5M7;A0A024RCG7;Q7L311	Armadillo repeat-containing X-linked protein 2	ARMCX2			10.3	65.733	0.589575	0.748217	0.140496	1.32005	0.607244	0.68382	-0.0991872	-1.3545	24.0422	24.0315	24.2835	24.2272	24.3892	24.1622	24.1037	24.1917	24.1856
A0A024RCM3;Q13838;Q5STU3;F6WLT2;A0A0G2JJZ9;A0A140T9X3;B4DP52;A0A0A0MT12;F6TRA5;Q59G92;F6S4E6;A0A140T996;A0A140T9X9;F6UJC5;A0A140TA18;B4DIJ6;A0A140T973;A0A140T9K1;B4DIZ8;A0A140T9L4;F6R6M7;Q7KYK3;H0Y400;F6QYI9;A0A0G2JJL7;A0A0G2JHN7;F6U6E2;F6S2B7;A0A286SD52;F6SXL5;B4DH55;H0YCC6;A0A286SD68;A0A286SD67;A0A286SD65;A0A286SD64;A0A286SD63;A0A286SD59;A0A140T9K2;A0A140T9N3	A0A024RCM3;Q13838;Q5STU3;F6WLT2;A0A0G2JJZ9;A0A140T9X3;B4DP52;A0A0A0MT12;F6TRA5;Q59G92;F6S4E6;A0A140T996;A0A140T9X9;F6UJC5;A0A140TA18	Spliceosome RNA helicase DDX39B	hCG_2005638;DDX39B			56.3	48.991	0.642038	0.709418	-0.146666	-1.42228	0.421458	0.777561	-0.107665	-0.988387	29.175	28.9939	29.1852	29.0852	28.8115	29.0173	28.9284	28.7211	28.9415
A0A1U9X9D5;A0A1U9X9C7;A0A1U9X9C4;A0A1U9X9A1;A0A024RCN6;P26640;A0A1U9X9C8;A0A1U9X9C1;A0A1U9X9A3;A0A140T936;B4DT32;A0A140T954;H0Y426;A2ABF4;A0A0G2JJT9;A0A140T904	A0A1U9X9D5;A0A1U9X9C7;A0A1U9X9C4;A0A1U9X9A1;A0A024RCN6;P26640;A0A1U9X9C8;A0A1U9X9C1;A0A1U9X9A3;A0A140T936	Valine--tRNA ligase	VARS			47	140.46	0.640184	0.710559	-0.0848014	-1.41867	0.625144	0.680793	-0.0789477	-1.38938	30.4284	30.5034	30.3996	30.4272	30.2589	30.3909	30.2331	30.3171	30.29
A0A0G2JIS2;A0A1U9X7P8;A0A024RCN9;Q96KQ7;A0A0G2JRR0;A0A0G2JRN8;Q59FM7;B7Z852;A2ABF8;A0A0G2JIR1;A2ABF9;A0A0G2JK64;H0Y4K5	A0A0G2JIS2;A0A1U9X7P8;A0A024RCN9;Q96KQ7;A0A0G2JRR0;A0A0G2JRN8;Q59FM7;B7Z852;A2ABF8;A0A0G2JIR1;A2ABF9;A0A0G2JK64	Histone-lysine N-methyltransferase EHMT2	EHMT2			5	129.03	0.276554	0.897034	0.194071	0.688503	2.36927	0.442087	0.357981	5.84484	24.2195	23.6027	24.5488	24.2202	24.3903	24.3427	24.72	24.6079	24.6992
B4DYK6;A0A1U9X7R2;A0A024RCR2;P36915;B7ZAS6;B4DNS8;Q6P458;Q0EFC6;B4DWZ0;A0A140T8Y2;Q96QB8;Q86Z07;A8MPZ0;A2AB27	B4DYK6;A0A1U9X7R2;A0A024RCR2;P36915;B7ZAS6;B4DNS8;Q6P458;Q0EFC6;B4DWZ0;A0A140T8Y2;Q96QB8;Q86Z07;A8MPZ0	Guanine nucleotide-binding protein-like 1	GNL1;HSR1			14.5	68.255	0.605476	0.734097	-0.130019	-1.35106	0.273668	0.842238	-0.0476462	-0.682296	25.3529	25.5878	25.572	25.2823	25.3552	25.4851	25.3206	25.2659	25.3932
A0A1U9X7A9;A0A1U9X7A6;A0A024RCR6;A0A0G2JK23;P46379;A0A0G2JL47;F6S6P2;X6REW1;A0A0G2JJM1;H0Y710;H0Y4L1;F6UR09;F6U1F2;F6XTU0;A0A0G2JJR8;A0A1B0GX79;F6WML8;F6VEM6;F6X9W3;F6U341;F6TC96	A0A1U9X7A9;A0A1U9X7A6;A0A024RCR6;A0A0G2JK23;P46379;A0A0G2JL47	Large proline-rich protein BAG6	BAT3;BAG6			21.6	118.65	0.0147984	0.999958	0.0171706	0.0446861	0.801458	0.601087	-0.670554	-1.73391	27.4267	28.0758	27.9944	28.2151	27.2001	28.1332	27.5204	27.2162	26.8001
A0A1U9X7Y0;A0A024RCS7;Q9BW19;B4DMA8;B4E063;A0A1U9X7X5	A0A1U9X7Y0;A0A024RCS7;Q9BW19;B4DMA8;B4E063;A0A1U9X7X5	Kinesin-like protein;Kinesin-like protein KIFC1	KIFC1			19.3	73.678	0.306138	0.880883	-0.0936273	-0.751494	0.300591	0.827838	-0.0821012	-0.739768	24.6331	24.6539	24.8755	24.7356	24.7134	24.4326	24.5477	24.6356	24.452
Q9HBM8;Q71VH6;A0A024RCV5;Q99943;B3KPH3;B4DRH1	Q9HBM8;Q71VH6;A0A024RCV5;Q99943;B3KPH3;B4DRH1	1-acyl-sn-glycerol-3-phosphate acyltransferase;1-acyl-sn-glycerol-3-phosphate acyltransferase alpha	AGPAT1			38	18.756	0.424993	0.811005	-0.25918	-0.995486	0.450919	0.762326	-0.975365	-1.04732	23.9604	24.6914	24.663	24.3022	23.9742	24.2608	24.4682	23.7422	21.4006
A2AAT0;B4DZZ8;B4DVK8;A0A1U9X8L9;A0A1U9X8K3;A0A1U9X8J5;A0A024RCX7;Q92504	A2AAT0;B4DZZ8;B4DVK8;A0A1U9X8L9;A0A1U9X8K3;A0A1U9X8J5;A0A024RCX7;Q92504	Zinc transporter SLC39A7	SLC39A7			5.9	24.003	0.290216	0.888361	0.0799421	0.717733	0.686001	0.647147	-0.179618	-1.50792	26.4451	26.1125	26.1875	26.4216	26.2976	26.2657	25.9555	26.157	26.3335
A0A024RCX8;Q9Y3C6	A0A024RCX8;Q9Y3C6	Peptidyl-prolyl cis-trans isomerase;Peptidyl-prolyl cis-trans isomerase-like 1	PPIL1			24.7	18.237	0.337691	0.862224	0.0497837	0.817528	0.325014	0.819619	0.0637449	0.791129	26.4606	26.4429	26.5431	26.5211	26.6278	26.447	26.539	26.7179	26.5302
A0A024RCY1;Q4VXZ2;Q8N1B4;A0A1U9X8S4;A0A024RCT2;B4DS44;B3KMF7;B4E225;B4DTZ4;Q7LA74;E9PI03;O60838;A0A0G2JIG2;B4DTP9	A0A024RCY1;Q4VXZ2;Q8N1B4;A0A1U9X8S4;A0A024RCT2;B4DS44;B3KMF7;B4E225;B4DTZ4	Vacuolar protein sorting-associated protein 52 homolog	VPS52			13.2	81.995	0.119203	0.950827	-0.0363261	-0.327134	0.358566	0.806049	0.126938	0.860652	26.0856	26.2322	26.1981	25.9345	26.2087	26.2637	26.3508	26.0502	26.3868
A0A220T1R7;A0A024RCZ1;Q8NC56;D6R958;H0Y9B7;H7C2Z0	A0A220T1R7;A0A024RCZ1;Q8NC56;D6R958;H0Y9B7;H7C2Z0	LEM domain-containing protein 2	LEMD2			6.7	41.172	0.121243	0.949054	0.054622	0.33221	0.765499	0.605221	-0.673962	-1.66326	23.4449	22.9418	23.3442	23.3185	23.1885	23.3878	22.0107	22.484	23.3783
A0A024RCZ8;Q9NSK0;H7C4M1;C9JZE5;C9J8T5	A0A024RCZ8;Q9NSK0	Kinesin light chain 4	KLC4			10.8	68.639	0.501587	0.78207	-0.38658	-1.14768	0.656263	0.656871	0.493139	1.44998	22.8909	22.7134	22.617	21.7835	22.3613	22.9167	22.7075	22.8103	23.0232
E9PFR3;A8K6Y2;A0A024RD11;Q14738;B4DSD7;Q59EF0;H0Y8C4;H7C5Q9;H0YJ49;H0YJ35	E9PFR3;A8K6Y2;A0A024RD11;Q14738;B4DSD7;Q59EF0;H0Y8C4	Serine/threonine-protein phosphatase 2A 56 kDa regulatory subunit delta isoform	PPP2R5D			30.3	69.116	0.848042	0.62918	-0.0962575	-1.82596	1.90067	0.36559	0.261474	4.30759	27.2327	27.259	27.2942	27.0883	27.1506	27.2582	27.4071	27.4953	27.3792
B2R6F9;A0A024RD18;Q15208;Q9UPD4;Q9UPD3	B2R6F9;A0A024RD18;Q15208	Serine/threonine-protein kinase 38	STK38			9.9	54.239	0.794429	0.644865	-0.118322	-1.72008	0.403062	0.788964	-0.196531	-0.951324	22.9996	23.1713	22.9859	22.8773	22.9287	22.9957	23.0108	22.8623	22.3391
A0A0A0MTI6;B4DSC2;B3KWH9;A0A024RD35;Q9NYP7	A0A0A0MTI6;B4DSC2;B3KWH9;A0A024RD35;Q9NYP7	Elongation of very long chain fatty acids protein;Elongation of very long chain fatty acids protein 5	ELOVL5			8.4	30.742	0.314553	0.87466	-0.0857849	-0.769213	0.38749	0.795623	-0.66659	-0.919769	25.0301	25.2383	25.365	25.204	25.15	25.0221	23.0145	25.232	25.1298
A0A024RD47;O75376;Q7Z516;A0A088AWL3;B4DJ25;Q9NSZ0;B4DZ48;E7EVK1;Q86YY1;Q3B773;Q6PGR4;Q6NTH1;Q6PDT8;E7EVU5;Q05CG3;E7EW50;J3KS51;Q86W52;A5PKW7	A0A024RD47;O75376;Q7Z516;A0A088AWL3;B4DJ25;Q9NSZ0;B4DZ48;E7EVK1	Nuclear receptor corepressor 1	NCOR1;DKFZp434M075			3.2	270.21	0.48064	0.791997	-1.30286	-1.10632	0.220975	0.866263	0.707991	0.566694	24.5443	24.3012	24.5497	24.3215	20.8127	24.3524	23.021	24.2605	24.3292
A0A024RD78;Q6P1L8	A0A024RD78;Q6P1L8	39S ribosomal protein L14, mitochondrial	MRPL14			44.1	15.947	0.590245	0.749466	-0.142158	-1.32136	1.44372	0.481251	0.271188	3.10636	24.9961	24.7811	24.7974	24.6441	24.8805	24.6235	25.0434	24.9689	24.9493
A0A024RD80;P08238;B4DMA2;B4DGL0;Q9H6X9;A8K3W9;Q6PK50;Q58FF7;O14942;Q58FF4	A0A024RD80;P08238;B4DMA2;B4DGL0	Heat shock protein HSP 90-beta	HSP90AB1			62.3	83.263	0.182282	0.920772	0.0502154	0.478565	0.642125	0.670206	0.0765216	1.42245	32.9379	32.6082	32.8194	32.7559	32.8808	32.8794	32.8681	32.8955	32.982
A0A2S1PH16;A0A2S1PH34;A0A2S1PH20;A0A024RD82;P22033;A0A0S2Z4X4;T1WHH0;A0A2S1PH13;A0A2S1PH23;A0A2S1PH31;B2R6K1;A0A2S1PH09;A0A2S1PH46;A0A0G3IFT0;S4UML7;S4UM43;Q59HB4	A0A2S1PH16;A0A2S1PH34;A0A2S1PH20;A0A024RD82;P22033;A0A0S2Z4X4;T1WHH0;A0A2S1PH13;A0A2S1PH23;A0A2S1PH31;B2R6K1;A0A2S1PH09;A0A2S1PH46	Methylmalonyl-CoA mutase, mitochondrial	MUT			14.2	83.004	0.86925	0.626056	-0.0982227	-1.86809	0.85009	0.593816	0.0907065	1.83002	26.2392	26.35	26.302	26.28	26.1419	26.1746	26.2844	26.3384	26.2457
A0A024RD93;P22234;E9PBS1;D6RF62;B4DGX3	A0A024RD93;P22234;E9PBS1;D6RF62;B4DGX3	Multifunctional protein ADE2;Phosphoribosylaminoimidazole-succinocarboxamide synthase;Phosphoribosylaminoimidazole carboxylase	PAICS			61.4	47.079	1.31647	0.516123	0.139059	2.8113	0.984026	0.557525	-0.0580476	-2.0992	30.2738	30.2071	30.3635	30.4474	30.3817	30.4324	30.3311	30.3589	30.3974
A0A024RDA1;A0A024RDA9;Q9NV70;A0PJ99	A0A024RDA1;A0A024RDA9;Q9NV70	Exocyst complex component 1	EXOC1			15.5	100.28	1.16916	0.53017	0.252937	2.48648	0.57952	0.688755	-0.100154	-1.30043	25.5338	25.2758	25.2584	25.5111	25.6669	25.6489	25.5778	25.5577	25.3909
A0A024RDB0;A0AVT1;B3KSS1;H0Y8S8;H0Y9U5	A0A024RDB0;A0AVT1;B3KSS1	Ubiquitin-like modifier-activating enzyme 6	UBE1L2;UBA6			42.9	117.97	1.60738	0.437493	0.081459	3.50893	0.244874	0.852467	0.0413857	0.619689	28.915	28.9296	28.9035	28.9751	29.0414	28.9759	28.9178	29.0686	29.1302
A8K6V7;A0A024RDB2;A0A024RDE5;Q9UN86;D6RGJ4;D6RAC7;D6RB17;D6R9X5;D6R9A4;D6RBM9;D6REX8;D6RBR0;D6RE13;D6RBW8	A8K6V7;A0A024RDB2;A0A024RDE5;Q9UN86	Ras GTPase-activating protein-binding protein 2	G3BP2			16.9	50.816	0.114703	0.954119	-0.0243975	-0.315885	0.187166	0.890645	0.0321477	0.489866	25.633	25.4133	25.651	25.5367	25.5626	25.5248	25.6992	25.4843	25.537
A0A024RDH6;A0A024RDD3;D6REX3;O94979;A0A1S5UZ19;H7BXG7;D6RHZ5;H0YAB3;H0Y9K1;H0Y8V7;H0Y8W8;H0Y9T9;H0YAF5;D6RE64;D6RCQ9;H0Y9V3;D6RBT0;D6RHE8	A0A024RDH6;A0A024RDD3;D6REX3;O94979;A0A1S5UZ19;H7BXG7;D6RHZ5;H0YAB3	Protein transport protein Sec31A	SEC31L1;SEC31A			31.8	129.03	0.0532577	0.981495	0.00934156	0.154645	1.0509	0.536609	0.0823752	2.23677	29.1888	29.1374	29.0253	29.0993	29.1984	29.0818	29.1972	29.2173	29.2121
B4DG59;B4DKC2;A0A024RDD7;Q7L099;D6REM9;D6RCQ1	B4DG59;B4DKC2;A0A024RDD7;Q7L099;D6REM9;D6RCQ1	Protein RUFY3	RUFY3			9.7	49.188	0.0716528	0.972429	0.0293852	0.204557	0.0376521	0.976076	-0.0661583	-0.111011	22.3419	22.5972	22.7327	22.5493	22.4587	22.7519	23.5132	22.5755	21.4729
A0A024RDE8;Q96HC4;Q4W5K9;H0Y8Y3;A0A0D9SFR4;A0A0A0MSP3;H0YBI4;H0Y929;Q9P1D1	A0A024RDE8;Q96HC4;Q4W5K9	PDZ and LIM domain protein 5	PDLIM5;LIM			49.5	63.974	1.03855	0.55047	0.145478	2.21118	0.295816	0.832191	0.0542806	0.729643	28.3786	28.1618	28.2552	28.4347	28.4257	28.3716	28.3328	28.4826	28.5794
A0A024RDF4;A0A024RDF3;Q14103;H0YA96;H0Y8G5;Q12771;B4DTC3;A0A024RDB4;D6RAF8;D6RF44;D6RBQ9;D6RD83;B4E0W4	A0A024RDF4;A0A024RDF3;Q14103;H0YA96;H0Y8G5;Q12771;B4DTC3;A0A024RDB4;D6RAF8;D6RF44;D6RBQ9	Heterogeneous nuclear ribonucleoprotein D0	HNRPD;HNRNPD			35	32.834	0.294649	0.884585	-0.0887426	-0.727165	0.617694	0.685709	0.158391	1.37486	29.19	29.0565	29.0109	28.7964	29.1737	29.0211	29.0926	29.2158	29.1579
A0A087WUK2;A0A024RDF6;O14979;B4DTA2;B4DGN3	A0A087WUK2;A0A024RDF6;O14979;B4DTA2	Heterogeneous nuclear ribonucleoprotein D-like	HNRNPDL;HNRPDL			39.1	40.04	1.31367	0.509103	0.352635	2.80496	0.297957	0.830134	0.11595	0.734186	28.1356	28.3366	28.2039	28.4642	28.8	28.4697	28.911	28.6356	28.5352
A0A024RDG1;O60763;REV__R4GMN2;REV__Q5VZ89	A0A024RDG1;O60763	General vesicular transport factor p115	VDP;USO1			33.1	107.89	0.139404	0.939619	0.0238978	0.37684	0.171794	0.900391	0.0471128	0.454113	27.9916	28.0341	28.1185	28.0933	27.9744	28.1482	27.9429	28.1735	28.2407
A0A1W2PPX5;A0A1W2PQR6;A0A1W2PQB7;A0A1W2PS43;A0A024RDG6;A0A1W2PRS1;Q14108;A0A1W2PRF6;A0A1W2PPU6;A0A1W2PSE4;A0A1W2PS70;A0A1W2PNX7	A0A1W2PPX5;A0A1W2PQR6;A0A1W2PQB7;A0A1W2PS43;A0A024RDG6;A0A1W2PRS1;Q14108;A0A1W2PRF6;A0A1W2PPU6	Lysosome membrane protein 2	SCARB2			20.1	49.204	1.82641	0.404211	0.421858	4.095	0.440191	0.766416	-0.144576	-1.02591	24.088	23.9414	24.1493	24.645	24.4182	24.3811	24.3055	24.1565	24.5486
A0A024RDG9;Q9BUT1;A8K5M0;A0A024RDJ8;D6RBF6;D6RFG2;D6R9P2;D6R9U8;D6RIR6;B3KY19	A0A024RDG9;Q9BUT1;A8K5M0;A0A024RDJ8	3-hydroxybutyrate dehydrogenase type 2	BDH2			26.9	26.724	0.85009	0.629645	2.08345	1.83002	0.068876	0.957789	0.0397981	0.197121	25.1186	22.9113	21.2265	24.8698	25.426	25.211	24.9978	25.213	25.4154
A0A024RDH8;P49207;Q5MK14	A0A024RDH8;P49207	60S ribosomal protein L34	RPL34			17.9	13.293	0.637827	0.711876	-0.305199	-1.41408	0.0190255	0.988899	0.0271861	0.0571886	28.9272	29.0017	28.764	28.9729	28.2742	28.5303	27.7964	28.8197	29.2427
A0A024RDI4;I6L894;A0A024RDK2;Q01484;D6RHE1;B7Z636;E9PHW9;A0A0U1RQN6;B7Z651;E9PCH6;B7Z2H4;Q7Z344;H0Y931;B7Z678;H0YAG3;H0Y8Y2	A0A024RDI4;I6L894;A0A024RDK2;Q01484;D6RHE1;B7Z636;E9PHW9;A0A0U1RQN6;B7Z651;E9PCH6;B7Z2H4	Ankyrin-2	ANK2			10.5	203.43	0.0408869	0.990369	0.0152747	0.12016	0.126038	0.923218	0.0579135	0.344094	26.2028	26.2106	26.4008	26.1838	26.5053	26.1709	26.1414	26.3116	26.5808
A0A024RDJ3;Q9NY12	A0A024RDJ3;Q9NY12	H/ACA ribonucleoprotein complex subunit 1	NOLA1;GAR1			19.8	22.348	0.0955924	0.966176	-0.0369555	-0.267333	0.342419	0.812051	-0.171453	-0.827331	25.226	25.3943	25.2782	25.5062	25.0673	25.2141	25.4144	24.9065	24.9523
D6R938;A0A024RDK3;E9PBG7;E9PF82;B7Z2B0;Q13557;Q4G1A8;H0Y9J2;Q92991;E9PBE8;E7EQE4;Q8IWE0;Q7LDD5;A8K161;Q9UQM7;D6RHX9;D6RFJ0;Q75LA8;E7ERS6;E7ETC9;H0Y9C2	D6R938;A0A024RDK3;E9PBG7;E9PF82;B7Z2B0;Q13557;Q4G1A8	Calcium/calmodulin-dependent protein kinase type II subunit delta	CAMK2D			15.7	56.298	0.475181	0.794312	0.110161	1.09551	0.841845	0.600879	-0.28334	-1.81367	25.4658	25.4088	25.586	25.6967	25.426	25.6684	25.5679	25.2377	25.1355
A0A024RDK4;Q96CB8;A0A087WXN4	A0A024RDK4;Q96CB8;A0A087WXN4	Integrator complex subunit 12	INTS12			9.7	48.807	0.162095	0.932839	0.265267	0.431264	0.369496	0.80532	0.498878	0.883074	22.2182	22.8053	23.0856	21.8517	23.4643	23.589	23.5603	23.3116	23.5296
Q59ET3;A0A024RDL1;P40227;B2R9K8;B4DPJ8;A1JUI8;B4DN39;J3KRI6	Q59ET3;A0A024RDL1;P40227;B2R9K8;B4DPJ8;A1JUI8;B4DN39	T-complex protein 1 subunit zeta	CCT6A			55.8	57.761	0.00146285	0.999964	0.000296911	0.00448359	0.18022	0.893389	-0.0466003	-0.47378	30.8753	30.9282	31.032	30.9965	30.8504	30.9895	30.7353	30.9341	31.0272
C9JBI3;A0A024RDL3;A0A024RDL9;P78330;Q53EY1	C9JBI3;A0A024RDL3;A0A024RDL9;P78330;Q53EY1	Phosphoserine phosphatase	PSPH			26.2	20.745	0.408898	0.822492	-0.457614	-0.963106	1.07038	0.53105	1.07918	2.27729	23.599	23.4898	23.0988	22.1822	23.7399	22.8927	24.2982	23.9577	23.7965
B4DLG0;A0A2R8Y568;A0A024RDL5;A0A2R8Y522;A0A087WVB5;Q75MD7;A0A2R8Y8C6;Q8WXX7;H7C2P0;H7C090	B4DLG0;A0A2R8Y568;A0A024RDL5;A0A2R8Y522;A0A087WVB5;Q75MD7;A0A2R8Y8C6;Q8WXX7	Autism susceptibility gene 2 protein	AUTS2			5.8	79.344	0.50236	0.781809	-0.504405	-1.1492	0.124451	0.924311	0.177726	0.340167	22.9154	23.6024	23.348	22.9618	22.0369	23.3539	23.6343	22.7757	22.4757
A0A024RDL8;P04424;A0A0S2Z3B0;A0A0S2Z316;Q6XYD2;B4DU69;F8W943;H7C0S8	A0A024RDL8;P04424;A0A0S2Z3B0;A0A0S2Z316	Argininosuccinate lyase	ASL			22.2	51.657	0.00995489	0.996893	0.00427564	0.0302208	0.409713	0.785267	0.127546	0.96475	25.8766	25.7865	25.4661	25.7722	25.7896	25.5803	25.6166	25.9226	25.9854
Q53HK8;A0A024RDQ8;P40938;B4DKE6;Q5U0C2;A0A087X270	Q53HK8;A0A024RDQ8;P40938;B4DKE6;Q5U0C2	Replication factor C subunit 3	RFC3			27.2	40.486	0.325349	0.870796	-0.132186	-0.791829	0.563028	0.691573	-0.239713	-1.26822	26.5915	26.5556	26.5366	26.6648	26.1083	26.514	26.1587	26.0509	26.3585
Q5T7C4;B7Z965;Q59GW1;A0A024RDR0;P09429;A0A286R9D9;B2RPK0;B3KQ05;D3DQY9;Q75MM1;A0A286R9F1;Q9NYD7	Q5T7C4;B7Z965;Q59GW1;A0A024RDR0;P09429;A0A286R9D9;B2RPK0;B3KQ05;D3DQY9	High mobility group protein B1;Putative high mobility group protein B1-like 1	HMGB1;HMGB1P1;hCG_1991922			58.2	18.311	0.692524	0.682597	0.395573	1.52064	0.637064	0.670601	0.394747	1.41259	28.4502	28.1856	28.3468	28.3036	29.1636	28.7021	28.8631	29.2255	29.2648
A0A024RDS1;Q92598;A0A024RDQ0;B4DF68;A0A0A0MSM0;B4DY72;B4DZB4;Q5TBM3;R4GN69;B4DZP3	A0A024RDS1;Q92598;A0A024RDQ0;B4DF68;A0A0A0MSM0;B4DY72;B4DZB4	Heat shock protein 105 kDa	HSPH1			62.9	96.864	0.672159	0.695155	0.129706	1.48095	0.955799	0.572628	0.145198	2.04183	29.8627	29.6458	29.7406	29.783	29.9925	29.8626	29.956	30.0375	30.0803
A0A024RDS3;Q9UBW7;A8K126;A0A087X151;B4DZH0	A0A024RDS3;Q9UBW7;A8K126	Zinc finger MYM-type protein 2	ZNF198;ZMYM2			17.8	154.91	1.16873	0.527135	-0.135832	-2.48556	1.07326	0.52992	0.157345	2.28331	26.8963	26.9435	26.8597	26.807	26.8187	26.6663	26.8459	27.0118	26.9063
A0A024RDV5;A0A024RDT9;Q9Y2H6;G5E9X3;A0A087X1M6;H7C507	A0A024RDV5;A0A024RDT9;Q9Y2H6;G5E9X3	Fibronectin type-III domain-containing protein 3A	FNDC3A			10.2	125.82	0.0603119	0.977262	-0.0212224	-0.173971	0.0945382	0.943272	0.0308272	0.264616	24.7258	24.866	24.8742	25.0244	24.6754	24.7026	24.7988	24.8951	24.8009
A0A024RDU0;Q9UL03;C9JVX2;B4DL13;B4E2C8;G5E9X1;B3KQH5;C9JXP6;C9J885;C9K0V7;F8WAV7;B4E1J5;B9EIK3;A0A1W2PPI5;Q5JSJ4	A0A024RDU0;Q9UL03;C9JVX2;B4DL13;B4E2C8;G5E9X1;B3KQH5	Integrator complex subunit 6	INTS6			11.2	100.39	0.414907	0.815408	-0.20373	-0.975215	0.461129	0.75871	-0.332979	-1.06763	23.9297	23.638	24.2281	23.8386	23.4866	23.8594	23.5015	23.8314	22.8527
B4DTN0;A0A3B3IS71;A0A024RDV3;P06400;Q59HH0;B4DRB3;Q6LE65;A0A385FS41;A0A385FS25;A0A385FS12;A0A0X9QC09;Q6LE79;A0A385FS33;V9H020;P78495;Q6LE82;A0A2R8YFL6;A0A2R8Y743	B4DTN0;A0A3B3IS71;A0A024RDV3;P06400;Q59HH0;B4DRB3	Retinoblastoma-associated protein	RB1			20.8	104.15	0.0153993	1	0.00366974	0.0464702	0.695769	0.643509	-0.211097	-1.52696	26.6742	26.7339	26.6324	26.7749	26.7378	26.5389	26.3229	26.7038	26.3915
A0A024RDV7;O00505;Q53F09;H0Y4S9	A0A024RDV7;O00505;Q53F09	Importin subunit alpha;Importin subunit alpha-4	KPNA3			24.6	57.81	0.029542	0.994898	0.0116539	0.0878222	1.85394	0.380627	0.178763	4.17295	26.8347	26.3819	26.5962	26.6031	26.6598	26.5849	26.8673	26.7526	26.7642
B4DXT5;B3KML8;A8K6Q9;A0A024RDV9;Q8N0X7;B3KMI3	B4DXT5;B3KML8;A8K6Q9;A0A024RDV9;Q8N0X7;B3KMI3	Spartin	SPG20			6.3	39.495	0.262507	0.900365	0.0542119	0.658178	0.330385	0.816445	-0.218944	-0.802334	23.4311	23.3347	23.2816	23.3211	23.3468	23.5422	22.6635	23.3724	23.5174
B4E2D5;R4GND2;B3KNI1;A8K8L1;A0A024RDW2;Q0D2Q4;F6S7C4;Q8NEM7;H7C5F9	B4E2D5;R4GND2;B3KNI1;A8K8L1;A0A024RDW2;Q0D2Q4;F6S7C4;Q8NEM7;H7C5F9	Transcription factor SPT20 homolog	SUPT20H;FAM48A			5.8	56.056	0.53306	0.767705	-0.231733	-1.20955	0.622588	0.681189	-0.364699	-1.3844	22.4051	23.0147	22.5335	22.5147	22.3684	22.3751	21.5365	22.3085	22.319
A0A024RDY0;O00410;H0Y8C6;B4E0R6;B3KWG6;E7ETV3;E7EV12;E7EQT5;Q9BVS9;E7EWK4;E7EX05;H0Y3V4;C9J875;C9JQT6;C9JZD8;E7ETV8;E7ESZ1;C9JXE0;C9J583;C9JZ53;F8WF30;B4E340	A0A024RDY0;O00410;H0Y8C6;B4E0R6;B3KWG6	Importin-5	RANBP5;IPO5			54.3	123.63	2.63651	0.338	0.124723	6.9033	3.20867	0.153714	0.118982	9.75546	30.1155	30.1666	30.1311	30.2454	30.2795	30.2625	30.3674	30.3912	30.3857
A0A024RDY9;B1ALK7;B7Z6G2;A0A2R8YG42;A0A2X0SF98;Q14155;E7EUY6;E9PDQ5;Q5W9H1;B7Z344;E7EU80;B7Z3C7;A0A2X0SSH0;Q15052;C9JDI6;B1ANY6;Q5ZEZ3;E7ENL8;Q8N4Q3;C9JAD7;F6SJA5;B7Z6D9;B7Z667	A0A024RDY9;B1ALK7;B7Z6G2;A0A2R8YG42;A0A2X0SF98;Q14155;E7EUY6;E9PDQ5;Q5W9H1;B7Z344	Rho guanine nucleotide exchange factor 7	ARHGEF7;KIAA0142			27.2	73.139	0.324925	0.870385	-0.0752843	-0.790941	0.458293	0.757765	0.0961177	1.062	26.5074	26.6488	26.6933	26.4185	26.5221	26.683	26.5578	26.6316	26.7226
B2RCW0;A0A024RDZ2;Q13042;Q5T8C6;A0A3B3ISD2;B4DK74;Q59EG1	B2RCW0;A0A024RDZ2;Q13042;Q5T8C6;A0A3B3ISD2	Cell division cycle protein 16 homolog	CDC16			17.8	71.454	1.10726	0.533046	-0.24782	-2.35466	0.0631221	0.960542	0.0227731	0.181604	26.0716	26.3495	26.1762	26.0758	25.8454	25.9326	25.8374	25.9023	26.1825
A0A024RDZ9;A8K097;A0A024RE04;Q5JVF3	A0A024RDZ9;A8K097;A0A024RE04;Q5JVF3	PCI domain-containing protein 2	RP11-98F14.6;PCID2			24.7	33.783	0.172734	0.927064	-0.0837682	-0.456316	0.0143346	0.991193	-0.011116	-0.0433074	25.525	25.4995	25.1487	25.294	25.0757	25.5522	24.9278	25.2829	25.6778
X6R5E5;A8K2S7;A0A024RE02;Q8NBM4;B7Z6T7;B3KW74	X6R5E5;A8K2S7;A0A024RE02;Q8NBM4;B7Z6T7;B3KW74	Ubiquitin-associated domain-containing protein 2	UBAC2;PHGDHL1			38.2	23.074	0.0697865	0.972705	-0.0283044	-0.199563	0.85002	0.593071	-0.392656	-1.82988	25.8719	26.2769	25.8363	25.9437	25.9715	25.9849	25.9298	25.603	25.1894
A0A024RE13;Q9NRR4;Q59FF9	A0A024RE13;Q9NRR4;Q59FF9	Ribonuclease 3	RNASEN;DROSHA			4.4	156.34	0.509369	0.783591	1.13499	1.16301	0.460618	0.756811	-0.7634	-1.06662	21.4167	24.2947	24.3447	24.6593	24.5599	24.2419	24.5798	24.2648	22.3263
Q4GG69;T1Q5L1;Q9B300;Q7Y7B0;Q4GI58;D4IH26;B2XIN0;A0A3Q8A6A9;A0A343HSK4;A0A1V0MBT6;A0A141ZQX9;A0A0E3X973;A0A097QEL5;A0A059QP87;B9ECT5;A0A343GTV4;A0A141ZSL4;A0A141ZQA8;A0A3Q8UG56;A0A343R0I3;Q1ZY32;A0A343LEV6;X5CDJ3;X5BLB3;V9N9T2;V9N518;V9JFH6;V9J5G3;V9J548;V9J0Z6;V9IZQ9;V5JGF7;U5ZDA5;U5ZC24;U5YXJ5;U5YT86;U3LDR4;U3LCU1;U3L9L1;U3L8Y8;U3L8P3;U3L6U8;U3L6N6;U3L6H7;T2HMQ7;T1Q5T0;T1Q5B1;T1Q517;S5RPJ8;S4UQ…	Q4GG69;T1Q5L1;Q9B300;Q7Y7B0;Q4GI58;D4IH26;B2XIN0;A0A3Q8A6A9;A0A343HSK4;A0A1V0MBT6;A0A141ZQX9;A0A0E3X973;A0A097QEL5;A0A059QP87;B9ECT5;A0A343GTV4;A0A141ZSL4;A0A141ZQA8;A0A3Q8UG56;A0A343R0I3;Q1ZY32;A0A343LEV6;X5CDJ3;X5BLB3;V9N9T2;V9N518;V9JFH6;V9J5G3;V9J548;V9J0Z6;V9IZQ9;V5JGF7;U5ZDA5;U5ZC24;U5YXJ5;U5YT86;U3LDR4;U3LCU1;U3L9L1;U3L8Y8;U3L8P3;U3L6U8;U3L6N6;U3L6H7;T2HMQ7;T1Q5T0;T1Q5B1;T1Q517;S5RPJ8;S4UQ…	NADH-ubiquinone oxidoreductase chain 4	NADH4;ND4;nd4;ndh4;MT-ND4			14.6	51.52	0.358005	0.854184	0.138921	0.859499	0.587643	0.687056	-1.29142	-1.31628	25.6122	25.7366	25.8296	26.1304	25.8494	25.6154	22.6392	25.6621	25.4196
A0A067XG54;Q8NB49;H7C0E8;Q659C3;H0Y8F0;B4DKX1;B3KSJ2;B4E3T1;H7C4W6;Q9Y2G3	A0A067XG54;Q8NB49	Phospholipid-transporting ATPase;Phospholipid-transporting ATPase IG	ATP11C			6.6	127.68	0.279576	0.896324	-0.34728	-0.69499	0.229905	0.861128	-0.400339	-0.586613	23.7167	23.423	23.556	23.9865	23.3671	22.3004	22.9018	23.5907	21.9604
A0A0G2JNZ5;B7Z7G9;B2R6A7;A0A0G2JLB3;A0A068F658;B7Z6S9;P04062;A0A068FB60;B7Z6E6;A0A223PQI4;D3DV87;B7Z731;A0A068F579;A0A0G2JNZ0;A0A068F4C8;A0A068F753;A0A068F661;B3KQW3;B4DHT6;B4DMV8	A0A0G2JNZ5;B7Z7G9;B2R6A7;A0A0G2JLB3;A0A068F658;B7Z6S9;P04062;A0A068FB60;B7Z6E6;A0A223PQI4;D3DV87;B7Z731;A0A068F579;A0A0G2JNZ0;A0A068F4C8;A0A068F753	Glucosylceramidase	GBA			24.9	50.263	0.865541	0.626495	0.259356	1.86071	0.984295	0.558709	0.296899	2.09975	24.5812	24.9151	24.5378	25.0803	24.8471	24.8847	25.3343	24.9924	25.3761
A0A068F7M9;Q9Y613;B4DVN5;B4E2D9;J3KTH7	A0A068F7M9;Q9Y613;B4DVN5	FH1/FH2 domain-containing protein 1	FHOD1			20.2	129.31	0.0898528	0.969878	-0.0244312	-0.25249	0.70329	0.639986	-0.162832	-1.54163	26.3547	26.5615	26.6	26.3716	26.4943	26.577	26.4914	26.248	26.215
A0A075B6F6;A0A0S2Z6F0;A0A3B3IT72;A0A0S2Z5V7;A0A3B3IUB5;Q8TCT9;A0A0C4DGU3	A0A075B6F6;A0A0S2Z6F0;A0A3B3IT72;A0A0S2Z5V7;A0A3B3IUB5;Q8TCT9	Minor histocompatibility antigen H13	HM13			10.7	30.162	1.68282	0.432325	0.0758343	3.70427	0.216368	0.868737	0.0259501	0.556358	26.3072	26.321	26.2693	26.4018	26.3628	26.3605	26.3404	26.3743	26.4881
M0R3B2;A8K670;A0A075B6F9;Q9Y314;M0R1T7;M0QX85;B4DUN3;M0R1K2;A0A075B797	M0R3B2;A8K670;A0A075B6F9;Q9Y314;M0R1T7;M0QX85;B4DUN3;M0R1K2;A0A075B797	Nitric oxide synthase-interacting protein	NOSIP			11.6	26.804	0.560321	0.752365	0.122295	1.26293	0.601508	0.685801	0.146451	1.34332	23.6078	23.5743	23.577	23.5231	23.8458	23.7572	23.9569	23.8148	23.7937
B4DDU0;B7Z3G4;A0A075B7B5;A0A1S5UZH8;Q5VZB5;B7ZM87;O75044;E9PDX4;A0A087X0L1;Q5VZB4;P0DJJ0;A0A075B743;A0A087WW56;A0A286YEY3;G5EA48;A0A2X0SFI2;P0DMP2;Q7Z6B7	B4DDU0;B7Z3G4;A0A075B7B5;A0A1S5UZH8;Q5VZB5;B7ZM87;O75044;E9PDX4;A0A087X0L1;Q5VZB4;P0DJJ0	SLIT-ROBO Rho GTPase-activating protein 2;SLIT-ROBO Rho GTPase-activating protein 2C	SRGAP2;SRGAP2C			9.1	72.91	0.216092	0.906341	-0.449146	-0.55574	0.185357	0.892685	0.410603	0.485687	23.9933	24.0537	24.1472	24.3397	24.5026	22.0044	24.4062	24.1231	23.5493
B4E312;A0A075B7D9;Q92804	B4E312;A0A075B7D9;Q92804	TATA-binding protein-associated factor 2N	TAF15			19.2	40.078	1.00771	0.557581	2.12599	2.14765	0.60687	0.682984	-0.932495	-1.35377	24.9482	22.7709	21.5695	25.1949	25.3129	25.1588	22.9185	25.057	24.8937
A0A087WT20;Q9NV06;B3KME9;E5RHM4;A0A087X1F8	A0A087WT20;Q9NV06;B3KME9	DDB1- and CUL4-associated factor 13	DCAF13			14.6	67.55	0.750132	0.659362	-0.140689	-1.63316	0.463406	0.757521	-0.115175	-1.07216	26.1377	26.2115	26.0367	25.8574	26.011	26.0954	25.9546	25.7092	25.9545
A0A087WT45;A8K7Z3;Q4V328;A0A075B793;A0A087WXA6;A0A087WW92;A0A087WZF5	A0A087WT45;A8K7Z3;Q4V328;A0A075B793	GRIP1-associated protein 1	GRIPAP1			21.4	90.856	0.950791	0.586509	0.221819	2.03169	0.540226	0.707749	-0.150203	-1.2236	25.865	25.833	25.7478	25.8463	26.0633	26.2016	26.019	25.8258	25.8158
E9KL42;B4DV16;A1L172;A0A087X0W7;A0A087WT95;Q86TX2;P49753;G3V4F2;B7ZMC1;B3KSA0;A0A2R8Y7H3	E9KL42;B4DV16;A1L172;A0A087X0W7;A0A087WT95;Q86TX2;P49753;G3V4F2;B7ZMC1;B3KSA0	Acyl-coenzyme A thioesterase 1;Acyl-coenzyme A thioesterase 2, mitochondrial	ACOT1;ACOT2			14.5	46.277	0.485253	0.792123	-0.116184	-1.11544	0.103894	0.937655	0.0278823	0.288584	25.4032	25.1835	25.2942	25.2491	25.0127	25.2706	25.1794	25.1345	25.3021
A0A087WTA5;E7ERK9;Q9UI10;Q71US4;Q9Y3W7;A0A087WW69;Q9HBP7;B4DUP5;Q59FC8;F8W8L6;H7C2L8	A0A087WTA5;E7ERK9;Q9UI10;Q71US4;Q9Y3W7;A0A087WW69;Q9HBP7;B4DUP5	Translation initiation factor eIF-2B subunit delta	EIF2B4;DKFZp586J0119			26	57.495	0.249608	0.901501	-0.0921758	-0.63007	0.995901	0.554275	0.286317	2.12346	24.774	25.14	24.8626	25.0171	24.6921	24.7909	25.2635	24.9416	25.154
A0A087WTF6;A0A087WX77;A0A087WWD4;A0A087WV75;P13591;H7BYX6;A0A087WTE4;A0A0D9SF98;A0A087WWJ5;B4DSQ7;A0A087WVU1;A0A087WZS4;B7Z8D6;A0A087X1V2;O00557;A0A087WTR3;A0A0C4DGS4;A0A0D9SF30	A0A087WTF6;A0A087WX77;A0A087WWD4;A0A087WV75;P13591;H7BYX6;A0A087WTE4;A0A0D9SF98;A0A087WWJ5	Neural cell adhesion molecule 1	NCAM1			17.5	93.329	0.67107	0.695317	0.26551	1.47883	0.475946	0.749611	-0.195181	-1.09703	25.1943	24.8023	25.2259	25.1067	25.4741	25.4383	24.9147	25.3791	25.1398
B7Z4P1;Q6ZQU6;F5H5N1;B7Z1U1;A8K0V6;Q8NAS7;Q7LD69;Q9H3K5;A0A087WXF6;A0A087WTI3;F5GXJ1;O75251;Q6ZS38	B7Z4P1;Q6ZQU6;F5H5N1;B7Z1U1;A8K0V6;Q8NAS7;Q7LD69;Q9H3K5;A0A087WXF6;A0A087WTI3;F5GXJ1;O75251	NADH dehydrogenase [ubiquinone] iron-sulfur protein 7, mitochondrial	NDUFS7			20.3	15.763	0.497348	0.782913	0.222844	1.13932	0.274034	0.84217	-0.141081	-0.683083	25.1661	25.4794	25.243	25.8101	25.5301	25.2167	25.5961	25.3332	25.2044
A0A087WTV6;A0A0S2Z5U6;Q96C36;J3KR12;A0A024R3Q9;B4DQK8;B3KMB7;Q4W8W1;A0A087WZR9;A0A0S2Z578;Q8NCZ0;A0A087WX69;A0A087WZF0	A0A087WTV6;A0A0S2Z5U6;Q96C36;J3KR12;A0A024R3Q9;B4DQK8;B3KMB7;Q4W8W1;A0A087WZR9	Pyrroline-5-carboxylate reductase 2;Pyrroline-5-carboxylate reductase	PYCR2;P5CR2			41.9	25.868	0.0140075	1	0.00173696	0.0423343	0.00665819	0.995777	-0.00543404	-0.0202872	26.2193	26.3133	26.3159	26.3079	26.3131	26.2328	25.7957	26.3263	26.7155
A0A087WVR3;A0A087WTW0;Q96T88;B4E0F9;A0A087WWG9	A0A087WVR3;A0A087WTW0;Q96T88	E3 ubiquitin-protein ligase UHRF1	UHRF1			23.1	91.099	0.0351431	0.990241	0.0154845	0.103876	0.702501	0.640368	-0.31095	-1.54009	25.9472	26.3591	26.3077	26.0737	26.2803	26.3066	25.5441	26.0141	26.1695
B4DH58;A0A087WU53;Q9H0U3;A8MUP5;Q96SP2	B4DH58;A0A087WU53;Q9H0U3;A8MUP5	Magnesium transporter protein 1	MAGT1			13.1	41.459	0.802422	0.642191	-0.189978	-1.73581	0.00855927	0.994429	0.00203069	0.0260243	25.3999	25.6961	25.6827	25.4422	25.3009	25.4657	25.5053	25.4073	25.3022
A0A0G2JMS5;A0A087WU62;A0A087X2D5;B4DEF8;Q9BRJ2;Q3MHC5	A0A0G2JMS5;A0A087WU62;A0A087X2D5;B4DEF8;Q9BRJ2	39S ribosomal protein L45, mitochondrial	MRPL45			26.2	29.408	0.0476142	0.986317	-0.0288868	-0.13901	0.214509	0.870277	-0.0713641	-0.552178	24.9406	24.2904	24.4289	24.651	24.4766	24.4456	24.3721	24.312	24.675
A0A087WUB9;Q8WYA6;A2A2P1	A0A087WUB9;Q8WYA6	Beta-catenin-like protein 1	CTNNBL1			15.5	65.702	0.631558	0.717801	-0.255799	-1.40187	0.521208	0.715097	0.100773	1.18629	26.1943	25.6896	25.6563	25.7003	25.542	25.5305	25.6476	25.6079	25.8195
E9PL01;B4DDB9;A0A087WUC6;E9PI68;Q15005;E9PRB9;H0YE04	E9PL01;B4DDB9;A0A087WUC6;E9PI68;Q15005	Signal peptidase complex subunit 2	SPCS2			34.4	17.027	1.61769	0.447176	0.680055	3.53526	1.1946	0.525104	0.299435	2.54141	24.8303	25.3075	25.3442	25.7128	26.0333	25.7761	26.2102	26.0095	26.2008
A0A087WUN7;H0YJ40;G3V4X6;G3V2S9;Q9GZT3;H0YJW7;H0YJI1;H0YJ07;H0YJU7	A0A087WUN7;H0YJ40;G3V4X6;G3V2S9;Q9GZT3;H0YJW7	SRA stem-loop-interacting RNA-binding protein, mitochondrial	SLIRP			39.1	10.353	0.157274	0.935854	-0.0956599	-0.419817	0.605826	0.683649	-0.882422	-1.35174	25.0433	25.4109	25.7124	25.4458	25.3781	25.0556	23.1275	25.0531	25.0516
E7ETK0;A0A2R8Y849;A0A087WUS0;A0A2R8YD14;P62847;A0A2R8Y8A0	E7ETK0;A0A2R8Y849;A0A087WUS0;A0A2R8YD14;P62847	40S ribosomal protein S24	RPS24			26	15.197	0.451795	0.804121	-1.07806	-1.04906	0.347313	0.810456	0.864366	0.837458	25.4228	25.1549	25.1771	22.1267	25.135	25.2589	24.8027	25.064	25.247
Q8N5A0;A0A087WUT6;O60841;B3KM86;D3DVI5;Q05CQ1;A0JLR8	Q8N5A0;A0A087WUT6;O60841;B3KM86;D3DVI5	Eukaryotic translation initiation factor 5B	EIF5B			19.8	138.8	0.31	0.878564	0.0589294	0.759637	0.481008	0.745988	-0.0836709	-1.10705	27.6921	27.4677	27.5131	27.5731	27.5877	27.6889	27.6149	27.4018	27.582
D3DWY0;A0A087X0G7;A0A087WUW6;A0A087X1B1;Q9Y6K9;A0A087WV30;D3DWY2;C9JN51	D3DWY0;A0A087X0G7;A0A087WUW6;A0A087X1B1;Q9Y6K9;A0A087WV30;D3DWY2;C9JN51	NF-kappa-B essential modulator	IKBKG			7.4	32.514	0.0129498	0.998628	-0.0198803	-0.039183	0.307505	0.823441	-0.377114	-0.754377	23.0316	23.4838	23.2562	22.3665	24.0631	23.2823	22.9538	22.9617	22.6651
A0A087WVM4;B7ZM99;Q6UB35;B2RD24;H0Y327;Q4VXM0;Q5JYA8;Q5JYA3;Q8WX68	A0A087WVM4;B7ZM99;Q6UB35;B2RD24	Monofunctional C1-tetrahydrofolate synthase, mitochondrial	MTHFD1L			16.4	99.31	0.482224	0.791947	-0.115847	-1.10945	0.175192	0.89699	0.026982	0.462065	28.205	27.9552	27.9016	27.9755	27.8171	27.9216	27.9468	27.8644	27.9839
A0A087WVQ6;Q00610;J3KS13;A0A087WX41;P53675;K7EJJ5;J3KRF5;J3KSQ2;J3QL20;A4FU99;Q9H3B0;F5H5N6	A0A087WVQ6;Q00610	Clathrin heavy chain;Clathrin heavy chain 1	CLTC			61.8	192.06	2.57821	0.290333	-0.669339	-6.65939	1.15422	0.524671	0.278361	2.45443	32.7171	32.9716	32.874	32.3151	32.153	32.0866	32.2852	32.5836	32.521
A0A087WW06;Q96AY4	A0A087WW06;Q96AY4	Tetratricopeptide repeat protein 28	TTC28			7.5	256.86	0.00550064	0.999283	-0.0019385	-0.0167821	0.396017	0.79515	-0.192031	-0.93707	24.9739	25.1533	24.977	25.1461	24.8352	25.1171	24.4858	24.9736	25.0629
A0A087WW59;Q7Z7L8	A0A087WW59;Q7Z7L8	Uncharacterized protein C11orf96	C11orf96			44.3	13.773	0.497275	0.781294	-0.120354	-1.13918	1.93181	0.354486	0.665726	4.39903	24.3391	24.3612	24.1497	24.3184	24.0423	24.1283	24.606	25.0475	24.8326
A0A087WW77;Q15334;A0PJG1	A0A087WW77;Q15334	Lethal(2) giant larvae protein homolog 1	LLGL1			15.6	114.43	0.245585	0.906613	-0.0914981	-0.62125	0.0773205	0.95399	0.0344124	0.219631	25.2625	25.3785	25.1934	25.2231	24.9331	25.4036	25.2752	25.071	25.3169
F8W8R3;A0A087WWF6;P49005;B4DP28;C9IZD2;C9J8Z7;C9JLE1;C9JHC7;H7C1B3	F8W8R3;A0A087WWF6;P49005;B4DP28;C9IZD2;C9J8Z7;C9JLE1;C9JHC7	DNA polymerase delta subunit 2	POLD2			14.1	49.612	0.773059	0.646702	0.0896893	1.67809	0.199328	0.88219	-0.0340481	-0.517775	25.0587	24.9996	24.9221	25.0565	25.0386	25.1543	25.0999	24.9391	25.1083
A0A087WWM0;O43617;A0A087WYS5;A6NKE1	A0A087WWM0;O43617;A0A087WYS5	Trafficking protein particle complex subunit 3	TRAPPC3			17	21.231	0.244624	0.904704	-0.100107	-0.61914	0.571619	0.689514	0.211577	1.285	23.7937	23.7388	23.4429	23.3456	23.5707	23.7589	23.5987	23.9841	23.7271
H0YMB3;H0YLV5;A0A087WWM4;F8WAN9;Q6PKC0;H0YNJ6;Q9P2T1;H0YLB8;Q86SZ5;Q7Z527;H0YNS9;H0YK13;H0YK71;H0YNH0;H0YL68;H0YKE1;H0YMR9;H0YMV5	H0YMB3;H0YLV5;A0A087WWM4;F8WAN9;Q6PKC0;H0YNJ6;Q9P2T1;H0YLB8;Q86SZ5;Q7Z527;H0YNS9	GMP reductase;GMP reductase 2	GMPR2			18.7	33.921	0.505642	0.785514	-0.13522	-1.15567	0.131247	0.920659	-0.0358512	-0.356921	24.899	25.1256	25.0755	25.0296	24.7143	24.9505	24.7982	24.8774	24.9113
A0A499FJY3;A0A087WWP4;Q96T37;A0A494C001;Q59EY1;Q0VA89;Q13722	A0A499FJY3;A0A087WWP4;Q96T37;A0A494C001	Putative RNA-binding protein 15	RBM15			29.4	101.31	0.414523	0.816262	-0.0665029	-0.974443	0.107431	0.935487	0.0308444	0.297562	27.415	27.3629	27.3312	27.4233	27.2063	27.2799	27.2974	27.2144	27.4904
A0A0C4DGT8;A0A087WWP8;Q5VWQ0;A0A0C4DH79	A0A0C4DGT8;A0A087WWP8;Q5VWQ0	Round spermatid basic protein 1	RSBN1			19	77.319	0.298231	0.882687	-0.0895214	-0.734768	0.743574	0.615516	-0.195979	-1.62032	25.5102	25.4545	25.4795	25.6221	25.2136	25.3399	25.1847	25.1953	25.2077
A0A087WWS1;Q96FV9;R4GMN4;J3KT14;J3KRD7;J3QQZ3;A0A087WY84	A0A087WWS1;Q96FV9;R4GMN4	THO complex subunit 1	THOC1			18.3	75.651	0.155365	0.936011	0.0910886	0.415268	0.158444	0.90657	0.0579656	0.422602	25.1224	25.1204	24.6036	25.1592	25.1907	24.7698	25.1402	25.0878	25.0655
Q53FX3;A0A087WXL6;Q9H270;B7Z879;Q658K0;B3KPS8;A0A0G2JS92;A0A087X2J4	Q53FX3;A0A087WXL6;Q9H270;B7Z879;Q658K0	Vacuolar protein sorting-associated protein 11 homolog	VPS11;DKFZp564P2364			13.2	107.77	0.470877	0.793515	0.102797	1.08698	0.390937	0.79426	0.0823097	0.926769	24.7784	24.825	25.0316	25.0154	25.0522	24.8758	25.166	25.0966	24.9278
A0A499FIX8;H7BXI1;A0A087WXU3;A0FGR8	A0A499FIX8;H7BXI1;A0A087WXU3;A0FGR8	Extended synaptotagmin-2	ESYT2			21.3	93.977	0.079549	0.971196	-0.0155958	-0.225521	0.400936	0.790774	0.0672073	0.947027	25.4324	25.6194	25.5505	25.4342	25.552	25.5694	25.5441	25.5149	25.6982
A0A087WY55;Q9NP79;Q9C063;Q5TGM0	A0A087WY55;Q9NP79;Q9C063;Q5TGM0	Vacuolar protein sorting-associated protein VTA1 homolog	VTA1			30	31.102	1.9933	0.376	0.305074	4.58365	0.796646	0.60202	-0.134394	-1.72444	26.2729	26.3785	26.4296	26.5732	26.6886	26.7344	26.4783	26.6535	26.4613
A0A087WY71;Q96CW1;B4E304;E9PFW3;B4DNB9;B4DJB1;B4DFM1;B4DTI4;B7Z4N2;C9JJ47;H7C4C3;C9JGT8;C9JJD3;C9JTK4;C9JPV8	A0A087WY71;Q96CW1;B4E304;E9PFW3;B4DNB9;B4DJB1;B4DFM1;B4DTI4;B7Z4N2;C9JJ47	AP-2 complex subunit mu	AP2M1			34.6	49.526	0.178197	0.926323	0.034097	0.469074	0.244206	0.853128	-0.0715288	-0.61822	27.5023	27.5765	27.559	27.4418	27.6532	27.6451	27.3264	27.6301	27.5691
A0A087WYF7;Q6UXV4;A0A087WUX8;Q68DW4	A0A087WYF7;Q6UXV4;A0A087WUX8;Q68DW4	MICOS complex subunit MIC27	APOOL;DKFZp779P1227			34.7	29.205	0.377341	0.844072	-0.0948505	-0.899104	0.169324	0.90118	0.0593433	0.448318	24.5144	24.5926	24.4831	24.4162	24.2717	24.6177	24.6541	24.4718	24.3577
A0A2U3TZH4;A0A087WYF8;Q53GG5;D6RAF1;A0A2R8Y6L7	A0A2U3TZH4;A0A087WYF8;Q53GG5;D6RAF1	PDZ and LIM domain protein 3	PDLIM3			24.4	21.754	3.1747	0.2815	0.486373	9.55992	0.0595008	0.96313	0.0146408	0.17176	24.0728	24.189	24.1448	24.6715	24.6468	24.5473	24.5117	24.6229	24.775
E9PFH7;B7ZMF3;A0A087WYG2;Q9UPT6	E9PFH7;B7ZMF3;A0A087WYG2;Q9UPT6	C-Jun-amino-terminal kinase-interacting protein 3	MAPK8IP3			3.2	146.68	0.126777	0.945377	0.0266781	0.345918	0.067278	0.960609	-0.0623697	-0.192827	22.7054	22.5117	22.5938	22.5299	22.6518	22.7093	22.9004	21.93	22.8736
A0A087WYN9;Q7Z478	A0A087WYN9;Q7Z478	ATP-dependent RNA helicase DHX29	DHX29			8.5	155.29	0.457931	0.800958	0.0995382	1.06128	0.129165	0.922069	-0.0317643	-0.351802	24.8771	25.1487	24.9569	25.0172	25.082	25.1821	25.1662	25.1069	24.9129
Q16365;A0A087WZ09;P43694;Q13222;Q8WYX6;B3KUF4	Q16365;A0A087WZ09;P43694;Q13222;Q8WYX6;B3KUF4	Transcription factor GATA-4	GATA4;GATA-4;pp10443			8.7	45.281	0.429555	0.811202	0.434173	1.00463	0.643059	0.670657	-0.453157	-1.42427	22.0531	23.3637	23.2888	23.4183	23.1786	23.4113	22.277	23.2847	23.0869
A0A087WZ13;E9PAU2;Q8IY67;K7EKR9	A0A087WZ13;E9PAU2;Q8IY67	Ribonucleoprotein PTB-binding 1	RAVER1			35.3	77.843	0.112488	0.951253	0.0163345	0.310322	0.0896301	0.946535	-0.0224412	-0.251912	27.531	27.5456	27.433	27.5198	27.587	27.4519	27.3371	27.5843	27.5699
Q5JPJ8;A0A087X0J3;A0A087WZ15;P40123;B7Z385;E9PDI2;B7Z4M3;F8WEW0;F8WDB9	Q5JPJ8;A0A087X0J3;A0A087WZ15;P40123;B7Z385;E9PDI2;B7Z4M3	Adenylyl cyclase-associated protein;Adenylyl cyclase-associated protein 2	DKFZp686D0714;CAP2			34.5	43.539	0.0721585	0.97361	0.0280851	0.205908	1.29623	0.493312	-0.338207	-2.76566	24.7156	24.8292	25.0354	25.0388	24.701	24.9247	24.6925	24.4693	24.4881
B4DYW0;A0A087WZ62;Q9H6U8;H0YCW6;B4DQI3;A0A087WTZ3;A0A087WVC0;A0A087WZY8;A0A087WX16;A0A087WV58	B4DYW0;A0A087WZ62;Q9H6U8;H0YCW6;B4DQI3	Alpha-1,2-mannosyltransferase ALG9	ALG9			13	95.952	0.048218	0.986019	0.0185273	0.14069	0.856169	0.596052	0.335965	1.84208	25.2893	25.611	25.4115	25.6364	25.3308	25.4003	26.066	25.5215	25.7878
Q53TQ6;R4GN62;A0A087WZG6;A0A087X1S9;Q8TEW8	Q53TQ6;R4GN62;A0A087WZG6;A0A087X1S9;Q8TEW8	Partitioning defective 3 homolog B	ALS2CR19;PARD3B			8.2	20.72	0.373137	0.844201	-0.548752	-0.89052	0.491229	0.740796	-0.707596	-1.12725	28.0085	28.5007	27.8737	26.6242	27.4675	28.645	26.835	27.2779	26.501
A0A087X2E5;A0A087WZN1;O43837	A0A087X2E5;A0A087WZN1;O43837	Isocitrate dehydrogenase [NAD] subunit, mitochondrial;Isocitrate dehydrogenase [NAD] subunit beta, mitochondrial	IDH3B			6.4	41.219	0.371526	0.844652	-0.285794	-0.887227	1.3148	0.481702	-1.25031	-2.80752	23.769	24.2548	24.2701	24.2898	23.3305	23.8163	22.5849	23.1541	21.9466
B4DGV1;A0A087WZV0;O43314;D6RBU4;H0Y9S9;F8W9A8;B7WPL9;Q6PFW1;H0Y9M0;K7EPT7;H7C436;K7ENU7;A0A087WWN8	B4DGV1;A0A087WZV0;O43314;D6RBU4	Inositol hexakisphosphate and diphosphoinositol-pentakisphosphate kinase 2	PPIP5K2			11.4	143.48	0.622693	0.723395	-0.0878741	-1.3846	0.282125	0.840721	0.0753237	0.700452	25.8738	25.6797	25.8242	25.6724	25.6871	25.7545	25.5887	25.8026	25.9486
A0A0S2Z5I7;A0A087X020;Q9Y3A5;F8WE72	A0A0S2Z5I7;A0A087X020;Q9Y3A5	Ribosome maturation protein SBDS	SBDS			14.8	28.763	0.740093	0.66082	0.956177	1.61351	0.679353	0.645819	0.886145	1.49497	22.2223	22.2024	22.142	21.9657	23.8275	23.642	24.0847	24.0155	23.9934
A0A087X054;A0A384P5T6;A0A494C039;Q9Y4L1;B7Z2N4;B3KXH0;B7Z766;E9PJ21;Q05D91;A0A087WWI4;Q6IN67;K7EQK2;B7Z602;A0A024R3G0;J3KTF1;J3QL06;Q9BST8;J3QQH7;J3QLE9;B7Z4E6;A0A087X214;A0A087WW13;Q68D25	A0A087X054;A0A384P5T6;A0A494C039;Q9Y4L1;B7Z2N4;B3KXH0;B7Z766;E9PJ21;Q05D91;A0A087WWI4;Q6IN67;K7EQK2;B7Z602;A0A024R3G0	Hypoxia up-regulated protein 1	HYOU1			41.3	104.78	0.369872	0.846722	0.0713787	0.883843	0.127409	0.921609	0.0382907	0.347476	29.5735	29.3528	29.5525	29.5012	29.5541	29.6376	29.4492	29.5608	29.7978
A0A087X0K9;G5E9E7;A9CQZ8;G3V1L9;Q07157;Q6MZU1;Q68DX9;B4DZK4;H0Y3R8;H0YKB1;Q9H317;H0YLT6	A0A087X0K9;G5E9E7;A9CQZ8;G3V1L9;Q07157;Q6MZU1;Q68DX9	Tight junction protein ZO-1	TJP1;DKFZp686A1195;DKFZp686M05161			19.9	187.85	0.242741	0.905333	0.045941	0.614998	1.17739	0.51865	-0.200443	-2.50419	27.316	27.4084	27.5257	27.509	27.3755	27.5035	27.3838	27.1521	27.2508
A0A384NLA7;A0A087X0L7;J3KNA0;Q2M1J6;Q15070;E7EVY0;C9JC63	A0A384NLA7;A0A087X0L7;J3KNA0;Q2M1J6;Q15070;E7EVY0;C9JC63	Mitochondrial inner membrane protein OXA1L	OXA1L			9.4	48.547	0.444134	0.808442	0.0628134	1.03379	3.55951	0.101	-2.69316	-12.0077	25.1586	25.3488	25.2909	25.3292	25.2892	25.3685	23.0762	22.4777	22.3534
A0A087X0M4;Q9BWU0;B4DV74;H7C256;A0A087WWF4	A0A087X0M4;Q9BWU0;B4DV74	Kanadaptin	SLC4A1AP			17.5	82.89	0.800436	0.637563	-0.0814025	-1.7319	1.15455	0.525922	0.232215	2.45513	24.4474	24.512	24.4263	24.3886	24.4442	24.3088	24.7716	24.5904	24.4761
Q2TAM5;E9PKH5;B4E082;A0A087X0W8;Q04206;Q96F54;E9PKV4;Q96CP1;A0A087WVP0;E9PM47;E9PNK5;E9PN69;E9PNV4;E9PMD5;E9PI38;E9PQS6	Q2TAM5;E9PKH5;B4E082;A0A087X0W8;Q04206;Q96F54;E9PKV4;Q96CP1;A0A087WVP0	Transcription factor p65	RELA			24.1	42.868	0.47755	0.793397	0.886795	1.1002	0.439587	0.766049	-0.0699126	-1.02471	24.8778	22.4762	24.9054	25.0181	25.0027	24.8989	24.9562	24.9644	24.7894
Q4W5H4;E0CX15;A0A087X152;A8K385;O95185;D6RE16	Q4W5H4;E0CX15;A0A087X152;A8K385;O95185	Netrin receptor UNC5C	UNC5C			8.1	56.289	1.18327	0.534645	-0.57406	-2.51688	0.00755721	0.995348	0.00776354	0.0230033	22.9525	23.5436	23.6859	22.8603	22.8596	22.7399	23.3669	22.2134	22.9028
Q9BZT2;Q5W0J0;A0A087X163;B7Z5V3;B7Z4P9;Q9NP72	Q9BZT2;Q5W0J0;A0A087X163;B7Z5V3;B7Z4P9;Q9NP72	Ras-related protein Rab-18	RAB18			30	7.6557	0.060608	0.977953	0.0239627	0.174777	0.283856	0.8404	-0.31171	-0.704156	23.4657	23.5722	23.5624	23.2973	23.6409	23.7341	22.4021	23.6323	23.7026
A0A087X1K9;E5RGR0;Q6IAQ1;B4DJV9;O75608;E5RJ48;B4DP64	A0A087X1K9;E5RGR0;Q6IAQ1;B4DJV9;O75608;E5RJ48;B4DP64	Acyl-protein thioesterase 1	LYPLA1			15.1	17.981	0.387526	0.838131	0.222794	0.919841	0.199824	0.882265	0.156878	0.518906	23.6378	22.9867	23.189	23.2179	23.7204	23.5436	24.1784	23.3653	23.4087
Q86SZ7;Q2TNB3;A0A087X1Z3;Q9UL46;H0YM70;Q6FHK9;H0YKU2	Q86SZ7;Q2TNB3;A0A087X1Z3;Q9UL46;H0YM70;Q6FHK9	Proteasome activator complex subunit 2	PSME2			43.9	27.401	0.0678579	0.974421	0.0145245	0.194387	0.197946	0.882813	-0.135485	-0.51462	26.5697	26.3902	26.5296	26.601	26.5084	26.4236	25.8811	26.4935	26.752
A0A087X211;Q8TCG1;F8WF26;F8WAX6	A0A087X211;Q8TCG1	Protein CIP2A	KIAA1524			8.2	102.28	0.208357	0.908712	-0.0491854	-0.538292	0.133563	0.921527	-0.0431175	-0.362596	24.5141	24.5366	24.4035	24.4681	24.2808	24.5577	24.2796	24.3352	24.5624
B7ZKT9;A0A087X256;Q2M389;F8W1W1;F8VYH7;F8VNZ5	B7ZKT9;A0A087X256;Q2M389	WASH complex subunit 7	KIAA1033			15.1	136.51	0.113524	0.952457	0.0186329	0.312924	0.651515	0.662254	0.0938581	1.44074	27.2307	27.1907	27.2937	27.3453	27.2585	27.1671	27.3111	27.3106	27.4308
A0A087X271;H3BVI6;B4DDF4;B2RWM5;Q6FHE4;B4DUT8;Q99439;A0A087X1X5;Q6FHC3;B4DHU5;B4DN57;Q53GK7;K7ES69;A0A087WV51;H3BQH0	A0A087X271;H3BVI6;B4DDF4;B2RWM5;Q6FHE4;B4DUT8;Q99439;A0A087X1X5;Q6FHC3;B4DHU5;B4DN57;Q53GK7	Calponin;Calponin-2	CNN2			29.1	19.757	1.26588	0.519165	0.215853	2.69785	0.976154	0.557833	0.216537	2.08316	24.865	24.8412	24.9253	24.9663	25.229	25.0837	25.4078	25.1718	25.349
Q8NDH0;E9PDU5;B4E256;A0A087X295;Q9NNW5;E9PBK6;B4DLP3;B4DK45;Q6AZD6;Q9H9M3;Q6PKC6;B3KRR8	Q8NDH0;E9PDU5;B4E256;A0A087X295;Q9NNW5	WD repeat-containing protein 6	DKFZp434F1720;WDR6			14.9	92.715	0.318947	0.872475	-0.141817	-0.778433	0.677086	0.646625	-0.228344	-1.49055	24.7713	25.1131	25.0015	25.1125	24.7456	24.6025	24.6251	24.5949	24.5556
A0A087X2D8;O60271;Q5JB53;B4DS36;Q719J0;H0YBE9;Q7Z5Q8;A0A060L980;D6RHI8;Q68CV8;H0YBS5;G1UI24	A0A087X2D8;O60271;Q5JB53;B4DS36	C-Jun-amino-terminal kinase-interacting protein 4	SPAG9			21.7	145.17	0.301515	0.880615	0.066384	0.741724	0.836239	0.604566	-0.0784702	-1.80257	27.0513	26.8617	27.1264	27.0318	27.0425	27.1643	27.0095	27.0115	26.9823
A0A087X2H1;Q9ULT8;H0YJP0;Q2KQ74;G3V4V5;H0YJD4;B3KWT6;H0YJV8	A0A087X2H1;Q9ULT8;H0YJP0;Q2KQ74	E3 ubiquitin-protein ligase HECTD1	HECTD1			8.1	289.63	0.22381	0.907619	-0.0573114	-0.573033	0.6604	0.658494	0.118474	1.45804	25.5877	25.8426	25.743	25.65	25.5604	25.7909	25.694	25.8338	25.8291
A0A087X2I1;P62333;V9HW24;H0YJC0;H0YJS8;B4DR91;H0YJT1;H0YJX2;H0YJE9	A0A087X2I1;P62333;V9HW24;H0YJC0	26S protease regulatory subunit 10B	PSMC6;HEL-S-73			59.3	45.796	0.362732	0.856588	0.0544014	0.869211	1.79317	0.408766	-0.322502	-4.00224	28.2474	28.0921	28.1404	28.2257	28.1357	28.2818	27.953	27.9674	27.7553
A0A090N7T9;Q12765;A0A024RA21;B4DH22;B4DIV7;C9K052;C9J7U9;B8ZZP4;B4DE46	A0A090N7T9;Q12765;A0A024RA21;B4DH22;B4DIV7	Secernin-1	SCRN1			19.8	46.382	0.275249	0.896968	-0.0967852	-0.685699	0.00707765	0.995441	-0.00248718	-0.0215552	26.2663	26.0027	26.4891	26.1431	26.1813	26.1434	26.1481	26.3547	25.9576
A0A090N7U0;Q13616;A0A0C4DGX4;B4DLA3;B3KTW0;Q75MQ1;B3KU45;K7EKM2;A0A286YF31	A0A090N7U0;Q13616;A0A0C4DGX4;B4DLA3;B3KTW0;Q75MQ1	Cullin-1	CUL1			37.1	89.677	0.0488607	0.985294	-0.00856845	-0.142477	0.441372	0.766537	0.0710983	1.02828	28.2251	28.0951	28.0436	28.0823	28.0904	28.1654	28.0561	28.2474	28.2479
A0A090N7V5;O75223;B8ZZK2;M0QZK8;B3KMN7;H7BZK5;A0A0B4J1Y4	A0A090N7V5;O75223;B8ZZK2;M0QZK8;B3KMN7	Gamma-glutamylcyclotransferase	C7orf24;GGCT			56.9	21.007	0.0420112	0.989598	0.0207418	0.123326	0.60253	0.686298	0.239311	1.34531	26.0033	25.8189	26.0663	25.6831	26.1094	26.1583	26.3525	26.0398	26.2764
A0A090N7W4;Q00535;Q6IAW3;A0A0S2Z355;F8VXD2;A0A2R8YEB7;B3KX76;F8VYH9;F8VZZ0;F8VTV8;F8VWX7;F8VZ51;Q6LC83;Q8IWB3;H0YAZ9;Q9BWF9;A0A024RBB6;E7EUK8;B4DK59;E5RGN0;Q96GA5;Q9BRL4;A0A087WZU2;A0A140VK97;A0A024R183;B7Z8T0;P11802;Q96Q40;O94921;Q00536	A0A090N7W4;Q00535;Q6IAW3;A0A0S2Z355	Cyclin-dependent-like kinase 5	CDK5			53.1	33.304	0.0297992	0.99501	0.007768	0.0885632	0.0642623	0.96059	-0.0142473	-0.184691	27.258	27.1081	27.0288	27.0642	27.1042	27.2497	27.061	27.0849	27.2296
A0A090N7X1;A0A090N7Y2;Q9UG63;C9JHK9;C9JZV3	A0A090N7X1;A0A090N7Y2;Q9UG63	ATP-binding cassette sub-family F member 2	ABCF2			23.4	71.289	0.544654	0.762896	-0.0920951	-1.23227	0.207153	0.875538	0.101865	0.535566	27.6757	27.4849	27.535	27.4747	27.3888	27.5558	27.267	27.5544	27.9034
A0A090N7Y0;Q96P47;Q9H3X2;Q96T14;Q86XV5;H0Y873;Q8N8Q2;D3DX07;Q6ZNF7;H7C4F1;C9J975;Q86ST5;E7ESL9	A0A090N7Y0;Q96P47;Q9H3X2;Q96T14;Q86XV5;H0Y873;Q8N8Q2;D3DX07;Q6ZNF7	Arf-GAP with GTPase, ANK repeat and PH domain-containing protein 3	CENTG3;AGAP3;DKFZp761E2216			5.4	95.043	0.0733486	0.973355	0.0299454	0.209082	0.102445	0.938622	-0.0239372	-0.284891	24.5289	24.907	24.8571	24.9088	24.6396	24.8345	24.7984	24.7208	24.7918
A0A090N8G0;P41250;Q75MN1;H7C443	A0A090N8G0;P41250	Glycine--tRNA ligase	GARS			43.2	77.53	0.877647	0.626332	0.140933	1.88482	0.308646	0.822942	-0.0912539	-0.756784	28.4564	28.2907	28.5258	28.5288	28.6178	28.549	28.6971	28.4265	28.2983
C9JZE3;C9JYJ8;A0A090N8Z2;A8K9F5;A0A090N8H1;Q9BWE0;E7EVL6	C9JZE3;C9JYJ8;A0A090N8Z2;A8K9F5;A0A090N8H1;Q9BWE0;E7EVL6	Replication initiator 1	REPIN1			7.4	41.364	0.571621	0.755194	1.14283	1.28501	0.954936	0.571615	-1.05253	-2.04008	23.7803	21.4887	24.1696	23.695	24.6851	24.487	24.006	22.5689	23.1345
C9JRT6;F8WDB6;A0A090N8Q5;H3BM14;H3BM74;Q9Y5A7	C9JRT6;F8WDB6;A0A090N8Q5;H3BM14;H3BM74;Q9Y5A7	NEDD8 ultimate buster 1	NUB1;NYREN18			16.9	29.539	0.417707	0.814388	-0.112211	-0.980848	0.423647	0.775079	0.133341	0.992783	23.8422	23.7931	23.7028	23.6234	23.5078	23.8702	23.9573	23.6845	23.7597
A0A090N8Y2;P13667;C9JMN9	A0A090N8Y2;P13667	Protein disulfide-isomerase A4	ERP70;PDIA4			62	72.932	0.222888	0.908765	0.0554123	0.570974	0.206065	0.876236	-0.0380872	-0.533099	32.1596	31.8727	31.9487	31.9585	32.0956	32.093	32.0346	31.9056	32.0927
B2RUU3;A0A2X0U2H5;A0A096LNH6;Q14185	B2RUU3;A0A2X0U2H5;A0A096LNH6;Q14185	Dedicator of cytokinesis protein 1	DOCK1			16.6	215.37	0.0350821	0.98975	-0.00873184	-0.103702	0.603948	0.684345	-0.144524	-1.34808	26.7907	26.8757	26.6239	26.8078	26.6757	26.7806	26.4567	26.5776	26.7962
A0A096LP25;L0R804;A0A096LNZ0;Q6ZSR9;A0A096LP60	A0A096LP25;L0R804;A0A096LNZ0;Q6ZSR9	Uncharacterized protein FLJ45252	AAK1			11.9	54.448	0.0437258	0.989459	-0.0287698	-0.128143	0.266097	0.846959	0.119636	0.665956	23.5658	23.9349	24.0926	23.5485	23.8518	24.1068	23.9782	23.8085	24.0792
F8W7U3;J3KP36;E7ESD2;B7ZME8;A8K5W5;A0A0A0MR88;A0A096LPC5;Q9Y4E1;Q641Q2;B4DPK9;Q9NVB8;B4DF48;A0A087WYF6;B4DHJ2;B1AP61;A0A0A0MT65	F8W7U3;J3KP36;E7ESD2;B7ZME8;A8K5W5;A0A0A0MR88;A0A096LPC5;Q9Y4E1;Q641Q2;B4DPK9;Q9NVB8;B4DF48;A0A087WYF6;B4DHJ2	WASH complex subunit FAM21C;WASH complex subunit FAM21A	FAM21A;FAM21C			5.7	136.86	0.169421	0.928293	-0.0543467	-0.448546	0.373243	0.804091	0.114757	0.890737	23.3508	23.2697	23.4235	23.2476	23.1256	23.5078	23.284	23.4623	23.479
A0A096LPI6;A0A096LNH5;H7C1F6;H7C2G3;P0DPI2;A0A140VKB0;A0A0B4J2D5;A0A096LP73;A0A2R8YDR7;F2Z2Q0;A0A096LP12;A0A0B4J2H4;A0A096LNJ1;A0A2R8Y6K9	A0A096LPI6;A0A096LNH5;H7C1F6;H7C2G3;P0DPI2;A0A140VKB0;A0A0B4J2D5		C21orf33			29	30.376	0.211369	0.907884	-0.0562159	-0.545099	1.46126	0.481535	0.299094	3.14822	25.1924	25.1012	24.9395	24.8788	25.0778	25.1079	25.2786	25.2403	25.4428
A8K2B4;A0A4D6J698;A0A097PID1;A0A097PIC4;A0A0U1RRM6;Q8N8S7;Q6ZSB8;Q6ZT55;A0A075B6E5;A0A0U1RQP7	A8K2B4;A0A4D6J698;A0A097PID1;A0A097PIC4;A0A0U1RRM6;Q8N8S7;Q6ZSB8;Q6ZT55	Protein enabled homolog	ENAH			12.6	63.996	0.669926	0.695357	0.166982	1.4766	0.506247	0.727445	-0.729026	-1.15686	23.8767	23.6221	24.0018	23.9995	24.0315	23.9706	24.007	23.7895	22.0179
U3KQC1;A0A0A0MQU0;Q9BV38;K7EIR0;K7EML4;A0A087X237;K7EKX5	U3KQC1;A0A0A0MQU0;Q9BV38;K7EIR0	WD repeat-containing protein 18	WDR18			15.2	43.237	0.0861414	0.971073	0.0312341	0.242825	0.649205	0.664582	-0.150522	-1.43624	25.774	26.0321	26.0982	26.0612	25.8365	26.1004	25.7563	25.816	25.9742
A0A0A0MQW0;A0A0C4DGV1;H0YN19	A0A0A0MQW0;A0A0C4DGV1;H0YN19		MYEF2			32.6	61.957	0.0337118	0.990618	-0.00402069	-0.0997903	2.01962	0.382691	0.264996	4.66438	26.9898	26.8999	26.9519	26.9117	26.9132	27.0046	27.3004	27.1837	27.1404
C9JP00;A0A0A0MQX8;Q9NR56;B4E233;Q86VM6	C9JP00;A0A0A0MQX8;Q9NR56;B4E233;Q86VM6	Muscleblind-like protein 1	MBNL1			10.9	37.898	0.214611	0.906737	0.0468941	0.552408	0.737599	0.620445	0.134733	1.60863	24.3747	24.4067	24.5192	24.3353	24.5451	24.5609	24.5866	24.5618	24.6971
A0A0C4DG68;A0A0A0MR59;B7ZL34	A0A0C4DG68;A0A0A0MR59;B7ZL34		PUM2			7.4	94.068	0.417236	0.813609	0.153357	0.979901	0.0131603	0.992205	0.00609207	0.0398108	24.5875	24.8291	25.0798	24.9364	25.1153	24.9048	24.9679	24.7649	25.2421
A0A0A0MRB5;Q8WXG6;F8W8U2	A0A0A0MRB5;Q8WXG6	MAP kinase-activating death domain protein	MADD			5.8	176.55	0.858774	0.628305	0.82756	1.84726	0.275705	0.840208	-0.0781091	-0.686678	23.1154	21.6446	21.9609	23.0098	23.082	23.1118	23.0486	23.1432	22.7774
Q5G0E1;A0A0A0MRE1;B4DJ07;A0A0A0MSB8;Q9UPT5;Q63HP7;C9JME6;B5MCY9;K7ERQ5;C9JKC2	Q5G0E1;A0A0A0MRE1;B4DJ07;A0A0A0MSB8;Q9UPT5;Q63HP7	Exocyst complex component 7	EXOC7;DKFZp686P1551			18.3	70.2	0.756563	0.657943	-0.108387	-1.64575	1.18682	0.516593	0.209413	2.52456	25.2372	25.2056	25.1925	25.0568	25.0225	25.2309	25.2835	25.2407	25.4141
A0A0A0MRE5;Q9ULH1;H0YBF7;E5RHD7;E5RFD9;H0YBM4	A0A0A0MRE5;Q9ULH1;H0YBF7	Arf-GAP with SH3 domain, ANK repeat and PH domain-containing protein 1	ASAP1			8.9	124.77	0.493595	0.783745	-0.890176	-1.13192	0.0515401	0.967272	-0.152228	-0.149903	23.8777	23.8984	23.6752	23.7817	21.3628	23.6363	22.6564	21.7189	23.9488
A0A0A0MRE6;O94967;B4DHA1;E9PKZ6;E9PR96	A0A0A0MRE6;O94967;B4DHA1	WD repeat-containing protein 47	WDR47			6.4	98.701	1.44314	0.49381	0.445154	3.10499	0.413341	0.784985	-0.117858	-0.972062	24.1678	24.2148	23.8645	24.5768	24.6568	24.3489	24.515	24.2557	24.4583
A0A0A0MRH8;A0A0A0MSH9;A0A494C1F7;X5D2E5;Q86WJ1;B4DLS6;Q9H678;A0A494C179;A0A494C1P7;A0A494C0F0;A0A494C0J6;A0A087WTM4;B4DPN5	A0A0A0MRH8;A0A0A0MSH9;A0A494C1F7;X5D2E5;Q86WJ1;B4DLS6;Q9H678;A0A494C179;A0A494C1P7	Chromodomain-helicase-DNA-binding protein 1-like	CHD1L			11.5	83.719	0.072705	0.973938	-0.0657533	-0.207366	0.0404572	0.976205	-0.0566349	-0.118948	24.0829	24.5343	24.3484	24.6055	24.4798	23.6831	24.9121	24.0646	23.6218
A0A384MDK7;A0A0A0MRJ6;H7BY58;P22061;B7Z972;F6S8N6;A0A3F2YNX8;F8WDT3;F8WAV5;F8WAX2;C9J0F2	A0A384MDK7;A0A0A0MRJ6;H7BY58;P22061;B7Z972;F6S8N6;A0A3F2YNX8	Protein-L-isoaspartate O-methyltransferase;Protein-L-isoaspartate(D-aspartate) O-methyltransferase	PCMT1			45.8	24.636	0.884914	0.619598	0.145604	1.89931	0.0219972	0.989414	-0.00375239	-0.0659116	26.0044	26.2031	26.1999	26.2086	26.2913	26.3442	26.3596	26.2347	26.2386
A0A0A0MRM8;A0A1Y0BRN0;A0A1Y0BRN3;A0A0D9SGC1;E7EW20;Q9UM54;Q5JVM0	A0A0A0MRM8;A0A1Y0BRN0;A0A1Y0BRN3;A0A0D9SGC1;E7EW20;Q9UM54	Unconventional myosin-VI	MYO6			26.2	145.01	1.1568	0.534491	-0.13959	-2.45995	0.13524	0.92322	-0.0742575	-0.366697	27.1175	27.276	27.2474	27.1058	27.0162	27.1003	26.6014	27.2374	27.1607
B2RAU8;A0A0A0MRM9;Q14978;Q96J17;S4R402;S4R341;S4R349	B2RAU8;A0A0A0MRM9;Q14978;Q96J17	Nucleolar and coiled-body phosphoprotein 1	NOLC1			5.9	73.603	0.650287	0.707624	-0.339525	-1.43835	0.109559	0.934557	-0.0684147	-0.302942	23.2648	23.2327	23.5217	23.1809	22.567	23.2528	23.0005	22.9835	22.8115
Q6PK21;A0A0A0MRN5;Q05BV5;Q9NZT2;B3KMQ6;V9H0E3;A0A087X028;V9H0H8	Q6PK21;A0A0A0MRN5;Q05BV5;Q9NZT2;B3KMQ6;V9H0E3	Opioid growth factor receptor	OGFR			21.6	54.097	1.55389	0.454196	0.152004	3.3743	1.17031	0.521288	0.106841	2.48895	24.7811	24.6291	24.7044	24.8749	24.8396	24.856	24.9231	24.9208	25.0471
A0A0A0MRP6;B7ZLQ5;P28370;Q86UA8;D7EZH4	A0A0A0MRP6;B7ZLQ5;P28370;Q86UA8;D7EZH4	Probable global transcription activator SNF2L1	SMARCA1			28.7	122.86	0.302433	0.880853	-0.0782299	-0.743665	0.202028	0.880796	-0.109717	-0.523926	27.2664	27.4143	27.2698	27.2947	27.0566	27.3646	26.8064	27.1245	27.4559
A0A1B0GW37;U3KQE8;Q5VW28;A0A1B0GWJ4;A0A0A0MRX8;A0A1B0GU97;A0A1B0GWI9;Q5VW27;Q5VW30;A0A2R8Y7V8;Q5VW26;O00712;A0A1B0GVN4;B4DS74;A0A1B0GWB8;U3KPY9;A0A1B0GTC1;A0A087WXP2;Q5W0Y9;A0A0S2Z4H3;S4R308;K7ESG9;K7EKH0;Q13051;Q5VW31;K7EJB0;Q7Z3K7;C9JWJ8;K7EN08;D2DXM9;B4DHW2;Q14938	A0A1B0GW37;U3KQE8;Q5VW28;A0A1B0GWJ4;A0A0A0MRX8;A0A1B0GU97;A0A1B0GWI9;Q5VW27;Q5VW30;A0A2R8Y7V8;Q5VW26;O00712;A0A1B0GVN4;B4DS74;A0A1B0GWB8	Nuclear factor 1;Nuclear factor 1 B-type	NFIB			23.8	46.404	0.504741	0.785262	0.138085	1.15389	1.58875	0.465096	-0.376085	-3.46169	26.3465	26.7052	26.7027	26.702	26.7261	26.7405	26.3584	26.5279	26.1541
A0A0A0MS41;A0A1P0AYU5;B4DRS6;Q9BWM7;S4R3N9	A0A0A0MS41;A0A1P0AYU5;B4DRS6;Q9BWM7;S4R3N9	Sideroflexin;Sideroflexin-3	SFXN3			42.7	35.503	0.212176	0.907366	-0.0594082	-0.546921	0.172131	0.899751	-0.0482877	-0.454905	26.4042	26.4164	26.5566	26.2742	26.5905	26.3343	26.2981	26.3192	26.4368
B7Z992;A0A0A0MS51;B7Z9A0;B7Z6N2;A0A0A0MT01;A0A384MEF1;P06396;B7Z2X4;B7Z4U6;A0A0U1RQL8;Q5T0I0;Q69YR8	B7Z992;A0A0A0MS51;B7Z9A0;B7Z6N2;A0A0A0MT01;A0A384MEF1;P06396;B7Z2X4;B7Z4U6	Gelsolin	GSN			17.8	78.831	0.645743	0.707449	0.165262	1.4295	0.0429705	0.974086	0.0189215	0.126023	25.3887	25.3904	25.5624	25.5469	25.8092	25.4811	25.8537	25.5402	25.5001
B2RB89;A0A0A0MS54;B4E2L0;P22694;B7ZA00;A0A087WVC4;B1APG1;B1APG0;B1APG2;B1APF8;B1APF9;B1APG3;B1APF7;P22612;K7ENJ5	B2RB89;A0A0A0MS54;B4E2L0;P22694;B7ZA00;A0A087WVC4;B1APG1;B1APG0;B1APG2;B1APF8;B1APF9;B1APG3;B1APF7	cAMP-dependent protein kinase catalytic subunit beta	PRKACB			38.5	40.622	0.497298	0.781851	0.072293	1.13923	1.05461	0.536467	0.198636	2.24447	26.4877	26.481	26.4279	26.4274	26.5499	26.6362	26.8535	26.6309	26.7249
Q68CP7;A0A0A0MS99;I3L4X2;P33527;Q9UQ98;Q9BV39	Q68CP7;A0A0A0MS99;I3L4X2;P33527;Q9UQ98;Q9BV39	Multidrug resistance-associated protein 1	DKFZp781G125;ABCC1;MRP			6.9	134.93	0.535098	0.765679	0.104641	1.21354	1.12766	0.524068	0.122073	2.39782	24.1259	23.8887	24.0544	24.0359	24.2081	24.139	24.2609	24.2309	24.2574
A0A0A0MSK5;Q5JTV8;J3KN66;H0YD16;H0Y4R4;H0YDU3	A0A0A0MSK5;Q5JTV8;J3KN66;H0YD16	Torsin-1A-interacting protein 1	TOR1AIP1			29.4	52.406	0.259309	0.901267	0.0740267	0.651234	1.10017	0.530903	-0.176764	-2.33973	26.8299	26.4709	26.683	26.7226	26.8196	26.6637	26.641	26.441	26.5936
I3UJJ7;A0A0A0MSN4;P12821;D3DU13;I6L9B3;F6X3S4;B4DXK6;J3KTB8;J3QLR4;J3KSQ5;B4DKH4	I3UJJ7;A0A0A0MSN4;P12821;D3DU13;I6L9B3;F6X3S4;B4DXK6	Angiotensin-converting enzyme;Angiotensin-converting enzyme, soluble form	ACE			5.2	142.48	0.362107	0.855333	0.135721	0.867927	0.0999718	0.939518	0.0416896	0.278574	24.0309	24.1933	24.1018	24.2037	24.0088	24.5206	24.2749	24.3109	24.2724
A0A0A0MSW4;P48739;B2R7P6;B3KYB7;B3KYB6;B3KVT6	A0A0A0MSW4;P48739;B2R7P6	Phosphatidylinositol transfer protein beta isoform	PITPNB			44.6	31.581	0.492824	0.784312	-0.0866318	-1.1304	0.805454	0.599169	-0.196615	-1.74178	26.5283	26.6577	26.7853	26.5711	26.5369	26.6034	26.4387	26.5257	26.1571
A0A0A0MTN9;J3QQX3;A0A0A0MTR6;B4DDI9;Q6GSK2;A0A0C4DFN8;A0A0A0MSZ4;A0A0A0MT64;P22570;A0A0C4DGN7;B3KSQ6;J3QKZ8	A0A0A0MTN9;J3QQX3;A0A0A0MTR6;B4DDI9;Q6GSK2;A0A0C4DFN8;A0A0A0MSZ4;A0A0A0MT64;P22570;A0A0C4DGN7	NADPH:adrenodoxin oxidoreductase, mitochondrial	FDXR			12.3	48.027	0.314222	0.874718	-0.558947	-0.768517	0.316229	0.820007	0.561378	0.772733	24.3036	24.0842	23.9396	23.9678	22.1487	24.534	24.1622	23.9186	24.2538
M0R116;A0A2R8YEY8;Q53ES0;B7Z9V4;A0A0A0MT26;P13637;B7Z1Q9;B7Z3F8;B3KV59;B3KSY7;B3KNQ8;B4E0R9;B4DHD7;B4DRW5;Q658V6;Q53FM3;A0A384MR29;P20648;M0QXF2;A0A0S2Z3D3;Q58I22;Q58I21	M0R116;A0A2R8YEY8;Q53ES0;B7Z9V4;A0A0A0MT26;P13637;B7Z1Q9;B7Z3F8;B3KV59;B3KSY7;B3KNQ8	Sodium/potassium-transporting ATPase subunit alpha-3	ATP1A3			23.8	108.28	0.708327	0.673302	0.174542	1.55146	0.451511	0.762614	-0.10067	-1.0485	24.4516	24.1282	24.3771	24.3823	24.5538	24.5443	24.5492	24.3104	24.3189
B7Z876;B7Z3A4;A0A0A0MT33;Q9UPN6;Q05BU5;Q8NDE9;Q9H8B2;Q59EY7	B7Z876;B7Z3A4;A0A0A0MT33;Q9UPN6;Q05BU5	Protein SCAF8	SCAF8;RBM16			7.7	145.16	0.30242	0.880405	-0.0965029	-0.743639	0.208921	0.873614	-0.0553932	-0.539567	24.5283	24.4368	24.2123	24.1298	24.4373	24.3207	24.3131	24.1444	24.2641
A0A0A0MT60;Q5T1M5;B4DVS2;B4DZS8;X6RKW4	A0A0A0MT60;Q5T1M5;B4DVS2;B4DZS8	Peptidyl-prolyl cis-trans isomerase;FK506-binding protein 15	FKBP15			10	136.27	0.801601	0.640327	-0.129731	-1.73419	0.234094	0.858014	0.044536	0.595907	26.1799	26.1626	26.1663	25.8997	26.0654	26.1544	26.0903	26.0765	26.0863
A0A384MR53;A0A0A0MT83;A0A2L0RI93;A0A2L0RI88;P26440;A0A0S2Z4K7;A0A2L0RI76;A0A2L0RIE3;H0YLC3;H7C4G6;H0YKV0;H0YN10;A0A087WVD3;A0A0S2Z3Z7;A0A2L0RIB1	A0A384MR53;A0A0A0MT83;A0A2L0RI93;A0A2L0RI88;P26440;A0A0S2Z4K7;A0A2L0RI76;A0A2L0RIE3;H0YLC3;H7C4G6	Isovaleryl-CoA dehydrogenase, mitochondrial	IVD			29.1	46.236	0.176795	0.926711	-0.0447731	-0.465806	0.267596	0.846489	0.0866267	0.669196	27.1023	27.3619	27.2668	27.2586	27.0807	27.2573	27.063	27.345	27.4485
A0A0A0MTB8;Q8NI36	A0A0A0MTB8;Q8NI36	WD repeat-containing protein 36	WDR36			35.2	99.365	1.18937	0.534572	-0.154974	-2.53007	0.0855821	0.949306	0.013031	0.241363	27.8119	27.9187	27.765	27.7567	27.6538	27.6202	27.753	27.6319	27.6849
B7ZL25;A0A140TA45;A0A140TA40;A0A0A0MTG1;B4E0K6;A0A140T8Y0;A0A0G2JIA5;A0A1U9X9B9;A0A1U9X9B5;A0A1U9X9B3;A0A140TA36;A0A140TA35;A0A0G2JL52;Q5ST30;B2RDZ1;A0A1U9X9A2;A2ABL6;B4DG77;Q9H6B7;B7ZCJ6	B7ZL25;A0A140TA45;A0A140TA40;A0A0A0MTG1;B4E0K6;A0A140T8Y0;A0A0G2JIA5;A0A1U9X9B9;A0A1U9X9B5;A0A1U9X9B3;A0A140TA36;A0A140TA35;A0A0G2JL52;Q5ST30;B2RDZ1;A0A1U9X9A2	Valine--tRNA ligase, mitochondrial	VARS2			5.5	118.37	0.654574	0.708739	-0.0737336	-1.44669	0.424696	0.77652	-0.260487	-0.99489	24.1375	24.2391	24.0711	24.0855	24.0941	24.0469	23.2925	24.0917	24.0609
V9HWF0;A0A0A0MTH3;Q13418;E9PQ52;A0A087WW45;A0A087WWY6	V9HWF0;A0A0A0MTH3;Q13418	Integrin-linked protein kinase	HEL-S-28;ILK			21.7	51.419	0.115481	0.95303	0.0340284	0.317834	1.01769	0.546404	0.266916	2.16816	26.0089	26.0043	25.982	25.9858	26.2362	25.8754	26.2176	26.261	26.4194
Q2M1V9;A0A0A0MTH9;O14981;Q8N6J1;Q59HB6;Q6PI32;Q05C17	Q2M1V9;A0A0A0MTH9;O14981	TATA-binding protein-associated factor 172	BTAF1			8.8	206.89	0.225565	0.907846	0.0842851	0.576951	0.140968	0.921266	-0.0588404	-0.380638	26.1604	26.3509	26.0056	26.3956	26.047	26.3271	25.9828	26.251	26.3594
Q3LIE7;A0A0A0MTI1;Q15392;B7ZAV4;B7Z919;H7C4B7;B7Z546;B7Z943	Q3LIE7;A0A0A0MTI1;Q15392;B7ZAV4;B7Z919	Delta(24)-sterol reductase	Nbla03646;DHCR24			14.1	49.436	0.109638	0.953164	-0.0510686	-0.303141	0.0976453	0.940219	-0.0848522	-0.272611	25.3168	25.5871	25.3337	25.1675	25.2741	25.6428	24.7572	25.6978	25.3749
A0A140VKB1;A0A0A0MTN0;Q13617;Q5T2B5;B7Z1Y1;Q5T2B7	A0A140VKB1;A0A0A0MTN0;Q13617;Q5T2B5;B7Z1Y1	Cullin-2	CUL2			20.1	86.982	0.00104882	0.999868	-0.000244776	-0.00321611	0.298373	0.830799	0.0788949	0.735069	26.6041	26.6012	26.6672	26.7575	26.6082	26.5061	26.5672	26.8398	26.7015
A0A0A6YYI3;A0A0B4J1V8;Q9NQ55;A8MV53;H7C446;C9J3W3;C9JHF7	A0A0A6YYI3;A0A0B4J1V8;Q9NQ55;A8MV53	Suppressor of SWI4 1 homolog	PPAN-P2RY11;PPAN			24.8	58.199	1.22438	0.545546	-0.18413	-2.60631	0.27157	0.843722	0.0533504	0.677777	26.0673	26.0891	25.9822	25.7406	25.9496	25.8959	25.8201	25.9643	25.9618
A0A0A6YZ17;Q92995;H7C5J3	A0A0A6YZ17;Q92995;H7C5J3	Ubiquitin carboxyl-terminal hydrolase;Ubiquitin carboxyl-terminal hydrolase 13	USP13			5.3	97.326	0.271695	0.897417	0.182374	0.678046	0.464791	0.757091	-0.434944	-1.07491	22.1691	22.857	23.0501	22.8389	22.9328	22.8516	22.0917	23.2441	21.9826
Q6I7N8;A0A0B4J1V9;Q9NRZ9;A0A087WSW7;F6XU50;Q9NW36;B1ALG6;Q76H82;Q0VGL2	Q6I7N8;A0A0B4J1V9;Q9NRZ9;A0A087WSW7;F6XU50	Lymphoid-specific helicase	HELLS			15.1	93.961	0.299284	0.882274	-0.072883	-0.737	0.195277	0.884288	-0.0655441	-0.508513	25.9497	25.6862	25.8096	25.7837	25.8249	25.6183	25.4713	25.7006	25.8583
B4E1A5;B4DSQ6;F5GY88;A0A0B4J1W0;O75448;B4DDR8;F5H5K2;B4DV99;B9TX72;B4E0S3;B9TX73;B9TX64;B9TX63;B9TX65;B9TX62;E9PFL1;B9TX69;B9TX74;B9TX68	B4E1A5;B4DSQ6;F5GY88;A0A0B4J1W0;O75448;B4DDR8;F5H5K2;B4DV99;B9TX72;B4E0S3	Mediator of RNA polymerase II transcription subunit 24	MED24			12.9	99.686	0.747053	0.661397	-0.276459	-1.62713	0.526981	0.709615	0.343824	1.19762	24.1658	24.5481	24.5273	24.3692	24.0132	24.0295	25.0033	24.1714	24.2686
A0A0B4J1Z1;B4DEK2;C9JAB2;Q16629;Q8NB80	A0A0B4J1Z1;B4DEK2;C9JAB2;Q16629;Q8NB80	Serine/arginine-rich splicing factor 7	SRSF7			34.3	15.763	1.13865	0.526965	-0.113223	-2.42119	0.562306	0.691968	-0.157693	-1.26681	27.3076	27.3211	27.2695	27.2618	27.1089	27.1879	26.8866	26.9397	27.2593
B3KP31;A0A0B4J2A0;Q9UHJ6;B4DPJ0	B3KP31;A0A0B4J2A0;Q9UHJ6	Sedoheptulokinase	TRPV1;SHPK			14.2	51.488	2.12801	0.342357	1.69097	5.0082	0.806815	0.59969	-1.58682	-1.74447	21.7846	22.9201	22.1532	23.9474	23.9156	24.0678	24.0542	22.1898	20.9264
S4R456;K7EM56;A0A0B4J2B4;K7EJ78;S4R417;K7EQJ5;K7ELC2;P62841	S4R456;K7EM56;A0A0B4J2B4;K7EJ78;S4R417;K7EQJ5;K7ELC2;P62841	40S ribosomal protein S15	RPS15			45.6	8.0266	0.378508	0.841783	0.72337	0.901484	0.553038	0.698199	-0.9468	-1.24868	22.934	25.212	25.4497	25.2129	25.3107	25.2422	24.969	25.1594	22.7971
A0A0P1J1R0;Q5W0H4;A0A0B4J2C3;P13693;A0A024RDY2;J3KPG2;B4DKJ4;E9PJF7;H0YCX0;Q56UQ5;Q9UP43;B4DLD6	A0A0P1J1R0;Q5W0H4;A0A0B4J2C3;P13693;A0A024RDY2;J3KPG2;B4DKJ4;E9PJF7	Translationally-controlled tumor protein	TPT1			29.7	19.595	0.0152144	0.999918	-0.00674311	-0.0459214	0.245141	0.852483	0.0965538	0.620274	26.9155	26.5793	26.9221	26.6118	26.8906	26.8942	26.6501	26.9824	27.0538
A0A0B4J2E5;Q15269;Q59FM2;C9J544;A0A0J9YX21	A0A0B4J2E5;Q15269	Periodic tryptophan protein 2 homolog	PWP2			24.6	102.45	0.269476	0.898012	-0.0955448	-0.673259	0.0933651	0.944459	0.0379391	0.261588	26.8453	27.145	27.0118	27.0969	26.7078	26.9108	27.1265	26.8498	26.8529
B3KRC6;A0A0C4DFL7;Q16850;Q05D40;H7C0D0	B3KRC6;A0A0C4DFL7;Q16850	Lanosterol 14-alpha demethylase	CYP51A1			37.9	51.422	0.714803	0.674817	0.131574	1.5641	1.34747	0.473593	0.142733	2.88185	26.4828	26.7149	26.5419	26.6278	26.7153	26.7912	26.8477	26.8829	26.832
G3V5T0;B2RDN1;A0A0C4DFM0;G3V4T6;O43708;A0A0A0MR33;Q59FU9;G3V267;H0YJN8;G3V3B9	G3V5T0;B2RDN1;A0A0C4DFM0;G3V4T6;O43708;A0A0A0MR33;Q59FU9;G3V267	Maleylacetoacetate isomerase	GSTZ1			21.3	22.61	0.446073	0.808328	0.23909	1.03766	0.16424	0.902667	0.0571995	0.436339	23.297	23.2628	22.6081	23.2562	23.4004	23.2285	23.5917	23.2274	23.2377
A0A0C4DFT3;Q12959;Q59FC4;B4DF78;E7EQD7;Q8N3T5;B4E2H8;Q6PJH1;C9JUA9;C9JN61;C9JCP6;A8MUT6;H7C166;C9J110;A0A3G9CMW0;A0A3G9CMV0;F2Z2L0;H7C325;B5MCC5;B7Z646;B7Z264;F8VYC1;E9PIW2;B7Z2T4;E9PN83;A0A3B3ISW2;A0A3B3ITF1;Q15700;C9IYP1;F8W750;B7Z395;Q5JUW8;Q59FY1;Q92796	A0A0C4DFT3;Q12959;Q59FC4;B4DF78;E7EQD7	Disks large homolog 1	DLG1			23.4	99.813	0.0762797	0.972844	-0.012181	-0.216873	0.262964	0.847698	0.0489082	0.659169	25.8731	25.9675	26.0144	25.9833	25.8642	25.971	26.1148	25.9408	25.9096
B3KSP0;B3KTK5;H0Y3X6;A0A0C4DFX9;Q9H3P2;Q53GS8;B3KM78;C9JEM7;H7C2C7;C9JHL4;H7C0W2	B3KSP0;B3KTK5;H0Y3X6;A0A0C4DFX9;Q9H3P2;Q53GS8;B3KM78	Negative elongation factor A	WHSC2;NELFA			26	42.53	0.206808	0.910412	0.0669899	0.534783	0.0471779	0.970016	0.0186914	0.137794	24.5754	24.2938	24.3437	24.312	24.6249	24.4769	24.6139	24.5665	24.2895
E7EW77;E7EP65;A0A0C4DG21;F8WAL6;Q9NYB9;E9PEZ7;Q53RS4;B7Z836;F8WBL5;F8WEB9;H0Y6B5;Q53SH3;B7Z612;E7EUA1;B7Z9N5;F8WAU3;F8WCD7;F8WAZ8;H7C3Q7;B4DG63;B7Z9E9;B7ZAM8;B4DSH8;B4DMM5;Q13802;B4DKX2;B7Z617;B7Z5L1	E7EW77;E7EP65;A0A0C4DG21;F8WAL6;Q9NYB9;E9PEZ7;Q53RS4;B7Z836	Abl interactor 2	ABI2;ABI-2			24.8	52.789	0.783281	0.645061	-0.119898	-1.69816	0.815175	0.592662	0.185025	1.76095	27.3141	27.4649	27.3167	27.17	27.2261	27.34	27.2524	27.4763	27.5625
B4DER6;A0A0C4DG33;O43933;H7BZH3;Q96S70	B4DER6;A0A0C4DG33;O43933	Peroxisome biogenesis factor 1	PEX1			4.6	119.6	0.602279	0.736255	-0.182794	-1.34483	0.334317	0.81395	-0.233608	-0.810519	23.7501	23.4404	23.6505	23.4214	23.2614	23.6099	23.285	22.6919	23.6149
Q59GQ7;A0A0C4DGA6;A8K5B6;Q14527;Q05DF7;Q05DQ5;Q05BZ6;H7C5K0	Q59GQ7;A0A0C4DGA6;A8K5B6;Q14527;Q05DF7;Q05DQ5;Q05BZ6	Helicase-like transcription factor	HLTF			15.5	111.97	0.130138	0.94516	-0.0792726	-0.354196	0.208885	0.872917	0.0867373	0.539486	25.6455	25.2057	25.1422	25.5334	24.9859	25.2363	25.3499	25.2848	25.3811
E9PIY1;A0A0C4DGG1;B4DUI2;D3DQR0;Q9UKS6;E9PJ75;E9PNM9;B4DV80;E9PJ33	E9PIY1;A0A0C4DGG1;B4DUI2;D3DQR0;Q9UKS6;E9PJ75;E9PNM9;B4DV80	Protein kinase C and casein kinase substrate in neurons protein 3	PACSIN3			10	37.213	0.51335	0.782344	-0.20391	-1.17084	1.45679	0.48363	-0.600983	-3.13753	24.0528	24.067	24.2874	24.1768	23.64	23.9787	23.1321	23.5123	23.3481
A0A2R8Y425;A0A2R8Y5J0;A0A2R8YFK9;A0A2U3TZM0;F5GWX5;A0A2R8Y212;A0A2R8Y521;A0A0C4DGG9;Q14839;B3KY63;A0A2R8YFD8;A0A2R8YD40;A0A2R8YDJ9;A0A2R8Y4X2;A0A2R8YDW2;A0A2R8Y8C1;A0A2R8YER1;A0A2R8Y445;A0A2R8Y685;A0A2R8Y5Z7;A0A2R8Y7I0;A0A2R8Y7M9;A0A2R8Y8B3;A0A2R8Y5M9;A0A2R8YE38;Q8TDI0;K7EMY3;Q659F1;Q659D0;Q6ZU36;B3KRD4;F5H6N4;Q05CG6;A0A2R8Y6G9;Q6ZSZ4;F2Z2R5;A0A2R8Y7X1;I3L229;H7C3H7;H7C0J3;A0A2R8Y795;F6T542	A0A2R8Y425;A0A2R8Y5J0;A0A2R8YFK9;A0A2U3TZM0;F5GWX5;A0A2R8Y212;A0A2R8Y521;A0A0C4DGG9;Q14839;B3KY63;A0A2R8YFD8;A0A2R8YD40;A0A2R8YDJ9;A0A2R8Y4X2;A0A2R8YDW2;A0A2R8Y8C1;A0A2R8YER1;A0A2R8Y445;A0A2R8Y685;A0A2R8Y5Z7	Chromodomain-helicase-DNA-binding protein 4	CHD4			42.8	215.49	1.09385	0.527947	-0.13958	-2.32645	0.197505	0.882872	-0.02915	-0.513611	30.0893	30.0379	29.941	29.9492	29.8071	29.8931	29.8023	29.8295	29.9302
A0A0C4DGQ5;P04632;K7ELJ7;K7EM73;K7EIV0;A0A075B7C0;K7EKD8;U3KQE2;U3KPR7;K7ES78;Q96L46;K7EMQ1	A0A0C4DGQ5;P04632;K7ELJ7;K7EM73;K7EIV0;A0A075B7C0;K7EKD8;U3KQE2;U3KPR7	Calpain small subunit 1	CAPNS1			45	33.786	0.727416	0.66953	0.219016	1.58873	0.715625	0.628695	0.231726	1.5657	26.7001	26.6687	26.552	26.7877	27.1121	26.6782	27.2305	27.0356	27.007
B4DG54;A0A0D9SEJ5;F5GY05;B4DSS4;Q96EK7;B4DKV5	B4DG54;A0A0D9SEJ5;F5GY05;B4DSS4;Q96EK7;B4DKV5	Constitutive coactivator of peroxisome proliferator-activated receptor gamma	FAM120B			7.2	105.25	0.00757014	0.998979	-0.0319703	-0.0230423	0.31946	0.821222	0.844636	0.779509	25.0508	24.6687	22.2628	25.2849	21.8249	24.7767	24.9692	24.8349	24.6163
Q5T321;A0A0D9SF28;F5GXV7;Q8NFP9;B3KXQ8;Q6N008;B3KVG9;B3KRF6;B7Z4S7;B7Z9H4;D3DP68	Q5T321;A0A0D9SF28;F5GXV7;Q8NFP9	Neurobeachin	NBEA			20.1	327.55	0.153943	0.936359	-0.0271193	-0.411873	0.054397	0.968167	0.0107702	0.157782	27.7881	28.0087	27.8553	27.8665	27.8641	27.84	27.7505	27.8673	27.9852
A0A0D9SFB3;A0A2R8YF78;A0A0D9SG12;A0A2R8YFS5;B5BTY4;A0A2R8Y4A4;A0A0D9SF53;O00571;A0A2R8YCW1;Q59GX6;A0A2R8Y5G6;F6S8Q4;A0A2R8YDH3;A0A2R8YDT5;A0A2R8Y7T2;B4DLU5;A0A024R9A4;O15523;Q5S4N1;B4E010;B4E132;B4E3C4;A0A2R8YCU0;A0A2R8Y650;A0A0J9YVQ7;C9J081;A0A087WVZ1;C9J8G5;B4DLA0;A0A087WX09;A0A2R8YF89;A0A2R8Y770;A0A2R8Y4D2;D6RCM4;Q9NQI0;H0Y960	A0A0D9SFB3;A0A2R8YF78;A0A0D9SG12;A0A2R8YFS5;B5BTY4;A0A2R8Y4A4;A0A0D9SF53;O00571;A0A2R8YCW1;Q59GX6;A0A2R8Y5G6;F6S8Q4;A0A2R8YDH3;A0A2R8YDT5;A0A2R8Y7T2;B4DLU5;A0A024R9A4;O15523;Q5S4N1;B4E010	ATP-dependent RNA helicase DDX3X;ATP-dependent RNA helicase DDX3Y	DDX3X;DDX3Y			62.2	70.839	0.297536	0.881997	-0.0481129	-0.733295	0.453549	0.762536	-0.0876802	-1.05256	30.4395	30.4459	30.4294	30.5191	30.3062	30.3452	30.2021	30.3322	30.3731
E7EXA6;Q96S08;A0A0D9SF58;Q8WVB6	E7EXA6;Q96S08;A0A0D9SF58;Q8WVB6	Chromosome transmission fidelity protein 18 homolog	CHTF18;RUVBL			4.5	107.43	0.413903	0.817203	-0.191472	-0.973194	0.449283	0.760757	0.217241	1.04406	23.2291	23.3822	23.5031	23.3586	23.3615	22.8199	23.5055	23.4974	23.1887
A0A0D9SFB1;B7ZAC0;B4DK06;A0A0U1RQP1;Q05193;A0A0D9SFE4;B4DHH5;Q59GI5;A0A1B0GUX5;A0A1B0GU67;B3KU80	A0A0D9SFB1;B7ZAC0;B4DK06;A0A0U1RQP1;Q05193;A0A0D9SFE4;B4DHH5;Q59GI5;A0A1B0GUX5;A0A1B0GU67	Dynamin-1	DNM1			33.7	94.016	0.694301	0.682171	0.124788	1.5241	1.51074	0.485684	-0.157464	-3.2679	26.1779	26.431	26.289	26.3904	26.3847	26.4972	26.2051	26.3077	26.2871
A0A0D9SFL3;B0QYK0;C9JGE3;Q01844;H7BY36	A0A0D9SFL3;B0QYK0;C9JGE3;Q01844;H7BY36	RNA-binding protein EWS	EWSR1			7.2	61.414	0.308593	0.879265	-0.0534897	-0.756672	0.315488	0.820148	0.110626	0.771177	26.9577	26.885	26.8646	26.931	26.8947	26.721	27.1742	26.7314	26.973
B3KTT6;A0A0D9SFP2;A0A140VK76;Q16836;B2RB06;E9PF18;A0A1W2PNM1;A0A0A0MSE2;A0A1W2PQ78;A0A1W2PQV5;A0A1W2PQC2;A0A1W2PRT2;A0A1W2PQ55;A0A1W2PP40	B3KTT6;A0A0D9SFP2;A0A140VK76;Q16836;B2RB06;E9PF18;A0A1W2PNM1;A0A0A0MSE2;A0A1W2PQ78;A0A1W2PQV5	Hydroxyacyl-coenzyme A dehydrogenase, mitochondrial	HADH			48.1	35.22	1.77811	0.407495	0.389317	3.96068	0.374469	0.805081	0.115067	0.893242	25.4837	25.3958	25.6127	25.7923	26.0359	25.8319	26.1984	25.9643	25.8426
A0A1B0GWF2;A0A1B0GVQ5;A0A2R8Y5D4;A0A0D9SG72;A0A1B0GTP9;P61764;B7Z2V7;B7Z1V5;Q59GC9;B7Z3F4;A0A1B0GW76;A0A0D9SEH5;A0A0D9SFQ7;A0A0D9SFW6;A0A1B0GTD8;A0A0D9SEP9;A0A1B0GVV9;A0A096LP52	A0A1B0GWF2;A0A1B0GVQ5;A0A2R8Y5D4;A0A0D9SG72;A0A1B0GTP9;P61764;B7Z2V7;B7Z1V5;Q59GC9;B7Z3F4	Syntaxin-binding protein 1	STXBP1			32.6	65.215	1.0812	0.530875	0.174582	2.29992	0.245875	0.852493	-0.0552705	-0.621886	26.6902	26.732	26.7934	26.7773	27.0086	26.9534	26.7705	26.9597	26.8433
A0A0D9SG77;A0A1B0GVL3;Q9H2G0;Q05086;Q5W7F7;Q9BUI6;Q96GR7;A0A0D9SF91;A0A0D9SG63;A0A0D9SES7;S4R306	A0A0D9SG77;A0A1B0GVL3;Q9H2G0;Q05086;Q5W7F7;Q9BUI6;Q96GR7	Ubiquitin-protein ligase E3A	UBE3A			20.5	88.082	0.0764656	0.972657	-0.0144558	-0.217366	1.01059	0.548009	0.0775725	2.15355	25.8362	25.9498	25.7498	25.8947	25.8108	25.7869	25.8788	25.9178	25.9286
A0A0D9SGE8;Q8IWS0;Q5JRC6;B4E138	A0A0D9SGE8;Q8IWS0;Q5JRC6;B4E138	PHD finger protein 6	PHF6			16.4	41.361	0.42714	0.810373	0.507209	0.999793	0.331946	0.814007	0.0443821	0.805584	25.4434	26.9468	26.9785	26.9079	27.006	26.9764	26.919	27.0779	27.0266
A0A0F7KYT8;A0A0F7L0Q8;B4DXZ6;A0A0F7L1S3;P51114;B4DM78;E9PFF5;B4DM21;E7EU85;B4DGH9;C9JAJ4;Q14341;C9JY20;H7C4S4	A0A0F7KYT8;A0A0F7L0Q8;B4DXZ6;A0A0F7L1S3;P51114;B4DM78;E9PFF5;B4DM21;E7EU85	Fragile X mental retardation syndrome-related protein 1	FXR1			16.5	76.199	0.202153	0.913413	-0.0598736	-0.524213	0.714238	0.629722	-0.120743	-1.56299	25.0087	24.94	25.302	25.0241	25.0701	24.9769	25.0025	24.9443	24.7621
A0A0F7NGI8;Q32MZ4;B4DPC0;Q05D04	A0A0F7NGI8;Q32MZ4;B4DPC0;Q05D04	Leucine-rich repeat flightless-interacting protein 1	LRRFIP1			4.7	82.688	0.447102	0.808215	0.106771	1.03971	0.0216346	0.989491	0.0157102	0.0648502	23.2942	23.273	23.511	23.3283	23.5297	23.5405	23.0189	23.682	23.7448
A0RZB8;A0A140T8Z0;Q6URC4;A0A0G2JH68;O60610;H9KV28;A0A1E1ERW3;A0A2R8Y5N1;B4DVR3;Q96IL1;Q7KZJ7;H7C2W8;B4E2I7;Q6UUU0;A0RZB7;A0A2R8YEF8	A0RZB8;A0A140T8Z0;Q6URC4;A0A0G2JH68;O60610;H9KV28;A0A1E1ERW3;A0A2R8Y5N1;B4DVR3;Q96IL1;Q7KZJ7	Protein diaphanous homolog 1	DIAPH1			14.6	140.17	0.234172	0.905961	-0.062254	-0.596081	0.219986	0.865815	-0.075496	-0.564478	26.4968	26.3522	26.5078	26.5038	26.2087	26.4575	26.1286	26.3566	26.4582
A8K5I0;A0A0G2JIW1;P0DMV9;P0DMV8;A0A1U9X7W4;Q59EJ3;B4DI39;B4DWK5;B4DFN9;B4DNT8;B4E1S9;B4DVU9;B4E388;V9GZ37;B3KTT5;B4DNX1;B4E1T6;Q9UQC1;B4DNV4	A8K5I0;A0A0G2JIW1;P0DMV9;P0DMV8;A0A1U9X7W4;Q59EJ3;B4DI39;B4DWK5;B4DFN9;B4DNT8;B4E1S9;B4DVU9;B4E388;V9GZ37;B3KTT5;B4DNX1	Heat shock 70 kDa protein 1B;Heat shock 70 kDa protein 1A	HEL-S-103;HSPA1B;HSPA1A			64.3	70.051	0.440519	0.805762	0.119805	1.02657	0.456936	0.758652	0.108487	1.0593	30.587	30.2649	30.483	30.4345	30.5965	30.6633	30.6425	30.5586	30.8187
A0A1U9X777;A0A0G2JJD3;O95870;B3KNX9;A8K0A4;A0A0G2JI89;F2Z3H2	A0A1U9X777;A0A0G2JJD3;O95870;B3KNX9;A8K0A4	Abhydrolase domain-containing protein 16A	ABHD16A;BAT5			18.8	63.243	1.1506	0.535976	-0.0768312	-2.44669	1.30502	0.492065	0.0734317	2.78543	23.923	24.0173	24.0092	23.9156	23.8891	23.9143	24.0096	23.9995	23.9303
A0A0G2JN29;J3KN36;A0A087X117;Q15155;P69849;Q5JPE7;A0A0G2JP90;A0A087WW46;Q1LZN2;Q9H049;A0A087WTD5;H3BUC9;H3BPS9;I3L0Q6;H3BTW1	A0A0G2JN29;J3KN36;A0A087X117;Q15155;P69849;Q5JPE7;A0A0G2JP90;A0A087WW46;Q1LZN2	Nodal modulator 1;Nodal modulator 3;Nodal modulator 2	NOMO3;NOMO1;NOMO2			25.1	139.54	0.438228	0.807689	-0.0725498	-1.02199	1.05064	0.535614	0.216973	2.23623	27.0614	26.9356	27.0343	26.8348	27.0421	26.9367	27.0847	27.0724	27.3075
A0A0G2JNZ2;A0A0G2JPP5;Q14160;A0A0G2JMS7;A0PJK8;H0YCG0;H0YDF9;Q5T0G3;A8K883;Q9BTT6	A0A0G2JNZ2;A0A0G2JPP5;Q14160;A0A0G2JMS7;A0PJK8	Protein scribble homolog	SCRIB			10.7	174.91	2.42634	0.329103	-0.228951	-6.05848	0.036152	0.977879	-0.018411	-0.106749	25.3615	25.4292	25.4392	25.1348	25.1741	25.2341	25.4098	25.2413	24.8367
Q6ZT60;B7Z2X0;A0A0G2JQ41;B7Z7Z1;A0A1C7CYZ0;Q12979;A0A0G2JRJ1;I3L3W0;I3L2P5;I3NI05;B7Z683	Q6ZT60;B7Z2X0;A0A0G2JQ41;B7Z7Z1;A0A1C7CYZ0;Q12979;A0A0G2JRJ1;I3L3W0;I3L2P5;I3NI05;B7Z683	Active breakpoint cluster region-related protein	ABR			5.8	41.155	0.00320657	1	0.000761668	0.00980846	1.00023	0.551316	0.114304	2.13232	23.5353	23.399	23.338	23.5183	23.3416	23.4145	23.5466	23.5091	23.5617
A0A0G2JRI7;D3DTC2;A0A0G2JQ62;Q8NF37	A0A0G2JRI7;D3DTC2;A0A0G2JQ62;Q8NF37	Lysophosphatidylcholine acyltransferase 1	AYTL2;LPCAT1			14.1	25.74	0.182309	0.921195	0.0513363	0.478629	0.0120843	0.993244	0.0094827	0.0365989	24.1831	24.3122	24.5323	24.329	24.4404	24.4122	23.8897	24.6718	24.6486
A0A0J9YVP6;A0A0J9YYL3;A0A0J9YXX5;Q9UHX1;A0A0J9YXJ8;A0A0J9YVR6;E9PQ56;A0A0J9YWM1;H0YEM1;E9PN18;E9PMU7;H0YCP8;E9PL19	A0A0J9YVP6;A0A0J9YYL3;A0A0J9YXX5;Q9UHX1;A0A0J9YXJ8;A0A0J9YVR6;E9PQ56;A0A0J9YWM1;H0YEM1	Poly(U)-binding-splicing factor PUF60	PUF60			52.4	57.398	0.362801	0.856997	0.0752869	0.869352	0.120513	0.929313	0.0381718	0.330396	27.9607	27.8069	27.8388	27.8229	28.0746	27.9348	28.1616	27.8917	27.8934
J3QT77;A0A0J9YYG4;B4DKM6;B4DW02;A0A0J9YXF2;Q15165;A0A0J9YYJ1	J3QT77;A0A0J9YYG4;B4DKM6;B4DW02;A0A0J9YXF2;Q15165	Serum paraoxonase/arylesterase 2	PON2			12.9	37.98	0.106224	0.955312	0.139592	0.294503	0.00834514	0.994322	-0.0028127	-0.0253793	23.7314	22.1795	23.3873	23.1337	23.3292	23.2541	23.0851	23.2117	23.4117
A0A0K0K1H7;A2A274;Q99798;B4DZ08;B2RBW5;B4DLY4;B4DJW1;Q71UF1;B4DEC3;B4DW08;O75944	A0A0K0K1H7;A2A274;Q99798;B4DZ08;B2RBW5;B4DLY4;B4DJW1;Q71UF1;B4DEC3;B4DW08	Aconitate hydratase, mitochondrial	ACO2			38.2	85.564	0.356522	0.855905	0.0493673	0.856449	0.394371	0.794339	0.0444349	0.933735	28.6014	28.7144	28.5943	28.6074	28.7534	28.6975	28.7125	28.706	28.7731
Q05DH1;A0A0K0K1K4;O14818;H0UI83;H0Y586;B0YJ74;Q8TAA3;A0A087WYS6;F5GY34;Q4G1B8	Q05DH1;A0A0K0K1K4;O14818;H0UI83;H0Y586	Proteasome subunit alpha type;Proteasome subunit alpha type-7	PSMA7;hCG_41772			55.9	26.713	0.301132	0.880111	0.0847747	0.740913	0.830669	0.600304	0.162955	1.79155	27.817	27.4692	27.6584	27.6335	27.8218	27.7436	27.7737	27.8888	28.0253
A0A0K0K1K7;O95336;M0R1L2;M0R261;M0R0U3	A0A0K0K1K7;O95336;M0R1L2;M0R261;M0R0U3	6-phosphogluconolactonase	PGLS			38.8	27.547	1.11602	0.527209	0.336325	2.37318	0.423878	0.776024	-0.245815	-0.993247	24.1301	24.05	24.2582	24.2488	24.5083	24.6902	24.6589	23.9977	24.0533
A0A384NQ35;Q6FHU3;A0A0K0K1L8;Q06323;Q86SZ9;H0YKK6;H0YLU2	A0A384NQ35;Q6FHU3;A0A0K0K1L8;Q06323	Proteasome activator complex subunit 1	PSME1			43.7	28.52	1.54513	0.461039	0.41275	3.35252	1.59728	0.461493	0.366715	3.48328	26.5247	26.3088	26.5221	26.6922	27.0393	26.8624	27.2454	27.279	27.1697
A0A0M3HER1;P48059;B3KNZ3;A0A0J9YXC7	A0A0M3HER1;P48059	LIM and senescent cell antigen-like-containing domain protein 1	LIMS1			10	24.307	0.559116	0.751633	-1.29029	-1.26057	0.13335	0.921284	0.441429	0.362074	25.2879	25.3904	24.8002	25.4603	24.1437	22.0036	24.8418	22.9478	25.1422
A0A0S2A4E4;A0A0M4G3H8;P35573;G1UI17;A0A1C7CYW1	A0A0S2A4E4;A0A0M4G3H8;P35573;G1UI17	Glycogen debranching enzyme;4-alpha-glucanotransferase;Amylo-alpha-1,6-glucosidase	AGL			16.8	174.76	0.714456	0.675001	-0.0578588	-1.56342	0.0490363	0.969091	0.0184956	0.142964	26.3002	26.3386	26.2336	26.2134	26.2743	26.2112	26.0711	26.4983	26.185
B7Z5E0;A0A494C0F8;B1APY9;A0A494C147;B1APY8;A0A0R4J2E6;P26378;A0A494C015;A0A494C1D9;A0A494C173;A0A494C0Q5;A0A494C0M6;A0A494C011;A0A494BZW4	B7Z5E0;A0A494C0F8;B1APY9;A0A494C147;B1APY8;A0A0R4J2E6;P26378;A0A494C015;A0A494C1D9;A0A494C173	ELAV-like protein;ELAV-like protein 4	ELAVL4			48.5	36.847	0.074341	0.973921	-0.0213865	-0.211724	0.114735	0.931651	-0.0330671	-0.315965	27.9517	27.8859	27.8069	27.9586	27.6764	27.9454	27.7292	27.8939	27.858
A0A0R4J2E8;A8MXP9;P43243;Q68D11;D6REM6;D6R991;Q5CZA7;B3KM87;B4DRS1;B4DF66;H0Y8T4;Q9H4N1;D6R8Z5;Q68E03;D6RCM3;D6REK4;D6RBK5;D6RB45;A0A1B0GX04;D6R9F3;D6RBS2;D6RBI2;D6RE02;D6RIA2;D6RAM9;D6RAY2	A0A0R4J2E8;A8MXP9;P43243;Q68D11;D6REM6;D6R991	Matrin-3	MATR3;DKFZp686K23100			55.8	94.622	0.8395	0.634016	-0.154613	-1.80903	0.183655	0.892687	-0.0420837	-0.481748	31.2424	31.4533	31.4313	31.3105	31.1265	31.2261	31.0603	31.1762	31.3003
A0A0S2Q0B1;O14497;H0Y488;A0A1B0GTU5;Q4LE49;Q8NC65;A0A087WUV6;Q96TA9;Q96SM7;Q96T01;Q96SY8;A4FU79;H0YEW5;H0YCU6	A0A0S2Q0B1;O14497;H0Y488;A0A1B0GTU5	AT-rich interactive domain-containing protein 1A	ARID1A			36.1	242.06	0.63021	0.718522	-0.100852	-1.39925	1.46404	0.480965	-0.192298	-3.15487	29.9066	30.0623	29.9679	29.9713	29.7775	29.8854	29.6605	29.6633	29.7335
A0A0S2Z2Z3;O75027;B4DGL8;A0A087WW65;B3KM98;A0A2R8Y473;A0A0S2Z367;A0A0S2Z2W5;E9PJR8	A0A0S2Z2Z3;O75027;B4DGL8;A0A087WW65;B3KM98;A0A2R8Y473	ATP-binding cassette sub-family B member 7, mitochondrial	ABCB7			18.2	82.768	0.557089	0.752267	-0.104517	-1.25661	0.25774	0.849373	-0.100429	-0.647819	25.5744	25.6715	25.7602	25.6511	25.4404	25.6011	25.1901	25.5389	25.6623
A0A0S2Z2Z6;P08133;A0A0S2Z377;A8K3Q7;B7Z582;E5RK69;Q6ZP35;E7EMC6;A0A0S2Z301;E5RJF5;E5RK63;E5RFF0;E5RI05;E5RJR0;E5RIU8;H0YC77	A0A0S2Z2Z6;P08133;A0A0S2Z377;A8K3Q7;B7Z582;E5RK69;Q6ZP35;E7EMC6	Annexin A6;Annexin	ANXA6			69.1	75.872	0.20929	0.908071	-0.0351232	-0.540403	0.460937	0.75734	-0.0505594	-1.06725	30.5609	30.3825	30.4109	30.4782	30.3607	30.4101	30.3947	30.3001	30.4025
B7Z9I1;A0A0S2Z366;Q5T4U5;P11310;B4DWX6;Q5HYG7;B4DVB1;B4DVE0;B4DJE7;A0A0S2Z3A5;E9PJM9;H0YDT5;E9PRX4	B7Z9I1;A0A0S2Z366;Q5T4U5;P11310;B4DWX6;Q5HYG7;B4DVB1;B4DVE0;B4DJE7	Medium-chain specific acyl-CoA dehydrogenase, mitochondrial	ACADM;DKFZp686M24262			50.6	42.426	0.586298	0.751136	-0.151952	-1.31366	0.799788	0.598299	0.320859	1.73062	27.2664	27.1633	26.9641	26.8997	27.1276	26.9107	27.0342	27.25	27.6163
A0A0S2Z3I6;A0A0S2Z392;P25098;Q59F73	A0A0S2Z3I6;A0A0S2Z392;P25098;Q59F73	Beta-adrenergic receptor kinase 1	ADRBK1			4.8	77.437	0.742098	0.660063	0.0791664	1.61743	0.893404	0.587077	0.117057	1.91627	23.1728	23.1071	23.0569	23.1261	23.2487	23.1996	23.2222	23.394	23.3094
A0A0S2Z3C9;P41212;A0A0S2Z3N6;H2BNB9;H0YG25	A0A0S2Z3C9;P41212;A0A0S2Z3N6;H2BNB9	Transcription factor ETV6	ETV6			11.3	52.999	0.95594	0.587333	-0.315937	-2.04211	0.543476	0.706714	0.111971	1.22996	24.8639	25.1537	24.6908	24.6757	24.6482	24.4367	24.6148	24.6912	24.7905
D6REC6;D6R9G1;A0A0S2Z3F9;P50613;D6RAD4	D6REC6;D6R9G1;A0A0S2Z3F9;P50613;D6RAD4	Cyclin-dependent kinase 7	CDK7			18.1	17	0.257873	0.899384	-0.300818	-0.648109	0.261217	0.84756	-0.324747	-0.655378	23.2781	23.6197	23.4207	23.3689	22.2639	23.7833	22.4289	23.0989	22.914
A0A0S2Z3G9;O43707;Q96BG6;F5GXS2;B4E337;H7C144;B4DSX0;A0A0S2Z3X3;A0A0S2Z3C0;K7EP19;B3W6H4	A0A0S2Z3G9;O43707;Q96BG6;F5GXS2	Alpha-actinin-4	ACTN4			66.8	104.85	0.329525	0.864909	0.0467593	0.800542	0.440037	0.766132	0.109917	1.02561	30.7267	30.8585	30.8016	30.9151	30.7625	30.8495	30.7782	30.9627	31.1159
A0A0S2Z3H2;A0A0S2Z3H6;O96005;K7EQQ1;K7ERL5	A0A0S2Z3H2;A0A0S2Z3H6;O96005	Cleft lip and palate transmembrane protein 1	CLPTM1			9.4	76.096	0.59216	0.746212	0.107338	1.32509	0.348587	0.809533	-0.0915349	-0.84009	24.4595	24.2216	24.3088	24.3556	24.4645	24.4919	24.3158	24.1883	24.5332
A0A0S2Z3H3;P12235;A8K787;V9GYG0;A0A0S2Z3C4;A0A0S2Z359;Q59EP7	A0A0S2Z3H3;P12235;A8K787;V9GYG0;A0A0S2Z3C4;A0A0S2Z359	ADP/ATP translocase 1	SLC25A4			52.7	33.064	0.598741	0.738441	-0.109789	-1.33793	0.519257	0.717419	-0.111649	-1.18245	25.3926	25.544	25.5732	25.496	25.2882	25.3963	25.3842	25.3207	25.1407
A0A0S2Z3H8;P63092;Q5JWF2;B0AZR9;Q5FWY2;A0A0S2Z3S5;Q14455;A0A0A0MR13;S4R3E3;O60726;Q5JWE9;H0Y7F4;O75633;Q5JWD1;O75632;H0Y7E8;S4R3V9;Q8N2B4;A8K1Y9;P38405;A0A1W2PRE1;A2A2R6;A0A1W2PQK2;A0A087WTB6;A0A087WZE5;B4DHG7	A0A0S2Z3H8;P63092;Q5JWF2;B0AZR9;Q5FWY2;A0A0S2Z3S5;Q14455	Guanine nucleotide-binding protein G(s) subunit alpha isoforms short;Guanine nucleotide-binding protein G(s) subunit alpha isoforms XLas	GNAS;GSA			37.6	45.664	0.644665	0.709087	0.16942	1.4274	0.467244	0.753956	0.12535	1.07978	27.3275	27.3284	27.197	27.6705	27.309	27.3817	27.5804	27.6407	27.5162
Q5T081;A0A0S2Z3I4;A0A0S2Z404;P18754;C9JW69;C9JRH2;C9J3R0;C9JMJ4;C9JQZ4	Q5T081;A0A0S2Z3I4;A0A0S2Z404;P18754;C9JW69;C9JRH2;C9J3R0;C9JMJ4;C9JQZ4	Regulator of chromosome condensation	RCC1			30.4	44.969	0.60269	0.737157	-0.208143	-1.34563	0.660345	0.657782	-0.311555	-1.45793	26.4549	26.6179	26.604	26.4257	26.0696	26.5571	26.3125	25.7708	26.0344
A0A0S2Z3L0;P13804;H0YL12;A0A0S2Z3M4;H0YK49;H0YLU7;H0YNX6;H0YKF0;H0YL83	A0A0S2Z3L0;P13804;H0YL12;A0A0S2Z3M4;H0YK49;H0YLU7;H0YNX6;H0YKF0	Electron transfer flavoprotein subunit alpha, mitochondrial	ETFA			29.1	35.079	0.0562654	0.9802	0.0300077	0.162914	0.0167309	0.98885	0.00924746	0.0504156	25.2543	24.6343	25.0107	24.9977	25.0606	24.9309	25.1106	24.6558	25.2506
A0A0S2Z3L2;P16615;H7C5W9;Q8N3X5;Q7Z675;O14983;Q7Z6E5;A8K9K1;Q93084;B3KS35;J3QSY6;A0A0S2Z3H0;A0A0S2Z425;H3BVB2;A0A0C4DH86;B1PM99;H3BTW4	A0A0S2Z3L2;P16615;H7C5W9	Sarcoplasmic/endoplasmic reticulum calcium ATPase 2	ATP2A2			42.7	114.76	0.382821	0.840035	0.0531915	0.910273	0.885538	0.580874	0.0969429	1.90056	29.7121	29.8319	29.8416	29.7862	29.9258	29.8333	30.0057	29.9208	29.9096
A0A0S2Z3L7;Q9BVJ8;H3BS10;A0A0S2Z3W3;H3BP20;B4DVA7;P06865;B4DVL8;G3XL79;A0A0S2Z3X0;H3BU85;H3BTD4	A0A0S2Z3L7;Q9BVJ8;H3BS10;A0A0S2Z3W3;H3BP20;B4DVA7;P06865;B4DVL8	Beta-hexosaminidase;Beta-hexosaminidase subunit alpha	HEXA			9.9	39.679	0.779822	0.646648	0.75426	1.69137	0.254348	0.852065	-0.290432	-0.640429	23.2455	22.8703	21.8086	23.2314	23.6224	23.3333	23.9771	22.745	22.5937
A0A0S2Z3P9;P45954	A0A0S2Z3P9;P45954	Short/branched chain specific acyl-CoA dehydrogenase, mitochondrial	ACADSB			10.2	47.485	0.230369	0.905765	-0.31426	-0.587644	0.00352369	0.997893	0.00700823	0.0107746	23.495	23.3648	23.5532	23.831	22.1071	23.5321	23.4299	22.4245	23.6368
A0A0S2Z3W7;Q9BY32;A0A0S2Z423;Q5NT82	A0A0S2Z3W7;Q9BY32;A0A0S2Z423	Inosine triphosphate pyrophosphatase	ITPA			54.1	21.445	0.290409	0.888566	0.0342833	0.718144	0.405842	0.787118	-0.0681883	-0.95694	26.1903	26.244	26.3323	26.2534	26.3345	26.2817	26.3344	26.2285	26.102
A0A0S2Z3X8;P31150;B4DHX4;B4E070;B4DH24;G5E9U5;A0A0S2Z426	A0A0S2Z3X8;P31150;B4DHX4	Rab GDP dissociation inhibitor alpha	GDI1			66	50.582	0.270015	0.898313	0.081295	0.674423	0.131405	0.921052	0.0305354	0.357308	29.6974	29.3917	29.5486	29.4738	29.653	29.7547	29.6808	29.6104	29.6821
B4DVE1;A0A0S2Z3Y1;Q08380;B4DI70;B4DWA8;B3KP88;B4DDG4;K7EJY8;K7ESM3;K7EKQ5;K7EP36	B4DVE1;A0A0S2Z3Y1;Q08380;B4DI70;B4DWA8;B3KP88;B4DDG4	Galectin-3-binding protein	LGALS3BP			6.8	64.096	1.02409	0.552668	0.238962	2.18133	0.801199	0.600545	-0.952438	-1.7334	23.3327	23.4171	23.2852	23.716	23.3821	23.6538	23.2108	23.1309	21.5529
A0A0S2Z469;B5MC53;B5MCF8;A0A0S2Z3Z9;P39210;G5E9F5;C9J473;H0Y6M5;E7EX18;A8MPV4	A0A0S2Z469;B5MC53;B5MCF8;A0A0S2Z3Z9;P39210;G5E9F5;C9J473;H0Y6M5;E7EX18	Protein Mpv17	MPV17			38.1	16.022	0.0086524	0.998088	-0.00507228	-0.0263048	0.522716	0.714582	0.199549	1.18925	25.1715	25.4639	25.6333	25.4564	25.6348	25.1622	25.7375	25.4282	25.6865
A0A0S2Z410;Q99714;Q5H928;A0A0S2Z434	A0A0S2Z410;Q99714;Q5H928;A0A0S2Z434	3-hydroxyacyl-CoA dehydrogenase type-2	HSD17B10			89.3	26.923	0.300733	0.879472	0.0267658	0.740068	0.113578	0.932768	0.0309251	0.313062	28.8874	28.9362	28.9987	28.9644	28.9974	28.9407	29.193	28.9098	28.8925
Q6IB91;A0A384MTT2;A0A0S2Z430;Q16822;H0YML5;A0A0S2Z451;H0YM31;A0A0A0MS74;A0A0S2Z4C0;H0YNG4;H0YMU6;H0YMA5	Q6IB91;A0A384MTT2;A0A0S2Z430;Q16822;H0YML5;A0A0S2Z451;H0YM31;A0A0A0MS74	Phosphoenolpyruvate carboxykinase [GTP], mitochondrial	PCK2			24.5	70.696	0.313813	0.874502	-0.066747	-0.767658	2.19427	0.381538	0.222423	5.22778	26.3694	26.6095	26.6245	26.4148	26.5038	26.4846	26.6795	26.6393	26.7516
A0A0S2Z489;O00232;A0A0S2Z476;J3KTJ5;J3KSK1	A0A0S2Z489;O00232;A0A0S2Z476	26S proteasome non-ATPase regulatory subunit 12	PSMD12			50.9	52.904	1.39597	0.500444	0.112577	2.99393	0.438338	0.765766	0.049305	1.02221	27.9422	27.8226	27.9175	27.9973	27.9974	28.0252	28.1448	27.9832	28.04
A0A0S2Z4G7;A0A0S2Z491;P06748;A0A140VJQ2;A4ZU86;Q9BTI9;Q9NX34;E5RI98;V9HVU7;A0A024RAP1;A0A024R3V9;E5RGW4	A0A0S2Z4G7;A0A0S2Z491;P06748;A0A140VJQ2;A4ZU86;Q9BTI9	Nucleophosmin	NPM1			68.3	29.464	0.950225	0.586176	0.167452	2.03054	0.656903	0.656526	0.134103	1.45123	30.7482	30.6242	30.6855	30.7126	30.8827	30.9649	31.0959	30.9489	30.9177
B2RBA6;A0A0S2Z4A5;P33993;C6EMX8;B3KUD7;B4DDF5;Q9H4N9;A0A0S2Z441;C9J8M6	B2RBA6;A0A0S2Z4A5;P33993;C6EMX8;B3KUD7;B4DDF5;Q9H4N9	DNA helicase;DNA replication licensing factor MCM7	MCM7			50.5	81.279	0.371689	0.845001	-0.0606963	-0.887561	0.961677	0.569407	-0.148033	-2.05374	29.443	29.3874	29.4354	29.4882	29.2657	29.3299	29.177	29.2698	29.1929
A0A0S2Z4B5;A0A0S2Z4C6;Q08209;E7ETC2;Q9UMM5;E9PPC8;E9PK68;B7Z781;Q9UMB2;H0YC26;P48454	A0A0S2Z4B5;A0A0S2Z4C6;Q08209;E7ETC2;Q9UMM5	Serine/threonine-protein phosphatase 2B catalytic subunit alpha isoform;Serine/threonine-protein phosphatase	PPP3CA			17.6	57.658	0.502762	0.783373	0.11215	1.15	0.443592	0.763958	0.124006	1.03271	26.6153	26.5156	26.4618	26.501	26.6284	26.7997	26.649	26.7244	26.9277
Q6IAQ2;A0A0S2Z4B7;Q99643;D3DVH1;A0A0S2Z4C9;B4DEL5;D6RBX6;A0A0S2Z4B0;A0A0S2Z4B6	Q6IAQ2;A0A0S2Z4B7;Q99643;D3DVH1;A0A0S2Z4C9;B4DEL5	Succinate dehydrogenase cytochrome b560 subunit, mitochondrial	SDHC			17.8	18.602	0.216264	0.907571	-0.352443	-0.556124	0.284536	0.839979	0.549349	0.705612	27.4002	25.8552	25.8506	25.3234	26.5789	26.1464	25.1973	27.1635	27.3359
A0A0S2Z4C3;P07954;A0A0S2Z3X6;A0A0S2Z4H0;A0A0S2Z3S9;A0A0S2Z3W2;A0A0S2Z408	A0A0S2Z4C3;P07954	Fumarate hydratase, mitochondrial	FH			51.8	54.636	0.474387	0.792495	0.0830205	1.09394	0.424136	0.775701	-0.0967286	-0.993766	27.8376	27.6738	27.7552	27.9463	27.8279	27.7415	27.6308	27.7046	27.8901
Q5HYB6;B2RDE1;A0A0S2Z4G4;A0A087WWU8;A0A0S2Z4I4;A0A0S2Z4G8;Q8NAG3;B4DWT5;D6R904;B4DQ80;A0A494C0G0;Q8NI98;Q6LDX7;Q5VU61;Q8TCG4;C9IZA2;H0YNC7;Q8NAH0;Q15657;Q1ZYL5;F5H7S3;D9YZV7;H7BYY1;H0YKJ4;H0YK48;B7Z722;A0A494BZZ2;B7Z596;D9YZV5;D9YZV4;A0A0S2Z4G6;A0A0K0K1I0;A0A024R5W6;Q59GR8;Q6ZN40;P09493;H0YL80;A0A024R4K5;K7EP68;H0YKX5;H0YKP3;Q5VU62;K7ERG3;A0A494C034;U3KQK2;A0A2R8Y6A3;A0A494C0I0;A0A494C0V8	Q5HYB6;B2RDE1;A0A0S2Z4G4;A0A087WWU8;A0A0S2Z4I4;A0A0S2Z4G8;Q8NAG3;B4DWT5;D6R904		DKFZp686J1372;TPM3			66.8	27.175	2.42608	0.318133	0.654195	6.0575	1.07783	0.530188	0.303629	2.29287	28.3972	28.4026	28.4144	28.906	29.2672	29.0036	29.212	29.4641	29.4116
B2R659;A0A0S2Z4J1;P51659;A0A2R8YD50;E7EWE5;B4DSD0;B4DDM5;A0A2R8Y7L2;G5E9S2;E7ET17;E7ER27;B3KSP2;Q59H27;E7EPL9;A0A2R8YDT8;A0A2R8YF45;A0A2R8Y7W2;A0A0S2Z460;A0A0S2Z4Q6;A0A2R8YF39;A0A2R8YEG2;Q9UBA4	B2R659;A0A0S2Z4J1;P51659;A0A2R8YD50;E7EWE5;B4DSD0;B4DDM5;A0A2R8Y7L2;G5E9S2;E7ET17;E7ER27;B3KSP2;Q59H27;E7EPL9	Peroxisomal multifunctional enzyme type 2;(3R)-hydroxyacyl-CoA dehydrogenase;Enoyl-CoA hydratase 2	HSD17B4			54.5	79.611	0.29832	0.883052	0.0506585	0.734956	0.373702	0.803832	-0.055624	-0.891674	30.2821	30.2026	30.3138	30.2197	30.4278	30.3028	30.2493	30.2426	30.2915
Q6UWH2;A0A0S2Z4J3;O14521;H0YD96;H0YD41;G3V173;E9PK73;H3BRW5	Q6UWH2;A0A0S2Z4J3;O14521;H0YD96;H0YD41;G3V173;E9PK73;H3BRW5	Succinate dehydrogenase [ubiquinone] cytochrome b small subunit, mitochondrial	UNQ5809;SDHD			11.3	17.014	0.471435	0.794829	-1.00963	-1.08809	0.0217604	0.989427	0.0846367	0.0652186	24.5003	24.4063	24.5214	24.5721	21.6242	24.2028	21.7351	24.4625	24.4554
B2R6D4;A0A291FGD1;A0A0S2Z4J6;O15305;B7Z3M6;H3BRM0;H3BR08;H3BM92;H3BV34;H3BT06;H3BNY9;H3BPH4;H3BV55;B7Z922;B7Z419;B7Z6A1;Q59F02	B2R6D4;A0A291FGD1;A0A0S2Z4J6;O15305;B7Z3M6;H3BRM0;H3BR08;H3BM92;H3BV34;H3BT06;H3BNY9;H3BPH4;H3BV55	Phosphomannomutase;Phosphomannomutase 2	PMM2			21.5	28.054	1.03413	0.54919	1.78904	2.20203	0.232382	0.858733	0.152943	0.592113	22.0787	22.1462	24.4928	24.5999	25.0315	24.4534	25.2027	24.7948	24.5462
B4E1N6;H7C155;B4E0X2;A0A0S2Z4L5;L7RRS6;A0A0S2Z559;D7PBN3;P04049;C7TPG7	B4E1N6;H7C155;B4E0X2;A0A0S2Z4L5;L7RRS6;A0A0S2Z559;D7PBN3;P04049;C7TPG7	RAF proto-oncogene serine/threonine-protein kinase	RAF1;SRGAP3:RAF1			23.6	48.921	2.04583	0.353333	-3.55302	-4.74583	2.3658	0.423667	2.41556	5.83206	25.0162	23.887	26.2651	21.6014	20.9449	21.9629	23.3553	24.0989	24.3017
A0A0S2Z4P0;P50479;A0A0S2Z4N4	A0A0S2Z4P0;P50479;A0A0S2Z4N4	PDZ and LIM domain protein 4	PDLIM4			15.8	30.189	0.404235	0.822179	0.159835	0.953695	0.153794	0.909238	0.060044	0.411517	24.2168	24.1168	24.4851	24.24	24.671	24.3871	24.5719	24.3475	24.5589
A0A0S2Z4R1;P54577;A0A0C4DGZ5;A0A0S2Z4P3	A0A0S2Z4R1;P54577;A0A0C4DGZ5	Tyrosine--tRNA ligase, cytoplasmic;Tyrosine--tRNA ligase, cytoplasmic, N-terminally processed;Tyrosine--tRNA ligase	YARS			45.6	59.143	0.160923	0.933005	-0.0270901	-0.428488	0.779594	0.602092	0.13055	1.69092	28.6403	28.5695	28.6553	28.4929	28.6917	28.5992	28.7313	28.6328	28.8113
B4E1E2;A0A0S2Z4R4;O14964;A0A0S2Z4Q4;B4DFP5;I3L1P5;I3L165;I3L1E3;I3L2H4	B4E1E2;A0A0S2Z4R4;O14964;A0A0S2Z4Q4;B4DFP5	Hepatocyte growth factor-regulated tyrosine kinase substrate	HGS			17.9	74.854	1.1835	0.535696	0.137738	2.51739	1.26851	0.495804	0.287855	2.70369	26.3327	26.3469	26.2757	26.486	26.5243	26.3583	26.5667	26.7792	26.8862
B2R7C5;A0A0S2Z4T1;P25205;A0A0S2Z492;Q8NHX6;J3KQ69;A0A499FHX9;B4DUQ9;B4DS46;Q7Z6P5	B2R7C5;A0A0S2Z4T1;P25205;A0A0S2Z492;Q8NHX6;J3KQ69;A0A499FHX9;B4DUQ9;B4DS46	DNA helicase;DNA replication licensing factor MCM3	MCM3;HCC5			51	91.008	0.0538032	0.981656	-0.00965945	-0.156148	0.255905	0.850192	-0.0404326	-0.643823	29.4755	29.4599	29.4292	29.4994	29.3247	29.5115	29.3805	29.4384	29.3954
A0A0S2Z4V6;O76024;H0Y9G5;B4DJ99;A0A0E3H6T4	A0A0S2Z4V6;O76024;H0Y9G5	Wolframin	WFS1			14.6	100.29	0.583902	0.7507	-0.16087	-1.30898	0.561237	0.693237	-0.536933	-1.26472	24.8634	24.5765	24.9025	24.7349	24.6233	24.5015	23.2504	24.5843	24.4142
A0A0S2Z4W1;A9Z1X7;B7Z7U0;A0A0S2Z4Z6;Q8IYB3;E9PCT1;M0R1E7;M0R088;M0QXG5;B4DED5	A0A0S2Z4W1;A9Z1X7;B7Z7U0;A0A0S2Z4Z6;Q8IYB3;E9PCT1	Serine/arginine repetitive matrix protein 1	SRRM1			11	102.33	2.17509	0.345633	-0.588918	-5.16347	0.277504	0.838771	-0.466918	-0.690544	24.2376	24.2115	24.2121	23.7295	23.4047	23.7602	23.5702	21.862	24.0614
A0A0S2Z4W4;Q7Z3D7;P98175;A0A0S2Z4X1;Q6PKH5	A0A0S2Z4W4;Q7Z3D7;P98175;A0A0S2Z4X1;Q6PKH5	RNA-binding protein 10	DKFZp686E2459;RBM10			17.4	103.53	0.0195294	0.999015	0.012228	0.0586713	0.0520313	0.96789	-0.0330931	-0.151261	26.7153	26.3924	26.5052	26.9203	26.3414	26.3879	26.3258	26.4991	26.7253
J3QS48;I3L295;J3KTK8;Q96N63;Q96K24;J3QQZ4;J3KT75;B4DMY7;J3QW43;J3QRD5;Q9H3L2;B2RB74;A0A291FGE0;A0A291FGC8;A0A0S2Z4W8;B4DLH7;Q1HDL3;O75352;J3KSI4;I3L405;I3L261;I3L1D2;A0A0S2Z4T4;I3L4E0	J3QS48;I3L295;J3KTK8;Q96N63;Q96K24;J3QQZ4;J3KT75;B4DMY7;J3QW43;J3QRD5;Q9H3L2;B2RB74;A0A291FGE0;A0A291FGC8;A0A0S2Z4W8;B4DLH7;Q1HDL3;O75352;J3KSI4;I3L405;I3L261;I3L1D2;A0A0S2Z4T4;I3L4E0	Mannose-P-dolichol utilization defect 1 protein	MPDU1;HBEBP2BPA			24.8	10.978	1.63743	0.446809	0.214814	3.58596	0.304439	0.826885	-0.0495898	-0.747905	24.6132	24.5414	24.4621	24.7798	24.8081	24.6733	24.7682	24.601	24.7432
A0A0S2Z4Y5;Q5QPK2;H0Y368;O60762	A0A0S2Z4Y5;Q5QPK2;H0Y368;O60762	Dolichol-phosphate mannosyltransferase subunit 1	DPM1			20	29.634	0.124579	0.946594	-0.0582841	-0.340484	0.2944	0.833387	-0.156532	-0.726635	24.7384	24.4153	24.3855	24.6941	24.2536	24.4166	24.5989	24.2956	24.0002
A0A0S2Z4Z0;Q96PK6;Q59GV2;A0A0S2Z567;B4DNG4;A0A0A6YYI9;A0A0S2Z5V2;F8WDX3;A0A0A0MSL8;B8ZZ74	A0A0S2Z4Z0;Q96PK6	RNA-binding protein 14	RBM14			44.4	69.491	0.254259	0.902728	-0.0637315	-0.640236	0.0314151	0.983649	-0.00985845	-0.0932106	30.2223	30.4023	30.2865	30.4048	30.1255	30.1897	30.1035	30.3051	30.2817
A0A0S2Z4Z2;A8K6K1;A0A0S2Z537;O75150;H3BP71;B4DMM1;B4DFU2;H3BS50;B3KQV1;B4DEN2;Q6ZN99;A0A087WTK2;B4E313;H3BQ99;H3BUL6;I3L332	A0A0S2Z4Z2;A8K6K1;A0A0S2Z537;O75150;H3BP71;B4DMM1	E3 ubiquitin-protein ligase BRE1B	RNF40			20.6	107.25	0.501616	0.782542	0.127954	1.14774	0.190584	0.888698	-0.0219568	-0.497741	26.5159	26.1641	26.4154	26.416	26.5316	26.5317	26.5127	26.4596	26.441
A8K525;A0A0S2Z4Z9;Q15233;H7C367;C9JYS8;C9IZL7;C9J4X2;A0A0S2Z4E7	A8K525;A0A0S2Z4Z9;Q15233;H7C367	Non-POU domain-containing octamer-binding protein	NONO			71.8	54.287	0.285025	0.891329	-0.0770976	-0.706656	0.729302	0.622833	-0.182426	-1.59242	32.4459	32.4337	32.5112	32.4813	32.1741	32.5041	32.1193	32.2437	32.2492
A0A0S2Z523;E5KRX5;Q15526;A0A087WYS9	A0A0S2Z523;E5KRX5;Q15526;A0A087WYS9	Surfeit locus protein 1	SURF1			35.3	26.752	0.448052	0.806674	-0.121653	-1.0416	1.36602	0.468305	0.322582	2.92448	26.422	26.5866	26.4317	26.1522	26.4396	26.4836	26.6538	26.6351	26.7543
E5RIP4;A0A0S2Z5C8;A0A0S2Z5B1;A0A0S2Z5Z7;A0A0S2Z534;Q15043;E5RFZ8;E5RGA7;E5RJ40;E5RJG5	E5RIP4;A0A0S2Z5C8;A0A0S2Z5B1;A0A0S2Z5Z7;A0A0S2Z534;Q15043;E5RFZ8;E5RGA7;E5RJ40;E5RJG5	Zinc transporter ZIP14	SLC39A14			21.3	17	0.696108	0.679476	0.381644	1.52762	0.587083	0.687064	-0.301448	-1.31519	22.4626	23.1995	23.1895	23.3657	23.4039	23.2269	23.2562	23.2508	22.5851
K7EQ55;K7EK33;A0A0S2Z569;Q96EP5;K7EQ02;Q5IRN2	K7EQ55;K7EK33;A0A0S2Z569;Q96EP5;K7EQ02;Q5IRN2	DAZ-associated protein 1	DAZAP1;DAZAP1/MEF2D fusion			16.7	43.312	0.145748	0.938476	0.0469945	0.392201	1.02326	0.545532	0.323008	2.17961	26.2251	26.4061	26.4223	26.1959	26.4789	26.5196	26.5717	26.6615	26.9302
A0A2R8YDQ0;A0A0S2Z577;Q9H267;B7Z6M7;F5H008;B7Z1N4;A0A0S2Z555;G3V3F9;A0A0S2Z589	A0A2R8YDQ0;A0A0S2Z577;Q9H267;B7Z6M7;F5H008;B7Z1N4	Vacuolar protein sorting-associated protein 33B	VPS33B			12.4	68.736	0.0355827	0.989883	0.00984701	0.105129	0.833777	0.602574	-0.165285	-1.7977	24.2623	24.1702	24.298	24.3837	24.0921	24.2842	24.0537	24.0552	24.1552
A0A0S2Z583;Q8TC12;A0A0S2Z575;G3V2G6;G3V234;B3KQ19;H0YJ46;H0YIZ8;H0YJ10	A0A0S2Z583;Q8TC12;A0A0S2Z575;G3V2G6	Retinol dehydrogenase 11	RDH11			34.9	35.386	0.60962	0.730459	-0.173782	-1.35913	0.888798	0.585326	0.143857	1.90707	27.3039	27.6771	27.6402	27.4187	27.2719	27.4093	27.4398	27.4647	27.6269
A0A0S2Z5B4;Q6IAK1;A0A0S2Z5A2;Q53F53;A0A0S2Z5B0;Q8WXF7	A0A0S2Z5B4;Q6IAK1;A0A0S2Z5A2;Q53F53;A0A0S2Z5B0;Q8WXF7	Atlastin-1	SPG3A;ATL1			16.4	47.267	0.0385927	0.988526	0.0089035	0.113677	0.836102	0.60382	0.201513	1.8023	23.5148	23.7165	23.6013	23.699	23.639	23.5213	24.0008	23.6596	23.8035
A0A0S2Z5C3;Q9NWT1	A0A0S2Z5C3;Q9NWT1	p21-activated protein kinase-interacting protein 1	PAK1IP1			19.4	43.963	0.925482	0.5988	0.297289	1.98061	0.364952	0.806464	-0.233417	-0.873764	25.5668	26.0215	25.8055	26.2019	25.9562	26.1275	26.3718	25.6631	25.5505
A0A0S2Z5D4;Q9UJW0;A0A0S2Z5B8;A0A0S2Z5D5;E5RI97;E5RGG1;H9KVE0;B4DL03;B4DS07;E5RK21;Q9NSJ5	A0A0S2Z5D4;Q9UJW0;A0A0S2Z5B8	Dynactin subunit 4	DCTN4			24.3	52.337	1.15873	0.532714	0.301755	2.46408	1.39954	0.47407	0.26536	3.00225	24.1179	23.9423	23.7858	24.1689	24.4025	24.1798	24.5851	24.4316	24.5305
A0A0S2Z5E9;Q69YN2;D3DR67;A0A286YF56	A0A0S2Z5E9;Q69YN2	CWF19-like protein 1	CWF19L1			14.1	60.618	1.12129	0.5265	-0.289622	-2.38433	0.633387	0.671857	0.14279	1.40543	24.908	25.1274	24.8051	24.8046	24.554	24.613	24.9043	24.6727	24.8229
A0A0S2Z5H3;A0A0S2Z4Y4;Q14677	A0A0S2Z5H3;A0A0S2Z4Y4;Q14677	Clathrin interactor 1	CLINT1			14.5	70.294	1.59772	0.438014	0.350934	3.4844	0.0325114	0.981996	0.0213846	0.0963552	25.7689	25.5925	25.6782	25.9203	25.9699	26.2022	26.4321	25.7324	25.992
Q53FV3;A0A0S2Z5H7;Q9BT78;B3KM48;D6RFN0;D6RAX7;D6RD63;D6REK7	Q53FV3;A0A0S2Z5H7;Q9BT78;B3KM48;D6RFN0;D6RAX7;D6RD63	COP9 signalosome complex subunit 4	COPS4			61.6	46.267	1.70921	0.428103	0.305941	3.77418	1.00713	0.548435	0.168531	2.14646	27.4387	27.3111	27.4933	27.6472	27.8403	27.6734	27.9886	27.8462	27.8317
A0A0S2Z5K3;Q3LIB4;A0A0S2Z5R3;Q9NPI6;A0A087WT55;A0A0S2Z5I2;A0A087WXD0;A0A087WVE6	A0A0S2Z5K3;Q3LIB4;A0A0S2Z5R3;Q9NPI6	mRNA-decapping enzyme 1A	Nbla00360;DCP1A			17.9	59.488	0.276956	0.896612	-0.270277	-0.689367	0.354297	0.805939	-0.614936	-0.851867	23.9272	24.2926	24.1821	23.9389	23.1766	24.4756	23.1778	24.3489	22.2196
A0A0S2Z5K8;V9HWK4;Q96SI9;H0YC91	A0A0S2Z5K8;V9HWK4;Q96SI9	Spermatid perinuclear RNA-binding protein	HEL162;STRBP			28.8	72.131	0.370299	0.846589	0.0799205	0.884716	0.303428	0.827437	0.0688807	0.745771	27.2863	27.1858	27.1371	27.1799	27.2311	27.4381	27.2834	27.328	27.4443
B4DRU9;A0A0S2Z5L1;Q9NUQ8;F8WCU6;A0A0S2Z645	B4DRU9;A0A0S2Z5L1;Q9NUQ8	ATP-binding cassette sub-family F member 3	ABCF3			6.4	75.573	0.135664	0.9412	0.0577946	0.367732	0.0530179	0.968091	-0.0238132	-0.153984	23.7526	23.9055	23.8523	24.0777	23.5958	24.0103	23.8028	23.8903	23.9192
B3KQF0;A0A0S2Z5M1;Q9UGP8;B3KNE7;B3KWU4;A0A0S2Z518;A6PVC9	B3KQF0;A0A0S2Z5M1;Q9UGP8;B3KNE7;B3KWU4	Translocation protein SEC63 homolog	SEC63			25.9	87.998	0.0402076	0.990325	0.019029	0.118243	0.109559	0.93419	0.0480982	0.302941	26.5386	26.4521	26.5562	26.2235	26.6458	26.7347	26.6077	26.5942	26.5464
B4DT15;A0A0S2Z5M8;Q9BQ52;G5E9D5;B3KT00;B3KSU9;B4E365;E7ES68;H7C2I4;V9GYS7;J3QRS2;V9GYU5;J3QL08;J3QLK4;V9GZ72	B4DT15;A0A0S2Z5M8;Q9BQ52;G5E9D5;B3KT00;B3KSU9;B4E365;E7ES68	Zinc phosphodiesterase ELAC protein 2	ELAC2			29.1	90.6	0.0126037	0.997948	0.00476519	0.0381502	0.714099	0.629381	0.180237	1.56272	26.7614	26.9056	26.5451	26.8761	26.6956	26.6547	26.831	26.8275	27.1087
A0A0S2Z5P5;Q9BTE3	A0A0S2Z5P5;Q9BTE3	Mini-chromosome maintenance complex-binding protein	MCMBP			4.7	72.748	0.336986	0.862205	0.215342	0.816064	0.368843	0.805677	0.167508	0.881738	24.3158	23.602	24.0228	23.8702	24.3857	24.3307	24.2119	24.5436	24.3337
C9IYN3;A8K894;D6W592;A0A0S2Z6K1;A0A0S2Z5U3;Q8WVV9;B7WPG3;A0A0S2Z610;H7BXH8;H7C464;C9JJZ7	C9IYN3;A8K894;D6W592;A0A0S2Z6K1;A0A0S2Z5U3;Q8WVV9;B7WPG3	Heterogeneous nuclear ribonucleoprotein L-like	HNRNPLL;HNRPLL			44.5	59.663	0.660332	0.707837	-0.223667	-1.45791	0.539336	0.705572	0.153189	1.22185	27.2546	26.8993	26.9553	26.6369	27.0052	26.7961	27.0785	26.8502	26.9691
A0A0S2Z652;P83436;B3KSN1	A0A0S2Z652;P83436;B3KSN1	Conserved oligomeric Golgi complex subunit 7	COG7			7.4	86.343	0.0871688	0.97044	0.0150325	0.245506	0.163207	0.903059	0.0584373	0.433897	22.9136	22.9851	22.832	22.8625	22.9074	23.0059	22.8513	22.8605	23.2393
A0A0S2Z693;Q96RQ3;E9PHF7;E9PG35;Q68D27;F5GYT8;B4DH16;G5E9X5;B4DHW5;B7ZAW3;F8WDI3	A0A0S2Z693;Q96RQ3;E9PHF7;E9PG35;Q68D27;F5GYT8;B4DH16;G5E9X5;B4DHW5	Methylcrotonoyl-CoA carboxylase subunit alpha, mitochondrial	MCCC1;DKFZp686B20267			69.4	80.472	0.274924	0.896507	-0.135684	-0.684999	0.929138	0.578831	0.393304	1.98797	32.1511	32.3477	32.2156	31.999	32.4698	31.8385	32.3828	32.5383	32.5661
A0A0U1RQK7;Q59GJ0;B4DH17;A0A0A0MSA7;O43432;B4DZE1;B4DXR2	A0A0U1RQK7;Q59GJ0;B4DH17;A0A0A0MSA7;O43432;B4DZE1	Eukaryotic translation initiation factor 4 gamma 3	EIF4G3			9.1	195.27	0.500533	0.781788	0.0798607	1.1456	0.0366169	0.977608	0.00580152	0.108071	25.3678	25.2649	25.4945	25.4713	25.4135	25.4819	25.4681	25.3728	25.5432
A0A0U1RQQ9;Q6P3W7;F8VSC5;Q9NWE9;H0YIK6	A0A0U1RQQ9;Q6P3W7;F8VSC5	SCY1-like protein 2	SCYL2			7.4	104.11	1.06495	0.540238	0.355652	2.26598	0.402694	0.788845	-0.102768	-0.950582	24.4319	23.9738	24.0709	24.5178	24.3879	24.6378	24.5144	24.253	24.4679
A0A1B0GW38;A0A0U1RQX8;P22681;A0A0U1RR39;A0A0U1ZE08;A0A2R8YDW4;C9JU85;A0A2R8Y7I2;A0A0U1ZBR1;A0A0U1ZID9;A0A0U1ZI18;B5MC15;A0A2R8Y8D8;A0A2R8Y5E1;A0A2R8YFD4;B7ZAG1;B4DYP3;B8K284;H0Y3L9;Q13191	A0A1B0GW38;A0A0U1RQX8;P22681;A0A0U1RR39	E3 ubiquitin-protein ligase CBL	CBL			17.5	95.95	0.235206	0.905331	-0.177966	-0.598371	0.328757	0.816571	-0.213985	-0.79894	24.7147	25.1196	25.1988	25.2927	24.4046	24.8018	24.7299	24.6534	24.4739
F6XEV2;A0A0U1RRK1;A0A286YF11;Q9BPX6;S4R3D7;E9PQV6;S4R3V1	F6XEV2;A0A0U1RRK1;A0A286YF11;Q9BPX6;S4R3D7;E9PQV6;S4R3V1	Calcium uptake protein 1, mitochondrial	MICU1			8.4	54.578	0.222356	0.907982	-0.0965042	-0.569784	0.477518	0.748209	0.159573	1.10014	22.6925	22.3927	22.6567	22.6301	22.6191	22.2031	22.572	22.6807	22.6784
A0A0U1RRM1;Q8WXI9;B3KSZ4;A0A0U1RR30;A0A0U1RR34;A0A0U1RRK3	A0A0U1RRM1;Q8WXI9;B3KSZ4	Transcriptional repressor p66-beta	GATAD2B			28.8	63.461	0.125606	0.946002	0.0244198	0.343024	2.07305	0.371059	-0.31567	-4.83154	27.1917	27.0387	27.123	27.1061	27.0689	27.2517	26.7892	26.796	26.8945
A0A0U1RRM4;P26599;A6NLN1;Q59H49;K7EKJ7;A0A0D9SF20;K7EK45;K7ES59;A0A087WU68;K7ELW5;A0A087WUW5;K7EKX4;X6R242	A0A0U1RRM4;P26599;A6NLN1;Q59H49	Polypyrimidine tract-binding protein 1	PTBP1			58.8	62.463	0.793214	0.643605	0.115752	1.71769	0.589831	0.684303	0.102207	1.32055	30.89	31.0186	30.9794	30.9674	31.1398	31.1281	31.1295	31.1242	31.2882
Q5U0A0;A0A109NGN6;P28066	Q5U0A0;A0A109NGN6;P28066	Proteasome subunit alpha type;Proteasome subunit alpha type-5	PSMA5			49	26.425	0.580907	0.751352	0.0895138	1.30314	0.20128	0.881646	-0.138394	-0.522225	27.8684	27.6403	27.792	27.8324	27.8526	27.8841	27.2017	27.8757	28.0766
A0A140TA86;Q5XKP0;K7EIR2;A0A140TA84	A0A140TA86;Q5XKP0;K7EIR2;A0A140TA84	Protein QIL1	QIL1;C19orf70			57.9	15.436	0.0934187	0.967715	0.0436268	0.261726	0.0876209	0.947826	-0.049338	-0.246684	24.3193	24.3576	24.7455	24.5583	24.6604	24.3346	24.7495	24.5095	24.1462
A0A140VJC9;O95372;Q5QPQ0;Q5QPQ1;Q5QPQ3;Q5QPQ2;Q5QPN9;Q5QPN5	A0A140VJC9;O95372;Q5QPQ0;Q5QPQ1;Q5QPQ3;Q5QPQ2	Acyl-protein thioesterase 2	LYPLA2			44.2	24.737	2.02176	0.364716	0.150146	4.67099	0.145448	0.919329	-0.0424232	-0.391476	27.2977	27.3826	27.3527	27.5189	27.454	27.5105	27.2399	27.5431	27.5732
A0A140VJD0;Q9UFC0;Q59FT0;H7C5S6;F8WDB4	A0A140VJD0;Q9UFC0;Q59FT0;H7C5S6	Leucine-rich repeat and WD repeat-containing protein 1	LRWD1			27.8	70.86	0.157255	0.935568	-0.0387999	-0.419774	0.00559148	0.996923	-0.00195376	-0.0170575	26.0973	25.8312	25.8613	25.9509	25.9027	25.8198	26.1014	25.7487	25.8174
A0A140VJE3;P50579;G3V1U3;B3KWL6;F8VRR3;F8VQZ7;F8VY03;F8VZX9;F8VSC4;Q96B43	A0A140VJE3;P50579;G3V1U3;B3KWL6;F8VRR3;F8VQZ7;F8VY03	Methionine aminopeptidase 2;Methionine aminopeptidase	METAP2			25.1	52.891	1.18482	0.539347	0.171975	2.52023	0.731531	0.622796	0.15012	1.59677	24.1675	24.2807	24.297	24.4892	24.4597	24.3122	24.4876	24.5008	24.7231
Q8IY97;A0A140VJE7;B3KXW5;O43747;B4DDL1;B4DS96;H3BNR4;B3KNW1;H3BN75;H3BS13;H3BV30;H3BRM7;H3BN71;B4DGE1;H3BR36;H3BUN9	Q8IY97;A0A140VJE7;B3KXW5;O43747;B4DDL1;B4DS96	AP-1 complex subunit gamma-1	AP1G1			16.8	91.756	0.164327	0.930906	0.0256093	0.436543	0.265297	0.847282	0.0422656	0.664223	26.5064	26.4499	26.4066	26.5384	26.3782	26.5232	26.5979	26.479	26.4896
H0UID4;H0UID3;A8K916;A0A140VJE8;P63010;Q68DI0;A8K0G3;H0UID5;A0A087X253;B4DWG4;A0A087WU93;A0A087WZQ6;B4E261;A0A087WYD1;B4DIL5;Q96EL6;K7EN71;K7ERB2;K7EJX1;A0A087WXS3;K7EKZ5;K7EJ01;H7C034	H0UID4;H0UID3;A8K916;A0A140VJE8;P63010;Q68DI0;A8K0G3;H0UID5;A0A087X253;B4DWG4;A0A087WU93;A0A087WZQ6;B4E261;A0A087WYD1;B4DIL5	AP complex subunit beta;AP-2 complex subunit beta	AP2B1;DKFZp781K0743			39.4	104.34	0.136333	0.941422	-0.0269502	-0.369365	0.0777118	0.954911	0.0128613	0.220667	29.808	30.0423	29.9104	29.8837	29.8522	29.9439	29.8187	29.9021	29.9977
J3QT28;A0A140VJF3;O43684;B4DDM6;J3QSX4	J3QT28;A0A140VJF3;O43684;B4DDM6	Mitotic checkpoint protein BUB3	BUB3			50.4	31.703	0.568136	0.75134	0.104062	1.2782	1.37285	0.477005	-0.197679	-2.94025	27.881	27.9686	28.0566	28.0572	27.971	28.1901	27.8525	27.8548	27.918
A0A140VJF4;P53004;C9J1E1	A0A140VJF4;P53004	Biliverdin reductase A	BLVRA			39.2	33.428	0.171272	0.926921	-0.0383313	-0.452891	0.903452	0.585472	0.249612	1.93638	27.6796	27.4215	27.591	27.5643	27.4501	27.5627	27.6156	27.6926	28.0178
A0A140VJJ2;P10768;X6RA14;H7BZT7;U3KQT1	A0A140VJJ2;P10768;X6RA14;H7BZT7	S-formylglutathione hydrolase	ESD			41.5	31.462	0.893396	0.620125	0.112305	1.91625	1.7503	0.406362	0.233202	3.88469	27.7181	27.7809	27.5906	27.7755	27.8173	27.8336	28.0287	27.9498	28.1476
A0A140VJK1;O76003	A0A140VJK1;O76003	Glutaredoxin-3	GLRX3			36.1	37.432	0.142076	0.939121	0.0356274	0.383324	0.815556	0.594387	0.160847	1.7617	27.0632	26.9325	27.0619	26.9302	27.21	27.0242	27.2257	27.1424	27.2789
A8K1Z2;A0A140VJK2;P43304;Q53T76;B7Z601;Q8WUQ0;F5GYK7;A0A0S2Z3S0;E7EM56	A8K1Z2;A0A140VJK2;P43304;Q53T76;B7Z601	Glycerol-3-phosphate dehydrogenase;Glycerol-3-phosphate dehydrogenase, mitochondrial	GPD2			48.1	80.734	0.477999	0.794348	-0.105946	-1.10109	0.0328492	0.981691	0.0140355	0.0973227	28.8543	28.9909	28.8309	28.9427	28.6641	28.7514	28.5726	28.8566	28.9711
A0A140VJK6;P49915;B4DUT7;Q53F90	A0A140VJK6;P49915;B4DUT7;Q53F90	GMP synthase [glutamine-hydrolyzing]	GMPS			51.5	76.715	1.55534	0.458543	0.104022	3.3779	1.37672	0.473991	0.0981242	2.9492	28.0975	28.0839	28.0433	28.2299	28.1433	28.1636	28.3182	28.2562	28.2567
A0A140VJL0;Q6NVY1;B9A058;B8ZZZ0;H7C126;F8W8A6;H7C400;H7C1A5	A0A140VJL0;Q6NVY1	3-hydroxyisobutyryl-CoA hydrolase, mitochondrial	HIBCH			19.4	43.482	0.510696	0.783187	-0.51165	-1.16562	0.790326	0.601556	-0.78228	-1.71201	24.0535	23.6501	23.8019	23.7772	23.7149	22.4785	22.8285	22.2304	22.5648
Q6LET3;A0A140VJL3;P00492;A0A0H3YEQ7;Q9NRG1	Q6LET3;A0A140VJL3;P00492	Hypoxanthine-guanine phosphoribosyltransferase	HPRT1			35.3	24.588	1.315	0.510424	0.239765	2.80797	2.29037	0.392387	0.462394	5.55972	26.141	26.2534	26.1316	26.3974	26.5545	26.2934	26.8905	26.9287	26.8131
J3QQM5;A0A140VJN0;Q9BT23;J3KRR0;J3QL69	J3QQM5;A0A140VJN0;Q9BT23;J3KRR0;J3QL69	LIM domain-containing protein 2	LIMD2			38.5	12.013	0.580593	0.750474	0.163841	1.30252	0.103836	0.93729	0.0336742	0.288435	26.6245	26.7517	26.8486	27.0185	27.0079	26.6901	26.907	26.8825	27.0279
A0A140VJN3;Q9H9A6	A0A140VJN3;Q9H9A6	Leucine-rich repeat-containing protein 40	LRRC40			20.4	68.249	0.378917	0.842119	0.141176	0.902318	0.139706	0.921229	-0.0504634	-0.377574	25.2911	25.0329	24.9287	25.1422	25.4499	25.0841	25.2588	25.2314	25.0346
A0A140VJN8;O60664;K7ERZ3;K7EL96;K7ER39	A0A140VJN8;O60664;K7ERZ3;K7EL96	Perilipin-3	PLIN3			35.6	46.946	2.15919	0.334296	0.588659	5.1106	0.208887	0.873316	0.093682	0.53949	25.6821	25.5307	25.7121	26.03	26.3472	26.3136	26.4696	26.4614	26.0409
A0A140VJP1;E9PC69;Q7KZI7;A0A024R5B2;E7ETY4;A9CP04;A8K2S4;A0A024R555;F5H4F6;F5H6N2;H0YNV4;O75271;Q96L34;Q5DNC6;K7EN95;K7EK17;K7EKG8;F5H4J8;Q6IPE9;H0YKJ3;Q8N2N5	A0A140VJP1;E9PC69;Q7KZI7;A0A024R5B2;E7ETY4;A9CP04;A8K2S4;A0A024R555	Serine/threonine-protein kinase MARK2	MARK2;Par1b			16.7	80.646	0.471747	0.795107	-0.0911655	-1.08871	0.795719	0.603101	0.194916	1.72262	26.3193	26.3267	26.3974	26.1313	26.4053	26.2333	26.3491	26.3963	26.6094
A0A140VJP2;Q9NZL9;H7C0X7;B7Z1X8;E5RJR3	A0A140VJP2;Q9NZL9;H7C0X7;B7Z1X8	Methionine adenosyltransferase 2 subunit beta	MAT2B			40.7	37.551	0.790004	0.641297	0.122853	1.71137	0.124176	0.924536	-0.0226116	-0.339487	28.3195	28.5024	28.4703	28.5081	28.5103	28.6425	28.434	28.5614	28.5976
A0A140VJP5;P31153;B4DEX8;B4E1K2;B4DFQ8;B4DN74;A8K455;Q00266	A0A140VJP5;P31153;B4DEX8	S-adenosylmethionine synthase isoform type-2;S-adenosylmethionine synthase	MAT2A			34.4	43.66	0.198061	0.914602	0.0897834	0.514882	1.17529	0.519951	-0.248161	-2.49967	27.883	27.4343	27.8615	27.8132	27.6527	27.9823	27.5853	27.6059	27.5125
A0A140VJQ4;P04181;Q59HE2	A0A140VJQ4;P04181;Q59HE2	Ornithine aminotransferase, mitochondrial;Ornithine aminotransferase, hepatic form;Ornithine aminotransferase, renal form	OAT			39.6	48.534	0.0899294	0.970054	0.0295321	0.252689	0.573828	0.68989	0.103474	1.28932	26.2881	26.111	26.4286	26.4383	26.2882	26.1899	26.4788	26.371	26.3769
A0A140VJQ6;Q9BXB4;Q9GZM0;Q8WYV5;Q59ED9;H7C487;Q9NX98;B3KUL5;Q9BXB5	A0A140VJQ6;Q9BXB4;Q9GZM0	Oxysterol-binding protein-related protein 11;Oxysterol-binding protein	OSBPL11			6.3	83.642	0.0110933	0.997896	-0.0055383	-0.0336342	0.212115	0.871892	0.12365	0.546782	24.4271	24.6158	24.478	24.2181	24.7508	24.5355	24.3787	24.5584	24.9382
F5GZ78;A0A140VJQ8;A0A1B0GTU4;P49023;B3KVL0;F5H836;B4DRY6;Q6ZQU7;A0A1B0GU60;Q59GS5;B4DNT9	F5GZ78;A0A140VJQ8;A0A1B0GTU4;P49023;B3KVL0;F5H836;B4DRY6;Q6ZQU7;A0A1B0GU60;Q59GS5	Paxillin	PXN			9.7	64.232	1.03104	0.551098	0.130563	2.19566	0.546689	0.705375	0.324558	1.23626	22.8589	22.8285	22.7935	22.8538	22.9712	23.0477	23.7567	23.2131	22.8765
A0A140VJR2;P12955;J3K000;A0A494C165;K7ES25;A0A494C194;V9GYL0;V9GYE4	A0A140VJR2;P12955;J3K000;A0A494C165;K7ES25;A0A494C194	Xaa-Pro dipeptidase	PEPD			46.9	54.548	0.023606	0.996013	-0.00614929	-0.070612	0.507109	0.725819	0.182762	1.15856	30.7674	30.928	30.775	30.9477	30.7097	30.7945	30.7218	31.0943	31.1841
A0A140VJS3;P62195;Q59GS3;J3QSA9;J3QQM1;J3KRP2;J3QLH6;J3QSE0;J3QRW1;J3QRR3;J3KTQ9	A0A140VJS3;P62195;Q59GS3;J3QSA9;J3QQM1;J3KRP2;J3QLH6	26S protease regulatory subunit 8	PSMC5			54.7	45.626	0.32375	0.869722	-0.0434418	-0.788487	0.405371	0.787811	0.0620384	0.955989	27.3084	27.1601	27.2686	27.1469	27.1998	27.2602	27.3676	27.2502	27.175
A0A140VJS6;P49721;Q59FJ0;B7Z478;A0A087WVV1	A0A140VJS6;P49721;Q59FJ0;B7Z478	Proteasome subunit beta type-2;Proteasome subunit beta type	PSMB2			42.8	22.836	0.243677	0.904276	-0.0633361	-0.617057	0.358874	0.806266	0.14634	0.861286	26.4647	26.6535	26.5615	26.6403	26.3398	26.5095	26.9335	26.5217	26.4735
Q56VW8;A0A140VJT0;P63151;E5RIY1;Q66LE6;A0A1W2PQI2;Q00005;E5RFR9;Q6PEG1;Q6IN90;Q6ZP32;B3KMA9;H0YB06;Q9Y2T4;E5RHQ2;E5RJV2;H0YA16;Q9NZ48;Q59GC6	Q56VW8;A0A140VJT0;P63151;E5RIY1	Serine/threonine-protein phosphatase 2A 55 kDa regulatory subunit B;Serine/threonine-protein phosphatase 2A 55 kDa regulatory subunit B alpha isoform	PPP2R2A			35.8	51.647	0.706745	0.67286	0.13802	1.54837	0.0854702	0.948681	0.0330404	0.241071	26.5036	26.6767	26.7016	26.6453	26.7879	26.8628	26.976	26.8527	26.5664
B4DFK1;Q5QPM7;A0A140VJT2;Q92530;Q5QPM9;H0Y555;F5H4Z3;B4DXW9;B4DUJ0	B4DFK1;Q5QPM7;A0A140VJT2;Q92530;Q5QPM9	Proteasome inhibitor PI31 subunit	PSMF1			26.4	21.69	0.0251958	0.995079	-0.00993156	-0.0752415	0.428281	0.773953	-0.23298	-1.00208	22.7269	22.7384	22.8146	22.8174	22.5005	22.9323	22.8942	22.2545	22.4025
A0A140VJW5;P14868;D3DP78;Q53T60;Q53R85;C9J7S3;C9JLC1;H7BZ35;H7C278;C9JQM9	A0A140VJW5;P14868;D3DP78;Q53T60	Aspartate--tRNA ligase, cytoplasmic	DARS			67.9	57.136	0.0338256	0.990736	0.00643539	0.100116	0.282122	0.840286	-0.0357933	-0.700446	30.0007	29.9442	29.8301	30.0042	29.8656	29.9245	29.8355	29.9091	29.9424
A0A140VJW8;Q9P273	A0A140VJW8;Q9P273	Teneurin-3	TENM3			2	300.95	0.542872	0.762212	0.365989	1.22878	0.714416	0.629782	-0.894309	-1.56334	22.2749	22.319	22.2262	23.2267	22.4184	22.2731	22.338	20.7748	22.1224
A0A140VJX1;P24752;H0YEL7;E9PKF3	A0A140VJX1;P24752	Acetyl-CoA acetyltransferase, mitochondrial	ACAT1			53.4	45.199	0.257468	0.899227	0.0733217	0.647227	0.196507	0.883494	0.0448856	0.511329	27.9085	27.5566	27.7374	27.7079	27.8476	27.867	27.9889	27.8241	27.7441
A0A140VJX3;P25325;Q2VEU1;B1AH49;Q59HD5;Q2VEU0	A0A140VJX3;P25325;Q2VEU1;B1AH49;Q59HD5	3-mercaptopyruvate sulfurtransferase;Sulfurtransferase	MPST			29.6	33.178	0.278025	0.896477	0.0599569	0.691663	0.189002	0.889557	0.053175	0.494099	27.0542	27.3023	27.2662	27.2661	27.2006	27.3359	27.5124	27.276	27.1738
A0A140VJX5;Q96SK2;C9J5K4;C9JYX1	A0A140VJX5;Q96SK2	Transmembrane protein 209	TMEM209			11.4	62.921	0.431882	0.808514	-0.0687199	-1.0093	2.28072	0.379152	-0.290883	-5.52565	24.462	24.5687	24.6212	24.5255	24.537	24.3833	24.204	24.1552	24.2139
A0A140VJY7;Q9BRA2;I3L0K2;I3L3M7;I3L2R6	A0A140VJY7;Q9BRA2;I3L0K2;I3L3M7	Thioredoxin domain-containing protein 17	TXNDC17			26.8	13.941	0.0540281	0.981931	0.016805	0.156767	0.220046	0.8661	-0.0841179	-0.564614	25.854	26.0533	26.0225	26.0408	26.1156	25.8238	26.1342	25.7213	25.8723
A0A140VJZ1;P45974;F5H571	A0A140VJZ1;P45974	Ubiquitin carboxyl-terminal hydrolase 5	USP5			38.6	95.785	1.73113	0.424505	0.207839	3.83286	0.620175	0.683919	-0.0796363	-1.3797	27.9194	27.7507	27.8592	28.0108	28.0886	28.0534	28.0767	27.9063	27.9309
A0A140VK07;Q6DEN2;B4DLZ4;H0YBT4;Q14117;H0YB87	A0A140VK07;Q6DEN2		DPYSL3			82.7	73.91	0.495026	0.782713	0.0960147	1.13474	0.382427	0.800344	0.0700391	0.909469	32.4346	32.2982	32.3696	32.316	32.56	32.5144	32.526	32.5068	32.5677
A0A140VK11;H0YGM0;Q9H078;A0A2U3TZY2;Q7Z777;A0A2R8Y602;F5H7A5;A0A2R8YDH5;F5H392;A0A2R8Y6R5	A0A140VK11;H0YGM0;Q9H078;A0A2U3TZY2;Q7Z777;A0A2R8Y602	Caseinolytic peptidase B protein homolog	CLPB			23.5	78.728	0.171944	0.926046	-0.0212237	-0.454466	0.0695177	0.957479	0.0105597	0.198843	26.1012	26.2383	26.1894	26.1806	26.1774	26.1073	26.1079	26.1294	26.2597
A0A140VK12;Q9UBF2;Q9H9B7;B3KND4;Q9NUP3;Q9H279;Q9NSM7	A0A140VK12;Q9UBF2;Q9H9B7;B3KND4	Coatomer subunit gamma-2;Coatomer subunit gamma	COPG2			28.9	97.621	0.18529	0.919248	0.0203756	0.485532	0.108168	0.93516	-0.0413024	-0.299426	27.7999	27.8521	27.817	27.8473	27.7739	27.909	27.5622	27.8254	28.0187
A0A1B0GTB8;A0A1B0GWC0;A0A140VK13;A0A1B0GVF3;P23786;A0A1B0GV75;A0A1B0GTM0;A0A1B0GUD9	A0A1B0GTB8;A0A1B0GWC0;A0A140VK13;A0A1B0GVF3;P23786;A0A1B0GV75	Carnitine O-palmitoyltransferase 2, mitochondrial	CPT2			30.7	71.181	0.219135	0.906953	-0.109053	-0.562571	0.59508	0.685488	-0.158051	-1.33079	26.499	26.9684	26.9982	26.9032	26.5331	26.7021	26.5674	26.6371	26.4598
A8K930;A0A140VK17;Q8NDI1	A8K930;A0A140VK17;Q8NDI1	EH domain-binding protein 1	EHBP1			2.5	132.29	1.14765	0.532371	0.193462	2.44039	0.59382	0.684076	0.300186	1.32833	22.7687	22.878	22.7876	22.8622	23.0895	23.063	23.4183	22.8905	23.6065
A0A140VK27;P09960;B4DVZ8;Q49AK0;Q59ES1;B4DEH5	A0A140VK27;P09960;B4DVZ8	Leukotriene A-4 hydrolase;Leukotriene A(4) hydrolase	LTA4H			39.6	69.284	0.875831	0.62495	0.176562	1.8812	0.355898	0.8045	0.0258993	0.855164	27.328	27.0412	27.2937	27.35	27.4358	27.4068	27.3982	27.4168	27.4553
A0A140VK29;Q9HCC0;D6RDF7;A0A0S2Z5R4;D6R9R1;B3KR24;D6RD67;A0A0G2JM88	A0A140VK29;Q9HCC0;D6RDF7;A0A0S2Z5R4	Methylcrotonoyl-CoA carboxylase beta chain, mitochondrial	MCCC2			42.6	61.332	0.443252	0.806225	-0.119662	-1.03203	0.384118	0.798327	-0.0658716	-0.912912	27.0512	27.4037	27.2164	27.1987	27.0067	27.107	26.9665	27.0238	27.1245
A0A140VK39;Q9Y570	A0A140VK39;Q9Y570	Protein phosphatase methylesterase 1	PPME1			26.2	42.315	0.444829	0.809988	0.131933	1.03518	0.320763	0.822231	0.0952314	0.782237	26.7414	26.6411	26.5627	26.6867	27.0119	26.6424	26.8061	26.8986	26.922
B2R860;A0A140VK41;P11908;D3YTJ7;A6NMS2;H7C540;B7ZB02	B2R860;A0A140VK41;P11908;D3YTJ7;A6NMS2	Ribose-phosphate pyrophosphokinase 2	PRPS2			35.5	34.67	0.37443	0.844064	0.156343	0.893162	0.771846	0.600435	0.204556	1.67571	25.7604	25.3849	25.2155	25.5178	25.7443	25.5677	25.9632	25.622	25.8583
Q6IB71;A0A140VK43;P25788;G3V4X5;G3V3W4;G3V5N4	Q6IB71;A0A140VK43;P25788;G3V4X5	Proteasome subunit alpha type;Proteasome subunit alpha type-3	PSMA3			32.5	28.415	0.221775	0.907889	0.0762094	0.568485	0.120049	0.929538	0.0316912	0.329241	27.0921	26.7728	26.8521	26.8881	27.169	26.8886	27.0332	26.9685	27.039
A0A140VK44;G3V5Z7;P60900;G3V295;G3V3I1;G3V3U4;Q9BZ93;G3V4S5;G3V2S7;Q59F72;H0YJC4	A0A140VK44;G3V5Z7;P60900;G3V295;G3V3I1;G3V3U4	Proteasome subunit alpha type;Proteasome subunit alpha type-6	PSMA6			44.7	27.399	0.195624	0.913663	0.047404	0.509309	0.500537	0.73178	-0.0670567	-1.14561	27.761	27.5001	27.5318	27.6706	27.7046	27.56	27.5108	27.5773	27.6459
Q53FT8;A0A140VK45;P20618;Q59GN1	Q53FT8;A0A140VK45;P20618	Proteasome subunit beta type;Proteasome subunit beta type-1	PSMB1			39	26.491	0.0160619	1	-0.00629743	-0.0484348	0.831279	0.60127	-0.255843	-1.79276	25.7548	25.3406	25.4975	25.6177	25.4559	25.5004	25.3902	25.0006	25.4157
A0A140VK46;P28070;B4DFL3	A0A140VK46;P28070;B4DFL3	Proteasome subunit beta type-4	PSMB4			40.9	29.204	0.593025	0.744569	0.166939	1.32678	0.527431	0.71065	0.0968857	1.1985	25.6891	26.0585	25.8654	26.1352	26.0684	25.9102	26.1171	26.2213	26.0661
A0A140VK49;Q7KZF4;B2R5U1;Q59FF0;B4E299;B3KU67;H7C597	A0A140VK49;Q7KZF4;B2R5U1;Q59FF0;B4E299;B3KU67	Staphylococcal nuclease domain-containing protein 1	SND1			59.5	102	0.144743	0.938369	-0.0329145	-0.389775	0.259812	0.848963	-0.0643756	-0.652326	30.4709	30.5514	30.5668	30.6042	30.3427	30.5436	30.3359	30.4217	30.5397
O60382;A0A140VK53;Q9UQ35;A0AUK8;I3L3Q8	O60382;A0A140VK53;Q9UQ35	Serine/arginine repetitive matrix protein 2	KIAA0324;SRRM2			17.2	191.3	0.945487	0.590982	-0.752946	-2.02096	0.211022	0.8722	-0.289124	-0.544316	26.5347	26.1384	26.4193	25.7337	24.947	26.153	24.5485	25.5581	25.8596
A0A140VK54;O95630;C9JK83;F5H5B9;C9JEK5;C9JZ93	A0A140VK54;O95630;C9JK83	STAM-binding protein	STAMBP			30.7	48.076	0.924128	0.599134	-0.134877	-1.97789	0.219417	0.866088	-0.0977109	-0.563203	25.462	25.4542	25.3422	25.177	25.3106	25.3662	25.4509	25.2239	24.8859
A0A140VK56;P37837;F2Z393;B4DID5;Q9UMF8;E9PM01;E9PKI8	A0A140VK56;P37837;F2Z393	Transaldolase	TALDO1			34.4	37.54	0.39706	0.832716	0.141743	0.939182	0.216879	0.869039	0.0769571	0.557507	27.9293	27.6411	27.7776	27.6741	28.0258	28.0733	28.0787	27.8911	28.0343
A0A140VK65;P21281;Q59HF3;B4DFM5;H0YC04;B4DQI9;Q71UA2;B4DWH7;C9JL73;P15313;E5RGH6;C9JNS9;H0YAT8;C9JZ02;H0YC45	A0A140VK65;P21281;Q59HF3;B4DFM5;H0YC04	V-type proton ATPase subunit B, brain isoform	ATP6V1B2			48.1	56.5	1.24832	0.533643	0.281973	2.65896	1.17924	0.518137	0.236874	2.50818	27.5939	27.3945	27.4359	27.6362	27.9255	27.7086	28.0658	27.944	27.971
Q2TU84;A0A140VK69;P17174;B7Z1I2	Q2TU84;A0A140VK69;P17174;B7Z1I2	Aspartate aminotransferase;Aspartate aminotransferase, cytoplasmic	GIG18;GOT1			40.4	46.319	0.147734	0.938629	0.0476106	0.396983	0.891352	0.585734	0.111959	1.91217	26.0714	25.782	26.1466	25.9614	26.1137	26.0677	26.0888	26.1741	26.2157
A0A140VK70;P35998;Q75L23;C9JLS9;B7Z571	A0A140VK70;P35998;Q75L23	26S protease regulatory subunit 7	PSMC2			51	48.633	1.09222	0.525508	0.136321	2.32302	0.0501649	0.967803	0.0102863	0.146096	27.8556	27.7084	27.7681	27.8364	27.9333	27.9714	28.0351	27.8407	27.8961
Q53FK2;A0A140VK72;P48723;B4DQX6;B3KY30	Q53FK2;A0A140VK72;P48723;B4DQX6;B3KY30	Heat shock 70 kDa protein 13	HSPA13			5.7	51.867	0.737429	0.66251	0.364384	1.6083	0.27223	0.844407	0.461149	0.679199	21.982	21.7675	21.5881	21.9336	21.9622	22.535	23.9026	21.889	22.0225
A0A140VK73;Q9NPH2;B3KSG0;B7Z3K3;J3QS51;J3KRH4	A0A140VK73;Q9NPH2;B3KSG0;B7Z3K3	Inositol-3-phosphate synthase 1	ISYNA1			34.6	61.067	1.00448	0.55691	0.140807	2.14102	0.986751	0.558137	0.145684	2.10476	28.245	28.3741	28.359	28.3655	28.5005	28.5346	28.5516	28.5831	28.7029
H7C003;A0A140VK83;Q15435;B5MBZ8;C9JD73;C9J177;H7C3Q5;C9JRC4	H7C003;A0A140VK83;Q15435;B5MBZ8;C9JD73;C9J177	Protein phosphatase 1 regulatory subunit 7	PPP1R7			10.4	38.633	1.71681	0.433614	0.621246	3.79445	0.426563	0.774783	-0.205058	-0.998635	22.5141	22.3438	22.4112	22.8324	23.3487	22.9517	23.0805	22.8175	22.6197
B2RD19;A0A140VK84;Q9HA64;Q6FIG5;B4DE94;I3L139;B4DXG0;I3L2G3;I3L407;I3L3W5;I3L378	B2RD19;A0A140VK84;Q9HA64;Q6FIG5;B4DE94;I3L139;B4DXG0;I3L2G3	Ketosamine-3-kinase	FN3KRP			25.9	34.352	0.0229519	0.996497	-0.01286	-0.0687029	0.780816	0.601832	0.394545	1.69332	25.4748	25.2047	24.851	25.2011	25.2242	25.0667	25.1602	25.5663	25.9491
B4DLK2;G3V213;F8VZG5;F8W1A4;A0A140VK93;P54819;F8VPP1;F8VY04	B4DLK2;G3V213;F8VZG5;F8W1A4;A0A140VK93;P54819;F8VPP1;F8VY04	Adenylate kinase 2, mitochondrial;Adenylate kinase 2, mitochondrial;Adenylate kinase 2, mitochondrial, N-terminally processed	AK2			30.3	13.098	0.0951353	0.966402	-0.0420628	-0.266155	0.357734	0.804779	-0.0854168	-0.858943	24.559	24.1076	24.3869	24.3086	24.1576	24.4611	24.2864	24.1316	24.2531
A0A140VK94;P43487;C9JJ34;B7Z6U1;B4DE76;F6WQW2;C9JXG8;D3DX26;C9JDM3;C9JGV6;C9JIC6;B3KUP2	A0A140VK94;P43487;C9JJ34;B7Z6U1;B4DE76;F6WQW2;C9JXG8;D3DX26;C9JDM3;C9JGV6	Ran-specific GTPase-activating protein	RANBP1			32.3	23.31	1.1918	0.541918	0.388207	2.53535	0.633988	0.67136	0.225217	1.4066	25.8438	25.4859	25.7239	25.8574	26.2289	26.1319	26.5218	26.2328	26.1392
B4DPW5;A0A140VKA0;B7Z6G4;Q9NYG1;E9PGZ1;E7EX44;Q05682;C9J813;B4E3I0;Q6PJM5;Q7Z2Y9;Q05DR4;Q6P707;Q5HY93;C9JEK3	B4DPW5;A0A140VKA0;B7Z6G4;Q9NYG1;E9PGZ1;E7EX44;Q05682;C9J813;B4E3I0;Q6PJM5	Caldesmon	CALD1			29.8	57.413	1.19112	0.541133	0.325867	2.53388	1.56446	0.477842	0.414205	3.40064	26.2478	25.9726	26.074	26.2241	26.5407	26.5072	26.7027	26.8839	26.9281
B4E0U6;A0A140VKA6;P50502;Q1XBU6;B7ZA40;Q0IJ56;H7C3I1;Q3KNR6;Q8NFI4;F6VDH7;Q8IZP2;D6W507;F8WAQ7;Q1XBU7	B4E0U6;A0A140VKA6;P50502;Q1XBU6;B7ZA40;Q0IJ56;H7C3I1;Q3KNR6;Q8NFI4;F6VDH7;Q8IZP2	Hsc70-interacting protein;Putative protein FAM10A5;Putative protein FAM10A4	ST13;ST13P5;ST13P4			21.2	40.161	1.21543	0.539151	0.297133	2.58673	1.28791	0.489773	0.307676	2.74699	25.9783	26.1414	25.9786	26.2513	26.5307	26.2076	26.6422	26.7182	26.5522
A0A140VKA9;P09417;B7Z415;D6RGG7;D6RHJ7;H0Y8F7	A0A140VKA9;P09417;B7Z415;D6RGG7	Dihydropteridine reductase	QDPR			23	25.789	0.121975	0.948651	0.0774434	0.334029	0.0756422	0.954574	-0.0366383	-0.215182	25.7562	25.1927	25.4637	25.2186	25.7306	25.6958	25.5855	25.5069	25.4426
E9PKL9;A0A140VKC8;Q13630;E9PLH9;B3KU96;B4DZW9;E9PP14;A0A0J9YX13;E9PP60	E9PKL9;A0A140VKC8;Q13630;E9PLH9;B3KU96;B4DZW9;E9PP14;A0A0J9YX13;E9PP60	GDP-L-fucose synthase	TSTA3			21.3	29.666	1.85135	0.398267	0.233187	4.16556	0.125395	0.92391	0.0108395	0.342504	24.5432	24.5089	24.3852	24.6571	24.7543	24.7253	24.6975	24.7408	24.731
A0A140VKE1;Q53QE9;A0A087WYS1;E7EUC7;B4DUP2;Q16851;B2RAN1;C9JNZ1;C9JVG3;C9JWG0;C9JQU9;D6W5E6;C9JTZ5;C9JUW1;C9J3M0;F2Z3P4;F8WC70;F2Z3H1	A0A140VKE1;Q53QE9;A0A087WYS1;E7EUC7;B4DUP2;Q16851;B2RAN1;C9JNZ1;C9JVG3	UTP--glucose-1-phosphate uridylyltransferase	UGP2			25.8	55.676	0.183181	0.921313	0.0368945	0.480651	0.149512	0.912143	0.0476952	0.40126	25.5666	25.5371	25.6744	25.7539	25.5382	25.5966	25.8042	25.4802	25.7474
Q53ZP9;A0A140VKE7;B4DZR0;O95757;E9PDE8;B4DXT2;D6RJ96;B3KNM0	Q53ZP9;A0A140VKE7;B4DZR0;O95757;E9PDE8;B4DXT2;D6RJ96;B3KNM0	Heat shock 70 kDa protein 4L	HSPA4L			20.7	94.504	0.0883044	0.970702	0.0411523	0.248464	0.223219	0.865381	0.078118	0.571713	24.571	24.0206	24.1861	24.2633	24.2802	24.3576	24.6432	24.2155	24.2768
A0A140VKE9;Q13409;B4DPZ3;Q59GU5;E7ESD3;E7EMU4;Q9H5W7;B4DX93;E7ET01;E7EUM4;E7ERR6;E7ERH4;Q53SA6;E7EU01;E5RFE1;C9J3E7;E5RJ75;Q75MI9;Q8N542;Q8IY52;Q7Z6M0;A4D1I7;O14576	A0A140VKE9;Q13409;B4DPZ3;Q59GU5	Cytoplasmic dynein 1 intermediate chain 2	DYNC1I2			29	71.456	0.693174	0.682571	0.249114	1.5219	0.0547474	0.968206	-0.0198186	-0.158746	27.0444	26.8112	27.1839	27.0175	27.3882	27.381	27.2333	27.2048	27.2891
A0A140VKF2;O00487;Q53TH1;Q59G89;Q96DE8;Q4ZG77;C9JW37	A0A140VKF2;O00487;Q53TH1;Q59G89	26S proteasome non-ATPase regulatory subunit 14	PSMD14			53.9	34.577	1.74429	0.422704	0.391375	3.86839	0.432439	0.771259	0.13679	1.01041	27.5153	27.5188	27.5218	27.7384	28.0886	27.903	28.1842	28.0787	27.8775
B3KMD4;V9GZ50;A0A140VKH3;Q9ULX6;M0R1Y5;M0QYT7;Q9UF73;M0R010	B3KMD4;V9GZ50;A0A140VKH3;Q9ULX6;M0R1Y5;M0QYT7	A-kinase anchor protein 8-like	AKAP8L			14.2	42.761	0.560627	0.75487	-0.710655	-1.26352	0.657144	0.656646	0.795167	1.4517	24.5926	24.4238	24.054	24.1029	24.2643	22.5712	24.4546	24.5984	24.2708
A0A142CHG9;B3KP89;P09471;Q8N6I9;H3BTM2;A0A1W2PP87;A0A1W2PRJ7;A0A1W2PS82;A0A1W2PP38	A0A142CHG9;B3KP89;P09471;Q8N6I9	Guanine nucleotide-binding protein G(o) subunit alpha	GNAO1			33.9	40.238	1.27107	0.522128	0.296438	2.7094	1.44296	0.480467	-0.559198	-3.10457	25.0669	25.1548	25.0913	25.613	25.2876	25.3016	25.0774	24.5761	24.8711
E9PHI4;A0A146IHP0;A4D2Q0;O94901;A7MCZ7;H0Y742;H0Y6N5;B4E278;H7C2K3;Q5S4N2;C9JK55;C9K051;H7C3X3;H7C019	E9PHI4;A0A146IHP0;A4D2Q0;O94901;A7MCZ7;H0Y742;H0Y6N5;B4E278;H7C2K3	SUN domain-containing protein 1	SUN1;UNC84A			30.7	91.112	0.324649	0.870323	-0.129606	-0.790366	0.502255	0.730407	-0.19537	-1.149	26.3756	26.6632	26.58	26.5803	26.1324	26.5172	26.0354	26.3664	26.2421
A0A158RFU6;P51149;C9J8S3;B4DPH9;C9IZZ0;C9J4V0;C9J592;C9J4S4;C9J7D1	A0A158RFU6;P51149;C9J8S3;B4DPH9;C9IZZ0;C9J4V0;C9J592;C9J4S4	Ras-related protein Rab-7a	RAB7A			58	23.489	1.20116	0.539611	0.180257	2.55564	0.665079	0.654764	0.174408	1.46716	28.103	27.965	28.0882	28.1417	28.2228	28.3326	28.2404	28.3784	28.6015
B3KU60;A0A1B0GTC3;A0A1B0GVH5;Q9C0B1;A0A1B0GTY1;A0A1B0GUC3;A0A1B0GV98;A0A1B0GTC5;A0A1B0GU26;A0A1B0GUY7;B4DHN4;A0A1B0GTI3	B3KU60;A0A1B0GTC3;A0A1B0GVH5;Q9C0B1;A0A1B0GTY1;A0A1B0GUC3;A0A1B0GV98;A0A1B0GTC5;A0A1B0GU26	Alpha-ketoglutarate-dependent dioxygenase FTO	FTO			19.4	58.309	0.201788	0.913156	0.103436	0.523382	0.079629	0.953447	-0.0391267	-0.225732	24.6504	24.0668	24.3697	24.665	24.4128	24.3193	24.6548	24.4506	24.1743
A0A1B0GWJ0;A0A1B0GTJ7;X5D8S6;P30566;Q71UA4;A0A384E0N4;B4DP46;A0A0A6YY92;A8K4X6;A0A096LNY6;A0A1B0GWF8;X5DP48;X5D2Z4;A0A1B0GTG9;B4DUM2;A0A096LNY5;A0A096LPA2;A0A096LNY4;V9GY96;A0A096LP76;B4DEP1;A0A096LP72;X5D7W4;A0A096LP92;X5D7V4;A0A1W2PRX2	A0A1B0GWJ0;A0A1B0GTJ7;X5D8S6;P30566;Q71UA4;A0A384E0N4;B4DP46;A0A0A6YY92;A8K4X6;A0A096LNY6;A0A1B0GWF8;X5DP48;X5D2Z4;A0A1B0GTG9;B4DUM2	Adenylosuccinate lyase	ADSL			31.7	54.465	0.741662	0.659247	0.122932	1.61658	0.360576	0.806816	0.0677834	0.864784	26.8317	26.8925	27.0212	26.9968	26.9767	27.1406	26.9922	27.1354	27.19
A0A1B0GW44;A0A1B0GV23;A0A1B0GVD5;A0A1B0GWE8;V9HWI3;A0A1B0GU92;A0A1B0GU03;P07339;C9JH19;H7C469;A0A1B0GVP3;F8WD96;F8W787;H7C1V0	A0A1B0GW44;A0A1B0GV23;A0A1B0GVD5;A0A1B0GWE8;V9HWI3;A0A1B0GU92;A0A1B0GU03;P07339;C9JH19;H7C469;A0A1B0GVP3;F8WD96;F8W787	Cathepsin D;Cathepsin D light chain;Cathepsin D heavy chain	HEL-S-130P;CTSD			27.4	43.688	0.543705	0.762471	-0.413392	-1.23041	0.181578	0.893151	-0.182451	-0.476933	24.975	24.0005	24.5571	24.4611	23.8943	23.937	24.5839	23.5189	23.6422
A0A1B0GU24;Q9HCJ0;H3BRT3;H7C269;Q8NDV7	A0A1B0GU24;Q9HCJ0	Trinucleotide repeat-containing gene 6C protein	TNRC6C			4.3	202.72	0.392979	0.837627	-0.203648	-0.930912	1.199	0.5248	0.530292	2.55095	22.7893	23.2456	22.9298	22.4405	22.9445	22.9687	23.4217	23.4406	23.0822
A0A1B0GUA3;Q96EK5;A0A1B0GUH6;A0A1B0GU96;A0A1B0GVY9;A0A1B0GTE6;A0A0D9SFK7	A0A1B0GUA3;Q96EK5	KIF1-binding protein	KIAA1279			19.8	74.783	0.000138798	0.99998	-5.8492e-05	-0.000426058	1.12556	0.524	-0.163548	-2.39338	24.8207	25.2758	25.1458	25.1264	25.0616	25.0542	25.0459	24.8517	24.8539
A0A1B0GUI1;Q6GYQ0;H0YJB5;H0YJ04;Q9Y408;Q9H984;A0PJ59	A0A1B0GUI1;Q6GYQ0	Ral GTPase-activating protein subunit alpha-1	RALGAPA1			3.3	280.41	0.829756	0.634272	-0.1272	-1.78975	0.791843	0.603239	0.13318	1.71499	23.9541	23.9286	23.9065	23.7149	23.7524	23.9403	24.0036	23.8947	23.9088
Q5VTI5;A0A1B0GUN5;Q9Y2H5;A5XEJ5;A5XEJ4;A5XEJ7;A5XEJ6;A5XEJ3;A5XEJ2	Q5VTI5;A0A1B0GUN5;Q9Y2H5	Pleckstrin homology domain-containing family A member 6	PLEKHA6			15.9	119.29	0.14125	0.938043	0.0435022	0.381322	0.221655	0.866224	-0.0750465	-0.568215	25.0599	25.3624	25.2353	25.1795	25.4082	25.2005	25.3602	24.983	25.2197
A0A1B0GV05;Q684P5;F2Z357;A0A024RAB5;Q49AP2;A0A0A0MQY8;J3KPC5;X6R8W7;P47736	A0A1B0GV05;Q684P5	Rap1 GTPase-activating protein 2	RAP1GAP2			14.7	85.181	0.462488	0.80127	0.149806	1.07033	0.115836	0.931973	-0.0355053	-0.318722	26.2733	26.194	25.9664	26.5022	26.1591	26.2218	26.3138	26.1916	26.2712
A0A1B0GV09;Q9H9B1;A0A1B0GU48;A0A0C4DGF8;A0A1B0GWF6;A0A0D9SEP2;A0A0D9SFS4;A0A0D9SER3;A0A0D9SFG7;Q71M33;A0A0D9SFX4;A0A1B0GW79;A0PJE0;A0A1W2PPZ7;A0A0D9SEQ1;A0A1B0GVZ8;A0A1B0GUD1	A0A1B0GV09;Q9H9B1;A0A1B0GU48;A0A0C4DGF8	Histone-lysine N-methyltransferase EHMT1	EHMT1			5.1	138.25	1.07977	0.530959	-0.257506	-2.29693	0.0202922	0.989208	-0.00982475	-0.0609132	25.472	25.3736	25.2893	25.248	24.926	25.1882	25.0277	24.944	25.3612
A0A1B0GV47;Q7Z4S6;A0A024R0V9;H0YHT2;Q68D13;H0YI78;H0YIM7;H0YIM6;O75037;Q2UVF0;H0YHG9;B4DMY5	A0A1B0GV47;Q7Z4S6;A0A024R0V9;H0YHT2	Kinesin-like protein KIF21A;Kinesin-like protein	KIF21A			41.3	184.71	0.31051	0.878349	-0.0442098	-0.760709	0.203536	0.879333	-0.0458641	-0.527357	29.282	29.2077	29.3751	29.2354	29.1932	29.3035	29.0366	29.28	29.278
A0A1B0GVZ4;A0A494C085;P06132;Q71UD4;A0A494BZY8;A0A494C0Q8;A0A494C0P4;B4DHV6;A0A494C007;H0Y5R6;Q5T446;A0A1B0GVN9	A0A1B0GVZ4;A0A494C085;P06132;Q71UD4;A0A494BZY8;A0A494C0Q8	Uroporphyrinogen decarboxylase	UROD			15.9	35.704	0.125188	0.946078	-0.0298157	-0.341991	0.360887	0.807505	-0.105391	-0.865424	23.3869	23.4127	23.2956	23.2565	23.2548	23.4945	23.219	23.076	23.3947
A0A1B0GW05;Q2PZI1;H7C3M5;H7C1I8	A0A1B0GW05;Q2PZI1	Probable C-mannosyltransferase DPY19L1	DPY19L1			13.5	84.533	1.14643	0.532764	-0.309997	-2.43777	1.39244	0.477176	0.378249	2.9857	25.9011	26.261	26.2769	25.8832	25.7717	25.8541	26.456	26.1271	26.0607
H3BLV5;A0A1B0GWD1;A8K340;O43602;B4DM53;A0A1B0GUE1;E7EU50;B4DSM9;Q5VZY9;B7Z2T7;O15075;G5E9L9;A0A0U1RR70;Q8N568	H3BLV5;A0A1B0GWD1;A8K340;O43602;B4DM53;A0A1B0GUE1;E7EU50	Neuronal migration protein doublecortin	DCX			31.4	40.044	0.01749	0.999544	-0.00289599	-0.0526598	0.022657	0.988649	0.0041701	0.0678411	25.5864	25.4974	25.4559	25.4843	25.4593	25.5875	25.4501	25.6067	25.4867
A0A1C7CYX9;Q59GB4;Q8NAN9;A9CQZ4	A0A1C7CYX9;Q59GB4					73.1	73.502	0.6338	0.714687	0.0591768	1.40624	0.0975139	0.940269	0.0142136	0.272274	31.222	31.2022	31.1652	31.2149	31.3329	31.2191	31.2196	31.3374	31.2527
A0A1J0GNC2;P23378;A0A1W2PP74;A0A1W2PPB1;Q9HDA3;A0A1W2PQV3;A0A1W2PPK8;A0A1W2PQU6;A0A1W2PPE1	A0A1J0GNC2;P23378;A0A1W2PP74	Glycine dehydrogenase (decarboxylating), mitochondrial	GLDC			12.7	101.39	0.648773	0.706047	0.117334	1.4354	0.452799	0.761815	0.0930513	1.05106	25.6109	25.569	25.4999	25.5321	25.7829	25.717	25.8093	25.8249	25.6769
A0A1K0FUB6;Q8WWM9;K7EMC7;K7EIM9	A0A1K0FUB6;Q8WWM9;K7EMC7	Cytoglobin	CYGB			63.2	21.404	0.321832	0.871278	0.0853723	0.784474	0.150425	0.910888	0.0474631	0.403449	26.4216	26.1891	26.324	26.2304	26.5135	26.4469	26.4042	26.3289	26.6002
A0A1L1UHR1;P21796;B3KTS5;C9JI87;B4DEI3	A0A1L1UHR1;P21796;B3KTS5;C9JI87;B4DEI3	Voltage-dependent anion-selective channel protein 1	VDAC1			73.1	30.772	0.238286	0.901991	0.0517413	0.605178	0.236276	0.856838	0.0732085	0.600737	28.6998	28.9115	28.9717	28.8896	28.9578	28.8909	28.7592	29.1662	29.0324
A0A1L5BXV2;Q96HR9;A8MXN1;A8MWX0;B4DF39	A0A1L5BXV2;Q96HR9;A8MXN1;A8MWX0	Receptor expression-enhancing protein 6;Receptor expression-enhancing protein	REEP6			27.2	20.733	0.388802	0.838836	-0.216986	-0.922434	1.37598	0.474336	-0.583443	-2.94748	27.1039	27.531	27.4925	27.4353	27.2504	26.7907	26.4781	26.6077	26.6403
G3V1S6;B7Z6K2;A0A1L7NY50;A0A1L7NY41;Q10471;B7Z462;F8VUJ3;Q8N4A0	G3V1S6;B7Z6K2;A0A1L7NY50;A0A1L7NY41;Q10471;B7Z462	Polypeptide N-acetylgalactosaminyltransferase;Polypeptide N-acetylgalactosaminyltransferase 2;Polypeptide N-acetylgalactosaminyltransferase 2 soluble form	GALNT2			10.1	60.793	0.0961745	0.965633	-0.0360953	-0.268831	0.357862	0.805437	-0.126506	-0.859205	23.9582	23.7219	24.078	24.0082	23.9185	23.7231	23.5334	23.9482	23.7888
G1UI22;A8MQ02;A0A1P7ZIN0;J3KN01;P55196;Q5TIG5;Q96C95;H0Y7R8;H0Y8L4;H0YA98;H0Y948;H0Y8U8;F8W9I4;E9PFY5	G1UI22;A8MQ02;A0A1P7ZIN0;J3KN01;P55196;Q5TIG5	Afadin	MLLT4			16.8	201.82	0.153476	0.935561	0.0253887	0.410756	1.13827	0.519517	-0.094773	-2.42039	27.2383	27.3707	27.2163	27.3778	27.2625	27.2611	27.2057	27.1951	27.2163
M0R3C8;M0QYH2;A0A1S5RA93;Q96T60;M0QYI1;A0A0D9SFL2;A0A0D9SFD6;A0A0D9SEV0;M0R000;A0A1B0GU66	M0R3C8;M0QYH2;A0A1S5RA93;Q96T60;M0QYI1;A0A0D9SFL2;A0A0D9SFD6	Bifunctional polynucleotide phosphatase/kinase;Polynucleotide 3-phosphatase;Polynucleotide 5-hydroxyl-kinase	PNKP			19.3	49.296	0.801379	0.638939	0.101292	1.73376	0.0201918	0.989056	-0.00514666	-0.0606186	25.1103	25.2023	25.1067	25.1454	25.3099	25.2679	25.1098	25.3479	25.25
A0A1S5UYZ9;A8K5F7;A6NML8;Q17R91;C9J6U3;B7ZLJ0;B3KMJ1;K4DI95;O60879	A0A1S5UYZ9;A8K5F7;A6NML8;Q17R91;C9J6U3;B7ZLJ0;B3KMJ1;K4DI95;O60879	Protein diaphanous homolog 2	DIAPH2			2	124.3	0.444258	0.80958	-0.0680593	-1.03404	0.391691	0.793727	-0.985406	-0.928299	25.9856	26.0078	25.8588	25.9752	25.8258	25.8471	22.7832	25.8061	26.1024
A0A1S5UZH2;Q8TDZ2;H0Y6Z4;Q6ZMJ8;Q5TED7;H0UI45;B4DJ91	A0A1S5UZH2;Q8TDZ2	Protein-methionine sulfoxide oxidase MICAL1	MICAL1			23.6	116.84	0.113313	0.951976	0.0217654	0.312394	0.890691	0.58504	0.141645	1.91085	26.6975	26.6827	26.7979	26.7919	26.8215	26.6299	26.9777	26.8466	26.844
A0A1S5UZH4;Q14CA1;C9JYY6;Q92823;B7Z670;F8W775;Q4KMQ7;A0A087X2B3;Q75ML9;C9JH43;A0A1B1PFW4;Q6QRP2;C9J8B6;C9JF43;B3KRX0;B4DFP9	A0A1S5UZH4;Q14CA1;C9JYY6;Q92823;B7Z670;F8W775;Q4KMQ7;A0A087X2B3	Neuronal cell adhesion molecule	NRCAM			16.1	129.29	0.379397	0.841361	-0.134378	-0.903297	1.05235	0.537359	0.324924	2.23977	25.0779	25.2448	25.2432	24.8532	25.3187	24.9908	25.3174	25.3545	25.4656
A0A1U9X609;Q8NE71;Q2L6I2;Q59F96;H0YGW7;B4DNU2;Q5STZ8;A0A0G2JIC2;A0PJ72	A0A1U9X609;Q8NE71;Q2L6I2;Q59F96;H0YGW7	ATP-binding cassette sub-family F member 1	ABCF1			34.3	95.925	0.240411	0.902757	-0.0737368	-0.609866	0.215417	0.869728	-0.023997	-0.554221	28.9106	28.5336	28.5766	28.6405	28.5844	28.5746	28.4997	28.6167	28.6112
B0S7P4;A0A1U9X819;Q9Y676;B4DFG6;A0A0G2JIC6	B0S7P4;A0A1U9X819;Q9Y676;B4DFG6;A0A0G2JIC6	28S ribosomal protein S18b, mitochondrial	MRPS18B			15.5	29.395	0.20901	0.908177	0.113134	0.53977	0.248649	0.851295	0.118817	0.627969	24.4166	24.7989	24.7806	24.5445	25.1058	24.6852	24.7597	24.8773	25.055
A0A1U9X8F2;A0A1U9X8F1;Q06587;A0A024RCR9;B4DW57;B4DVB5	A0A1U9X8F2;A0A1U9X8F1;Q06587;A0A024RCR9;B4DW57;B4DVB5	E3 ubiquitin-protein ligase RING1	RING1			14	42.429	0.315035	0.875304	0.0893345	0.770226	0.374301	0.805192	-0.131017	-0.892897	24.1255	23.9588	23.8452	24.0554	24.2139	23.9282	24.0595	24.0526	23.6923
Q9NPK3;Q96BC0;O76046;A0A1U9X8J6;A0A1U9X8J2;A0A1U9X8J1;A0A1U9X8J0;A0A1U9X8I9;A0A1U9X8I7;Q15477;B4DM01;B4E0N1;B4DSY1;A0A024RCU1;Q59F56;H7C5N0;B4DF09;B4E0B4;A0A097PAY3;F8WDE8;H7C4L3	Q9NPK3;Q96BC0;O76046;A0A1U9X8J6;A0A1U9X8J2;A0A1U9X8J1;A0A1U9X8J0;A0A1U9X8I9;A0A1U9X8I7;Q15477;B4DM01;B4E0N1;B4DSY1;A0A024RCU1;Q59F56	Helicase SKI2W	SKIV2L;SKI2W			17.1	137.62	0.16196	0.933089	-0.0582727	-0.430945	0.938066	0.573857	0.150678	2.00597	26.2106	26.0203	25.8145	26.0774	25.9653	25.8279	26.0952	26.1484	26.0791
A0A1U9X9A9;A0A1U9X999;A0A1U9X996;A0A1U9X993;A0A1U9X985;A0A1U9X982;A0A1U9X977;A0A1U9X975;A0A1U9X972;A0A1U9X9A5;A0A1U9X987;A0A1U9X998;A0A1U9X988;A0A1U9X974;P48634;B4DZ56;B4DLY2;B4DQ12	A0A1U9X9A9;A0A1U9X999;A0A1U9X996;A0A1U9X993;A0A1U9X985;A0A1U9X982;A0A1U9X977;A0A1U9X975;A0A1U9X972;A0A1U9X9A5;A0A1U9X987;A0A1U9X998;A0A1U9X988;A0A1U9X974;P48634	Protein PRRC2A	PRRC2A			13.3	228.83	1.10361	0.525316	-0.200471	-2.34697	0.114484	0.931914	0.0225627	0.315335	26.4645	26.2345	26.2472	26.1223	26.1829	26.0395	26.2121	26.0227	26.1777
A0A1U9XBF2;A0A1U9XBE3;A0A1U9XBE0;A0A1U9XBD4;A0A1U9XBC2;A0A1U9XBC1;A0A1U9XBC0;A0A1U9XBB2;Q14676;A0A1U9XBE1;A0A1U9XBD9;A0A1U9XBC3;B4DYH4;A2AB05;A1Z5I7;A1Z5I6;H0Y6Z8;A2AB07;A2AB06;A0A087X0R2;A1Z5I8;B4DQD0	A0A1U9XBF2;A0A1U9XBE3;A0A1U9XBE0;A0A1U9XBD4;A0A1U9XBC2;A0A1U9XBC1;A0A1U9XBC0;A0A1U9XBB2;Q14676;A0A1U9XBE1;A0A1U9XBD9;A0A1U9XBC3;B4DYH4	Mediator of DNA damage checkpoint protein 1	MDC1			24.6	226.61	0.518508	0.778169	0.0395667	1.18098	0.652399	0.661308	-0.119707	-1.44246	27.1179	27.0507	27.065	27.0933	27.0886	27.1705	27.1489	26.9597	26.8846
A0A2R8Y5F1;A0A2R8YGU4;X5D9D6;X5D7Q2;X5D2U8;H3BMQ0;A0A2R8YDZ2;A0A2R8Y7X5;A0A2R8YDR3;A0A2R8Y7C8;A0A2R8YGD6;A0A1V1FWL6;P49815;A0A2R8Y6C9;A0A1V1FWM5;A0A1V1G0E9;A0A386NCL5;B3KSR9;B3KWH7;A0A1V1G0D9;A0A1V1FNX9;A0A1V1FI06;A0A1V1FTF4;A0A1V1FGH9;X5DP08;X5DRA7;I3L3B1;A0A1V1FR23;A0A2R8Y692;Q5HYF7;X5DP61;X5D7S4;X5D7T9;X5D9F9;A0A2R8Y670;A0A2Z3J2W5;A0A2R8Y5B2;X5D2X0;H3BQK4;A0A1V1FK96;A0A2R8YGE6;A0A1V1FNX1;A0A2R…	A0A2R8Y5F1;A0A2R8YGU4;X5D9D6;X5D7Q2;X5D2U8;H3BMQ0;A0A2R8YDZ2;A0A2R8Y7X5;A0A2R8YDR3;A0A2R8Y7C8;A0A2R8YGD6;A0A1V1FWL6;P49815;A0A2R8Y6C9;A0A1V1FWM5;A0A1V1G0E9;A0A386NCL5;B3KSR9	Tuberin	TSC2			5.5	193.03	0.00706423	0.997742	0.00349744	0.0215146	0.473851	0.748758	-1.14494	-1.09288	24.15	24.4886	24.2373	24.5011	24.0636	24.3218	21.0826	23.9922	24.3768
A0A1W2PNP0;Q969N2;A0A1W2PP57;A0A1W2PPC3;A0A1W2PPS0;A0A1W2PPR6;A0A1W2PQN1;A0A1W2PRZ8;A0A1W2PR92;A0A1W2PRH2;B7ZAP3;B7Z1N3;F6W983;B7Z3L1;B7Z1F1;A0A1W2PP53;B7Z4T7;H7C2Y2;A0A1W2PQ29;A0A1W2PPI8;A0A1W2PP13;A0A1W2PPQ7;A0A1W2PQY1;A0A1W2PRG1;A0A1W2PNW9;A0A1W2PQ52;A0A1W2PRV7;A0A1W2PSC5;A0A1W2PRH8;A0A1W2PPU8;A0A1W2PR70;A0A1W2PR73;A0A1W2PPK4;A0A1W2PR34;A0A1W2PP91;A0A1W2PQA4;A0A1W2PR22;B7Z7C5;A0A1W2PP03;A0A1W2…	A0A1W2PNP0;Q969N2;A0A1W2PP57;A0A1W2PPC3;A0A1W2PPS0;A0A1W2PPR6;A0A1W2PQN1;A0A1W2PRZ8;A0A1W2PR92;A0A1W2PRH2;B7ZAP3;B7Z1N3;F6W983;B7Z3L1;B7Z1F1;A0A1W2PP53;B7Z4T7;H7C2Y2;A0A1W2PQ29;A0A1W2PPI8;A0A1W2PP13;A0A1W2PPQ7	GPI transamidase component PIG-T	PIGT			15	65.981	0.120479	0.950045	-0.0571677	-0.33031	0.787465	0.601505	-0.158272	-1.70638	26.9517	27.472	27.1975	27.2673	26.9826	27.1998	26.9421	26.9734	27.0593
A0A1W2PNV4;E9PF58;Q75MY0;F8WFD3	A0A1W2PNV4;E9PF58		ARPC1A			30.1	75.872	0.272811	0.897631	0.0426299	0.680449	0.0251723	0.988189	0.0141354	0.0751731	28.2209	28.2861	28.4095	28.3918	28.2921	28.3606	27.9951	28.4971	28.5946
A0A1W2PNX8;Q9H3U1	A0A1W2PNX8;Q9H3U1	Protein unc-45 homolog A	UNC45A			19.9	118.39	0.783825	0.645651	-0.0832856	-1.69923	0.385253	0.797653	0.070645	0.915222	26.4743	26.4163	26.5475	26.4301	26.3341	26.4239	26.3781	26.4156	26.6064
B7ZLC8;A0A1W2PNZ9;Q15652	B7ZLC8;A0A1W2PNZ9;Q15652	Probable JmjC domain-containing histone demethylation protein 2C	JMJD1C			1.9	263.15	0.305851	0.880483	-0.139315	-0.750888	0.0638596	0.960411	-0.078399	-0.183601	22.9363	22.6825	22.5921	22.8966	22.3819	22.5145	21.7683	22.6655	23.1241
A0A1W2PPG5;A0A1W2PPP5;I3L4Z6;A0A1W2PPG1;A0A1W2PRC2;A0A1W2PQM3;A0A1W2PS81;E7EQ34;I3NI02;O14653;A0A1W2PNV3;A0A1W2PR23;A0A1W2PPW8;A0A1W2PQ77;A0A1W2PR02;A0A1W2PS12;A0A1X7SBU8;A0A1W2PRL0;A0A1W2PRV0;A0A1W2PRP7;A0A1W2PQP2;B4E141;A0A1W2PQ38;A0A1W2PQ06;I3L1K7;A0A1W2PQE0;A0A1W2PPJ0;A0A1W2PRE6;I3L0K1;A0A1W2PQ12;A0A1W2PQS3;A0A1W2PQQ4;A0A1W2PRD0	A0A1W2PPG5;A0A1W2PPP5;I3L4Z6;A0A1W2PPG1;A0A1W2PRC2;A0A1W2PQM3;A0A1W2PS81;E7EQ34;I3NI02;O14653;A0A1W2PNV3;A0A1W2PR23;A0A1W2PPW8;A0A1W2PQ77;A0A1W2PR02;A0A1W2PS12;A0A1X7SBU8;A0A1W2PRL0;A0A1W2PRV0;A0A1W2PRP7;A0A1W2PQP2;B4E141;A0A1W2PQ38;A0A1W2PQ06;I3L1K7;A0A1W2PQE0;A0A1W2PPJ0;A0A1W2PRE6;I3L0K1	Golgi SNAP receptor complex member 2	GOSR2			31.2	23.237	0.142775	0.939328	0.0599442	0.385015	0.131729	0.921019	-0.0590865	-0.358102	24.8561	24.6457	24.4371	24.8966	24.6517	24.5705	24.8918	24.6143	24.4355
A0A1W2PPH1;A0A1W2PQH3;P23368;A0A1W2PR68;A0A1W2PQT3;A0A1W2PQY8;A0A1W2PQ37;A0A1W2PQF8;A0A1W2PRS2;A0A1W2PRY9;A0A1W2PQH4;A0A1W2PPY2;A0A1W2PRH1	A0A1W2PPH1;A0A1W2PQH3;P23368;A0A1W2PR68;A0A1W2PQT3;A0A1W2PQY8;A0A1W2PQ37;A0A1W2PQF8	NAD-dependent malic enzyme, mitochondrial	ME2			48.7	61.221	0.701114	0.6771	0.0758953	1.53739	0.737599	0.61967	-0.116272	-1.60863	27.4992	27.4332	27.4177	27.5292	27.4507	27.598	27.5244	27.3332	27.3714
A0A1X7SBZ2;A0A1W2PQ51;Q59F66;Q92841;B4DZQ7;Q9UQL5;A0A0U1RQJ0	A0A1X7SBZ2;A0A1W2PQ51;Q59F66;Q92841;B4DZQ7	Probable ATP-dependent RNA helicase DDX17	DDX17			46.1	80.253	1.14556	0.532298	-0.146172	-2.43592	0.382177	0.799709	-0.0666447	-0.908961	29.7458	29.7547	29.8023	29.6013	29.5336	29.7293	29.4864	29.5366	29.6413
A0A1W2PQJ7;Q7Z5J4;A8MXE8;J3QLL5	A0A1W2PQJ7;Q7Z5J4;A8MXE8	Retinoic acid-induced protein 1	RAI1			5.9	183.94	0.440823	0.805526	0.651723	1.02718	0.790515	0.602044	-0.627684	-1.71238	23.3048	21.5826	23.6152	23.5822	23.4798	23.3957	23.563	22.6535	22.3582
A0A1W2PQS6;A0A2R8Y6L3;F6U211;Q59GE4;A0A2R8Y7H1;A0A2R8YFH6;P46783;S4R435;Q14489;O95989;Q9NQ39	A0A1W2PQS6;A0A2R8Y6L3;F6U211;Q59GE4;A0A2R8Y7H1;A0A2R8YFH6;P46783;S4R435	40S ribosomal protein S10	RPS10;RPS10-NUDT3			13.1	33.14	0.563831	0.754068	0.475911	1.26979	0.260506	0.848565	0.38635	0.653833	24.5412	24.3537	24.871	25.5843	25.1923	24.4171	26.3919	25.155	24.8057
B4DPV9;A8MYT4;A0A1W2PS05;Q8NEB9;K7ENH3;K7EIV6;K7EKH3;M0R308	B4DPV9;A8MYT4;A0A1W2PS05;Q8NEB9	Phosphatidylinositol 3-kinase;Phosphatidylinositol 3-kinase catalytic subunit type 3	PIK3C3			13.8	94.398	0.136645	0.940816	-0.041652	-0.370126	0.972793	0.560282	0.213123	2.07632	25.0316	25.3168	25.1811	25.2639	24.9985	25.1422	25.314	25.2506	25.4794
A0A1X7SBR9;Q8TE59;B3KV14	A0A1X7SBR9;Q8TE59;B3KV14	A disintegrin and metalloproteinase with thrombospondin motifs 19	ADAMTS19			4.3	134.76	0.250182	0.901237	0.0669708	0.631327	1.07692	0.530518	0.0857582	2.29095	24.5283	24.3656	24.1694	24.4471	24.4395	24.3776	24.447	24.5431	24.5314
A0A223PQH6;P51610;A6NEM2;Q05C05;H7C1C4;B4DKE2;Q53FE7;Q9Y5Z7	A0A223PQH6;P51610;A6NEM2	Host cell factor 1;HCF N-terminal chain 1;HCF N-terminal chain 2;HCF N-terminal chain 3;HCF N-terminal chain 4;HCF N-terminal chain 5;HCF N-terminal chain 6;HCF C-terminal chain 1;HCF C-terminal chain 2;HCF C-terminal chain 3;HCF C-terminal chain 4;HCF C-terminal chain 5;HCF C-terminal chain 6	HCFC1			31.4	208.76	0.792687	0.642597	-0.0925687	-1.71665	0.725904	0.623093	0.109018	1.58578	29.0309	28.918	29.0223	28.8531	28.863	28.9774	29.058	28.895	29.0675
A0A248RGE3;Q5RKT7;B2RDW1;P62979;A0A2R8Y422;J3QS39;J3QTR3;Q8WYN9;F5H6Q2;Q3MIH3;F5GYU3;F5H2Z3;F5H265;Q5UGI3;B4DV12;F5H388;F5H747;F5GXK7;J3QKN0;Q5U5U6;Q5PY61;Q9UFQ0;Q96C32;Q96MH4;L8B4I8;L8B196;Q96H31;L8B4R0;A8K674;L8B4Z6;L8B4M0;L8B4J3;Q66K58;Q59EM9;P62987;P0CG47;P0CG48;M0R1V7;Q49A90;M0R1M6;M0R2S1;J3QSA3;F5GZ39	A0A248RGE3;Q5RKT7;B2RDW1;P62979;A0A2R8Y422;J3QS39;J3QTR3;Q8WYN9;F5H6Q2;Q3MIH3;F5GYU3;F5H2Z3;F5H265;Q5UGI3;B4DV12;F5H388;F5H747;F5GXK7;J3QKN0;Q5U5U6;Q5PY61;Q9UFQ0;Q96C32;Q96MH4;L8B4I8;L8B196;Q96H31;L8B4R0;A8K674;L8B4Z6;L8B4M0;L8B4J3;Q66K58;Q59EM9;P62987;P0CG47;P0CG48;M0R1V7;Q49A90;M0R1M6;M0R2S1	Ubiquitin-40S ribosomal protein S27a;Ubiquitin;40S ribosomal protein S27a;Ubiquitin-60S ribosomal protein L40;Ubiquitin;60S ribosomal protein L40;Polyubiquitin-B;Ubiquitin;Polyubiquitin-C;Ubiquitin	RPS27A;HEL112;UBB;UBC;UBA52;DKFZp434K0435;UbC			55.9	16.717	0.0897819	0.969114	-0.0901839	-0.252306	0.444181	0.76344	-0.285191	-1.03388	31.0013	30.3538	30.2346	30.971	30.1368	30.2114	30.0148	30.2008	30.248
A0A286YF22;O43175;A0A2C9F2M7;V9HW79;B3KSC3;A0A286YFL2;A0A286YFA2;Q9UMY2;Q8N5M8;A0A286YFM8;A0A286YF78;Q9UMY3;A0A286YER3;A0A286YFC8;A0A286YFB2;A0A286YFE1;A0A286YFF3;A0A286YF34;A0A286YFK5;Q96RV9;Q96RV7;Q96RV6;Q96RV5	A0A286YF22;O43175;A0A2C9F2M7;V9HW79;B3KSC3;A0A286YFL2;A0A286YFA2;Q9UMY2;Q8N5M8;A0A286YFM8	D-3-phosphoglycerate dehydrogenase	PHGDH;HEL-S-113;PGDH3			47.9	55.938	0.813632	0.644687	0.0750383	1.75791	0.555237	0.698016	0.0844828	1.25298	29.8279	29.791	29.8533	29.8241	29.9203	29.953	29.8903	29.9791	30.0814
A0A286YFD6;D6W4Z6;P31350;C9JXC1;B3KS26;Q9UKM0;Q8N6S3	A0A286YFD6;D6W4Z6;P31350;C9JXC1	Ribonucleoside-diphosphate reductase subunit M2	hCG_23833;RRM2			18.7	42.906	0.429149	0.81088	-0.358889	-1.00382	0.0574416	0.96528	0.0521056	0.166136	24.479	24.6861	25.1312	25.0092	24.1141	24.0964	24.3699	24.3735	24.6326
A0A2C9F2P4;A0A286YFF7;P50897;B4DWU3;Q5T0S4;A0A286YFE3;A0A286YFL8;E9PSE5;E9PK48;E9PIA8	A0A2C9F2P4;A0A286YFF7;P50897;B4DWU3;Q5T0S4;A0A286YFE3;A0A286YFL8	Palmitoyl-protein thioesterase 1	PPT1			22.6	34.136	1.41523	0.500233	-0.431838	-3.03903	0.764069	0.603649	-0.460241	-1.66046	23.7215	23.6748	23.723	23.538	23.0547	23.231	23.1834	22.3681	22.8916
B7ZM73;A0A286YFF8;Q7Z3U7;B3KMU1;F8VZV1;Q6P148;B3KW06	B7ZM73;A0A286YFF8;Q7Z3U7;B3KMU1;F8VZV1	Protein MON2 homolog	MON2			2.4	187.32	0.0512893	0.98339	0.0158799	0.149209	0.399052	0.792665	-0.321088	-0.943216	23.7114	23.4679	23.3543	23.4974	23.5349	23.5489	22.535	23.6378	23.4452
B5MDE0;A0A291FGD9;Q96AA3;C9JP01	B5MDE0;A0A291FGD9;Q96AA3	Protein RFT1 homolog	RFT1			7.4	55.835	0.125434	0.946002	-0.0370337	-0.3426	0.168595	0.900881	-0.0348091	-0.446604	25.6718	26.0018	25.8993	25.7466	25.8084	25.9068	25.669	25.8824	25.806
A0A2P9DU05;O75116;E9PF63;Q14DU5;B4DRJ9;D6REE7;C9JFJ0	A0A2P9DU05;O75116;E9PF63;Q14DU5;B4DRJ9	Rho-associated protein kinase 2	ROCK2			26.4	160.9	1.13441	0.526732	-0.196793	-2.41216	0.256767	0.850563	-0.0755825	-0.645701	28.3255	28.5756	28.4434	28.318	28.1866	28.2494	27.9544	28.2798	28.2931
A0A2R8Y2A8;Q68CN5;Q13367;B3KUS4;F5GWU4;F5GYB0	A0A2R8Y2A8;Q68CN5;Q13367;B3KUS4	AP-3 complex subunit beta-2	DKFZp686D17136;AP3B2			11.3	123.91	0.270991	0.898494	0.0661081	0.676528	0.112935	0.932661	0.051211	0.311446	23.6769	23.3412	23.4786	23.5637	23.5529	23.5785	23.2883	23.7973	23.7631
B4DYU4;A0A2R8Y2F6;A8KA75;Q4LE51;P42336;B4DLX6	B4DYU4;A0A2R8Y2F6;A8KA75;Q4LE51;P42336;B4DLX6	Phosphatidylinositol 4,5-bisphosphate 3-kinase catalytic subunit alpha isoform	PIK3CA variant protein;PIK3CA			4.7	110.12	0.517219	0.777589	-0.133219	-1.17845	0.62429	0.680536	0.212522	1.38772	23.3054	23.6475	23.3596	23.322	23.3609	23.2299	23.7907	23.2821	23.4775
A0A2R8Y3N3;B2R7G6;A0A2R8Y5P7;P49590;A0A2R8Y6I1;D6RB22;B4DDN8;B4DQ67;B4DSY5;D6RJE6;A0A2R8Y5E8;A0A2R8Y4X6	A0A2R8Y3N3;B2R7G6;A0A2R8Y5P7;P49590;A0A2R8Y6I1;D6RB22;B4DDN8;B4DQ67;B4DSY5	Probable histidine--tRNA ligase, mitochondrial	HARS2			21.6	53.235	0.195694	0.914092	0.0841999	0.509468	1.23673	0.51107	-0.130181	-2.63342	24.9366	24.4107	24.5454	24.7797	24.6181	24.7476	24.5841	24.5824	24.5884
O94789;E7EMI5;A0A2R8Y443;A0A2R8YDF3;A0A2R8Y6L5;A0A2R8Y6I6;Q13627;A0A2R8YEY4;M0R2X3;M0R131;B4DXU2;A0A024R0J6;A0A024R0M8;B3KQI0;A0A024R0I0;Q9Y463	O94789;E7EMI5;A0A2R8Y443;A0A2R8YDF3;A0A2R8Y6L5;A0A2R8Y6I6;Q13627;A0A2R8YEY4;M0R2X3;M0R131;B4DXU2;A0A024R0J6;A0A024R0M8;B3KQI0;A0A024R0I0;Q9Y463	Dual specificity tyrosine-phosphorylation-regulated kinase 1A;Dual specificity tyrosine-phosphorylation-regulated kinase 1B	MNB/DYRK;DYRK1A;DYRK1B			16.5	16.331	0.465419	0.800374	-0.268759	-1.07615	0.0402748	0.976398	0.0457605	0.118433	23.1638	22.9736	22.9212	22.8796	22.2884	23.0844	23.1709	23.0241	22.1947
A0A2R8Y7S2;A7E2E1;A0A2R8Y4P4;Q9HBD4;B9EGQ8;P51532;A0A0A0MT49;A0A2R8YGG3;A0A2R8Y440;A0A2R8YG32;A0A2R8Y7F3;A0A2R8Y4C5;Q59FZ6;A0A2R8YGP5;A0A2R8Y6N0;A0A2R8YF58;A0A2R8Y7Y7;A0A2R8YF80;A0A2R8Y6V2;A0A2R8Y526;A0A2R8YDA1;B4E0F1;B4DSI8;B3KNW7;A0A2R8Y523;A0A2R8YCY3;A0A2R8YFV8;A5D6X0;A0A2R8Y4R6;K7EQF0;A0A2R8Y5K3;B4DSC8;A0A2R8YFK5;K7EP28;A0A0U1RQE1;A0A0U1RRG6;A0A2R8YF38;A0A2R8Y7R0;A0A0U1RRF5;A0A0U1RRD6;A0A0U1R…	A0A2R8Y7S2;A7E2E1;A0A2R8Y4P4;Q9HBD4;B9EGQ8;P51532;A0A0A0MT49;A0A2R8YGG3;A0A2R8Y440;A0A2R8YG32;A0A2R8Y7F3;A0A2R8Y4C5;Q59FZ6;A0A2R8YGP5;A0A2R8Y6N0;A0A2R8YF58;A0A2R8Y7Y7;A0A2R8YF80;A0A2R8Y6V2;A0A2R8Y526;A0A2R8YDA1;B4E0F1;B4DSI8	Transcription activator BRG1	SMARCA4			32.3	184.85	1.59074	0.439782	-0.246199	-3.46672	0.572553	0.690664	-0.13677	-1.28683	30.2636	30.2521	30.2599	30.051	29.8748	30.1112	29.823	29.7726	30.0312
A0A2R8YDM9;A0A2R8Y5A6;H0YH87;A0A2R8Y7P6;F8WB06;Q2M2R5;V9GY86;A0A2R8Y7E6;Q99700;F8VQP2;B3KT59;F8W0B5;F8VRK6;F8VVY6;A0A2R8YGV1;F8WB05	A0A2R8YDM9;A0A2R8Y5A6;H0YH87;A0A2R8Y7P6;F8WB06;Q2M2R5;V9GY86;A0A2R8Y7E6;Q99700;F8VQP2;B3KT59	Ataxin-2	ATXN2			26.1	105.13	0.133312	0.943238	0.0353928	0.361983	1.38081	0.482551	-0.184947	-2.95867	27.1437	27.143	27.4214	27.3077	27.2969	27.2096	27.0041	27.1888	27.0665
A0A2R8YEY5;A0A2R8YEZ4;Q96HT3;A0A2R8Y5D3;O15160;D6RDJ3;E7EQB9;H0Y723;B4DEC2;A0A2R8Y8D6	A0A2R8YEY5;A0A2R8YEZ4;Q96HT3;A0A2R8Y5D3;O15160;D6RDJ3;E7EQB9	DNA-directed RNA polymerases I and III subunit RPAC1	POLR1C			27.8	32.917	0.354924	0.855058	-0.0673027	-0.853159	0.439646	0.766344	-0.851847	-1.02483	24.2952	24.362	24.3912	24.141	24.3166	24.3889	21.7747	24.2334	24.2828
A0A2R8YHI9;A0A2R8Y5Q8;Q15813;A0A2R8YFL4;A0A2R8Y4V6;A0A2U3TZJ6;A0A2R8Y7E7;A0A2R8YER9;A0A2R8Y809;A0A2R8Y6Q1;A0A2R8Y784;A0A2R8YFM3;A0A2R8Y897;A0A2R8Y5H6;A0A2R8Y6L2;A0A2R8Y787;A0A2R8Y4P2;A0A2R8Y6G3;A0A2R8Y4E7;B7Z4X8;A0A2R8YF12;A0A2R8Y7H8;A0A2R8YH53;A0A2R8Y597	A0A2R8YHI9;A0A2R8Y5Q8;Q15813;A0A2R8YFL4;A0A2R8Y4V6;A0A2U3TZJ6;A0A2R8Y7E7;A0A2R8YER9;A0A2R8Y809;A0A2R8Y6Q1;A0A2R8Y784;A0A2R8YFM3	Tubulin-specific chaperone E	TBCE			30	58.386	0.512819	0.78222	0.0609913	1.16979	0.0100689	0.993476	-0.00452677	-0.0305629	25.2043	25.3252	25.2008	25.2924	25.2554	25.3655	25.0222	25.3691	25.5083
B0YJ88;A0A2R8Y5S7;P35241;A0A2R8Y7M3;B7Z2S7;Q6PKD3;Q05CU6;E9PKN5;Q9NST9;A0A2R8Y4H6	B0YJ88;A0A2R8Y5S7;P35241;A0A2R8Y7M3;B7Z2S7;Q6PKD3;Q05CU6	Radixin	RDX			23.3	68.563	0.113841	0.952959	-0.0477848	-0.31372	0.394136	0.794635	0.0656904	0.933258	25.5902	25.139	25.1685	25.2269	25.3376	25.1899	25.4181	25.2304	25.3028
A0A2R8Y6S3;Q5FBW8;C9J167;P54278;B4DGM0	A0A2R8Y6S3;Q5FBW8;C9J167;P54278;B4DGM0	Mismatch repair endonuclease PMS2	PMS2			8	81.331	1.14813	0.53397	-0.119361	-2.44142	2.42728	0.4264	0.124034	6.06208	23.735	23.6816	23.8337	23.5983	23.6676	23.6263	23.762	23.7523	23.7501
Q7Z503;B7ZAF6;B4DRV2;A0A2R8YDQ9;E5KS60;E5KS55;Q6N0B1;A0A2R8Y6Y7;Q9P2R7;Q5T9Q5;B4DY87;B7Z9S6;A0A0S2Z511;Q5T9Q8;A0A0U1RQF8;A0A2R8Y5P6;A0A2R8Y6E6;A0A0U1RRI1;Q9Y4T0;A0A0U1RQL1;A0A0U1RQU7;A0A2R8Y5P4	Q7Z503;B7ZAF6;B4DRV2;A0A2R8YDQ9;E5KS60;E5KS55;Q6N0B1;A0A2R8Y6Y7;Q9P2R7;Q5T9Q5;B4DY87;B7Z9S6;A0A0S2Z511	Succinyl-CoA ligase subunit beta;Succinyl-CoA ligase [ADP-forming] subunit beta, mitochondrial	SUCLA2;DKFZp686D0880			16.6	43.61	0.167191	0.929602	-0.0411784	-0.4433	0.775572	0.602217	-0.188789	-1.68302	25.5825	25.5221	25.5991	25.5234	25.3727	25.684	25.4131	25.2041	25.3966
A0A2R8Y7B1;D6W5D1;Q3V6T2;A0A2R8Y4X4;A0A2R8Y4W8;A0A2R8YG73;A0A2U3TZV9;A0A2R8YCU9;A0A2R8Y885;A0A2R8Y820;A0A2R8Y5D7;Q9ULK8;Q6DCA5;H0Y470;A0A2R8YGU1;H7C2C6;Q9NW05;O14997;H0Y7U8;A0A087WXD9;Q9UI01;A0A2R8YG52;A0A2R8YDS8;A0A2R8Y7D4;A0A2R8YCW0;A0A2R8Y4Z5;B3KW94;H0Y7K3;B4DSN0;A0A2R8Y7D9;Q86YH1;A0A2R8Y6B2;Q6PAV0	A0A2R8Y7B1;D6W5D1;Q3V6T2;A0A2R8Y4X4;A0A2R8Y4W8;A0A2R8YG73;A0A2U3TZV9;A0A2R8YCU9;A0A2R8Y885;A0A2R8Y820;A0A2R8Y5D7;Q9ULK8;Q6DCA5;H0Y470;A0A2R8YGU1;H7C2C6	Girdin	KIAA1212;CCDC88A			4.2	185.48	0.711337	0.676126	-0.149839	-1.55733	0.319944	0.821395	-0.257408	-0.780522	25.1313	25.0424	24.8194	24.8548	24.8005	24.8883	23.933	24.9307	24.9077
B1ALA9;Q53FW2;A0A2R8Y7H4;P60891	B1ALA9;Q53FW2;A0A2R8Y7H4;P60891	Ribose-phosphate pyrophosphokinase 1	PRPS1			31.2	31.392	0.518078	0.777863	0.177385	1.18013	0.462768	0.757687	-0.141906	-1.07089	25.5159	25.2177	25.217	25.6858	25.5014	25.2957	25.2203	25.4574	25.3794
E7ETD6;E9PE19;A0A2R8Y7Q1;Q12830;F5GXF5;J3QQK4;Q9H5E0;J3QQQ8;J3KSK9;B4DJV8;A0A0A0MR81;B4DDK2;B4DM40	E7ETD6;E9PE19;A0A2R8Y7Q1;Q12830;F5GXF5	Nucleosome-remodeling factor subunit BPTF	BPTF			4.6	308.07	0.683365	0.690475	-0.144287	-1.50278	0.574612	0.691732	-0.091877	-1.29085	25.299	25.1077	25.3936	25.0971	25.2123	25.058	25.1081	24.9266	25.0572
A0A2R8Y7R9;Q13136;Q59FZ5;A0A1B0GVT3;H0YDW2;H0YIJ4;H0YHJ4;H0YHK3;B7Z7Y5;G3V200;Q4LE62;O75334;B3KVS8;B3KN22;E9PJZ7;B4DIS5;M0QZB5;O75145	A0A2R8Y7R9;Q13136;Q59FZ5;A0A1B0GVT3;H0YDW2	Liprin-alpha-1	PPFIA1			6.9	138.52	0.250796	0.901988	0.0979315	0.632669	0.495175	0.738456	-0.173047	-1.13504	23.7432	23.8285	23.9223	24.1399	23.6491	23.9989	23.6871	23.8387	23.743
A0A2R8Y7Y3;Q4VB86;A0A2R8YD30;Q1WWM3;Q59F12;P11171;A0A2U3TZH6;A0A3B3ITP0;Q4VB87;Q29RX4;A0A2R8Y6D0;A0A2R8Y420;A0A2R8Y7N0;A0A2R8YFR9;A0A2R8Y6G5;A0A2R8Y570;A0A2R8Y5G2;A0A2R8Y5Z6;A0A3B3IU06;A0A2R8YCW8;A0A3B3IUD6;A0A1B0GWG0;B7Z5L2;A0A2R8Y6T6;A0A2R8Y4N6;A0A3B3ITC5;B7Z627;A0A2R8Y783;J3QS83;E9PPC9;O60642;Q9UG62;Q4VXN1;Q6ZSX4;A0A2R8Y5C8;E9PN54;Q4VXN0;B4DJ76;B3KT50;B7Z2D7;Q6R5J7;B7Z2G3;B7Z338;B7Z8M8;Q59FD8;…	A0A2R8Y7Y3;Q4VB86;A0A2R8YD30;Q1WWM3;Q59F12;P11171;A0A2U3TZH6;A0A3B3ITP0;Q4VB87;Q29RX4;A0A2R8Y6D0;A0A2R8Y420;A0A2R8Y7N0;A0A2R8YFR9;A0A2R8Y6G5;A0A2R8Y570;A0A2R8Y5G2;A0A2R8Y5Z6;A0A3B3IU06;A0A2R8YCW8;A0A3B3IUD6	Protein 4.1	EPB41			37.8	67.292	0.0129985	0.998935	-0.0031147	-0.0393282	0.212535	0.871468	0.0810407	0.547731	26.3078	26.2878	26.3956	26.187	26.3699	26.425	26.2423	26.3198	26.663
A0A2R8Y7Y4;Q8N8A2;H7C209;Q53T07;C9JY51	A0A2R8Y7Y4;Q8N8A2;H7C209	Serine/threonine-protein phosphatase 6 regulatory ankyrin repeat subunit B	ANKRD44			11.3	114.3	0.831265	0.635771	0.272386	1.79273	0.333114	0.813528	-0.116049	-0.808015	25.0993	24.8842	25.0527	25.5148	25.2983	25.0402	25.2446	25.0976	25.163
A0A2R8Y811;P62263;E5RH77;A4D1M5	A0A2R8Y811;P62263;E5RH77	40S ribosomal protein S14	RPS14			40.7	16.159	0.0806706	0.971596	-0.0363509	-0.228477	0.572117	0.690579	0.137783	1.28598	28.8645	28.6189	28.4576	28.5002	28.8234	28.5083	28.7556	28.7237	28.7659
A0A2R8Y851;P62273;A0A2R8Y6P7;A0A087WTT6	A0A2R8Y851;P62273;A0A2R8Y6P7;A0A087WTT6	40S ribosomal protein S29	RPS29			20.7	10.256	0.800966	0.637743	-1.39497	-1.73294	0.00561366	0.997221	0.0212371	0.0171247	25.1853	25.2557	25.6407	25.4772	22.7973	23.6224	22.0812	24.8603	25.0192
A0A2R8YDI1;A0A2R8Y852;A0A097ZMP4;A0A097ZMP6;A0A2R8Y8D0;B4DMN0;O14529;Q9BZV4	A0A2R8YDI1;A0A2R8Y852;A0A097ZMP4;A0A097ZMP6		CUX1-RETc;CUX1-RETa			11.6	148.57	0.0852965	0.970662	0.0483112	0.240617	0.254895	0.851758	0.0912253	0.641623	25.5095	25.06	24.9675	25.0227	25.4037	25.2555	25.1589	25.3301	25.4666
A0A2R8YF43;A0A2R8YD58;E7EU96;B5BUH5;Q5U5J2;P68400;A0A2R8Y5A0;Q2I0Y7;B2R6D7;Q8NEV1;A0A2R8YDP2;A0A2R8YFU2;A0A2R8Y4D6;A0A2R8Y4H0;V9GYA2;A0A2R8YEW1;A0A2R8YCK2;A0A2R8YDY7;A0A087WY74;A0A2R8Y3W6;A0A2R8Y797;A0A2R8YEL7;V9GY80;A0A2R8YF47;A0A2R8Y7T1;A0A2R8YCC9	A0A2R8YF43;A0A2R8YD58;E7EU96;B5BUH5;Q5U5J2;P68400;A0A2R8Y5A0;Q2I0Y7;B2R6D7;Q8NEV1;A0A2R8YDP2;A0A2R8YFU2;A0A2R8Y4D6;A0A2R8Y4H0;V9GYA2;A0A2R8YEW1	Casein kinase II subunit alpha;Casein kinase II subunit alpha 3	CSNK2A1;CSNK2A3			41	41.79	0.0598178	0.976841	0.0185598	0.172625	1.04888	0.536212	-0.317345	-2.23257	27.8746	27.965	28.1151	28.1245	27.8484	28.0374	27.4842	27.8877	27.6863
H7BXF5;A0A2R8YDB8;Q9H0E3;B3KRT9;Q96DP1;C9J683	H7BXF5;A0A2R8YDB8;Q9H0E3;B3KRT9;Q96DP1	Histone deacetylase complex subunit SAP130	SAP130			9.3	111.28	0.119993	0.949932	0.0110423	0.329102	0.00297731	0.998188	-0.000629425	-0.00910958	27.1941	27.1704	27.2059	27.1388	27.2437	27.221	27.0961	27.1972	27.3083
A0A2U3TZN6;A0A2U3TZM4;B7ZKY2;A0A2U3TZM1;A0A2R8YE77;O14936;A0A2R8Y3B3;Q5JS74;A0A2R8Y6F8;A0A2R8YFN5;A0A2R8YEK3;Q5JS72;Q5JS79;A0A0B6XJY0;A0A2R8YGH2;A0A2R8Y4K4;A0A2R8YEJ7	A0A2U3TZN6;A0A2U3TZM4;B7ZKY2;A0A2U3TZM1;A0A2R8YE77;O14936;A0A2R8Y3B3;Q5JS74;A0A2R8Y6F8;A0A2R8YFN5;A0A2R8YEK3;Q5JS72;Q5JS79	Peripheral plasma membrane protein CASK	CASK			5.2	100.2	0.0064084	0.998096	-0.0163352	-0.0195316	0.807553	0.598947	0.760143	1.74592	22.324	24.3326	24.5825	24.3075	24.0028	22.8797	24.4488	24.4668	24.555
H3BMM5;B2RDH6;A0A2R8YF87;Q96AX1;F5H7N5;F5H6Y0;A0A2R8Y5U3;Q9H6C4	H3BMM5;B2RDH6;A0A2R8YF87;Q96AX1;F5H7N5;F5H6Y0;A0A2R8Y5U3;Q9H6C4	Vacuolar protein sorting-associated protein 33A	VPS33A			6.1	61.238	0.541153	0.764204	-0.0576948	-1.22541	0.638541	0.670406	-0.898846	-1.41547	24.4984	24.4129	24.3539	24.3722	24.3963	24.3236	23.4356	22.381	24.5789
A0A2R8YFL0;P49711;A0A2R8Y595;B3KSE4;A0A2R8Y6Z6;A0A2R8Y6C1;V9GY73;A6XGM9;B2RA05;Q8NI51	A0A2R8YFL0;P49711;A0A2R8Y595	Transcriptional repressor CTCF	CTCF			19.6	82.612	0.0208566	0.996882	-0.0132249	-0.0625699	0.285448	0.839076	-0.149743	-0.70756	26.556	26.5085	26.681	26.3168	26.9748	26.4143	26.322	26.5024	26.4322
A0A2S1ZR87;A0A2S1ZR79;Q96SB8;C9JMN1;A0A0A0MRY1	A0A2S1ZR87;A0A2S1ZR79;Q96SB8;C9JMN1	Structural maintenance of chromosomes protein 6	SMC6			14.1	126.32	0.138976	0.939329	-0.0601966	-0.3758	0.341702	0.811204	-0.759426	-0.825847	24.6387	24.2199	24.2659	24.3811	24.1367	24.426	21.7257	24.4224	24.5175
A0A2U3TZH3;Q05639;Q59GP5;A0A2R8Y488;A0A2R8Y660;A0A2R8YDN5	A0A2U3TZH3;Q05639;Q59GP5	Elongation factor 1-alpha 2	EEF1A2			48.6	54.34	0.303132	0.881182	0.095555	0.745144	0.0570688	0.964701	0.0156574	0.165115	27.0357	26.7397	26.8415	27.0104	27.1058	26.7873	26.9653	26.9892	26.9959
A0A2X0SF55;Q12802;B7ZW05;A0A087WTD7;A8MYJ1;A0A087WY36;A0A087WX73;H0YMW2	A0A2X0SF55;Q12802;B7ZW05;A0A087WTD7;A8MYJ1	A-kinase anchor protein 13	AKAP13			3.4	307.77	0.110147	0.953052	-0.0599734	-0.304425	0.326542	0.817908	-0.359708	-0.794319	23.901	24.0757	23.6444	23.642	24.117	23.6823	22.6016	23.8497	23.9108
B4E2K6;E9PMR6;A0A2X0SFF5;Q9NZN5;B4DGW2	B4E2K6;E9PMR6;A0A2X0SFF5;Q9NZN5;B4DGW2	Rho guanine nucleotide exchange factor 12	ARHGEF12			4.7	143.95	0.0816764	0.970902	0.0448799	0.231124	0.0437556	0.972826	-0.0241191	-0.128226	22.6895	22.5045	22.6695	22.5074	23.0351	22.4556	22.583	22.6443	22.6984
D3DS14;A0A2X0SFG4;Q8TER5;D3DS15	D3DS14;A0A2X0SFG4;Q8TER5;D3DS15	Rho guanine nucleotide exchange factor 40	FLJ10357;ARHGEF40			7.8	164.64	0.0261044	0.99551	-0.010582	-0.0778805	0.0930376	0.944051	0.05697	0.260741	24.7984	24.7854	24.5721	24.7176	24.5053	24.9012	24.4916	24.6829	25.1206
A0A2X0SFJ0;O75962;E7EPJ7;E7EWP2;D3DTD2;A0A1W2PRD7;Q7Z2K2;A0A087X139	A0A2X0SFJ0;O75962;E7EPJ7;E7EWP2;D3DTD2	Triple functional domain protein	TRIO			4.9	341.82	0.222548	0.90866	-0.0296281	-0.570212	0.993931	0.55436	-0.318639	-2.11943	24.7857	24.8862	24.7611	24.8475	24.7276	24.7689	24.1718	24.6334	24.5829
A0A2X0SFV3;Q9NRY4;A2RRE5;B4DPI8	A0A2X0SFV3;Q9NRY4	Rho GTPase-activating protein 35	ARHGAP35			10.2	170.74	0.810592	0.64217	-0.128703	-1.75191	0.619935	0.683698	0.17792	1.37923	25.7397	25.7017	25.8379	25.7477	25.5404	25.605	25.7848	25.6255	26.0166
A0A2X0SFY7;P15882;F8W6K2;A0A494C1R0;B8ZZ96;C9J3V9;C9JR98;Q59EM3;Q6IBE0;A0A494C0C9;A0A494C1M7;C9J3G1;A0A494C047;A0A494C1D3;A0A494C0V1;A0A494C1H3;A0A494C072	A0A2X0SFY7;P15882;F8W6K2;A0A494C1R0;B8ZZ96;C9J3V9;C9JR98;Q59EM3;Q6IBE0;A0A494C0C9;A0A494C1M7;C9J3G1	N-chimaerin	CHN1			20	53.398	0.619332	0.721722	0.138168	1.37806	0.175686	0.896243	0.0720215	0.463219	24.9275	24.6494	24.651	24.8842	24.9463	24.8119	25.2416	24.8824	24.7345
Q53SF8;G5E9C8;A0A3G1LBG1;A0A2X0SG47;Q07889;Q8NIA3;Q59GG9;Q59G32;D3DSB1;B7ZKT5;A0A2X0TW17;Q07890;C9K0N6;B4DZB0;A0A087X277	Q53SF8;G5E9C8;A0A3G1LBG1;A0A2X0SG47;Q07889;Q8NIA3;Q59GG9	Son of sevenless homolog 1	SOS1			6.8	149.06	0.052669	0.981893	-0.00960732	-0.153021	1.13679	0.51816	0.254911	2.41724	24.1944	24.1917	24.1473	24.2896	24.099	24.116	24.3533	24.3218	24.5943
A0A2X0TVY0;Q9Y4F1;C9JME2;A0A1B0GV68;M0QYB0;M0QXT1;H0Y783	A0A2X0TVY0;Q9Y4F1;C9JME2	FERM, RhoGEF and pleckstrin domain-containing protein 1	FARP1			13.8	118.63	0.509555	0.783815	0.110285	1.16337	0.878172	0.586552	0.183276	1.88586	26.0843	25.8991	25.8833	26.1328	26.1378	25.927	26.2254	26.1451	26.377
Q504W7;A0A2X0TVZ9;Q01968;A0A2R8YG38;A0A2R8YCN4	Q504W7;A0A2X0TVZ9;Q01968	Inositol polyphosphate 5-phosphatase OCRL-1	OCRL			12	103.18	0.0666679	0.973122	0.0147298	0.191184	0.356936	0.804402	0.0816422	0.8573	25.897	25.6727	25.8086	25.751	25.7842	25.8872	25.8997	25.7352	26.0324
A0A2Z6ATB6;Q16643;D6R9W4;B3KSQ7;B7Z2Z0;D6RFI1;D6R9Q9;D6RCR4	A0A2Z6ATB6;Q16643;D6R9W4;B3KSQ7	Drebrin	DBN1			33.1	76.309	0.570212	0.754457	0.167807	1.28226	0.227131	0.863367	0.0747757	0.580441	28.6175	28.4179	28.6089	28.4898	28.812	28.846	28.6912	28.7796	28.9014
A0A384DVU0;Q8IY17;B4DEV3;M0QYF5;M0QZK5;M0R2H4;M0R2K2;A0A2R8Y7E1	A0A384DVU0;Q8IY17	Neuropathy target esterase	PNPLA6			5.9	149.92	0.12589	0.945687	-0.078104	-0.343728	1.288	0.491701	-0.479767	-2.74719	24.1389	24.8065	24.7885	24.3844	24.5417	24.5734	23.6929	24.215	24.1524
A0A384MDL3;Q15370;B8ZZU8;A0A0B4J296;I3L0M9	A0A384MDL3;Q15370;B8ZZU8;A0A0B4J296;I3L0M9	Transcription elongation factor B polypeptide 2	TCEB2			43.5	17.911	1.20928	0.534714	0.532275	2.57332	0.616634	0.684761	0.288451	1.3728	26.4101	26.391	26.3915	26.6565	27.3352	26.7977	27.145	27.241	27.2687
A0A384MDR6;Q13724;Q58F09;C9J8D4;A0A3B3IRK6;A0A3B3IS52;A8K9K4;A0A3B3IRW2;A0A3B3ITC1;C9JDQ1;A0A3B3ITU6;B8ZZE2;A0A3B3IRI7;A0A3B3IRI1;B4E3B8	A0A384MDR6;Q13724;Q58F09;C9J8D4;A0A3B3IRK6;A0A3B3IS52;A8K9K4;A0A3B3IRW2	Mannosyl-oligosaccharide glucosidase	MOGS;GCS1			28.9	91.916	0.0050867	0.999432	-0.00228437	-0.0155264	0.179775	0.893341	-0.0564995	-0.472745	27.6937	28.0327	28.0776	28.0708	27.7824	27.9437	28.0253	27.7289	27.8733
A0A384MDR8;P11177;C9J634;F8WF02;Q59G68	A0A384MDR8;P11177;C9J634;F8WF02	Pyruvate dehydrogenase E1 component subunit beta, mitochondrial	PDHB			36.2	39.233	0.00275803	1	-0.000846227	-0.00844077	0.149115	0.912644	0.0600478	0.400306	26.3766	26.3037	26.4275	26.1836	26.4349	26.4867	26.6486	26.2485	26.3883
B4DY59;E9PF19;Q8N2L6;B2RB52;A0A384MDS4;Q9Y4P3;B4DY50;A0A0S2Z5F3;Q96E41;A0A0S2Z5C1;A0A087WXC6	B4DY59;E9PF19;Q8N2L6;B2RB52;A0A384MDS4;Q9Y4P3;B4DY50;A0A0S2Z5F3;Q96E41	Transducin beta-like protein 2	TBL2			37.1	35.379	1.09752	0.526582	-0.161537	-2.33415	0.169062	0.901197	0.038009	0.447701	26.2965	26.493	26.2776	26.1828	26.193	26.2068	26.0633	26.3254	26.3079
A0A384MDT2;P55795;B4DFK9;B4DP00	A0A384MDT2;P55795;B4DFK9;B4DP00	Heterogeneous nuclear ribonucleoprotein H2	HNRNPH2			39.2	49.263	0.549861	0.757136	0.338275	1.24246	0.0493757	0.968912	-0.0239487	-0.143907	26.2975	25.9373	25.4622	26.4849	26.0839	26.143	26.365	26.2752	25.9998
A0A384MDU9;V9HW58;Q53H88;Q13561;A8K8J9;B3KTX4;H0YI98;F8W1I6;F8VW18;H0YHL1;F8VX93;F8VRV7	A0A384MDU9;V9HW58;Q53H88;Q13561;A8K8J9;B3KTX4;H0YI98;F8W1I6	Dynactin subunit 2	HEL-S-77;DCTN2			34.4	44.23	0.5295	0.771848	0.0828355	1.20257	0.596472	0.683913	0.130739	1.3335	25.8817	25.7245	25.6643	25.8296	25.8842	25.8052	25.7955	25.9926	26.1231
A0A384MDW3;P51812;B4DKZ2;B4DG22;B1AXG1;B7ZB17;A0A2R8Y603;B7Z3B5;F2Z2J1;Q15349;Q8TDJ4;Q7Z2J3;Q7Z2J4;B1AXG2;A0A2R8YGB7;D6RHW7;E9PMM7;D6R910;A0A2R8Y7S9;Q5SVM6;E9PAN7;B3KU51;B4DMN4;V9GXZ1;E7ERL6;A0JLR0;B4DS23;B4DSE5;B4DKT8;O60307;Q9Y2H9;Q6P0Q8;O15021	A0A384MDW3;P51812;B4DKZ2;B4DG22;B1AXG1;B7ZB17	Ribosomal protein S6 kinase alpha-3	RPS6KA3			18.2	83.735	1.31301	0.508824	0.100099	2.80347	0.536388	0.706064	-0.07105	-1.21607	26.2464	26.2291	26.245	26.4062	26.2856	26.329	26.2794	26.3443	26.1839
Q12915;A0A384MDW6;Q96C23;B8ZZ75;H7C320;H7C1B5	Q12915;A0A384MDW6;Q96C23;B8ZZ75	Aldose 1-epimerase	Ibd1;GALM			18.6	22.095	0.337689	0.861691	-0.600733	-0.817523	0.101044	0.938944	0.222101	0.281315	23.8583	24.1765	23.9257	24.1211	21.9293	24.108	23.0052	23.8359	23.9836
A0A384MDW7;P30084	A0A384MDW7;P30084	Enoyl-CoA hydratase, mitochondrial	ECHS1			48.3	31.399	0.0319008	0.993038	-0.0142638	-0.0946046	0.116028	0.932091	0.0417703	0.319204	28.1729	27.8746	27.9092	27.7387	28.0557	28.1194	27.9154	28.0105	28.1133
A0A384MDY0;P35221;B4E2G8;B4DKT9;B4DU00;G3XAM7;B3KSR8;E5RIB1;E5RJ41;E5RG03;E5RJP7;E5RGD2;E5RGY6;E5RFM5;E5RHV7;E5RGY7;E5RFG3;E5RJL0;E5RFK9;E5RIE0;A0A087WZL6;E5RGU3;E5RHJ5;E5RFM3;H0YBB8;E5RJZ2;E5RGG4;E5RJ43;E5RGS1;E5RIT8;A8K141;Q9UI47	A0A384MDY0;P35221;B4E2G8;B4DKT9;B4DU00;G3XAM7;B3KSR8	Catenin alpha-1	CTNNA1			61	100.07	0.751884	0.661452	0.133772	1.63658	0.791512	0.60267	0.115491	1.71434	28.5291	28.3172	28.5333	28.5846	28.5295	28.6668	28.7686	28.6007	28.758
Q53HG7;A0A384MDY8;Q14247;A0A024R5M3;Q76MU0;B4E358;B3KRK4;H0YCD9;H0YEV2;A0A0B6XJY7	Q53HG7;A0A384MDY8;Q14247;A0A024R5M3;Q76MU0	Src substrate cortactin	CTTN;EMS1			44	61.557	0.960465	0.583992	0.170495	2.05128	0.110264	0.934566	-0.0265547	-0.30472	28.3126	28.1168	28.2375	28.2772	28.4812	28.42	28.3817	28.2506	28.4663
A8K1E1;A0A384MDZ1;P20585	A8K1E1;A0A384MDZ1;P20585	DNA mismatch repair protein Msh3	MSH3			14.5	126.76	0.0284085	0.995679	0.0117664	0.0845517	0.135796	0.922844	0.0396589	0.368053	25.4701	25.6594	25.3189	25.5595	25.3014	25.6228	25.5041	25.4774	25.6212
A0A384MDZ8	A0A384MDZ8					49.3	55.366	0.833847	0.637032	-0.241166	-1.79784	2.01316	0.380702	0.555908	4.64448	27.5883	27.9671	27.8277	27.5876	27.664	27.408	27.9528	28.1014	28.2732
A0A384ME16;Q6ICN0;B3KR50;B0LPF3;P62993;J3KT38;J3QRL5	A0A384ME16;Q6ICN0;B3KR50;B0LPF3;P62993;J3KT38;J3QRL5	Growth factor receptor-bound protein 2	GRB2			19.1	24.946	0.156792	0.935944	-0.0345364	-0.418671	0.757232	0.608362	-0.965654	-1.64706	23.7229	23.7068	23.7816	23.7952	23.5447	23.7677	22.078	23.895	22.2376
A0A384ME17;P49411;H3BNU3	A0A384ME17;P49411	Elongation factor Tu, mitochondrial	TUFM			63.5	49.874	0.81215	0.644287	-0.088206	-1.75498	0.934228	0.576612	-0.114343	-1.99823	30.1576	30.1938	30.1887	30.0871	30.0095	30.1789	30.0339	29.9647	29.9338
A0A384ME37;P40429;Q5QTS3;Q9BSQ6;Q53H34;M0QYS1;Q8J015;B4DNC8;Q0VGL3;Q6NVV1;M0QZU1;A0A096LPE0	A0A384ME37;P40429;Q5QTS3;Q9BSQ6;Q53H34;M0QYS1;Q8J015;B4DNC8;Q0VGL3	60S ribosomal protein L13a	RPL13A;RPL13a			51.7	23.577	0.910791	0.608746	-0.337091	-1.95109	0.0810795	0.95332	0.124201	0.229554	29.9252	30.3446	30.135	30.0001	29.5746	29.8188	28.9006	30.2089	30.6567
E5RHW4;A0A384ME54;O94905;E5RJ09	E5RHW4;A0A384ME54;O94905;E5RJ09	Erlin-2	ERLIN2			29	37.725	0.269134	0.897956	-0.0473169	-0.672519	0.237746	0.856565	0.0616474	0.603986	26.7774	26.7339	26.6561	26.564	26.7732	26.6883	26.6085	26.7124	26.8895
A0A384ME80;B4DUC8;Q13126;A0A140CZL4;Q6FHT1;Q6FHP1;A0A140CZL6;A0A140CZL5;Q05DJ2;J3QSB7;F2Z2F3;Q8WV80;F8WES2;Q9NRK7;J3KRN1	A0A384ME80;B4DUC8;Q13126;A0A140CZL4;Q6FHT1;Q6FHP1;A0A140CZL6;A0A140CZL5;Q05DJ2;J3QSB7	S-methyl-5-thioadenosine phosphorylase;Purine nucleoside phosphorylase	MTAP			42.8	31.236	0.582749	0.750906	0.183606	1.30673	1.7966	0.408473	0.450378	4.01174	25.5637	25.2386	25.3368	25.4448	25.7671	25.4781	26.0449	25.9229	26.0733
A8K6K2;A0A384MED8;P49902;B3KXN5;Q5JUV4;S4R3E7;S4R3A6;Q5JUV6	A8K6K2;A0A384MED8;P49902;B3KXN5;Q5JUV4	Cytosolic purine 5-nucleotidase	NT5C2			19.1	64.959	0.528817	0.771728	0.0706863	1.20122	0.414534	0.785224	-0.0934766	-0.974464	25.7818	25.9167	25.9027	25.9502	25.8625	26.0006	25.6763	25.8887	25.9678
A0A384MEE7;Q9BS26	A0A384MEE7;Q9BS26	Endoplasmic reticulum resident protein 44	ERP44			31	46.971	0.0907654	0.969874	0.0208721	0.254858	1.405	0.477503	0.251179	3.01503	27.0295	27.228	27.1832	27.0652	27.2563	27.1819	27.3172	27.5313	27.4084
A0A384MEG1;Q16658;B3KTA3;B3KTM9;C9JFC0;A0A0A0MSB2;C9JPH9	A0A384MEG1;Q16658;B3KTA3	Fascin	FSCN1			72.6	54.529	0.234664	0.905204	0.0318305	0.59717	0.978812	0.557979	0.0516707	2.08857	30.9539	30.7921	30.8469	30.85	30.9066	30.9318	30.9515	30.9544	30.9375
A0A384MEJ3;G8JLB6;P31943;E9PCY7;D6RBM0;E5RGV0;D6RIT2;D6RIU0;H0YB39;D6RAM1;D6R9T0;D6RFM3;D6RDU3;D6RJ04;D6RIH9;Q68DG4;H0YBD7;E7EQJ0;E7EN40;D6RDL0;E5RGH4;H0YBG7;D6R9D3;D6RF17;H0YAQ2;B4DP51;E5RJ94	A0A384MEJ3;G8JLB6;P31943;E9PCY7;D6RBM0;E5RGV0;D6RIT2;D6RIU0;H0YB39	Heterogeneous nuclear ribonucleoprotein H;Heterogeneous nuclear ribonucleoprotein H, N-terminally processed	HNRNPH1			53.2	49.229	0.132646	0.942827	0.0453612	0.360351	1.46376	0.478901	-0.338858	-3.1542	30.4677	30.5169	30.7286	30.5609	30.4829	30.8055	30.2372	30.369	30.2265
A0A384MQX1;P02545;W8QEH3;Q5I6Y5;Q3BDU5;Q8N519;Q5TCI8;H0YAB0;B4DFR3;W5X314;A0A0C4DGC5	A0A384MQX1;P02545;W8QEH3;Q5I6Y5;Q3BDU5;Q8N519;Q5TCI8	Prelamin-A/C;Lamin-A/C	LMNA			61.4	74.139	0.0720665	0.973071	0.018568	0.205662	0.866748	0.590249	-0.198165	-1.86311	30.87	30.6557	30.763	30.6936	30.7406	30.9101	30.4527	30.5582	30.739
A0A384MQX5;Q9UBV8	A0A384MQX5;Q9UBV8	Peflin	PEF1			8.1	30.381	1.47725	0.4756	0.214898	3.18662	0.400018	0.791912	-0.0948099	-0.94517	23.6937	23.6004	23.6736	23.846	23.9869	23.7794	23.9287	23.7379	23.6613
A0A384MR19;F8VXU5;Q9UBQ0;Q5JPE4;E9RKB4;Q05DG7	A0A384MR19;F8VXU5;Q9UBQ0;Q5JPE4	Vacuolar protein sorting-associated protein 29	VPS29;DKFZp667O202			32.3	20.927	0.0412732	0.990343	0.0162455	0.121249	0.0952553	0.943191	0.0445207	0.266464	26.553	26.8504	26.7001	26.8322	26.5122	26.808	26.681	26.5855	27.0195
A0A384MR27;P09382;F8WEI7;A0A0B6XK00	A0A384MR27;P09382	Galectin-1	LGALS1			74.8	14.716	0.219955	0.906468	-0.0459607	-0.564409	0.741128	0.616558	0.21316	1.61554	30.4911	30.2143	30.3312	30.273	30.3058	30.3199	30.335	30.4344	30.7688
A0A384MR33;Q14683;G8JLG1;Q6P2R1;A8K7A6;Q6MZR8;B7Z709;Q68EN4;H0Y7K8;V9GY57;Q5H934;Q7Z4C6;V9GYN9	A0A384MR33;Q14683;G8JLG1;Q6P2R1;A8K7A6;Q6MZR8	Structural maintenance of chromosomes protein 1A;Structural maintenance of chromosomes protein	SMC1A;DKFZp686L19178			56.9	143.23	2.57891	0.302957	-0.117835	-6.66226	0.021457	0.989594	0.00449053	0.06433	30.3321	30.3487	30.317	30.2437	30.1925	30.2082	30.0994	30.2231	30.3353
A0A384MR44;Q13011;M0R248;M0QZW4;B4DVS4	A0A384MR44;Q13011;M0R248	Delta(3,5)-Delta(2,4)-dienoyl-CoA isomerase, mitochondrial	ECH1			34.8	35.816	0.511321	0.782587	0.152348	1.16685	0.00887844	0.994513	-0.00309054	-0.0269852	26.5338	26.1802	26.5959	26.5645	26.5809	26.6216	26.7827	26.5846	26.3903
B2R7T8;A0A384MR50;B1AK87;B1AK88;B4DWA6;P47756;B1AK85;Q7L4N0	B2R7T8;A0A384MR50;B1AK87;B1AK88;B4DWA6;P47756;B1AK85	F-actin-capping protein subunit beta	CAPZB			53.7	30.656	0.448771	0.807291	0.151147	1.04304	1.75801	0.402136	-0.301472	-3.90567	27.9207	28.2786	28.3106	28.4435	28.1899	28.3298	27.9902	28.0673	28.0014
I3L0N3;B7Z5J7;A0A384MTI6;P46459;B7Z9U2;B4DH19;B4DGR3;B4DSK5;Q96D47;D3DXJ4;I3L2G1;I3L0L3;K7EQD6;I3L338;Q9H3V6;I3L4Q9	I3L0N3;B7Z5J7;A0A384MTI6;P46459;B7Z9U2;B4DH19;B4DGR3;B4DSK5	Vesicle-fusing ATPase	NSF			34.2	82.091	0.62861	0.719682	-0.137373	-1.39613	0.553514	0.69882	0.120894	1.24961	28.2597	28.0762	28.1278	28.0336	27.8679	28.15	28.1573	28.0406	28.2162
Q53G42;A0A384MTI8;Q96C86;A0A3B3ITF0	Q53G42;A0A384MTI8;Q96C86	m7GpppX diphosphatase	DCPS			22	38.609	0.0600868	0.977503	0.0271613	0.173358	0.324001	0.819935	-0.088136	-0.78901	26.184	26.0841	26.5422	26.3211	26.1621	26.4086	26.0623	26.2074	26.3577
A0A384MTJ7;B4DLJ0;A0A0U1RQK9;H0YMG7;B4DH89;O94788;Q9UED3;H0YKL3	A0A384MTJ7;B4DLJ0					43.5	57.249	3.39259	0.32	2.62631	10.881	2.10551	0.375149	-1.20492	-4.93527	25.9181	25.697	26.14	28.4686	28.9311	28.2343	27.5486	27.3781	27.0925
A0A384MTL2;P37802;X6RJP6;B7Z5A2	A0A384MTL2;P37802;X6RJP6	Transgelin-2	TAGLN2			79.4	22.391	1.12128	0.525042	0.187813	2.3843	0.217759	0.867889	0.0448303	0.559483	29.4405	29.3501	29.3528	29.5735	29.693	29.4403	29.5849	29.5766	29.6798
A0A384MTQ3;P23526;Q1RMG2	A0A384MTQ3;P23526;Q1RMG2	Adenosylhomocysteinase	AHCY			41	47.716	0.0537329	0.981296	-0.015276	-0.155954	0.134994	0.923206	0.0304934	0.366096	30.4833	30.3693	30.2471	30.402	30.2123	30.4395	30.3114	30.3693	30.4646
A0A384MTQ5;P48449;B2R694;A0A0G2JQD0;C9J315;A0A0G2JS81;H7C3A5	A0A384MTQ5;P48449;B2R694;A0A0G2JQD0	Lanosterol synthase;Terpene cyclase/mutase family member	LSS			29.8	83.294	0.00807073	0.998655	0.00321579	0.0245523	0.696303	0.642993	0.0790825	1.52801	27.4812	27.9239	27.7516	27.7686	27.6917	27.7061	27.7146	27.8172	27.8718
A0A384MTR2;P30048;Q53HC2;A4UCS5	A0A384MTR2;P30048;Q53HC2	Thioredoxin-dependent peroxide reductase, mitochondrial	PRDX3			39.1	27.692	0.748067	0.661727	0.210952	1.62911	0.921474	0.57839	0.279732	1.97255	26.7045	26.7421	26.6428	26.6867	27.1239	26.9117	27.2729	27.0604	27.2281
B5BUB1;A0A384MTR5;Q9Y265;E7ETR0;B3KRS7;H7C4G5;J3QLR1;H7C4I3	B5BUB1;A0A384MTR5;Q9Y265;E7ETR0;B3KRS7	RuvB-like 1	RUVBL1			62.1	50.215	1.39572	0.498412	0.0928141	2.99334	0.108026	0.935049	0.00556056	0.299066	29.2335	29.1731	29.1292	29.2695	29.2604	29.2843	29.2879	29.2998	29.2432
A0A384MTS1;Q96BP3;F5H7P7;B4DT22;D6RD43;D6R9Q1;B4DP34;D6RA12;D6RDA4;D6RB19;D6RHV0	A0A384MTS1;Q96BP3;F5H7P7;B4DT22	Peptidylprolyl isomerase domain and WD repeat-containing protein 1	PPWD1			10.8	73.574	0.372404	0.844386	0.258821	0.889023	0.134517	0.922668	0.12964	0.364931	23.2243	23.8765	23.577	23.416	24.1817	23.8567	24.5017	23.6436	23.698
A0A384MTW7;P15531	A0A384MTW7;P15531	Nucleoside diphosphate kinase A	NME1			71.7	17.149	0.27182	0.897466	-0.0834503	-0.678315	0.223747	0.865641	0.205687	0.572891	26.573	26.5921	26.8566	26.6296	26.4326	26.7091	26.0984	27.1817	27.1083
A0A384NPX8;A0A384MTZ1;P47985;P0C7P4	A0A384NPX8;A0A384MTZ1;P47985;P0C7P4	Cytochrome b-c1 complex subunit Rieske, mitochondrial;Cytochrome b-c1 complex subunit 11;Putative cytochrome b-c1 complex subunit Rieske-like protein 1	UQCRFS1;UQCRFS1P1			23	29.692	0.224127	0.908082	0.0497932	0.573741	0.284245	0.840092	-0.0396112	-0.704989	24.0141	23.8579	24.1437	24.0735	24.0028	24.0888	24.036	23.9212	24.0891
A0A384N5Z8;P23246;Q9BSV4;Q86VG2;Q6PIX2;H0Y9K7;H0Y9U2	A0A384N5Z8;P23246;Q9BSV4;Q86VG2;Q6PIX2	Splicing factor, proline- and glutamine-rich	SFPQ			46.7	76.149	1.33197	0.51821	-0.124793	-2.84648	0.367246	0.805614	0.0126686	0.878466	31.4929	31.4664	31.3563	31.3383	31.3095	31.2935	31.3146	31.3301	31.3345
A0A384N605;Q5M7Z5;U3KQ56;Q9UBQ7	A0A384N605;Q5M7Z5;U3KQ56;Q9UBQ7	Glyoxylate reductase/hydroxypyruvate reductase	GRHPR			15.9	35.668	0.90544	0.610542	0.300999	1.94036	1.27097	0.498388	-0.242361	-2.70917	23.7364	23.9774	24.1859	24.1321	24.2469	24.4238	23.972	24.0689	24.0348
A0A384N6B9;Q15366;F8W0G4;F8VXH9;F8W1G6;J3QT27;H3BND9;H3BSS4;F8VTZ0;H3BSP4;C9K0A2;F8WC71;C9IZV9;C9J7A9;C9JSA6;C9J5V4;C9JTY5;C9JZY3;C9J0A4;Q7Z4Y9;A0A024R320;P57723	A0A384N6B9;Q15366;F8W0G4;F8VXH9	Poly(rC)-binding protein 2	PCBP2			55.2	38.651	0.631306	0.717475	-0.161927	-1.40138	0.0267726	0.988879	0.00813802	0.0798184	28.6863	28.7823	28.9412	28.5068	28.609	28.8082	28.5575	28.7322	28.6588
A0A384N6C2;P12268;H0Y4R1;B7Z1G4;Q6QE17;E7ETK5;Q6RUP8;Q6RUP9	A0A384N6C2;P12268;H0Y4R1;B7Z1G4	Inosine-5-monophosphate dehydrogenase 2	IMPDH2			46.5	55.804	1.93045	0.381333	0.283946	4.39499	0.883044	0.582316	0.0945962	1.89558	28.7515	28.6179	28.6389	28.8589	29.0265	28.9748	29.0592	29.0383	29.0464
H7C3G9;A0A384N6G7;Q9UJ70;E9PPU6;H0YEB7;H7C286;C9JEV6;H0YC94;H7C1L7	H7C3G9;A0A384N6G7;Q9UJ70;E9PPU6;H0YEB7;H7C286;C9JEV6	N-acetyl-D-glucosamine kinase	NAGK			15.3	36.888	0.127209	0.945652	0.0494156	0.346983	0.54432	0.705886	0.174426	1.23162	24.1076	24.0018	24.361	24.0191	24.3226	24.2768	24.2028	24.3712	24.5679
A0A384N6H1;P13639;Q8TA90;B4DPU3;Q6PK56;B4DRE8;B4DMC6;Q6W6M8;M0R0I6	A0A384N6H1;P13639;Q8TA90;B4DPU3;Q6PK56	Elongation factor 2	EEF2			70.2	95.337	0.0541845	0.981977	0.0109622	0.157198	0.393391	0.794965	0.0977389	0.931747	33.1204	32.9486	32.8895	32.9821	33.0096	32.9997	32.9039	33.1164	33.2643
Q96DC0;A0A384NKJ3;P42126;H3BS70	Q96DC0;A0A384NKJ3;P42126;H3BS70	Enoyl-CoA delta isomerase 1, mitochondrial	DCI;ECI1			16	26.982	0.68973	0.684991	0.147664	1.51519	0.11551	0.931746	0.0304782	0.317906	25.717	25.9575	25.7637	25.9185	26.0858	25.8769	25.8854	25.9599	26.1273
A0A384NKW7;P55060;B4DM31;B4DUC5;B4DPS6;B4DS32;B4DM67	A0A384NKW7;P55060;B4DM31;B4DUC5;B4DPS6	Exportin-2	CSE1L			41.6	110.42	0.00516935	0.999479	-0.0012366	-0.0157772	0.916173	0.580015	0.0946935	1.9619	30.1573	30.3715	30.383	30.2477	30.3313	30.329	30.406	30.3247	30.4614
Q53FC7;B3KSM6;B2R6X5;A0A384NKX5;P17066;B4DHP5;P48741	Q53FC7;B3KSM6;B2R6X5;A0A384NKX5;P17066;B4DHP5;P48741	Heat shock 70 kDa protein 6;Putative heat shock 70 kDa protein 7	HSPA6;HSPA7			15.7	71.003	0.284985	0.891019	2.15369	0.70657	0.569152	0.691006	2.59611	1.28018	29.0236	22.7165	21.7696	22.6273	29.0521	28.2913	29.1848	29.3906	29.1836
A8K8D9;A0A384NL00;P11413;Q2VF42;Q2Q9H2;Q2Q9B7;B4DYA7;A0A4P8W0G4;E7EUI8;E9PD92;Q0PHS1;E7EM57;A0A2H4QGB6;A0A2H4QGB2;A2IBT6;Q0PHS4;A7IZZ3;Q0PHS5;A0A2H4QGB8;I3V9R4;Q0PHS3;Q0PHS2;B6ZHS6;Q0PHS6	A8K8D9;A0A384NL00;P11413;Q2VF42;Q2Q9H2;Q2Q9B7;B4DYA7;A0A4P8W0G4;E7EUI8;E9PD92;Q0PHS1;E7EM57	Glucose-6-phosphate 1-dehydrogenase	G6PD			54.2	59.314	1.03524	0.550296	0.101274	2.20434	1.08537	0.531173	-0.0884825	-2.30865	28.7756	28.8465	28.7328	28.9066	28.9282	28.8238	28.7572	28.8297	28.8062
A0A384NL22;P49720;A0A087WXQ8;A0A087WY10;A0A087WUL2	A0A384NL22;P49720;A0A087WXQ8;A0A087WY10;A0A087WUL2	Proteasome subunit beta type-3	PSMB3			40.5	22.949	0.264905	0.900385	0.0647176	0.663375	0.240554	0.856334	-0.0697753	-0.610181	25.81	25.7832	25.8685	26.0504	25.7239	25.8816	25.9292	25.705	25.8124
A0A384NL38;Q14376;Q5QPP1;Q5QPP3;Q5QPP4;A0A024RAB7;Q5QPP9	A0A384NL38;Q14376;Q5QPP1;Q5QPP3;Q5QPP4;A0A024RAB7	UDP-glucose 4-epimerase	GALE			15.5	38.281	0.764573	0.652932	-0.0868409	-1.66145	0.479465	0.746092	-0.257264	-1.10399	24.5915	24.4465	24.5982	24.4341	24.4507	24.4909	23.7499	24.3307	24.5232
B3KM97;A0A384NL45;Q9NZ01;B3KSQ1;M0R2N5;M0R3C3;M0R329;B4DR74	B3KM97;A0A384NL45;Q9NZ01;B3KSQ1;M0R2N5	Very-long-chain enoyl-CoA reductase	TECR			26.3	36.053	0.287601	0.891905	-0.131952	-0.712158	0.512768	0.722346	-0.243813	-1.1697	27.9104	28.3932	28.4687	28.171	28.0042	28.2013	27.4974	27.9826	28.165
A0A384NL53;P16152;E9PQ63;A8MTM1	A0A384NL53;P16152;E9PQ63;A8MTM1	Carbonyl reductase [NADPH] 1	CBR1			53.1	30.375	0.25399	0.902058	0.0665099	0.639647	0.375305	0.803782	-0.058087	-0.894949	26.8238	26.5504	26.7856	26.6737	26.8115	26.8741	26.7708	26.6792	26.7351
A0A384NL63;P51991;Q65ZQ3;B4E036;Q8NFG3;H7C1J8;Q66K53	A0A384NL63;P51991;Q65ZQ3	Heterogeneous nuclear ribonucleoprotein A3	HNRNPA3;D10S102			40.5	39.594	0.433674	0.809539	-0.0590331	-1.01288	1.10731	0.532185	-0.14329	-2.35478	29.6096	29.7379	29.7016	29.7041	29.5524	29.6155	29.4142	29.4695	29.5585
A0A384NL93;P10606;Q6FHM4;Q6FHJ9	A0A384NL93;P10606;Q6FHM4;Q6FHJ9	Cytochrome c oxidase subunit 5B, mitochondrial	COX5B			34.9	13.696	0.184291	0.920076	0.0563787	0.483222	0.293009	0.835645	0.102123	0.723678	27.8852	28.2321	27.9635	27.989	28.098	28.163	27.9585	28.1832	28.4146
A0A384NPH0;Q03252;A0A0A7M1X5	A0A384NPH0;Q03252;A0A0A7M1X5	Lamin-B2	LMNB2			36.7	67.688	1.30198	0.505172	0.272935	2.77858	0.332486	0.814018	-0.0560513	-0.806709	27.0016	26.8709	26.6877	27.0612	27.1887	27.1292	27.0217	27.0016	27.1875
Q69YR0;A0A384NPL4;Q8NBP0;Q9H659;H0YB10;E5RHB3;E5RG15	Q69YR0;A0A384NPL4;Q8NBP0;Q9H659	Tetratricopeptide repeat protein 13	DKFZp667K0918;TTC13			11.7	89.249	1.05017	0.543798	-0.365358	-2.23525	0.225084	0.864071	0.0874125	0.575877	24.5395	24.8674	24.4432	24.4259	24.0755	24.2526	24.3283	24.1481	24.5397
A0A384NPM7;Q8NBX0	A0A384NPM7;Q8NBX0	Saccharopine dehydrogenase-like oxidoreductase	SCCPDH			26.1	47.151	0.219197	0.907352	-0.0607045	-0.56271	0.00379593	0.998062	-0.00347519	-0.0116035	26.6362	26.5191	26.6067	26.3573	26.5128	26.7098	25.9738	26.6903	26.9053
Q53FB6;A0A384NPN7;P05091;B4YAH7;S4R3S4;F8VP50;Q59EJ0;B4DXX3;B4DDF8;V9HW83;V9HVX6;P00352;Q9UN17;Q5SYQ7;Q5SYQ9;Q5SYQ8	Q53FB6;A0A384NPN7;P05091;B4YAH7	Aldehyde dehydrogenase, mitochondrial	ALDH2			50.5	56.367	2.40716	0.292588	0.603768	5.98598	1.70302	0.413684	0.269541	3.7577	28.2599	28.4455	28.5756	28.9487	29.089	29.0545	29.3499	29.3663	29.1847
A0A384NPQ2;Q06830;A0A0A0MSI0;B2R4P2;A0A0A0MRQ5	A0A384NPQ2;Q06830;A0A0A0MSI0;B2R4P2	Peroxiredoxin-1	PRDX1			73.4	22.11	2.22322	0.339217	0.458325	5.32607	0.598814	0.684681	0.145467	1.33807	30.6802	30.5478	30.6453	31.2336	31.0283	30.9864	31.0735	31.3055	31.3056
A0A384NPU2;P49773;D6REP8;D6RE99;D6RD60;D6RC06;A4D2H4	A0A384NPU2;P49773;D6REP8;D6RE99;D6RD60	Histidine triad nucleotide-binding protein 1	HINT1			39.7	13.802	0.27192	0.897823	0.0524133	0.67853	0.389209	0.794838	-1.86028	-0.923261	27.3355	27.2582	27.2443	27.2998	27.2264	27.469	21.4847	26.9713	27.9584
A0A384NPU5;Q15084	A0A384NPU5;Q15084	Protein disulfide-isomerase A6	PDIA6			39.1	48.121	0.535053	0.764981	0.131114	1.21346	0.467142	0.753753	-0.163213	-1.07957	29.6502	29.5993	29.5821	29.531	29.8692	29.8247	29.7938	29.4674	29.4741
B2RDE8;A0A384NPW1;P51858;A8K8G0;B7Z958;B7Z525	B2RDE8;A0A384NPW1;P51858;A8K8G0;B7Z958;B7Z525	Hepatoma-derived growth factor	HDGF			32.1	26.805	0.47925	0.792943	0.18968	1.10357	0.156632	0.907372	0.0622431	0.418288	26.1898	25.8905	26.0307	25.9544	26.4658	26.2599	26.274	26.2881	26.3047
B4DWN1;A8K7T4;A0A384NPY7;Q12907;D6RBV2;D6RIU4;D6RDX1;D6RBH1	B4DWN1;A8K7T4;A0A384NPY7;Q12907;D6RBV2;D6RIU4	Vesicular integral-membrane protein VIP36	LMAN2			38.6	32.577	0.497305	0.782514	-0.0966256	-1.13924	0.268393	0.846001	-0.10139	-0.670919	26.3327	26.338	26.1528	26.2177	26.0617	26.2543	26.3523	25.9072	25.9699
A0A384NPZ7;Q15738;C9JDR0	A0A384NPZ7;Q15738;C9JDR0	Sterol-4-alpha-carboxylate 3-dehydrogenase, decarboxylating	NSDHL			27.9	41.9	0.345226	0.859533	-0.0566667	-0.833143	0.347991	0.810261	0.0572885	0.838857	25.9109	25.6859	25.826	25.7704	25.7149	25.7674	25.8205	25.6885	25.9157
B4DRA0;A0A384NQ03;Q14498;Q6N037;E1P5S2;B4DLM0;B3KWX7;Q68DD9;B4E1M7;B7Z4L7;Q6MZY7;H0Y4X3;Q7Z3L0;G3XAC6;A0A0U1RQH7;A0A0U1RQW2;Q5QP23;Q5QP22;F8WF24;F2Z3E6;F2Z2Z5;A0A087X122;F8WF73;A8MYG5	B4DRA0;A0A384NQ03;Q14498;Q6N037;E1P5S2;B4DLM0;B3KWX7;Q68DD9;B4E1M7;B7Z4L7;Q6MZY7;H0Y4X3;Q7Z3L0;G3XAC6;A0A0U1RQH7	RNA-binding protein 39	RBM39;DKFZp686A11192;RNPC2;DKFZp781C0423;DKFZp686C17209;DKFZp781I1140			33.1	56.41	0.715373	0.675364	0.0757122	1.56521	0.512202	0.722918	-0.268265	-1.16858	26.3898	26.4836	26.5443	26.5453	26.5188	26.5806	26.5406	26.4756	25.8238
A0A384NQ21;P61163;R4GMT0;B4DM97;B4DXP9;A0A1B0GVS3;B4DMT4	A0A384NQ21;P61163;R4GMT0;B4DM97;B4DXP9;A0A1B0GVS3;B4DMT4	Alpha-centractin	ACTR1A			50	42.613	0.648074	0.705218	0.324089	1.43404	0.771853	0.601232	0.326777	1.67572	27.5674	26.9217	27.1584	27.4154	27.789	27.4154	27.5939	27.8947	28.1115
J3KS22;A0A384NY14;Q7Z4W1;J3QL34;J3QS36;J3QS45;J3KRZ4;J3KSZ5;J3QRQ2	J3KS22;A0A384NY14;Q7Z4W1;J3QL34;J3QS36;J3QS45;J3KRZ4;J3KSZ5	L-xylulose reductase	DCXR			37.2	23.803	0.303785	0.880667	-0.0419509	-0.746525	1.30363	0.491644	0.167915	2.78231	26.07	26.0013	25.8914	25.9226	25.9881	25.926	26.073	26.0424	26.225
B2R761;A0A384NY87;P22307;B4E0J3;H0YF61	B2R761;A0A384NY87;P22307	Non-specific lipid-transfer protein	SCP2			11.3	59.021	0.982966	0.567476	0.307637	2.09704	1.62309	0.459746	0.32972	3.54909	25.536	25.4765	25.8566	25.9573	26.0664	25.7683	26.3236	26.2409	26.2167
A0A384NY94;Q5T5Y3;B7ZLW1	A0A384NY94;Q5T5Y3;B7ZLW1	Calmodulin-regulated spectrin-associated protein 1	CAMSAP1			4.4	177.97	0.476245	0.794488	0.164494	1.09762	0.485441	0.741911	-0.705448	-1.11581	23.9415	23.4706	23.7916	23.7881	23.9703	23.9389	21.9572	24.0192	23.6046
Q5JP53;A0A384NYT8;Q5SU16;P07437;B7ZAF0;B4DY90;Q6LC01;Q5ST81;B7ZAK1;Q9BUU9;B4E052;B4DQN9;B4DMU8;Q96B85;B4DXZ5;B4DMJ5;Q1KSF8;Q6P602;A4UCT2;A4UCU2	Q5JP53;A0A384NYT8;Q5SU16;P07437;B7ZAF0;B4DY90;Q6LC01;Q5ST81;B7ZAK1;Q9BUU9;B4E052;B4DQN9;B4DMU8;Q96B85;B4DXZ5;B4DMJ5	Tubulin beta chain	TUBB			65.3	47.766	2.41642	0.308	0.313295	6.0209	0.24946	0.85131	0.0365473	0.629745	31.8496	31.8754	31.7334	32.0969	32.1886	32.1128	32.2326	32.0691	32.2063
Q0D2I8;A0A384P5E9;P28161;E9PHN7;A8HT81;E9PHN6;F6XZQ7;E9PLF1;Q9UE37;E9PGV1	Q0D2I8;A0A384P5E9;P28161;E9PHN7;A8HT81;E9PHN6;F6XZQ7;E9PLF1	Glutathione S-transferase Mu 2	GSTM2			47.7	25.684	0.362005	0.85494	0.185746	0.867719	0.671889	0.649834	0.291936	1.48042	25.5402	26.0751	26.0641	25.8372	26.1854	26.214	26.1373	26.3093	26.6657
B7Z4V2;V9HW84;A0A384P5G6;P38646;Q8N1C8;B7Z4T3;B7Z1V7;A1XP52;A0A3B3ITI4;Q2F839;D6RJI2;D6RA73;H0Y8S0;H0YBG6;A0A3B3ITN1	B7Z4V2;V9HW84;A0A384P5G6;P38646;Q8N1C8;B7Z4T3;B7Z1V7	Stress-70 protein, mitochondrial	HEL-S-124m;HSPA9			63.9	72.4	0.0669358	0.973312	0.00522486	0.191906	0.0772764	0.953726	0.0150998	0.219514	30.2956	30.2499	30.3021	30.2845	30.2519	30.3269	30.2086	30.2718	30.4282
E9PP21;Q9BTA4;B4DY28;Q6ZMS3;A0A384P5K2;P21291;E9PND2;Q6AI18;B4E2T4;E9PS42;Q59EQ5;Q6AWD1;B3KVC9	E9PP21;Q9BTA4;B4DY28;Q6ZMS3;A0A384P5K2;P21291;E9PND2;Q6AI18;B4E2T4;E9PS42;Q59EQ5	Cysteine and glycine-rich protein 1	CSRP1;DKFZp686M148			40	16.94	0.583554	0.751009	-0.165657	-1.30831	1.20065	0.523763	0.237752	2.55454	24.9114	25.168	25.3435	24.9432	24.9814	25.0013	25.3823	25.1887	25.0681
A0A384P5L6;P16930;H0YLC7;B7Z4W2;H3BNP8	A0A384P5L6;P16930	Fumarylacetoacetase	FAH			20	46.374	0.591719	0.746679	0.718221	1.32423	0.580634	0.689875	0.320674	1.30261	23.7185	22.0099	23.5153	23.7063	23.9156	23.7765	23.6652	24.224	24.4712
A0A384P5Q0;P04040;B4DWK8;Q8TAK2;A0A1C9J7V9	A0A384P5Q0;P04040;B4DWK8	Catalase	CAT			38	59.755	0.0805827	0.971055	-0.0179202	-0.228246	0.561073	0.692716	0.226549	1.2644	27.5282	27.748	27.6917	27.6872	27.5531	27.6738	27.5646	27.8618	28.1674
D6RGI3;A0A384P5S0;D6RER5;Q9NVA2;D6RDU5;Q96KC0;H0Y961;D6RDP1;D6R9Y6;H0Y9G8	D6RGI3;A0A384P5S0;D6RER5;Q9NVA2;D6RDU5;Q96KC0;H0Y961	Septin-11	2011-09-01			43.1	49.005	2.55531	0.3056	0.175172	6.56564	2.2839	0.387125	-0.360119	1899-12-24 11:06:56	27.6098	27.5586	27.6348	27.7474	27.7898	27.7915	27.4752	27.4838	27.2894
H0YN26;Q6PKH8;Q08AJ6;A0A384P5U2;P39687;Q3KPI8;Q1AHP8;H7BZ09;O95626;O43423	H0YN26;Q6PKH8;Q08AJ6;A0A384P5U2;P39687;Q3KPI8;Q1AHP8	Acidic leucine-rich nuclear phosphoprotein 32 family member A	ANP32A			33.3	19.997	0.597936	0.740125	0.284089	1.33636	0.105291	0.936331	-0.0665137	-0.292135	25.6508	25.6508	25.9806	25.6849	26.1785	26.2711	26.1701	26.0515	25.7133
A0A3B3IRI2;P17812;B4DMB5;A0A3B3IRQ8;A0A3B3ITF6;B4E1E0;A0A3B3ITB8;B7Z9C4;A0A3B3ISY3;A0A3B3ITH9	A0A3B3IRI2;P17812;B4DMB5;A0A3B3IRQ8;A0A3B3ITF6;B4E1E0;A0A3B3ITB8	CTP synthase 1;CTP synthase	CTPS1			44	63.723	0.622011	0.722744	0.0845178	1.38328	0.0100941	0.99378	-0.00396601	-0.0306388	27.4088	27.5251	27.6055	27.6247	27.6135	27.5548	27.3962	27.5525	27.8324
A0A3B3IRR6;A0A3B3IT54;A0A3B3ITA3;Q9H7E9	A0A3B3IRR6;A0A3B3IT54;A0A3B3ITA3;Q9H7E9	UPF0488 protein C8orf33	C8orf33			10.6	24.465	0.13633	0.941024	0.337624	0.369357	0.877812	0.586111	1.67082	1.88514	22.5028	22.0418	21.6518	20.9979	24.0245	22.1868	23.8804	24.1128	24.2285
A0A3B3IRW6;Q2KHR3;Q9H6S7;H0YCQ7;A0A3B3ISY4;B3KWV1	A0A3B3IRW6;Q2KHR3	Glutamine and serine-rich protein 1	QSER1			5.5	202.89	0.286144	0.889949	-0.109243	-0.709047	0.3964	0.795891	0.107361	0.937845	24.9551	24.9985	24.635	24.8165	24.5524	24.892	24.9393	24.8758	24.7678
A0A3B3IS06;J3KQ96;E7ETY2;Q13428;B4DRA2;Q59FZ2;H0Y8Y7;B4DLB1;Q9UFD4;H0YA99;A0A2R8Y857	A0A3B3IS06;J3KQ96;E7ETY2;Q13428;B4DRA2	Treacle protein	TCOF1			8	138.69	1.22212	0.542265	-0.278742	-2.60136	0.340427	0.808826	0.123679	0.823204	26.7366	26.4512	26.6366	26.2226	26.3126	26.4529	26.2459	26.4081	26.7052
A0A3B3IS55;B3KSG3;A0A2Z4N5U1;O14639;B4DQA3	A0A3B3IS55;B3KSG3;A0A2Z4N5U1;O14639;B4DQA3	Actin-binding LIM protein 1	ABLIM1			24.6	94.097	0.145965	0.938463	0.0529448	0.392722	0.392124	0.793903	0.11429	0.929178	26.9451	27.157	26.9616	27.3041	26.9908	26.9277	27.1348	27.1644	27.2662
A0A3B3ISG5;P14735;Q59GA5;B3KSB8;B7Z7W6;Q5T5N3	A0A3B3ISG5;P14735;Q59GA5	Insulin-degrading enzyme	IDE			29.6	117.94	0.833175	0.636236	0.146698	1.79651	0.793445	0.604307	-0.0761611	-1.71814	28.1727	28.4313	28.3295	28.4498	28.4073	28.5165	28.3514	28.3502	28.4436
B3KVY3;A0A3B3ISH6;Q5HYL4;Q86U38	B3KVY3;A0A3B3ISH6;Q5HYL4;Q86U38	Nucleolar protein 9	DKFZp686E1893;NOP9			11.2	20.415	0.0265503	0.995192	-0.0345128	-0.0791741	1.21562	0.51958	0.767859	2.58714	23.0854	22.507	21.9241	22.6549	22.8346	21.9235	23.4364	23.1857	23.0944
X5D7J0;A0A3F2YNW9;A0A3B3IUA1;A0A3B3IU40;A0A3B3IT28;A0A3B3ITE5;A0A3B3ITF7;A0A3B3ITW6;Q12756;A0A3B3ITK3;F8W8V9;H7C0K6;X5D2L7;H7C3Y8;B4DMM0;A0A024R4H4;Q4R9M7;Q4R9M8;A0A087WWA3;Q4R9M9;O60333;O43896	X5D7J0;A0A3F2YNW9;A0A3B3IUA1;A0A3B3IU40;A0A3B3IT28;A0A3B3ITE5;A0A3B3ITF7;A0A3B3ITW6;Q12756;A0A3B3ITK3;F8W8V9	Kinesin-like protein;Kinesin-like protein KIF1A	KIF1A			12.1	191.02	0.066107	0.973246	0.0236123	0.189672	0.335998	0.813716	0.107634	0.814011	26.1437	26.2571	26.3569	26.1867	26.1502	26.4915	26.5217	26.2594	26.3703
E9PC15;B4E2Z8;A0A3B3ITD0;A4D1U5;Q53H12;A0A3B3ISY9;A0A3B3ISZ0;A0A0G2JLG5;E9PG39;B4DR72;A0A3B3ITV0;A0A3B3ITX7;A0A0G2JLD0;A0A3B3IUC9;A0A3B3IS09	E9PC15;B4E2Z8;A0A3B3ITD0;A4D1U5;Q53H12;A0A3B3ISY9;A0A3B3ISZ0;A0A0G2JLG5;E9PG39;B4DR72	Acylglycerol kinase, mitochondrial	AGK;FLJ10842			40.9	43.796	0.261437	0.900988	0.0264505	0.655856	0.0314836	0.983894	0.01349	0.0934072	26.8204	26.8954	26.8081	26.9165	26.8728	26.814	26.6022	26.982	27.0596
A0A3B3ITJ4	A0A3B3ITJ4					59.2	59.218	2.35359	0.287789	-0.152644	-5.78724	0.852631	0.59561	0.139126	1.83506	31.8972	31.9442	31.914	31.8105	31.7488	31.7382	31.7698	31.9277	32.0175
B7ZB72;A0A3B3ITN0;Q86TP1;Q5SZG1	B7ZB72;A0A3B3ITN0;Q86TP1;Q5SZG1	Protein prune homolog	PRUNE			16	18.537	0.90269	0.612827	-0.543904	-1.93485	2.41691	0.420952	0.760189	6.02275	22.9974	22.8958	22.1456	22.0693	22.3005	22.0374	22.8828	23.0669	22.7379
A0A3B3ITS5;Q14181	A0A3B3ITS5;Q14181	DNA polymerase alpha subunit B	POLA2			11.5	64.516	0.0212494	0.996599	0.0352325	0.0637216	0.241021	0.856365	0.209377	0.611212	22.8105	24.1859	24.1024	24.0325	23.0799	24.0919	24.011	23.749	24.0725
A0A3B3ITU8;A0A3B3IU04;A0A3F2YNW8;Q14643;A0A3B3ITQ1;A0A024R2E1;A0A024R2I2;B4DER3;A0A3B3IU05;A0A3B3IRP0;A0A3B3IU13;A0A3B3ITM1;A0A3B3ITQ4;A0A3B3IS70;B4DJU3;B4DGH1;A0A3B3ITM6;B7ZMI3;Q59H91	A0A3B3ITU8;A0A3B3IU04;A0A3F2YNW8;Q14643;A0A3B3ITQ1;A0A024R2E1;A0A024R2I2;B4DER3;A0A3B3IU05	Inositol 1,4,5-trisphosphate receptor type 1	ITPR1			3.4	312.29	0.17373	0.926569	0.199385	0.458648	0.283365	0.84047	-0.406205	-0.703107	23.161	23.0023	22.8249	23.7311	23.4964	22.3588	23.0343	23.3129	22.0205
Q6FHM6;B1AHD1;A0A3B3IUA2;P55769;A0A3B3IRU2	Q6FHM6;B1AHD1;A0A3B3IUA2;P55769	NHP2-like protein 1;NHP2-like protein 1, N-terminally processed	NHP2L1			40.6	14.173	0.047078	0.986991	-0.0164185	-0.137516	0.0533609	0.968359	-0.0210349	-0.154929	27.0358	26.9121	27.0101	26.9059	26.8131	27.1897	27.0071	26.8	27.0385
A0A3B3IUB1;Q13144;A0A3B3ITG6;A0A3B3IUF2;A0A3B3ISM8;A0A3B3ISX3;A0A3B3IS56;A0A3B3IRP4;Q59HD8;A0A3B3ITQ2;A0A3B3ISS1;A0A3B3ISV1;C9JRD9;A0A3B3IT53;A0A3B3ITK8;A0A3B3IST9;A0A3B3ISI2;H7C2X0	A0A3B3IUB1;Q13144;A0A3B3ITG6;A0A3B3IUF2;A0A3B3ISM8;A0A3B3ISX3;A0A3B3IS56;A0A3B3IRP4;Q59HD8;A0A3B3ITQ2	Translation initiation factor eIF-2B subunit epsilon	EIF2B5			16.9	81.222	0.0825533	0.971702	-0.0136484	-0.233428	0.581066	0.690728	0.0654519	1.30345	26.2306	26.1259	26.2901	26.1384	26.2157	26.2516	26.3415	26.24	26.2206
A0A3B3IUD7;Q14690;B4DH82;B4DES7;S4R3Q4	A0A3B3IUD7;Q14690;B4DH82	Protein RRP5 homolog	PDCD11			36.9	208.83	1.54403	0.458065	-0.212443	-3.34982	1.5473	0.473616	0.139838	3.35793	29.5642	29.7304	29.5566	29.4587	29.3929	29.3623	29.4841	29.5682	29.5811
A0A3F2YNW7;Q8NFD5;H0Y7H8;A0A1B0GVK1;A0A1B0GWJ2;A0A1B0GTJ8;A0A1B0GV63;B4DYC0;H0Y2R3;Q9NWF5;H0Y3S9;A0A1B0GTI6;A0A1B0GU09;A0A1B0GUC6;A0A1B0GUG2;Q8TEE4;A0A1B0GV92;A0A1B0GVH0;A0A1B0GTE8;A0A1B0GU65	A0A3F2YNW7;Q8NFD5;H0Y7H8;A0A1B0GVK1;A0A1B0GWJ2;A0A1B0GTJ8;A0A1B0GV63	AT-rich interactive domain-containing protein 1B	ARID1B			22.4	245.48	1.35047	0.510636	-0.0871493	-2.88873	2.13654	0.383814	-0.182281	-5.03607	28.0823	28.1194	28.0738	27.9818	27.9743	28.058	27.7736	27.8457	27.8479
A0A3F2YNY6;O75400;Q05C41;F5H578;B4DPY2;H0YG38;Q4ZG51;H7C2N3;F8VU11;Q6NWY9	A0A3F2YNY6;O75400;Q05C41;F5H578;B4DPY2	Pre-mRNA-processing factor 40 homolog A	PRPF40A			15.9	112.4	1.24875	0.535237	-0.164101	-2.65991	0.139089	0.92058	0.0642637	0.376076	27.4645	27.476	27.5931	27.3457	27.2681	27.4275	27.1026	27.4671	27.6644
A0A3G2LMN0;Q9BW60;Q502X7	A0A3G2LMN0;Q9BW60;Q502X7	Elongation of very long chain fatty acids protein 1;Elongation of very long chain fatty acids protein	ELOVL1			9	32.722	3.11549	0.2436	-0.901157	-9.22772	0.486216	0.743136	0.216455	1.11735	26.7789	26.9631	27.0846	26.1014	25.964	26.0578	25.9857	26.1648	26.622
A0A3S6H812;A0A3Q8AM27;E9PKG1;A0A3S6H7E9;A0A3S6H7X4;Q99873;A0A3Q8ATF5;Q5U8W9;A0A3S6H7G3;A0A3Q8APW9;A0A3Q8B022;A0A3Q8APX7;A0A3Q8B027;A0A3S6H7Y4;A0A3S6H7Z6;A0A3S6H7K8;A0A3S6H824;A0A3Q8AIR8;A0A3Q8BCI7;A0A3S6H942;E9PIX6;B4DJ87;E9PQ98;A0A3S6H765;A0A3Q8BCJ2;A0A3S6H950;A0A3S6H960;A0A3Q8APY3;A0A3S6H8A6;A0A3Q8AIS2;A0A3Q8B4M4;E9PNR9;A0A3S6H8B5;H0YDE4;A0A3S6H7X9;A0A3Q8ATG4;A0A3Q8AIS5;A0A3Q8B4N0;A0A3Q8B9M7;A0…	A0A3S6H812;A0A3Q8AM27;E9PKG1;A0A3S6H7E9;A0A3S6H7X4;Q99873;A0A3Q8ATF5;Q5U8W9;A0A3S6H7G3;A0A3Q8APW9;A0A3Q8B022;A0A3Q8APX7;A0A3Q8B027;A0A3S6H7Y4;A0A3S6H7Z6;A0A3S6H7K8;A0A3S6H824;A0A3Q8AIR8;A0A3Q8BCI7;A0A3S6H942;E9PIX6;B4DJ87;E9PQ98;A0A3S6H765;A0A3Q8BCJ2;A0A3S6H950;A0A3S6H960;A0A3Q8APY3;A0A3S6H8A6;A0A3Q8AIS2;A0A3Q8B4M4	Protein arginine N-methyltransferase 1	PRMT1;HRMT1L2			58.5	43.862	0.00948041	0.997635	-0.00248845	-0.0287955	0.0208939	0.989513	0.00613785	0.0626794	29.698	29.6996	29.7264	29.7163	29.5516	29.8487	29.62	29.7398	29.7752
A0A494BZU6;A0A494BZW7;A0A494C0P9;A0A494C1K5;A0A494C0Q2;A0A494C1N1;A0A494C0W0;O95453;A0A494C156;A0A494C1G3;A0A494C0Q6;A0A494C0K5;A0A494C002;H3BRK1;F5H1Z4;B3KN69;B4E0E8	A0A494BZU6;A0A494BZW7;A0A494C0P9;A0A494C1K5;A0A494C0Q2;A0A494C1N1;A0A494C0W0;O95453;A0A494C156;A0A494C1G3;A0A494C0Q6;A0A494C0K5;A0A494C002;H3BRK1	Poly(A)-specific ribonuclease PARN	PARN			13.5	56.046	0.422844	0.811401	-0.0559476	-0.991172	0.135242	0.923598	0.0321013	0.3667	23.9735	23.9367	24.0972	23.895	23.9946	23.9499	24.1232	23.9757	23.8369
H0Y993;A0A494C028;P35659;H0Y8X0;B4DNW3;A0A494C198;D6R9L5;B4DFG0;D6RDA2;Q6MZJ9	H0Y993;A0A494C028;P35659;H0Y8X0;B4DNW3;A0A494C198;D6R9L5;B4DFG0	Protein DEK	DEK			17.4	43.247	0.196486	0.914941	-0.0637042	-0.511281	2.00553	0.381379	0.35476	4.62104	26.9855	26.6174	26.8561	26.6683	26.7229	26.8768	27.0697	27.0625	27.2
A0A494C0X2;A0A494C167;A0A494C148;A0A494C045;Q9UHD2;B4E164;A0A494C0R4;A0A494C0A8;A0A494C1M6;A0A494C079;A0A494C1I2	A0A494C0X2;A0A494C167;A0A494C148;A0A494C045;Q9UHD2;B4E164;A0A494C0R4;A0A494C0A8;A0A494C1M6;A0A494C079	Serine/threonine-protein kinase TBK1	TBK1			18.5	73.8	0.317197	0.87396	0.11792	0.774764	0.0871031	0.947936	0.0407302	0.245335	24.4516	24.7041	24.4987	24.8911	24.4377	24.6794	24.6037	24.9141	24.6126
A0A494C0D4;A0A494C146;B4DY76;P50336;A0A1W2PNH4;A0A494C0L4;F5H1I5;A0A494C0M9;D3DVG2;A0A1W2PRF9;F5GZT7;A0A1W2PPA5;Q96TC9;H0YFP3;B4DQQ7;B3KT30	A0A494C0D4;A0A494C146;B4DY76;P50336;A0A1W2PNH4;A0A494C0L4;F5H1I5;A0A494C0M9;D3DVG2;A0A1W2PRF9;F5GZT7;A0A1W2PPA5;Q96TC9;H0YFP3;B4DQQ7;B3KT30	Protoporphyrinogen oxidase	PPOX			6.9	40.206	1.38546	0.502837	-1.65303	-2.96946	0.15595	0.908243	0.273688	0.416663	23.757	23.6829	23.8208	21.3989	23.1968	21.706	22.0548	23.0752	21.9928
A0A494C0G7;Q9UNQ2;A8K9K8;B4DRY2;A0A0C4DGB1;D6RCL3	A0A494C0G7;Q9UNQ2;A8K9K8;B4DRY2;A0A0C4DGB1;D6RCL3	Probable dimethyladenosine transferase	DIMT1			25.9	35.692	0.0520812	0.982179	0.0243333	0.151398	0.202458	0.880721	0.0481459	0.524906	24.4385	24.0349	24.5078	24.2241	24.426	24.4041	24.3097	24.3614	24.5275
A0A494C0R8;I3L2B0;K7EIG1;I3L318;I3L3A3;I3L350;I3L4B5;Q6P4R2;Q9Y5I4	A0A494C0R8;I3L2B0;K7EIG1		CLUH			35	150.46	0.155665	0.935575	-0.0276457	-0.415983	0.54507	0.70738	-0.0859076	-1.23308	28.304	28.4593	28.4374	28.4601	28.3077	28.35	28.1824	28.3534	28.3242
A0A494C0X0;Q99426;K7EK42;K7EP07;K7EL99;K7EQH0;K7ER04	A0A494C0X0;Q99426;K7EK42;K7EP07	Tubulin-folding cofactor B	TBCB			29.4	31.162	0.345118	0.859213	0.233785	0.832918	0.151912	0.910021	0.135782	0.407015	26.3502	25.6965	25.6499	25.8108	26.3668	26.2204	25.7058	26.4341	26.6655
A0A494C1F2;P35658;A0A024R8B6;Q7Z3C4;A0A0A0MSW3;A0A494BZU9;H0Y837;B7ZAV2;B7ZAX0;B4DYZ6;A0A494C104;H0YF36;A0A494C0Y1;H0YDS4;B4DZN4;E9PKD2	A0A494C1F2;P35658;A0A024R8B6;Q7Z3C4;A0A0A0MSW3	Nuclear pore complex protein Nup214	NUP214;DKFZp686J0330			28.4	212.48	0.364066	0.856514	-0.0364221	-0.871949	0.79388	0.605367	0.091671	1.719	28.2161	28.1592	28.1159	28.0934	28.1014	28.1873	28.3018	28.1515	28.2038
A0A494C1G7	A0A494C1G7					10.9	12.212	0.021068	0.996675	-0.0187848	-0.0631897	0.694503	0.644097	-0.392309	-1.5245	25.6428	25.1037	24.9409	25.4583	25.3763	24.7964	24.8071	25.0851	24.562
A0A494C1L5;E9PEM5;P50851;A0A494BZW2;Q59HC1;H0YAC6;A0A494C0R9;B3KVI6;H0Y9N9;A0A3B3IS13;Q68D03;H0YA17;A0A3B3ISK3	A0A494C1L5;E9PEM5;P50851;A0A494BZW2;Q59HC1;H0YAC6;A0A494C0R9	Lipopolysaccharide-responsive and beige-like anchor protein	LRBA			6.3	317.79	0.388956	0.839761	-0.14338	-0.922747	0.0730557	0.956003	0.0401853	0.208301	25.6602	25.8218	25.5565	25.7147	25.2718	25.6218	25.5776	25.3367	25.8146
A0A499FI31;Q15020;B4DYA2;F8VV04;B4DRG9;B4E3R6;H0YHU8;A0A494C0L2;F8W667;F8VVK9;F8VZM2	A0A499FI31;Q15020;B4DYA2;F8VV04;B4DRG9	Squamous cell carcinoma antigen recognized by T-cells 3	SART3			49.4	111.96	0.935008	0.594304	-0.142242	-1.9998	0.0910988	0.945754	-0.017299	-0.255723	31.3203	31.4121	31.3023	31.0937	31.3101	31.2041	31.2325	31.1432	31.1803
A0A499FI48	A0A499FI48					62.1	73.06	0.273235	0.89731	-0.122103	-0.681364	0.640607	0.670027	-0.840975	-1.41949	24.126	23.6713	23.6704	23.5151	23.8319	23.7545	21.6997	23.3099	23.5689
A0A499FIZ0;Q9H7D7;B4DRF0;H0Y9R3;C9JCS7;H0Y917	A0A499FIZ0;Q9H7D7;B4DRF0;H0Y9R3	WD repeat-containing protein 26	WDR26			12.5	81.327	0.163039	0.932671	0.0891495	0.433499	0.0448704	0.971741	-0.0228157	-0.13135	24.4287	24.4165	24.0464	24.481	24.0689	24.6091	24.2656	24.3521	24.4729
A0A4D5RAC7;Q6IPT9;Q6IPS9;Q6IPN6;Q53HR5;Q53HQ7;Q53HM9;Q5VTE0;P68104;Q53G85;A8K9C4;Q96RE1;A0A4D5RAE2;A0A4D5RAC9;Q53GA1;A0A087WVQ9;B4DV42;A0A4D5RAN2;A0A4D5RBG5;Q8IUB0;A0A4D5RA98;A0A4D5RA76;Q9NZS6;Q53G89;A0A4D5RA52;Q504Z0;B4E2C5;B4DNE0;A0A087WV01;Q9H2I7;Q6P4C9;Q16577;Q96CD8;A0A4D5RAR2;A9X7H1;A0A4D5RA61;Q96C29;Q8TBL1;Q6P082;A0A4D5RAF1;A0A4D5RBI9;A0A4D5RBK4;A0A4D5RAB8;A0A4D5RBH1;A0A4D5RBD4;Q14222;A0A4D…	A0A4D5RAC7;Q6IPT9;Q6IPS9;Q6IPN6;Q53HR5;Q53HQ7;Q53HM9;Q5VTE0;P68104;Q53G85;A8K9C4;Q96RE1;A0A4D5RAE2;A0A4D5RAC9;Q53GA1;A0A087WVQ9;B4DV42;A0A4D5RAN2;A0A4D5RBG5;Q8IUB0;A0A4D5RA98;A0A4D5RA76;Q9NZS6;Q53G89;A0A4D5RA52;Q504Z0;B4E2C5;B4DNE0;A0A087WV01;Q9H2I7;Q6P4C9;Q16577;Q96CD8;A0A4D5RAR2;A9X7H1;A0A4D5RA61	Elongation factor 1-alpha;Putative elongation factor 1-alpha-like 3;Elongation factor 1-alpha 1	EEF1A1;EEF1A1P5;EEF1A1L14;PTI-1			60.9	46.21	0.189913	0.918434	0.186267	0.496197	0.827228	0.601239	0.559268	1.78475	29.7357	29.0778	29.0233	28.9252	29.9516	29.5189	29.951	29.9031	30.2193
A0AV58;Q13033;G3V340;G3V3G7;H0YJZ4;H0YJT2;M0QXN2;Q0VAF9;Q0VAF8;M0R0W8	A0AV58;Q13033;G3V340	Striatin-3	STRN3			33.7	77.717	0.673864	0.692417	0.0799777	1.48427	0.101211	0.939148	0.0274232	0.281741	27.3332	27.3388	27.2606	27.3645	27.3247	27.4833	27.3509	27.317	27.5869
F8WF48;A0JLN5;R9WWI7;Q99442;F8WCJ7;Q3KR08;D3DNQ1	F8WF48;A0JLN5;R9WWI7;Q99442;F8WCJ7;Q3KR08;D3DNQ1	Translocation protein SEC62	SEC62;TLOC1			45.9	9.8703	0.111194	0.9527	-0.0892913	-0.307064	0.214727	0.870719	0.178735	0.552668	24.1081	24.7024	24.7235	24.7065	24.0135	24.546	24.6552	24.1493	24.9977
B2RAJ6;A0JP11;Q99570;D6RJ98;D6RAC3;D6RBB7	B2RAJ6;A0JP11;Q99570	Phosphoinositide 3-kinase regulatory subunit 4	PIK3R4			13.4	153.19	0.108123	0.955295	0.03228	0.299312	0.0949145	0.94296	0.0223026	0.265586	25.816	26.1555	25.9005	26.0308	26.0179	25.9201	25.8599	26.1006	26.0753
A0M8W4;Q15819;G3V113;H0YBP9;H0YBX6;E5RIF1;D6RG00	A0M8W4;Q15819;G3V113;H0YBP9;H0YBX6	Ubiquitin-conjugating enzyme E2 variant 2	UBE2V2			64.1	16.363	3.40039	0.377	0.320177	10.9313	1.18189	0.5189	0.259967	2.5139	27.1766	27.1936	27.1525	27.4935	27.5412	27.4485	27.9015	27.7979	27.5638
A0MNN4;Q2TAY7	A0MNN4;Q2TAY7	WD40 repeat-containing protein SMU1;WD40 repeat-containing protein SMU1, N-terminally processed	SMU1			32.9	57.543	1.08589	0.528548	-0.118533	-2.30973	0.528572	0.71056	0.0536143	1.20074	27.6912	27.782	27.7845	27.6742	27.5518	27.6761	27.6585	27.7186	27.6859
A0MNP2;Q96DI7;B2R9I9;Q9NSS8	A0MNP2;Q96DI7;B2R9I9	U5 small nuclear ribonucleoprotein 40 kDa protein	WDR57;SNRNP40			63	39.31	0.0621812	0.977935	0.0138035	0.179052	0.666375	0.655543	-0.0796789	-1.46968	27.1444	27.08	26.9537	27.1725	26.9915	27.0556	27.0075	27.0024	26.9706
A0PJ79;Q9BYD6;H0Y8N7	A0PJ79;Q9BYD6;H0Y8N7	39S ribosomal protein L1, mitochondrial	MRPL1			14.2	34.446	0.39904	0.830315	-0.563262	-0.943191	0.165407	0.90188	-0.428711	-0.439093	23.7695	23.6251	23.7103	23.7987	21.9494	23.6671	21.2289	23.0618	23.8383
A0PJJ9;A4FU32;A5D8W8;Q9UJ14	A0PJJ9;A4FU32;A5D8W8;Q9UJ14	Gamma-glutamyltransferase 7;Gamma-glutamyltransferase 7 heavy chain;Gamma-glutamyltransferase 7 light chain	GGT7			5.9	62.565	1.02215	0.552895	0.467484	2.17732	0.508754	0.725	-0.124091	-1.1618	22.599	22.3222	22.9867	23.1744	23.2199	22.916	22.887	23.0565	22.9946
A0PJK4;B3KTT0;Q8NFH3;Q8TEA6	A0PJK4;B3KTT0;Q8NFH3	Nucleoporin Nup43	NUP43			15	31.614	0.609192	0.730129	0.241935	1.3583	0.342744	0.811919	0.209475	0.828006	23.965	23.8738	23.8357	23.7875	24.2749	24.3379	24.7046	24.2182	24.106
A1L020;Q6ZN04	A1L020	RNA-binding protein MEX3A	MEX3A			21	54.173	0.263208	0.900028	0.0845915	0.659698	1.34235	0.470547	-0.222598	-2.87014	24.7535	25.1071	25.1248	25.0097	25.0726	25.1569	24.9675	24.7431	24.8607
A1L0S9;A1L0S8;B1AKD8;Q5TZA2;A0A087WW81;A0A087WU09;A0A4D6DSY5	A1L0S9;A1L0S8;B1AKD8;Q5TZA2;A0A087WW81	Rootletin	CROCC			2.5	129.52	0.842471	0.633634	-1.06671	-1.81491	0.948848	0.569654	-0.904412	-2.02775	25.6178	24.649	24.2176	24.5485	23.128	23.6077	23.0605	22.5464	22.9641
M0R026;A1L0T0;M0R1B5;E9PJS0;Q59GP4;M0QZX5;E9PL44	M0R026;A1L0T0;M0R1B5;E9PJS0;Q59GP4	Acetolactate synthase-like protein	ILVBL			35.6	56.732	0.423774	0.811208	-0.080773	-0.993039	1.12831	0.523921	0.200417	2.3992	25.7494	25.964	26.0084	25.8105	25.856	25.8129	25.8896	26.1739	26.0171
A1L3A9;B9A6K8;Q66K14;B3KM54;B3KQE0	A1L3A9;B9A6K8;Q66K14	TBC1 domain family member 9B	TBC1D9B			3.3	138.54	0.422453	0.810543	-0.383856	-0.990386	0.561086	0.69324	0.504091	1.26442	23.16	22.9652	23.0156	22.9095	21.9115	23.1683	23.3461	23.1889	22.9665
Q9NXG9;A1L3Z9;Q2TAL8;Q9H9Z1	Q9NXG9;A1L3Z9;Q2TAL8;Q9H9Z1	Glutamine-rich protein 1	QRICH1			26.2	47.549	0.585864	0.75058	0.229431	1.31281	0.888152	0.583288	0.258545	1.90578	26.0111	25.6168	25.9593	25.8891	26.3152	26.0711	26.4264	26.2405	26.3841
A4D1D2;A1L471;P08183;Q59GY9;Q6RVA0;Q4G0Q4;P21439;Q6TBL4;O60213;E7EWT8;A7J1S5;I7D7J2;I7CY13;A7J1R4;A7J1R3;A7J1R2;F4ZV79;F4ZUX9;F4ZUV0;B5U2G4;H7C0M2	A4D1D2;A1L471;P08183;Q59GY9	Multidrug resistance protein 1	ABCB1			31.3	141.48	0.141813	0.939188	-0.0247746	-0.382687	0.124867	0.923867	0.0452798	0.341197	28.3649	28.4327	28.4437	28.3725	28.2946	28.5	28.2041	28.5012	28.5976
A1X283;G3V144;A0A1B0GUF2	A1X283	SH3 and PX domain-containing protein 2B	SH3PXD2B			29.6	101.58	0.701537	0.678077	-0.0688992	-1.53821	1.60293	0.471046	0.158705	3.49761	27.1544	27.1101	27.1937	27.0102	27.1063	27.135	27.223	27.2925	27.2121
A2A2Q9;Q9Y312	A2A2Q9;Q9Y312	Protein AAR2 homolog	AAR2			19.3	45.034	0.347125	0.859319	0.146437	0.837068	0.12908	0.9214	0.0607821	0.351594	24.5164	25.0497	24.9022	25.0317	24.8238	25.0522	24.826	24.9259	25.3381
Q96DV6;A2A3R6;P62753;A2A3R5;A2A3R7;Q9BZU1	Q96DV6;A2A3R6;P62753;A2A3R5	40S ribosomal protein S6	RPS6			36.9	28.708	0.743212	0.660254	-0.119357	-1.61961	0.7202	0.622476	0.266253	1.57464	30.1663	30.2179	30.1855	29.9446	30.1945	30.0725	30.0318	30.469	30.5096
A2NX49;A0A0C4DGT1;A0A087X0W4;B4DYJ7;A0A087WVR6;A0A087X2F8;A0A087X126;A0A087WYK6;S4R3S7;A0A087WUA1	A2NX49					39.2	264.54	0.259062	0.901432	0.326239	0.650696	NaN	1	0	NaN	22.1328	22.471	22.2957	21.7601	23.4629	22.6551	23.0951	21.8641	21.7366
A2RRC9;Q86VI3;F2Z2E2	A2RRC9;Q86VI3;F2Z2E2	Ras GTPase-activating-like protein IQGAP3	IQGAP3			16.9	184.52	0.0779162	0.972562	0.0285028	0.221207	0.919281	0.580037	-0.374459	-1.96814	26.4259	26.6067	26.5268	26.7609	26.3543	26.5297	25.9006	26.2056	26.4153
G1UI26;A2RRP1;H0Y5G7;H7BZU5	G1UI26;A2RRP1;H0Y5G7	Neuroblastoma-amplified sequence	NBAS			3.3	176.34	0.0433966	0.988489	0.0052592	0.127219	0.379773	0.799614	-0.655214	-0.904063	22.9703	23.0622	22.9267	22.9715	22.9958	23.0077	22.6578	23.3997	20.9519
A2RUM7;P46777;A0A2R8Y6J3;B3KTM6;Q5T7N0;A0A2R8Y4A2;Q9BUV4;Q8WYP1;R4GNJ2	A2RUM7;P46777;A0A2R8Y6J3;B3KTM6	60S ribosomal protein L5	RPL5			59.6	34.362	0.0437657	0.989772	0.0131925	0.128255	0.360852	0.807156	0.145115	0.865351	30.1398	30.3171	30.2607	30.1908	30.427	30.1393	30.1284	30.4513	30.6128
A2TJK5;Q5JWS0;H0Y5K5;Q9Y282;A6PVJ3;H0Y621;O95330;A0A1W2PPS8;B4DV36;Q5JWS1;H0Y802;Q5JWS2;H0Y6Z0;A6PVJ2;A0A0C4DH46	A2TJK5;Q5JWS0;H0Y5K5;Q9Y282;A6PVJ3;H0Y621;O95330;A0A1W2PPS8;B4DV36	Endoplasmic reticulum-Golgi intermediate compartment protein 3	ERGIC3			25.6	43.222	0.0340841	0.991041	0.0156409	0.100854	0.377199	0.803042	-0.236591	-0.898815	26.9915	27.4153	27.2585	27.3063	27.0524	27.3535	26.5254	27.1284	27.3487
Q6NUN2;A3F769;A3F768;O15226;A2I829;A2I832;A2I828;A1Z1A7;A2I831;A2I830	Q6NUN2;A3F769;A3F768;O15226;A2I829	NF-kappa-B-repressing factor	NKRF;NRF			22.9	77.703	0.038639	0.988796	-0.00587336	-0.113808	0.47149	0.749287	0.0906588	1.0882	26.4114	26.5816	26.5021	26.5185	26.4946	26.4644	26.4866	26.517	26.7459
B7Z9S8;A6NGH2;Q6LEU2;A3KLL5;P05026;Q58I20;V9GYR2	B7Z9S8;A6NGH2;Q6LEU2;A3KLL5;P05026;Q58I20	Sodium/potassium-transporting ATPase subunit beta-1	ATP1B1			15.4	28.627	2.12545	0.338526	-0.301562	-4.99986	0.721317	0.622736	0.105173	1.57682	24.345	24.3814	24.2718	24.1317	23.9663	23.9954	24.2208	24.1081	24.0801
A3KMH1;B3KT81	A3KMH1;B3KT81	von Willebrand factor A domain-containing protein 8	VWA8			22	214.82	0.437167	0.808685	-0.0912317	-1.01987	0.102364	0.938433	-0.0334161	-0.284685	27.4301	27.5307	27.3855	27.51	27.249	27.3137	27.1496	27.4089	27.4139
A3KN83;B3KUC1;Q9NVJ3;K7ES28;Q9Y2G9	A3KN83;B3KUC1	Protein strawberry notch homolog 1	SBNO1			8.8	154.31	0.0944206	0.96689	-0.0361417	-0.264313	0.392406	0.794115	-0.101493	-0.929751	24.3627	24.2695	24.6092	24.4314	24.1988	24.5029	24.3321	24.3384	24.1581
Q4VB24;B2R984;A3R0T8;A3R0T7;P10412;A1L407;P22492;Q02539	Q4VB24;B2R984;A3R0T8;A3R0T7;P10412	Histone H1.4	HIST1H1E			23.3	21.893	0.244617	0.904233	-0.066452	-0.619123	0.16514	0.901937	0.13448	0.438465	28.9811	29.044	28.7937	28.978	28.724	28.9175	28.4233	29.2076	29.392
A3RJH1;Q92499;F1T0B3;A0A087X2G1;B4DP70	A3RJH1;Q92499;F1T0B3;A0A087X2G1;B4DP70	ATP-dependent RNA helicase DDX1	DDX1			49.9	82.431	0.2297	0.904771	-0.044082	-0.586158	0.445726	0.764	0.133394	1.03697	29.5597	29.735	29.6111	29.6799	29.4925	29.6012	29.4995	29.7843	29.8899
Q53FC8;A8K8C0;A4D0P7;O43913;Q9UDM8;G3V0H0;B4DXT8;Q8NDU9	Q53FC8;A8K8C0;A4D0P7;O43913;Q9UDM8	Origin recognition complex subunit 5	ORC5L;ORC5			13.6	50.283	0.774669	0.645571	-0.171972	-1.68125	1.24004	0.511117	-0.171412	-2.6407	25.7994	25.4977	25.6282	25.5603	25.376	25.4731	25.3296	25.2244	25.3411
B2RDR4;A4D0U5;Q9UGI8;Q53GU1;E0X098;F8W7T0;B7Z5L5;B7Z6L5;Q9Y423;H7BYK1;F8WDI4	B2RDR4;A4D0U5;Q9UGI8;Q53GU1;E0X098	Testin	TES			42.5	47.966	0.552125	0.758336	0.105344	1.24689	0.328005	0.816631	0.067922	0.797372	28.1717	28.3779	28.401	28.3592	28.4038	28.5037	28.3747	28.4686	28.6272
Q53GE2;Q53GC7;A4D0V4;P47755;B4DE01;C9JUG7;F8W9N7;A0A0D9SET8	Q53GE2;Q53GC7;A4D0V4;P47755;B4DE01	F-actin-capping protein subunit alpha-2	CAPZA2			29.7	32.967	0.683425	0.691159	0.956619	1.5029	0.353511	0.807314	0.546872	0.850248	22.3449	22.3006	22.2691	21.9901	23.938	23.8563	23.6224	23.9354	23.8673
A4D0Y1;A8K180;O00401	A4D0Y1;A8K180;O00401	Neural Wiskott-Aldrich syndrome protein	WASL			18.4	52.684	0.459106	0.800358	0.0860984	1.06361	0.270242	0.844722	-0.0446847	-0.674912	25.2474	25.2267	25.4277	25.2875	25.4283	25.4442	25.3733	25.2558	25.3969
A4D0Z3;P84085;C9J1Z8;B4DLJ3;F5H1V1;F5H6T5;F8WDB3	A4D0Z3;P84085;C9J1Z8;B4DLJ3	ADP-ribosylation factor 5	ARF5			64.4	20.529	1.89775	0.39478	-0.191243	-4.29909	1.06763	0.528178	-1.70203	-2.27156	25.1647	25.2267	25.2993	25.0399	25.0759	25.0011	22.882	22.3284	24.8004
A4D105;P35244;B5MC59	A4D105;P35244;B5MC59	Replication protein A 14 kDa subunit	RPA3			28.9	13.569	0.244918	0.906936	-0.062397	-0.619785	1.09551	0.53317	0.266158	2.32994	24.3565	24.2826	24.5127	24.4595	24.2043	24.3007	24.4338	24.5955	24.7338
A4D177;Q13185;C9JMM0;B8ZZ43;S4R2Y4	A4D177;Q13185	Chromobox protein homolog 3	CBX3			33.3	20.811	0.392293	0.838438	0.0909157	0.929521	0.392601	0.794821	0.247163	0.930145	27.0532	27.1151	27.1927	27.2848	27.315	27.0339	27.9429	27.3255	27.1068
A4D1N4;C9JRZ6;Q9NX63;B7Z1X9;F8WAR4;A0A286YEX5	A4D1N4;C9JRZ6;Q9NX63;B7Z1X9;F8WAR4;A0A286YEX5	MICOS complex subunit MIC19	CHCHD3			21.6	26.152	0.460816	0.799042	0.179946	1.06701	1.12404	0.522507	-0.53555	-2.39015	26.4605	26.8006	26.3128	26.8529	26.5514	26.7094	26.4943	26.2266	25.7861
Q567R6;A4D1U3;Q04837;A0A0G2JLD8;E7EUY5;B7Z268;C9K0U8	Q567R6;A4D1U3;Q04837;A0A0G2JLD8;E7EUY5;B7Z268;C9K0U8	Single-stranded DNA-binding protein;Single-stranded DNA-binding protein, mitochondrial	SSBP1			58.8	17.359	0.129845	0.944153	0.0238342	0.353475	1.36903	0.474385	-0.322798	-2.93143	28.9245	28.7977	28.7744	28.8805	28.9255	28.7622	28.7176	28.5024	28.3797
A4D1X5;Q92556;B4DJV6;C9JIW2;C9IZR8;B4DVN0;C9J5X3;C9JB20	A4D1X5;Q92556;B4DJV6	Engulfment and cell motility protein 1	ELMO1			14.9	83.829	0.660614	0.708551	-0.131683	-1.45846	0.539699	0.70658	0.194665	1.22256	25.195	25.4334	25.2391	25.0582	25.2384	25.1758	25.064	25.4226	25.5698
A4D212;A4D213;Q8N201;Q9BT91	A4D212;A4D213;Q8N201	Integrator complex subunit 1	DKFZP586J0619;INTS1			4.6	265.75	0.11107	0.952177	0.067035	0.306753	0.0229135	0.988424	-0.0207888	-0.0685907	24.5062	24.8446	24.5437	24.7819	24.9788	24.3349	25.1403	24.3675	24.5254
A4D275;O15143;C9JEY1;C9K057;C9J4Z7;F8VXW2;C9JQM8;C9JFG9;C9J6C8;C9JTT6;C9JBJ7;C9JM51;F8WEB3	A4D275;O15143;C9JEY1;C9K057	Actin-related protein 2/3 complex subunit 1B	ARPC1B			41.9	40.949	0.113303	0.951588	-0.221955	-0.312369	0.519601	0.71764	0.399115	1.18313	27.0244	24.9981	26.9006	25.5409	26.3148	26.4015	26.1255	26.5231	26.806
A4D299;J3KR72;P49848;B3KUR4;C9JHQ8;E5RKA5;F8WEJ7;C9J7C4;C9JIS2;E5RHA1;C9J088;C9JFL8;C9JTY6	A4D299;J3KR72;P49848;B3KUR4	Transcription initiation factor TFIID subunit 6	TAF6			12.1	71.479	0.159228	0.933377	0.155991	0.424464	0.508326	0.724318	-0.710873	-1.16095	22.6166	23.6918	23.4822	23.4991	23.1049	23.6546	22.4574	23.8329	21.8357
Q9UES0;B5BU81;A4D2J0;O15498;H7C3K7	Q9UES0;B5BU81;A4D2J0;O15498	Synaptobrevin homolog YKT6	YKT6			22	21.606	0.8926	0.61907	0.351653	1.91466	0.0623007	0.961062	-0.0336348	-0.179377	25.2454	25.4598	25.5055	25.4353	25.8434	25.987	25.5467	25.8342	25.7838
A4D2P1;A4D2P0;P63000;A4D2P2;A0A024R9T5;A0A024R1P2;P15153;B1AH77;B1AH78;B1AH80	A4D2P1;A4D2P0;P63000;A4D2P2;A0A024R9T5;A0A024R1P2;P15153	Ras-related C3 botulinum toxin substrate 1;Ras-related C3 botulinum toxin substrate 2	RAC1;hCG_20693;RAC2			41.1	21.45	0.458872	0.799733	-0.123933	-1.06315	0.377739	0.802414	0.239458	0.899916	28.9979	29.0638	28.939	28.9449	29.0246	28.6594	28.6628	29.1953	29.4893
A4LAA3;P46100;B4DHH8;B4DLE1;A0A096LNL9;A0A096LNW1;B7Z1D8;B4DLW1;A0A096LNN3;A0A096LNX6;A0A087WWG0;Q86U63;Q5H9A3;H0Y3T0;A0A096LNL6;A0A096LP59	A4LAA3;P46100;B4DHH8	Transcriptional regulator ATRX	ATRX			13.2	282.58	2.15943	0.340604	-0.288692	-5.11139	0.0260605	0.989029	-0.00820859	-0.0777533	27.9748	27.9973	27.8784	27.6414	27.5989	27.7441	27.4607	27.7428	27.7563
B4DFY5;A4QPA9;Q02750	B4DFY5;A4QPA9;Q02750	Dual specificity mitogen-activated protein kinase kinase 1	MAP2K1			19.4	41.378	1.07021	0.53481	-0.935612	-2.27695	2.89951	0.299111	1.29979	8.10407	23.3895	22.5716	23.8878	22.4321	22.061	22.549	23.5387	23.7599	23.6428
A5PL36;E7ESU0;A0A024R2T9;E7EST9;O94966;B5MEG5;A4UCT4;B4DK86;A0A0A0MR08	A5PL36;E7ESU0;A0A024R2T9;E7EST9;O94966;B5MEG5	Ubiquitin carboxyl-terminal hydrolase;Ubiquitin carboxyl-terminal hydrolase 19	USP19			9.7	158.97	0.232217	0.90705	0.0824375	0.591747	0.0255985	0.989486	-0.0169271	-0.0764117	24.2969	24.3791	24.4052	24.3121	24.7137	24.3028	24.076	24.5816	24.6201
B4DXG8;D6RIY6;A5PLM5;Q06265;H0Y9L5;D6R905;D6RA17	B4DXG8;D6RIY6;A5PLM5;Q06265;H0Y9L5;D6R905	Exosome complex component RRP45	EXOSC9			11.2	43.561	0.320214	0.871219	-0.0662581	-0.781087	1.18849	0.521419	0.103746	2.52817	24.3699	24.2223	24.1065	24.1607	24.1053	24.234	24.3033	24.2625	24.2454
A5YKK6;B4DYL7;B3KPW6;H3BMZ2;B7Z6X2;B3KS60;H3BNB1;H3BVC9;B4DTM8;H3BR89;H3BTH2;H3BMH0	A5YKK6;B4DYL7	CCR4-NOT transcription complex subunit 1	CNOT1			26.7	266.94	0.232984	0.907473	-0.0760517	-0.593448	0.071714	0.957282	-0.0256316	-0.204721	29.0939	29.3848	29.2223	29.2865	28.9685	29.2179	28.9745	29.2309	29.1905
C9JLV4;A5YM44;O14727;A7E2A2;F8VNZ0	C9JLV4;A5YM44;O14727;A7E2A2	Apoptotic protease-activating factor 1	APAF1			4.5	132.46	0.126841	0.945691	-0.0432173	-0.346075	0.532139	0.707609	0.131119	1.20774	24.0795	24.3435	23.9829	24.2152	24.0547	24.0065	24.0526	24.2689	24.3483
E7EMV2;B4DJT7;E7ESP9;A5YM63;P07197;Q5RLN2;Q9UK51	E7EMV2;B4DJT7;E7ESP9;A5YM63;P07197	Neurofilament medium polypeptide	NEFM			23.2	78.881	0.360567	0.855558	-0.204416	-0.864766	0.41189	0.784641	-0.186604	-0.969138	25.4807	25.9154	25.9079	25.7911	25.1912	25.7084	25.4228	25.4169	25.2912
E7EW84;A5YP36;Q8TAG9;B4DEZ1;B1AP46;B3KXY5;B7Z6G5;B2RDH5;Q9NUN4;F2Z3K0;Q9NTA6	E7EW84;A5YP36;Q8TAG9;B4DEZ1;B1AP46;B3KXY5;B7Z6G5	Exocyst complex component 6	EXOC6;SEC15L3			10.3	81.851	0.190405	0.918715	-0.0584723	-0.49733	0.0713897	0.957124	0.0491346	0.203854	24.1465	24.4862	24.2728	24.223	24.1455	24.3617	24.7174	24.2439	23.9162
A6H8W6;O43166;F5GYF8;B4DYX7;H0YJY2	A6H8W6;O43166;F5GYF8;B4DYX7	Signal-induced proliferation-associated 1-like protein 1	SIPA1L1			5.8	199.97	0.969493	0.57773	-0.0750771	-2.06961	0.726512	0.623092	-0.195109	-1.58696	25.1731	25.1132	25.0624	25.0291	25.0748	25.0195	24.7704	24.6834	25.0843
A6NFX8;Q9UKK9;A6NJU6;A6NCQ0;C9JYY9;H0YEY4	A6NFX8;Q9UKK9;A6NJU6;A6NCQ0	ADP-sugar pyrophosphatase	NUDT5			31.9	25.895	0.677755	0.695233	0.257214	1.49185	0.902602	0.584465	0.175788	1.93468	25.4623	24.9049	25.1469	25.315	25.5222	25.4486	25.4802	25.62	25.713
A6NHR9;J3KTL8;A0A2R8YCU7;A0A2R8YE92;J3KRK8;J3QSH1	A6NHR9;J3KTL8	Structural maintenance of chromosomes flexible hinge domain-containing protein 1	SMCHD1			29.5	226.37	1.7475	0.424598	-0.182089	-3.87708	1.18713	0.517835	-0.0752074	-2.52524	28.6101	28.6399	28.4921	28.4226	28.3951	28.378	28.274	28.3662	28.33
A6NHX0;F2Z3I9;F2Z2C1;F8WD52;A4D2B4;B7WPJ3;Q8WTX7	A6NHX0	GATS-like protein 2	GATSL2			8.5	36.056	0.539784	0.76341	0.0805251	1.22273	0.451747	0.762394	-0.262749	-1.04897	23.212	23.1629	23.0111	23.1821	23.1842	23.2613	22.5077	22.9614	23.3703
A6NIT2;A6NMN0;P46020	A6NIT2;A6NMN0;P46020	Phosphorylase b kinase regulatory subunit alpha, skeletal muscle isoform	PHKA1			4.9	132.63	0.101441	0.960774	-0.050965	-0.282329	1.49218	0.482759	-0.38202	-3.22271	24.9451	24.6775	24.3902	24.4626	24.6519	24.7453	24.0966	24.3888	24.2285
A6NKG5;B9EK54	A6NKG5;B9EK54	Retrotransposon-like protein 1	RTL1			47.6	155.05	1.2176	0.53844	-0.209238	-2.59146	0.151414	0.910883	-0.0274035	-0.405821	31.3014	31.391	31.5349	31.2291	31.1143	31.2562	31.0696	31.2319	31.2159
A6NMQ1;P09884;A0A087WU64	A6NMQ1;P09884;A0A087WU64	DNA polymerase;DNA polymerase alpha catalytic subunit	POLA1			12.2	166.46	0.410939	0.821383	0.0779031	0.967222	0.136521	0.922765	0.0136083	0.369822	27.0122	26.8054	26.7802	26.8803	26.9905	26.9607	26.9761	26.9247	26.9716
A6PVH9;F2Z2V0;B0QZ18;Q99829;E7ENH5;Q5JX56;Q5JX58;Q5JX59;Q5JX60;Q5JX44;Q59EI4;Q5JX55;Q5JX45;Q5JX54;Q5JX61;Q5JX52;Q5JX57;E7EV27;H0Y524	A6PVH9;F2Z2V0;B0QZ18;Q99829;E7ENH5;Q5JX56;Q5JX58;Q5JX59;Q5JX60;Q5JX44;Q59EI4;Q5JX55;Q5JX45	Copine-1	CPNE1			15.6	53.046	0.362687	0.856193	0.1115	0.869118	1.51509	0.486967	-0.278092	-3.27853	25.8591	25.5262	25.5803	25.7859	25.8882	25.626	25.498	25.5476	25.4201
A6PVN5;Q15257;B4DZF8;Q68CR8;Q5T949;Q5T948;F6WIT2;A6PVN6;A6PVN9;B4DLX5;B7ZBQ0;A6PVN8;C9IZ76;B7ZBP9;A6PVN7;B7ZBP7;B4DDQ6;H0Y6E5	A6PVN5;Q15257;B4DZF8;Q68CR8;Q5T949;Q5T948;F6WIT2;A6PVN6;A6PVN9;B4DLX5	Serine/threonine-protein phosphatase 2A activator	PPP2R4;DKFZp781M17165			32.8	37.375	0.76857	0.653194	0.176041	1.66928	0.418177	0.781798	-0.0730877	-0.981794	24.6356	24.3615	24.4638	24.5375	24.7743	24.6772	24.5493	24.5753	24.6451
A7BI36;Q9P2E9;A1A5C4;A0A087WVV2;F8W7S5;A1A5C5;B3KSG1;A0A087WU26;A2A2S5;Q32NB1;H0YDJ4;H9KV85;Q5XUU0;E9PN67;C9J066;Q8N4C6	A7BI36;Q9P2E9;A1A5C4;A0A087WVV2;F8W7S5;A1A5C5	Ribosome-binding protein 1	RRBP1			10.6	165.75	0.195734	0.914426	-0.0685457	-0.509561	0.266158	0.847194	-0.0942408	-0.666086	26.0966	26.143	26.2043	26.1569	25.8242	26.2572	25.9833	25.893	26.0793
S4R3H3;S4R393;S4R410;A7E2V4;H7BZ52;H0YCW2;S4R3B3;H7C453;S4R3U7	S4R3H3;S4R393;S4R410;A7E2V4;H7BZ52;H0YCW2;S4R3B3;H7C453;S4R3U7	Zinc finger SWIM domain-containing protein 8	ZSWIM8			3.6	178.85	0.855833	0.627712	-0.292471	-1.84142	0.547049	0.705496	0.0405401	1.23696	24.0859	24.246	24.617	23.9835	24.0284	24.0597	24.0161	24.0875	24.0897
M0R0F9;A7VJC9;Q15642;W4VSQ9	M0R0F9;A7VJC9;Q15642;W4VSQ9	Cdc42-interacting protein 4	TRIP10;STP			5	49.712	0.760795	0.655539	-0.217713	-1.65404	0.183886	0.89333	-0.194674	-0.482283	22.8429	22.901	23.0207	22.7914	22.4651	22.8549	21.7416	22.9496	22.8362
B4DQW4;Q53GV4;A7YA96;P38435	B4DQW4;Q53GV4;A7YA96;P38435	Vitamin K-dependent gamma-carboxylase	GGCX			6.6	66.259	1.01904	0.553551	-1.41378	-2.17092	0.241216	0.856694	-0.406699	-0.611641	23.8116	24.0925	24.1169	22.4706	23.7646	21.5444	22.1311	21.9304	22.498
A8CG34;B4DET5;A6NF01;C9JER0;C9J370;A0A0J9YWR1;Q6PJE2;B4DDR5	A8CG34	Nuclear envelope pore membrane protein POM 121C	POM121C			16.4	125.09	1.59301	0.440438	-0.210504	-3.47246	0.0801181	0.952435	0.0440063	0.227022	25.4091	25.5644	25.4231	25.3201	25.2009	25.2441	25.6619	25.2193	25.0159
Q8IYS3;Q53FW7;B2R8X4;A8IE48;Q06546	Q8IYS3;Q53FW7;B2R8X4;A8IE48;Q06546	GA-binding protein alpha chain	GABPA			4.8	51.311	0.373695	0.844271	-0.649962	-0.89166	0.566872	0.69109	0.889955	1.27573	24.048	23.2571	23.5529	23.7429	21.5898	23.5753	23.7196	24.034	23.8243
Q05DQ6;A8K031;O14777	Q05DQ6;A8K031;O14777	Kinetochore protein NDC80 homolog	NDC80;KNTC2			11.6	60.307	0.153863	0.935641	0.0457026	0.411682	0.311748	0.818797	-0.785603	-0.763315	26.0718	25.8115	25.7474	25.9053	25.8463	26.0163	26.2438	26.0841	23.0831
B3KUZ6;Q53H01;A8K0B6;D3DSQ1;A0A1B0GTP7;A0A1B0GUE3;A0A1B0GUW4;E7EMM4;A0A1B0GW68;A0A1B0GUA4;A0A1B0GTM3;A0A1B0GTZ5;Q13510;A0A1B0GV06;A0A1B0GUG1;A0A1B0GUH5;B1B5S8;B1B5Q8;B1B5Q3;B1B5Q2;B1B5S5;B1B5S6;A0A1B0GVA3;A0A1B0GW66;B1B5S7;A0A1B0GUJ3;A0A1B0GW48;B1B5T7;B1B5T0;B1B5R8;B1B5P6;A0A1B0GVJ1;A0A1B0GVE7;A0A1B0GU62;A0A1B0GU06;B1B5Q9;B1B5Q0;A0A1B0GUB3;A0A1B0GVG2	B3KUZ6;Q53H01;A8K0B6;D3DSQ1;A0A1B0GTP7;A0A1B0GUE3;A0A1B0GUW4;E7EMM4;A0A1B0GW68;A0A1B0GUA4;A0A1B0GTM3;A0A1B0GTZ5;Q13510;A0A1B0GV06;A0A1B0GUG1;A0A1B0GUH5	Acid ceramidase;Acid ceramidase subunit alpha;Acid ceramidase subunit beta	ASAH1			20.7	34.594	0.860284	0.630133	0.432601	1.85026	0.570889	0.689801	0.301051	1.28358	24.1234	23.955	23.9012	24.2759	24.8664	24.1351	24.5995	24.8385	24.7425
E5KTM5;A8K0B9;Q8WVM0	E5KTM5;A8K0B9;Q8WVM0	Dimethyladenosine transferase 1, mitochondrial	TFB1M			14.5	39.542	0.362582	0.85588	0.163481	0.868902	0.615457	0.683916	-0.151491	-1.37051	23.4078	23.8998	23.8458	23.7185	24.079	23.8464	23.6871	23.7946	23.7077
A8K0P8;Q68CQ4;B3KVX2;H7C2R4	A8K0P8;Q68CQ4	Digestive organ expansion factor homolog	DIEXF			11.8	87.056	0.153123	0.936117	-0.0958983	-0.409912	0.700213	0.641224	0.41284	1.53563	23.553	24.0395	23.9875	24.1092	23.5326	23.6505	24.1058	23.8658	24.5592
A8K132;O94925;Q53TX0;H7BZD1;Q53RX0;C9JIJ6;B7Z2P1;Q53S89	A8K132;O94925;Q53TX0	Glutaminase kidney isoform, mitochondrial	GLS			20.6	73.508	0.832755	0.635528	-0.148652	-1.79568	0.311849	0.819239	0.0498441	0.763528	26.6294	26.486	26.4369	26.2906	26.3305	26.4852	26.4731	26.39	26.3928
B3KWN9;A8K182;E6Y3G0;E6Y3F9;Q8WY21;A0A087WTI0;A0A087WTQ9;A0A0A0MRC2;B3KX79;X6R7D6;B3KVZ0	B3KWN9;A8K182;E6Y3G0;E6Y3F9;Q8WY21;A0A087WTI0;A0A087WTQ9;A0A0A0MRC2;B3KX79;X6R7D6;B3KVZ0	VPS10 domain-containing receptor SorCS1	SORCS1			4.9	125.82	0.0931403	0.967693	-0.0677427	-0.261007	0.902162	0.583614	-0.960001	-1.9338	24.6038	24.5009	24.8058	24.7452	24.0876	24.8744	22.8593	23.6103	24.3577
J3QQW9;A8K1U9;Q15022	J3QQW9;A8K1U9;Q15022	Polycomb protein SUZ12	SUZ12			6.4	80.321	1.29785	0.506248	0.347754	2.7693	0.697462	0.643059	-0.817813	-1.53027	23.9435	23.8492	23.9911	24.0407	24.3673	24.4191	23.2002	24.4613	22.7121
A8K245;Q99986;H0YJ50;H0YJF7	A8K245;Q99986;H0YJ50	Serine/threonine-protein kinase VRK1	VRK1			11.1	45.445	0.384029	0.838456	0.119734	0.912731	0.784127	0.604005	-0.180305	-1.69982	24.3749	24.5355	24.6871	24.7142	24.4651	24.7774	24.4188	24.5647	24.4323
A8K2M0;P43686	A8K2M0;P43686	26S protease regulatory subunit 6B	PSMC4			51.2	47.366	0.387591	0.838553	0.126215	0.919974	0.277074	0.838782	-0.134796	-0.689619	27.1076	27.009	27.0664	27.4019	26.9404	27.2193	27.3266	26.9802	26.8504
A8K2U2;P52789;E9PB90;Q68E10;Q53SG7;Q53QX9;Q09LL6;A0A024R7R1;Q59H08;P52790;Q7Z7Q6	A8K2U2;P52789;E9PB90;Q68E10;Q53SG7	Hexokinase;Hexokinase-2	HK2;DKFZp686M1669			29.8	102.36	0.51759	0.778309	-0.0682767	-1.17918	0.293121	0.835858	-0.0393651	-0.723917	27.8139	27.7484	27.8631	27.7251	27.6667	27.8288	27.6631	27.6871	27.7523
A8K321;B4DZ55;Q6ZXV5;F8W044;F8VRY4;F8VR71	A8K321;B4DZ55;Q6ZXV5	Transmembrane and TPR repeat-containing protein 3	TMTC3			10.2	102.03	1.00976	0.55631	-0.0921733	-2.15186	1.21479	0.518135	0.140401	2.58533	25.2827	25.3364	25.2498	25.1288	25.2237	25.2398	25.2847	25.4204	25.3085
B7ZLP5;A8K329;Q15424;B7Z2Z1;B7Z5X3;B7Z959;B7Z1C7;B7Z2F6;B7Z2H3;K7ES42;K7EII0	B7ZLP5;A8K329;Q15424;B7Z2Z1;B7Z5X3;B7Z959;B7Z1C7;B7Z2F6	Scaffold attachment factor B1	SAFB			22.4	102.58	0.437142	0.808152	-0.148905	-1.01982	0.778156	0.602816	0.156413	1.68809	28.5499	28.2692	28.1149	28.2871	28.1606	28.0396	28.3092	28.2219	28.4255
A8K330;Q8IWA0;Q05D27	A8K330;Q8IWA0	WD repeat-containing protein 75	WDR75			20.9	92.249	2.23937	0.343636	-0.0842832	-5.38152	0.112645	0.932794	0.0076046	0.310717	25.8958	25.8629	25.8809	25.8188	25.7916	25.7763	25.7664	25.8394	25.8037
A8K335;Q92820;B4DVI2	A8K335;Q92820;B4DVI2	Gamma-glutamyl hydrolase	GGH			23.9	36.047	0.0398577	0.989889	0.0112794	0.117255	0.363193	0.806256	0.210141	0.870157	25.4082	25.2279	25.1025	25.3031	25.2856	25.1837	25.0511	25.4743	25.8776
G3V1S1;B3KTH1;B3KRG2;A8K359;P19447;Q53HW5;A0A2R8Y6W8;A0A2R8Y681;A0A2R8Y5H0;B4DTK4;A0A2R8YFS3;A0A2R8Y762;A0A2R8YES7;A0A2R8Y5L2	G3V1S1;B3KTH1;B3KRG2;A8K359;P19447;Q53HW5;A0A2R8Y6W8;A0A2R8Y681	TFIIH basal transcription factor complex helicase XPB subunit	ERCC3			11.6	81.983	0.428391	0.810164	-0.155499	-1.0023	0.316913	0.820651	0.20753	0.774168	23.7943	23.7847	23.4343	23.5208	23.3395	23.6865	24.2142	23.41	23.5451
A8K3A8;P47897;Q53HS0;B4DNN3;A0A1B0GVU9;Q96AW5;Q9BUZ3;B4DDN1;Q9H3A5;C9J165;A0A0U1RQT0;H7C0R3;A0A0U1RR66;B7Z840;A0A0U1RQQ5;A0A1B0GTT3;A0A0U1RQX5;B4DTH6;A0A0U1RQM8;A0A0U1RQU2;A0A0U1RRI9;A0A0U1RQE9;A0A0U1RQJ6;A0A0U1RQL2;A0A0U1RRC8;F2Z2V6;A0A0U1RQX9;I3QNU8;A0A0U1RRJ7;A0A0U1RQC3;A0A0U1RR79	A8K3A8;P47897;Q53HS0;B4DNN3;A0A1B0GVU9;Q96AW5;Q9BUZ3;B4DDN1;Q9H3A5	Glutamine--tRNA ligase	QARS			56.1	87.808	0.0128238	0.998549	-0.00247192	-0.0388071	0.3495	0.809522	-0.0667305	-0.841974	29.8435	29.9263	29.8322	29.9636	29.7684	29.8626	29.6941	29.8848	29.8155
B2R6E5;A8K3B4;Q59ED7;P16435;Q63HL4;H0Y4R2;B4DJI8;B4DKM8;E7EMD0;B4DDH3;B4E305;C9JU80;E7EWU0	B2R6E5;A8K3B4;Q59ED7;P16435;Q63HL4;H0Y4R2;B4DJI8;B4DKM8;E7EMD0;B4DDH3	NADPH--cytochrome P450 reductase	POR;DKFZp686G04235			32.5	77.02	0.556578	0.75235	0.165335	1.25561	0.329121	0.816776	0.105412	0.7997	27.4127	27.2807	27.2475	27.248	27.6605	27.5285	27.6221	27.4839	27.6473
Q53EL3;B5BU52;B2R6Q4;A8K3B6;P41240;B4DP99;B4DMZ0;H3BUM9;H3BU69;K7ENL8;K7ES68;Q16176;K7EQY5;F1T0G6;B2RDR6;P42679	Q53EL3;B5BU52;B2R6Q4;A8K3B6;P41240;B4DP99;B4DMZ0	Non-specific protein-tyrosine kinase;Tyrosine-protein kinase CSK	CSK			21.6	50.617	0.516251	0.778407	0.133568	1.17654	0.166521	0.901548	0.0440203	0.44172	25.2258	25.4985	25.2753	25.3195	25.5046	25.5762	25.4127	25.6307	25.489
Q6IAX4;A8K3B9;B7Z4K5;A8MT72;Q2NKQ5;Q16799	Q6IAX4;A8K3B9;B7Z4K5;A8MT72;Q2NKQ5;Q16799	Reticulon;Reticulon-1	RTN1			19.2	23.561	0.760199	0.654216	0.42807	1.65287	0.349334	0.809027	-0.180164	-0.841633	25.8278	25.3073	25.896	25.7547	26.3541	26.2065	25.718	26.1169	25.9399
Q6PKC2;Q86Y74;A8K3C5;J3KPP4;O95232;B4DJ96;D6RDI2;E7EN55;C9JL41	Q6PKC2;Q86Y74;A8K3C5;J3KPP4;O95232;B4DJ96;D6RDI2	Luc7-like protein 3	CROP;LUC7L3			31.8	27.016	0.810922	0.64277	0.264388	1.75256	0.394801	0.794801	0.172691	0.934606	24.7093	24.4909	24.515	24.6544	25.0978	24.7561	24.7824	25.0218	25.2222
F8VXB0;B7Z1Q8;B3KMB9;A8K3E7;Q8NEU8;F8VWV2;F8W124	F8VXB0;B7Z1Q8;B3KMB9;A8K3E7;Q8NEU8;F8VWV2	DCC-interacting protein 13-beta	APPL2			20	26.757	0.149651	0.938166	0.114873	0.401593	0.151276	0.910593	0.106724	0.40549	23.1811	22.6089	22.6061	22.4882	23.1349	23.1175	23.3237	22.814	22.9231
B7Z6P1;A8K3K1;P68133;P68032;D2JYH4;P63267;P62736;B3KUD3;B3KW67;Q13707;Q7Z7J6;A6NL76;B4DUI8;F8WB63;B8ZZJ2;C9JFL5;F6UVQ4;F6QUT6;B7Z6I1;B3KPP5;F8WCH0;K4EQ44;K4EP00;K4ENJ5;A0A173GMX0;Q562Y4;Q562X7;Q562X6;Q562X4;Q562X2;Q562X1;Q562X0;Q562W2;Q562U1;Q562U0;Q562T8;Q562T6;Q562T5;Q562T4;Q562T3;Q562T0;Q562R6;Q562R5;Q562R0;Q562Q9;Q562Q8;Q562Q6;Q562Q4;Q562Q2;Q562Q0;Q562P8;Q562L3	B7Z6P1;A8K3K1;P68133;P68032;D2JYH4;P63267;P62736;B3KUD3;B3KW67;Q13707;Q7Z7J6;A6NL76;B4DUI8;F8WB63;B8ZZJ2;C9JFL5;F6UVQ4;F6QUT6;B7Z6I1	Actin, alpha skeletal muscle;Actin, alpha cardiac muscle 1;Actin, gamma-enteric smooth muscle;Actin, aortic smooth muscle	ACTA1;ACTC1;ACTA2;ACTG2			39.1	38.579	0.342841	0.859087	0.262273	0.828206	0.286548	0.839707	0.31369	0.70991	30.3517	29.9335	30.0645	29.7967	30.6995	30.6404	30.0639	31.1921	30.8216
B3KSW0;Q53HA5;A8K3L7;B3KY94;O14735;H3BUR9	B3KSW0;Q53HA5;A8K3L7;B3KY94;O14735;H3BUR9	CDP-diacylglycerol--inositol 3-phosphatidyltransferase	CDIPT			11.4	20.246	0.48083	0.792647	-0.369259	-1.1067	1.76879	0.395881	-0.475077	-3.9351	24.7646	25.2597	25.9027	25.0062	24.8358	24.9772	24.6255	24.5107	24.2577
A8K3M3;P18031;B4DSN5	A8K3M3;P18031;B4DSN5	Tyrosine-protein phosphatase non-receptor type;Tyrosine-protein phosphatase non-receptor type 1	PTPN1			27.8	49.966	0.0505828	0.983731	0.0155392	0.147254	0.666187	0.65514	0.157753	1.46931	25.6817	25.7232	25.6261	25.6133	25.8944	25.57	25.8148	25.8171	25.9191
A8K3S0;P40937;Q6LES9;Q59GW7;A8K4Z2;C9JH72;F5H304;F5H5S0;F5H0U6;E9PEP3	A8K3S0;P40937;Q6LES9;Q59GW7;A8K4Z2	Replication factor C subunit 5	RFC5			43.5	38.466	0.0700919	0.972827	-0.0100416	-0.200381	0.254014	0.852397	0.106922	0.6397	26.4401	26.508	26.5524	26.5637	26.4697	26.4369	26.2883	26.6621	26.8407
A8K3S1;P46926;D6RAY7;D6R9P4;B3KMV2;D6RFF8;D6R917;D6RB13	A8K3S1;P46926;D6RAY7;D6R9P4;B3KMV2;D6RFF8	Glucosamine-6-phosphate isomerase;Glucosamine-6-phosphate isomerase 1	GNPDA1			30.4	32.678	0.540923	0.76383	0.108776	1.22496	1.08823	0.53334	-0.255123	-2.31464	26.2104	26.1598	26.3046	26.4803	26.3066	26.2143	25.9308	26.195	26.11
B5BU16;A8K3Y2;P52564;A0A024R8K3;K7EIW3;Q6MZH7;C7DUW4;Q6FI23;Q6FHG1;Q53EZ9;P46734;A0A0A0MRF7;D3DXI2;A0A024QYT4;K7ELM6;E9PRZ0;D3DTD6;J3QR49	B5BU16;A8K3Y2;P52564;A0A024R8K3	Dual specificity mitogen-activated protein kinase kinase 6	MAP2K6			40.7	37.464	0.228092	0.905724	0.0542723	0.582582	0.391328	0.793996	0.0771116	0.927563	26.0646	25.9259	25.9089	26.163	26.0092	25.8899	26.1194	26.1276	26.0465
A8K3Z5;Q8NFH5;C9IYQ7;F8WCF5;F8WEL4;A8K0N6;C9JIY9;C9JWU7	A8K3Z5;Q8NFH5;C9IYQ7;F8WCF5;F8WEL4;A8K0N6	Nucleoporin NUP53	NUP35			33.7	34.814	0.47502	0.794028	0.143035	1.09519	0.958649	0.570853	-0.289132	-2.0476	24.7164	24.9052	24.8467	24.9593	24.7647	25.1736	24.7302	24.7758	24.5241
Q6PUJ7;A8K401;P35232;Q6FHP5;Q53FV0;C9JW96;C9JZ20;E7ESE2;E9PCW0;D6RBK0;A8K9G2;Q9BSE8	Q6PUJ7;A8K401;P35232;Q6FHP5;Q53FV0;C9JW96;C9JZ20;E7ESE2;E9PCW0	Prohibitin	HEL-S-54e;PHB			75.7	29.82	0.259016	0.900948	0.0595977	0.650595	0.858591	0.593939	0.193287	1.84689	29.1005	28.9661	29.1721	29.0277	29.2649	29.1249	29.4358	29.1777	29.3839
C9J8Q5;X5DNC0;X5DQN2;X5D8T4;A8K435;X5D299;P51649;B4DGP6;Q8N3W7	C9J8Q5;X5DNC0;X5DQN2;X5D8T4;A8K435;X5D299;P51649;B4DGP6	Succinate-semialdehyde dehydrogenase, mitochondrial	ALDH5A1			10.3	53.867	2.10648	0.3436	-0.207998	-4.93843	0.208201	0.873884	0.0722586	0.537939	23.2605	23.3679	23.3784	23.1172	23.1013	23.1642	23.2797	23.3797	22.9402
V9HWF5;A8K486;P62937;B2RE56;B4DM82;F8WE65;C9J5S7;Q71V99;P0DN26;A0A0H2UH34;A0A0B4J2A2;A0A075B767;A0A075B759;Q9Y536;F5H284;E5RIZ5;P0DN37;B2RXF3	V9HWF5;A8K486;P62937;B2RE56;B4DM82;F8WE65;C9J5S7;Q71V99	Peptidyl-prolyl cis-trans isomerase;Peptidyl-prolyl cis-trans isomerase A;Peptidyl-prolyl cis-trans isomerase A, N-terminally processed	HEL-S-69p;PPIA			78.2	18.012	0.802429	0.643151	0.16077	1.73582	0.258131	0.849556	0.0615565	0.648672	31.3897	31.3345	31.3047	31.3265	31.6103	31.5743	31.5618	31.623	31.511
A8K492;P56192;B4DF61;B4E0E9;H0YIP0;A0A024RBA2;H0YI94;H0YHV5;F5H2V6;F8VS26;F8W0M7;F8W0S4;F8VZZ9;F8VPL7;H0YHL6;H0YI27	A8K492;P56192;B4DF61	Methionine--tRNA ligase, cytoplasmic	MARS			40.1	101.14	0.14176	0.939084	-0.0361392	-0.382557	0.378219	0.80192	0.0353324	0.900895	28.4113	28.6943	28.6389	28.6174	28.5292	28.4895	28.5801	28.5991	28.5629
A8K4A1;Q96HW7;F8WAA7;E9PIM3	A8K4A1;Q96HW7	Integrator complex subunit 4	INTS4			21.3	108.15	0.0280078	0.994527	0.00655746	0.0833936	0.803692	0.599954	0.0511513	1.73831	25.8568	25.9938	25.7295	25.9044	25.8502	25.8452	25.9557	25.8778	25.9198
Q6NZ55;A8K4C8;P26373;J3QSB4;H3BTH3;O60250;B4DGL7;H3BUK8;J3KS98	Q6NZ55;A8K4C8;P26373;J3QSB4	60S ribosomal protein L13	RPL13			41.7	24.265	1.79368	0.402614	-0.222842	-4.00365	0.0790945	0.953292	0.0571925	0.224321	29.4903	29.5869	29.5592	29.4153	29.2568	29.2958	28.883	29.573	29.6835
Q59H57;B4DR70;A8K4H1;Q8TBR3;Q6IBQ5;H3BPE7;Q13344;P35637;Q70T18	Q59H57;B4DR70;A8K4H1;Q8TBR3;Q6IBQ5;H3BPE7;Q13344;P35637;Q70T18	RNA-binding protein FUS	FUS			26.3	31.994	0.412333	0.819278	0.213549	0.970031	1.09789	0.531422	0.506286	2.33493	28.2243	28.1458	27.9755	28.1589	28.7417	28.0857	28.9564	28.7464	28.8024
Q53H22;A8K4H7;Q06203;Q59G63;D6RCC8;D6RE15	Q53H22;A8K4H7;Q06203;Q59G63	Amidophosphoribosyltransferase	PPAT			26.3	57.384	2.1354	0.341818	0.379492	5.03234	0.0578324	0.964719	-0.0235354	-0.167205	26.3239	26.2825	26.4714	26.7184	26.832	26.6659	26.4636	26.772	26.91
A8K4I8;Q9BPW8;B4DQI7;H7C2U6;F8WCR5;C9JDV8	A8K4I8;Q9BPW8;B4DQI7;H7C2U6	Protein NipSnap homolog 1	NIPSNAP1			25	33.252	1.96264	0.392986	-0.783274	-4.4909	0.646424	0.668017	0.346545	1.43082	25.3764	25.7271	25.7863	24.6635	25.0687	24.8077	25.0477	25.6093	24.9226
Q5SZE3;H0YKH6;Q5SZE4;Q5SZE1;A8K4M4;Q96G23;Q5SZE2;H0YNU7	Q5SZE3;H0YKH6;Q5SZE4;Q5SZE1;A8K4M4;Q96G23;Q5SZE2;H0YNU7	Ceramide synthase 2	CERS2			17.7	23.253	0.0292274	0.99427	-0.0127703	-0.0869152	0.697092	0.64273	-0.271794	-1.52954	25.8217	25.8151	25.7772	26.0811	25.6852	25.6093	25.6511	25.5876	25.3217
A8K4M5;O60563;A0A1W2PQ16;Q9NR57;C9JUL2;H7BZ27	A8K4M5;O60563	Cyclin-T1	CCNT1			19	80.585	0.331051	0.865366	-0.104943	-0.803721	0.549002	0.703194	0.0541579	1.24078	25.4243	25.8173	25.7978	25.5222	25.5999	25.6025	25.5615	25.648	25.6775
A8K4T6;Q16401;F2Z3J2	A8K4T6;Q16401	26S proteasome non-ATPase regulatory subunit 5	PSMD5			30	56.223	0.872497	0.622011	0.174342	1.87455	0.00408101	0.998278	0.00102107	0.0124709	26.0222	26.2705	26.1765	26.2365	26.3182	26.4376	26.3164	26.2409	26.438
B4DRG7;E9PHA2;A8K4T8;Q15003;C9J470;C9JZP1;H7C415	B4DRG7;E9PHA2;A8K4T8;Q15003;C9J470	Condensin complex subunit 2	NCAPH			24.5	80.129	0.232869	0.907359	-0.0398076	-0.593194	1.27029	0.4965	-0.168788	-2.70765	25.8458	25.819	25.9513	25.8283	25.7415	25.927	25.6482	25.6175	25.7246
A8K4U4;Q5VSL9;Q8WUN4;A8K2A0;A4D1K4;Q9ULQ0	A8K4U4;Q5VSL9;Q8WUN4	Striatin-interacting protein 1	STRIP1;FAM40A			6.1	95.603	0.207706	0.909401	0.0513725	0.536817	0.328522	0.81673	0.0602169	0.798451	24.4186	24.6359	24.3918	24.4413	24.636	24.5231	24.6706	24.4998	24.6107
Q08ET0;A8K4W2;P24539;Q5QNZ2;Q53GB3	Q08ET0;A8K4W2;P24539;Q5QNZ2;Q53GB3	ATP synthase F(0) complex subunit B1, mitochondrial	hCG_39985;ATP5F1			30.1	28.908	0.321767	0.870955	0.100147	0.784339	0.678225	0.646154	-0.117458	-1.49277	26.7299	26.3902	26.3248	26.6053	26.5354	26.6047	26.4876	26.324	26.5813
H3BQQ9;A8K503;Q7KZS0;B0QYN7;P63279;H3BPC4	H3BQQ9;A8K503;Q7KZS0;B0QYN7;P63279;H3BPC4	SUMO-conjugating enzyme UBC9	UBE2I			46	15.516	0.422456	0.811129	0.0791461	0.990393	0.341579	0.809669	0.0749811	0.825592	27.8201	27.816	27.6848	27.7575	27.9806	27.8201	27.8062	27.9676	28.0094
A8K517;P62266;D6RD47;D6RDJ2;D6RIX0;D6R9I7	A8K517;P62266;D6RD47	40S ribosomal protein S23	RPS23			48.3	15.807	1.00988	0.557031	-0.127431	-2.15211	0.595022	0.684838	0.140897	1.33068	29.8619	29.81	29.9614	29.6857	29.8209	29.7444	29.7249	29.8832	30.0655
A8K548;Q8IZL8;C9JFV4;B4DR36;I3L445;E7EV54;B4DEX7;O15451;I3L4P1;I3L1P4;I3L4M7	A8K548;Q8IZL8;C9JFV4;B4DR36;I3L445;E7EV54;B4DEX7	Proline-, glutamic acid- and leucine-rich protein 1	PELP1			6.8	119.64	0.387619	0.839126	-0.178268	-0.92003	2.41209	0.417455	0.730666	6.00455	24.641	25.2242	25.0908	24.6475	24.8997	24.874	25.7181	25.4199	25.4751
A8K557;Q92481;B2R9E2;Q96SH1;P05549;Q6VUC0;C9JXZ2;H7C5E5;C1K3N0;B2RAN6;Q92754	A8K557;Q92481;B2R9E2	Transcription factor AP-2-beta	TFAP2B			22.9	49.269	0.478899	0.792134	0.138615	1.10288	0.598418	0.683759	-0.290799	-1.3373	26.7648	26.6074	26.5223	26.5639	26.8541	26.8923	26.8232	26.4519	26.1628
A8K564;Q9NW82;D6RIW8	A8K564;Q9NW82	WD repeat-containing protein 70	WDR70			5.4	73.19	0.0215986	0.996168	0.00564766	0.0647448	0.397352	0.794076	0.0833524	0.939773	24.3288	24.1893	24.2159	24.1552	24.1951	24.4006	24.4006	24.2463	24.3541
A8K586;A0A0S2Z5J4;O00203;Q3MNE1;A0A0S2Z4Z4;B4E0B2;H0YBD0	A8K586;A0A0S2Z5J4;O00203;Q3MNE1;A0A0S2Z4Z4;B4E0B2	AP-3 complex subunit beta;AP-3 complex subunit beta-1	AP3B1			22.2	121.29	0.504758	0.785943	-0.0795542	-1.15393	0.136113	0.922749	0.0258986	0.368829	27.3729	27.2675	27.3156	27.1676	27.1874	27.3623	27.2548	27.2132	27.327
Q59GY3;V9HVZ0;A8K588;Q13247;B4DEM8;B4DJK0;B4DUA4	Q59GY3;V9HVZ0;A8K588;Q13247	Serine/arginine-rich splicing factor 6	HEL-S-91;SRSF6			16.5	31.865	0.51271	0.781912	-0.167815	-1.16958	0.154169	0.909233	0.0468152	0.412414	26.8447	26.4312	26.4248	26.459	26.4033	26.3349	26.2794	26.4108	26.6475
A8K5D5;P49406;B4DIG4;S4R3W9;H7C2J0;A0A0A0MRF4	A8K5D5;P49406;B4DIG4;S4R3W9	39S ribosomal protein L19, mitochondrial	MRPL19			9.6	32.38	0.111119	0.952481	-0.0482992	-0.306876	0.0703421	0.957526	-0.0278473	-0.201051	24.2297	24.4796	24.7273	24.3262	24.5479	24.4176	24.5262	24.1574	24.5246
A8K5G2;Q13614;B4DDL6;C9JEX3;A0A024R3B7	A8K5G2;Q13614;B4DDL6;C9JEX3;A0A024R3B7	Myotubularin-related protein 2	MTMR2			8.9	73.352	0.0362702	0.991266	0.0200761	0.107086	0.541992	0.706255	-0.0558389	-1.22706	22.9545	23.5527	23.074	23.2664	23.2436	23.1314	23.1308	23.1507	23.1925
Q9Y2Q2;Q9NQ51;A8K5H7;Q96I63;Q96TA2;R4GNA5;Q5T8D2;Q5T8D1	Q9Y2Q2;Q9NQ51;A8K5H7;Q96I63;Q96TA2;R4GNA5;Q5T8D2;Q5T8D1	ATP-dependent zinc metalloprotease YME1L1	FTSH;YME1L1			5.6	57.668	0.62065	0.723064	0.212441	1.38062	0.682717	0.646371	-0.35274	-1.50152	23.2243	23.2223	23.4909	23.2758	23.625	23.6741	22.7827	23.4349	23.2991
A8K5J1;P11172;B5LY71;B5LY64;E9PFD2;B5LY67;B5LY70;B5LY69;F2Z3P2;F2Z303;F8WDG4	A8K5J1;P11172;B5LY71;B5LY64;E9PFD2;B5LY67;B5LY70;B5LY69	Uridine 5-monophosphate synthase;Orotate phosphoribosyltransferase;Orotidine 5-phosphate decarboxylase;Orotidine 5-phosphate decarboxylase	UMPS			40.4	52.221	0.175566	0.927249	-0.0562738	-0.462939	0.0652673	0.962254	0.0232245	0.187407	27.9245	27.8229	27.9362	27.6106	27.9122	27.9919	27.8376	27.8013	27.9455
A8K5S3;P53990;H3BMU1;H3BUI0;J3KR23;B4DLP1;H3BQF7;F5GXM3;B4DXC9;B4DM80;B4DHF3;H3BRE2	A8K5S3;P53990;H3BMU1;H3BUI0;J3KR23;B4DLP1;H3BQF7	IST1 homolog	IST1			28.8	39.766	0.239243	0.902691	0.11666	0.60729	0.356156	0.804526	0.227561	0.855694	26.042	26.0447	26.1102	25.8038	26.4134	26.3298	26.0394	26.5983	26.5919
A8K7W3;A8K5T7;Q9Y2Z0;B4DYC6;Q9P1S2	A8K7W3;A8K5T7;Q9Y2Z0;B4DYC6	Suppressor of G2 allele of SKP1 homolog	SUGT1			34.2	37.833	0.596993	0.740672	0.211962	1.33452	0.0847909	0.949124	0.0384369	0.239294	26.1896	26.1089	26.0184	26.0158	26.4746	26.4624	26.3669	26.2559	26.4453
A8K607;Q9UIA9;E7ESC6;B4DSP8;D3DSQ7;H0YBE1;E5RIW1	A8K607;Q9UIA9;E7ESC6;B4DSP8;D3DSQ7	Exportin-7	XPO7			22.5	123.93	0.0643179	0.975099	-0.0118872	-0.184841	0.279761	0.838862	0.0344601	0.695387	27.5941	27.7433	27.6569	27.744	27.5836	27.631	27.6813	27.667	27.7137
A8K622;Q59F99;O95793;A0A087X1A5;Q5JW30;B3KRE0;B4DPJ9;Q6PJX3;Q5JW28;F6UDC6	A8K622;Q59F99;O95793;A0A087X1A5;Q5JW30;B3KRE0	Double-stranded RNA-binding protein Staufen homolog 1	STAU1			30.7	63.192	1.46532	0.478913	0.0762761	3.15794	0.351335	0.808491	-0.0603053	-0.845762	27.2729	27.2302	27.2506	27.3635	27.2916	27.3275	27.4029	27.1872	27.2116
A8K651;Q07021;I3L3Q7;I3L3B0	A8K651;Q07021;I3L3Q7;I3L3B0	Complement component 1 Q subcomponent-binding protein, mitochondrial	C1QBP			31.9	31.38	0.733307	0.664723	0.222059	1.60024	0.243678	0.853157	0.108805	0.617059	26.4716	26.7348	26.8263	27.0218	26.951	26.726	26.9643	27.2911	26.7698
A8K654;B4DI41;Q9UIS9;K7EN65;K7EPZ6;B4DUR3;A0A0A0MS90	A8K654;B4DI41;Q9UIS9;K7EN65;K7EPZ6;B4DUR3;A0A0A0MS90	Methyl-CpG-binding domain protein 1	MBD1			6.1	66.617	0.186974	0.91837	-0.0635331	-0.489421	0.152385	0.909704	0.12226	0.408148	22.1032	22.3414	22.4169	22.3403	22.049	22.2816	21.9522	22.9022	22.1833
Q9BR63;A8K666;Q9NSD9;B7ZB32	Q9BR63;A8K666;Q9NSD9;B7ZB32	Phenylalanine--tRNA ligase beta subunit	FARSB			33.8	65.7	1.34398	0.513407	0.134636	2.87388	1.26645	0.499356	0.106614	2.69912	27.4347	27.4138	27.326	27.4925	27.5921	27.4938	27.5936	27.636	27.6687
V9HW72;A8K690;P31948;F5H783;H0YGI8;F5GXD8	V9HW72;A8K690;P31948	Stress-induced-phosphoprotein 1	HEL-S-94n;STIP1			60.4	62.639	0.826962	0.632613	0.141835	1.78423	0.3988	0.792883	0.112258	0.942706	31.3982	31.2448	31.2843	31.3475	31.5704	31.4349	31.3845	31.5753	31.7298
E9PC52;Q6FHQ0;A8K6A2;Q16576;Q5JP02;Q5JP01;Q5JNZ6	E9PC52;Q6FHQ0;A8K6A2;Q16576	Histone-binding protein RBBP7	RBBP7			21.9	46.938	0.074554	0.974324	0.0311012	0.21229	1.87003	0.376889	0.313107	4.21897	25.9455	26.3923	26.3396	26.226	26.2086	26.3361	26.6834	26.4675	26.5591
A8K6D2;Q92979;A0A087WVM7;B4DQC7;B4DP65;V9GYP5;A0A087WWQ2;A0A0U3B3H7	A8K6D2;Q92979;A0A087WVM7;B4DQC7	Ribosomal RNA small subunit methyltransferase NEP1	EMG1			27.5	26.692	0.852944	0.629153	0.221696	1.83568	0.154621	0.909114	-0.0524483	-0.413493	24.8612	24.938	25.0827	25.3125	24.9816	25.2528	25.2127	25.1981	24.9788
A8K6G9;Q92620;B4DET0;B4DM30;B4DN69;H3BQT9;H3BV01;J3KRT1;J3KTG2;H3BMS7;J3KSA8	A8K6G9;Q92620;B4DET0;B4DM30	Pre-mRNA-splicing factor ATP-dependent RNA helicase PRP16	DHX38			28	140.47	0.656366	0.709561	-0.0680663	-1.45018	1.66576	0.421091	0.103608	3.65953	27.6041	27.6693	27.5092	27.533	27.5131	27.5323	27.5896	27.6825	27.6171
A8K6I6;Q9NZ52;J3KSS7;A8K6M0;B7Z456;J3QRS8;J3KSG3;B7Z7R9;B7Z1E9;B0QYR9;B0QYS0;B0QYS1;A0A087WYN2;B0QYS2;B0QYS3;B0QYR5;J3KTR5;B7Z9A2;H3BPI3;J3QRP3;J3QS87	A8K6I6;Q9NZ52;J3KSS7;A8K6M0;B7Z456	ADP-ribosylation factor-binding protein GGA3	GGA3			10.1	78.255	0.952428	0.586809	0.15484	2.035	0.678018	0.645693	-0.263339	-1.49236	24.3	24.393	24.5482	24.6138	24.5565	24.5353	24.3859	23.9701	24.5596
A8K6Q3;Q7L0J3	A8K6Q3;Q7L0J3	Synaptic vesicle glycoprotein 2A	SV2A			2.6	82.695	0.0825396	0.971366	-0.0290222	-0.233393	0.276595	0.8398	0.0969575	0.688592	24.4931	24.4433	24.422	24.4918	24.1859	24.5937	24.3821	24.5932	24.5869
A8K6Q8;P02786;G3V0E5;B7Z2I6;F8WBE5;H7C3V5;Q9UP52	A8K6Q8;P02786;G3V0E5;B7Z2I6	Transferrin receptor protein 1;Transferrin receptor protein 1, serum form	TFRC			45.4	84.872	0.0389404	0.98995	-0.00434621	-0.114661	0.194423	0.88464	-0.0217234	-0.506558	29.5493	29.6796	29.6134	29.6187	29.6052	29.6054	29.591	29.5127	29.6604
F5H8F7;B4DPT1;A8K6T5;Q9UBL3;H0YBF6;B4DEM3;H0YAQ0	F5H8F7;B4DPT1;A8K6T5;Q9UBL3	Set1/Ash2 histone methyltransferase complex subunit ASH2	ASH2L			22.5	55.324	0.453987	0.802623	0.0866165	1.05343	0.27941	0.838439	-0.0734762	-0.694635	25.7017	25.7292	25.8116	25.6898	25.9436	25.869	25.7146	25.6613	25.906
A8K6X3;A0A0C4DG89;Q7L014;D3DQA6;D6RJA6;Q0VGL8;H0Y9U3	A8K6X3;A0A0C4DG89;Q7L014;D3DQA6	Probable ATP-dependent RNA helicase DDX46	DDX46			20.3	117.47	1.05274	0.545223	-0.179821	-2.24059	0.225473	0.864019	-0.0771459	-0.576744	27.0757	27.0265	27.081	26.8455	26.767	27.0313	26.6432	26.7588	27.0104
A8K6X9;Q6PD62;H0YCE8	A8K6X9;Q6PD62	RNA polymerase-associated protein CTR9 homolog	CTR9			18.2	133.53	0.937818	0.592814	-0.162104	-2.00547	0.167502	0.901601	-0.0545317	-0.444033	26.9231	26.9684	26.9781	26.9525	26.7138	26.717	26.559	26.7861	26.8747
B4DMI9;A8K732;Q15398	B4DMI9;A8K732;Q15398	Disks large-associated protein 5	DLGAP5			7.3	88.928	0.155294	0.935711	-0.157047	-0.415099	0.821519	0.596414	0.698348	1.77347	22.5417	22.4031	22.404	21.5473	22.7456	22.5849	23.1592	22.7622	23.0514
Q9UEH5;Q6IPW4;Q6IB76;A8K750;E7EPT4;P19404	Q9UEH5;Q6IPW4;Q6IB76;A8K750;E7EPT4;P19404	NADH dehydrogenase [ubiquinone] flavoprotein 2, mitochondrial	NDUFV2			22.9	25.43	1.01726	0.555151	0.981468	2.16727	0.0821383	0.952578	-0.0930119	-0.232338	22.8358	23.6907	22.1527	23.775	24.0426	23.806	24.2539	24.0857	23.005
H3BPJ9;A8K761;O96000;Q96RX5;H3BV16	H3BPJ9;A8K761;O96000	NADH dehydrogenase [ubiquinone] 1 beta subcomplex subunit 10	NDUFB10			21.7	19.258	0.406302	0.821736	-0.514441	-0.957868	0.494677	0.738084	-1.01895	-1.13406	24.6453	24.8707	25.1585	25.159	23.4025	24.5696	24.7817	22.9667	22.3259
A8K7B1;Q96T51;H0YA47;H0YAC8;B3KSL1;J3KPP6;H0Y9Y8	A8K7B1;Q96T51;H0YA47	RUN and FYVE domain-containing protein 1	RUFY1			26.8	69.063	0.194669	0.91511	-0.0373389	-0.507121	0.663587	0.65449	0.160353	1.46425	26.1627	26.0637	26.1068	26.2061	25.9819	26.0332	26.0732	26.2618	26.3672
[truncated: 1,825 more rows]

## Sheet: SH-SY5Y_FBP2
Protein IDs	Majority protein IDs	Protein names	Gene names	Student's T-test Significant 2_D	Student's T-test Significant 2k_2	Sequence coverage [%]	Mol. weight [kDa]	-Log Student's T-test p-value 2_D	Student's T-test q-value 2_D	Student's T-test Difference 2_D	Student's T-test Test statistic 2_D	-Log Student's T-test p-value 2k_2	Student's T-test q-value 2k_2	Student's T-test Difference 2k_2	Student's T-test Test statistic 2k_2	LFQ intensity DMSO_1	LFQ intensity DMSO_2	LFQ intensity DMSO_3	LFQ intensity FBP2_1	LFQ intensity FBP2_2	LFQ intensity FBP2_3	LFQ intensity FBP2K_1	LFQ intensity FBP2K_2	LFQ intensity FBP2K_3
[truncated: 3,091 more rows]

[truncated: 4 more sheets: HeLa_FBP1, HeLa_FBP2, SH-SY5Y_FBPP2, HeLa_FBPP2]
